# Supplementary material for: 100 Years of IAHS – Graphic capitalisation and poetic celebration
Source: Copernicus journal article supplement (doi:10.5194/piahs-385-499-2025), 2025-02-11

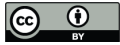

## *Supplement of*

# **100 Years of IAHS – Graphic capitalisation and poetic celebration**

**Christophe Cudennec**

*Correspondence to:* Christophe Cudennec ([christophe.cudennec@institut-agro.fr](mailto:christophe.cudennec@institut-agro.fr))

The copyright of individual parts of the supplement might differ from the article licence.

Figure S1: Poster of IAHS highlights during the 1922–1932 decade. Credit: IAHS and Christophe Cudennec.

Figure S2: Poster of IAHS highlights during the 1932–1942 decade. Credit: IAHS and Christophe Cudennec. Maps: © IAHS.

Figure S3: Poster of IAHS highlights during the 1942–1952 decade. Credit: IAHS and Christophe Cudennec. Maps: © IAHS.

Figure S4: Poster of IAHS highlights during the 1952–1962 decade. Credit: IAHS and Christophe Cudennec. Maps: © IAHS.

Figure S5: Poster of IAHS highlights during the 1962–1972 decade. Credit: IAHS and Christophe Cudennec. Maps: © IAHS.

Figure S6: Poster of IAHS highlights during the 1972–1982 decade. Credit: IAHS and Christophe Cudennec. Maps: © IAHS.

Figure S7: Poster of IAHS highlights during the 1982–1992 decade. Credit: IAHS and Christophe Cudennec.

Figure S8: Poster of IAHS highlights during the 1992–2002 decade. Credit: IAHS and Christophe Cudennec. Maps: © IAHS.

Figure S9: Poster of IAHS highlights during the 2002–2012 decade. Credit: IAHS and Christophe Cudennec.

Figure S10: Poster of IAHS highlights during the 2012–2022 decade. Credit: IAHS and Christophe Cudennec.

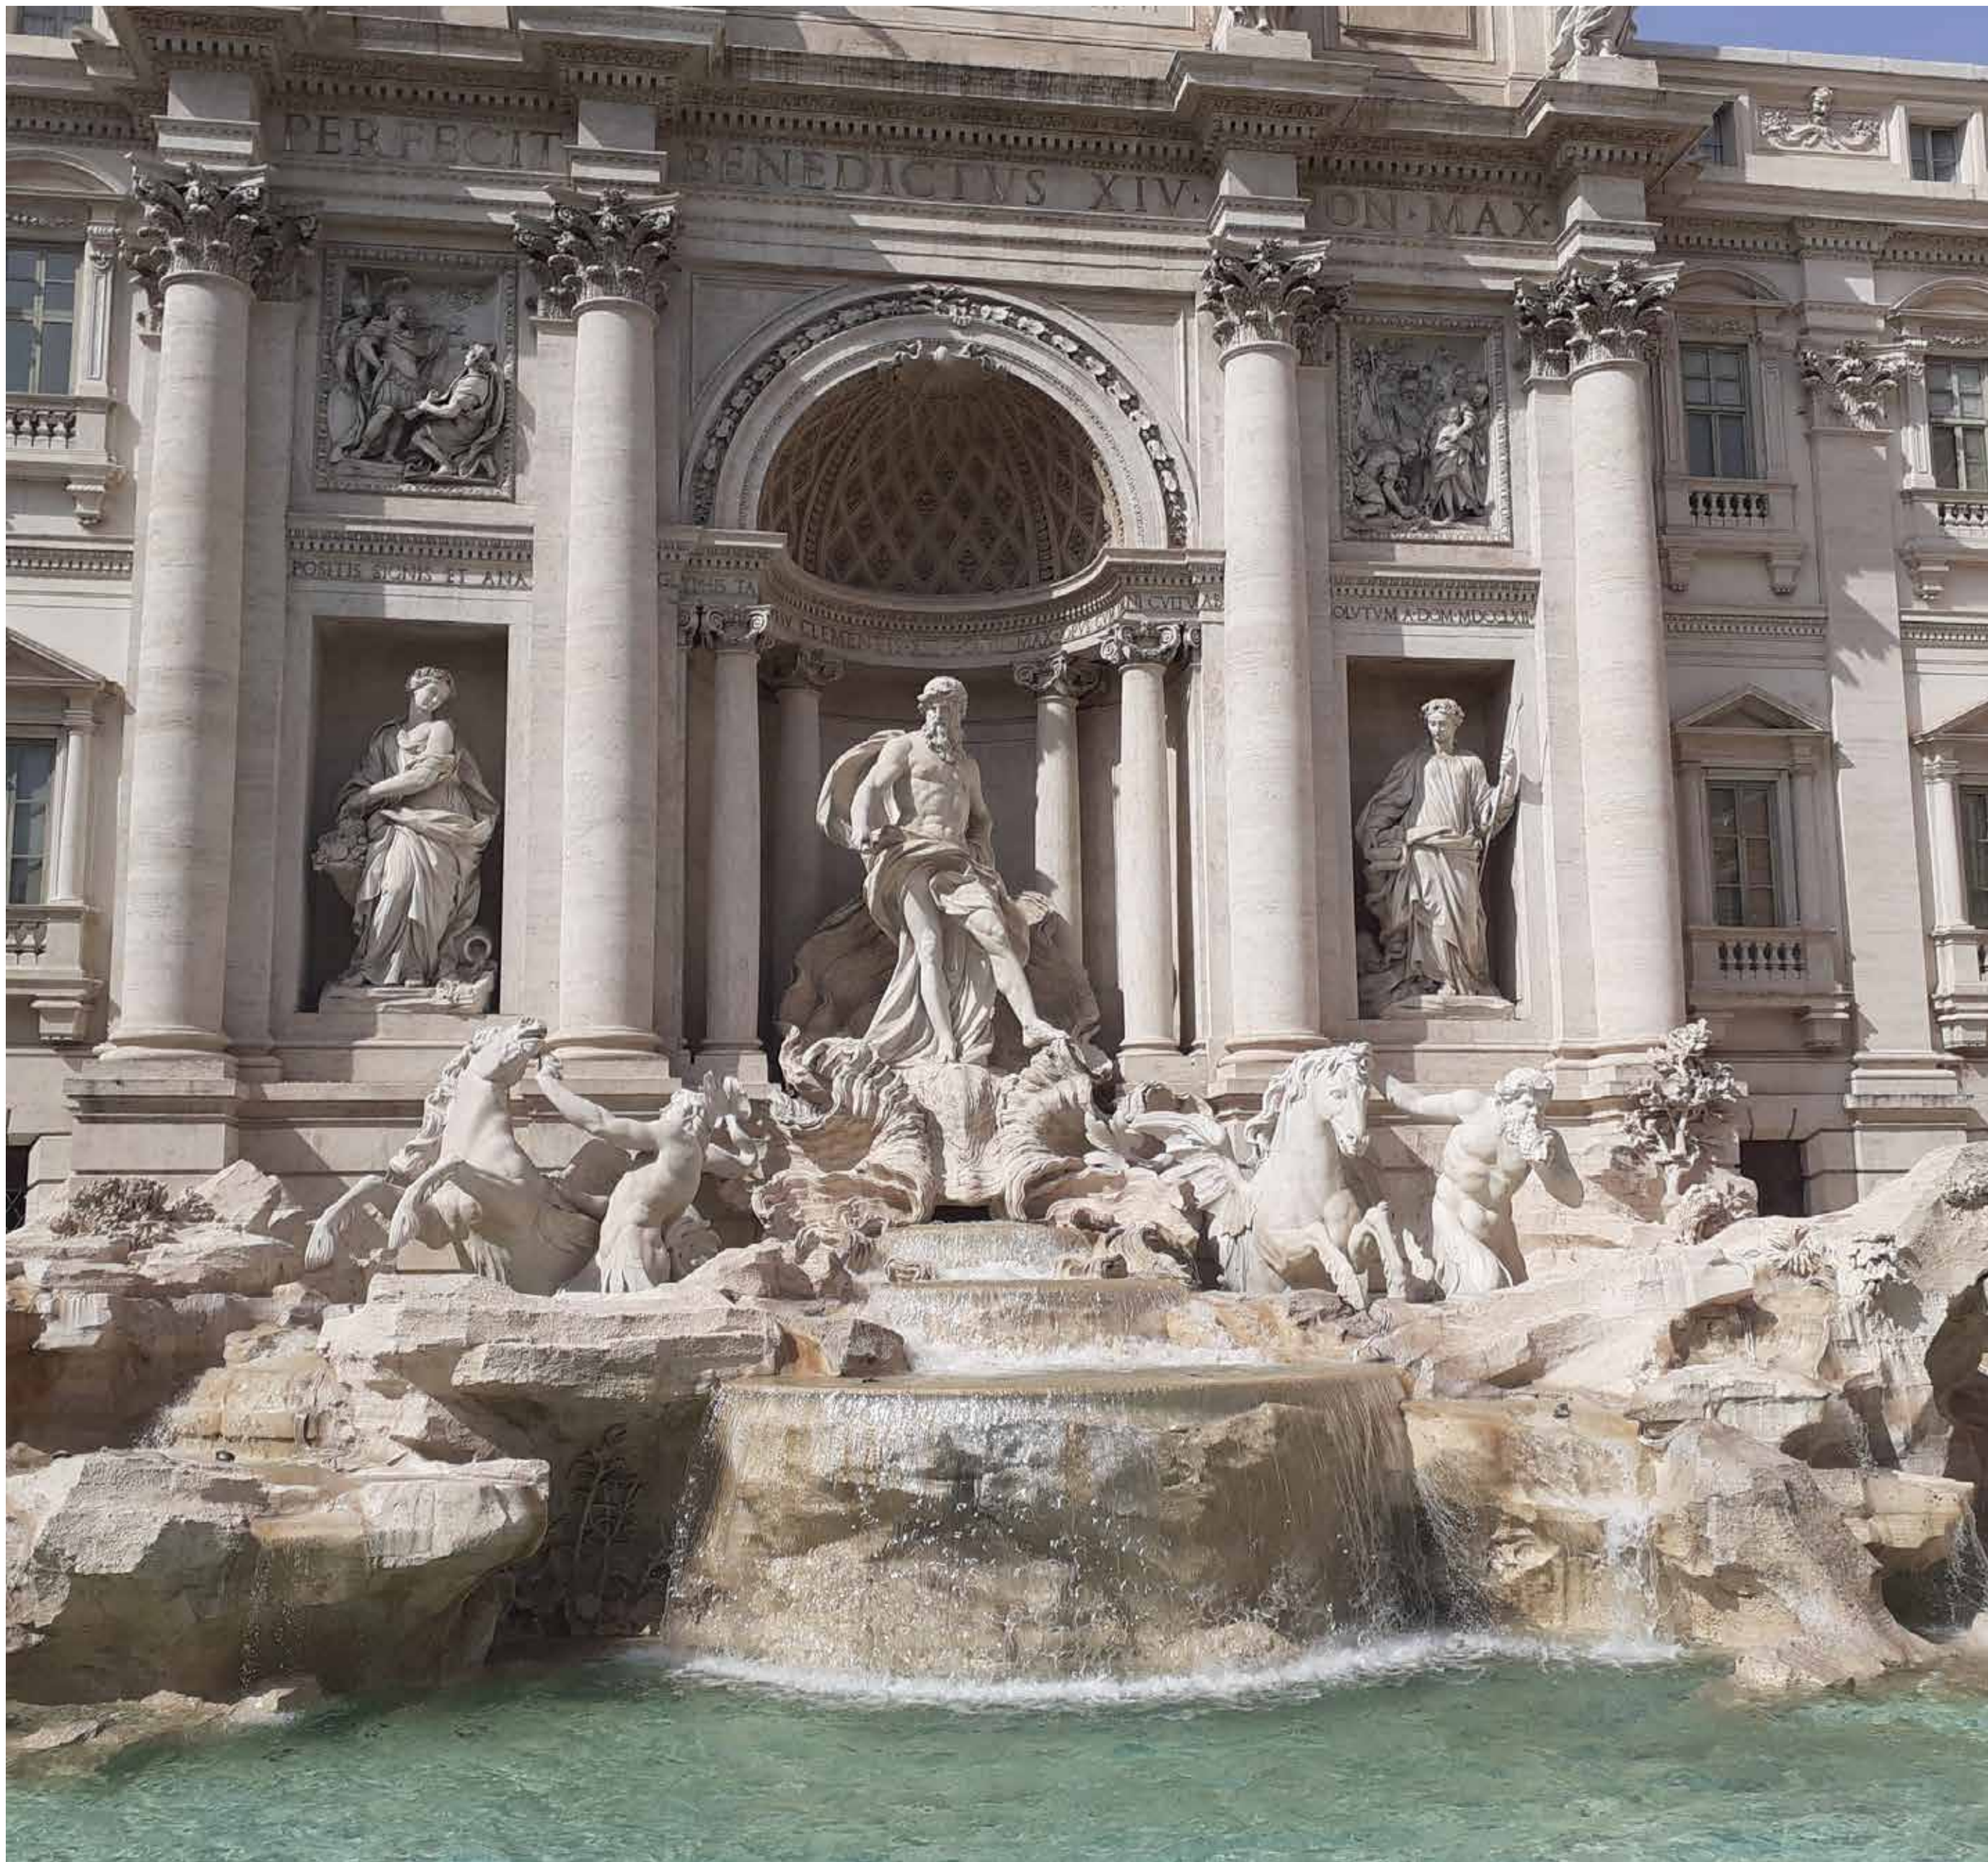

1919: Creation of IRC, International Research Council  
& IUGG, International Union of Geodesy and Geophysics  
1922, Rome: Creation of the Section of Scientific Hydrology  
Incorporation of International Commission of Glaciers (1894)

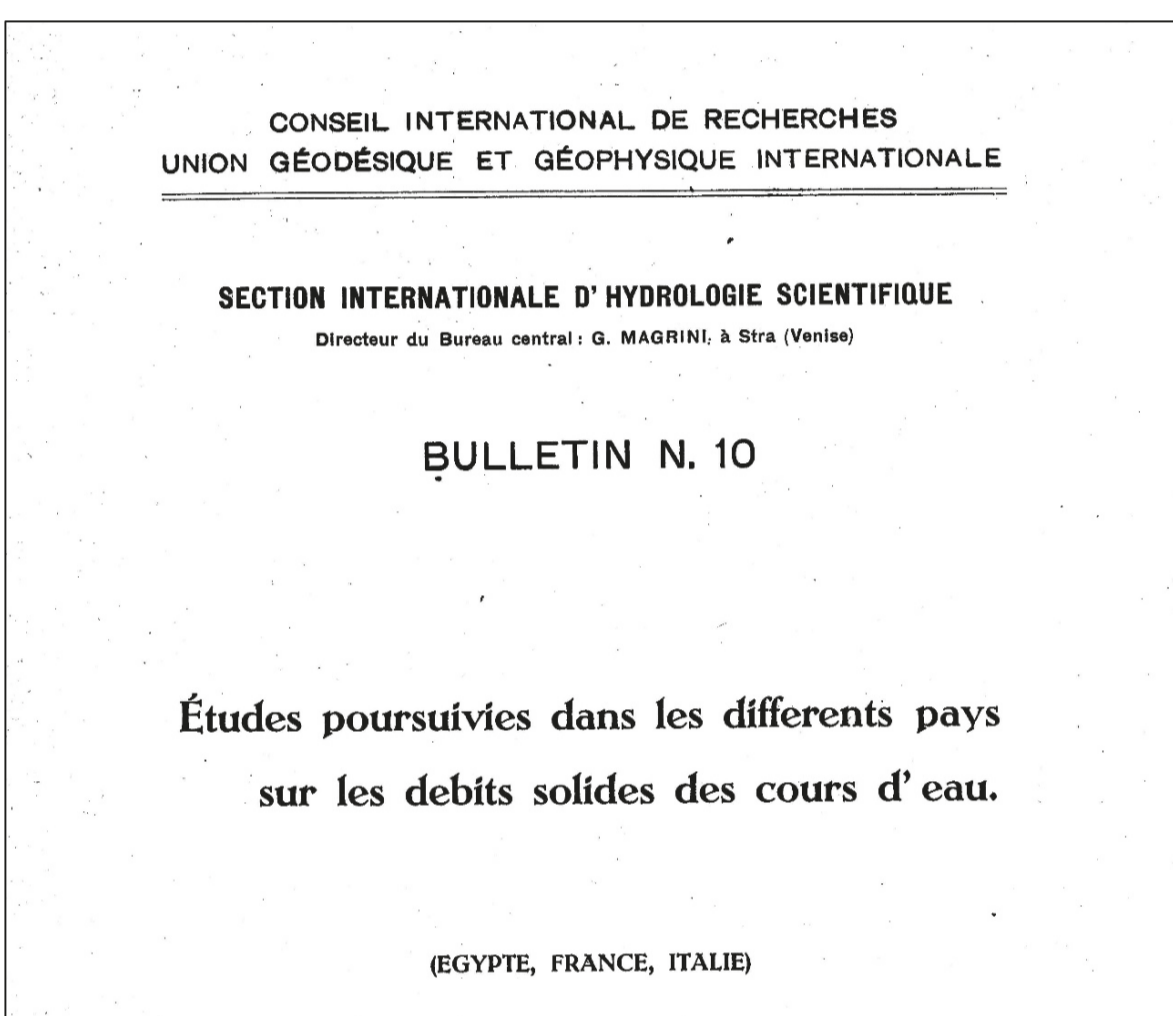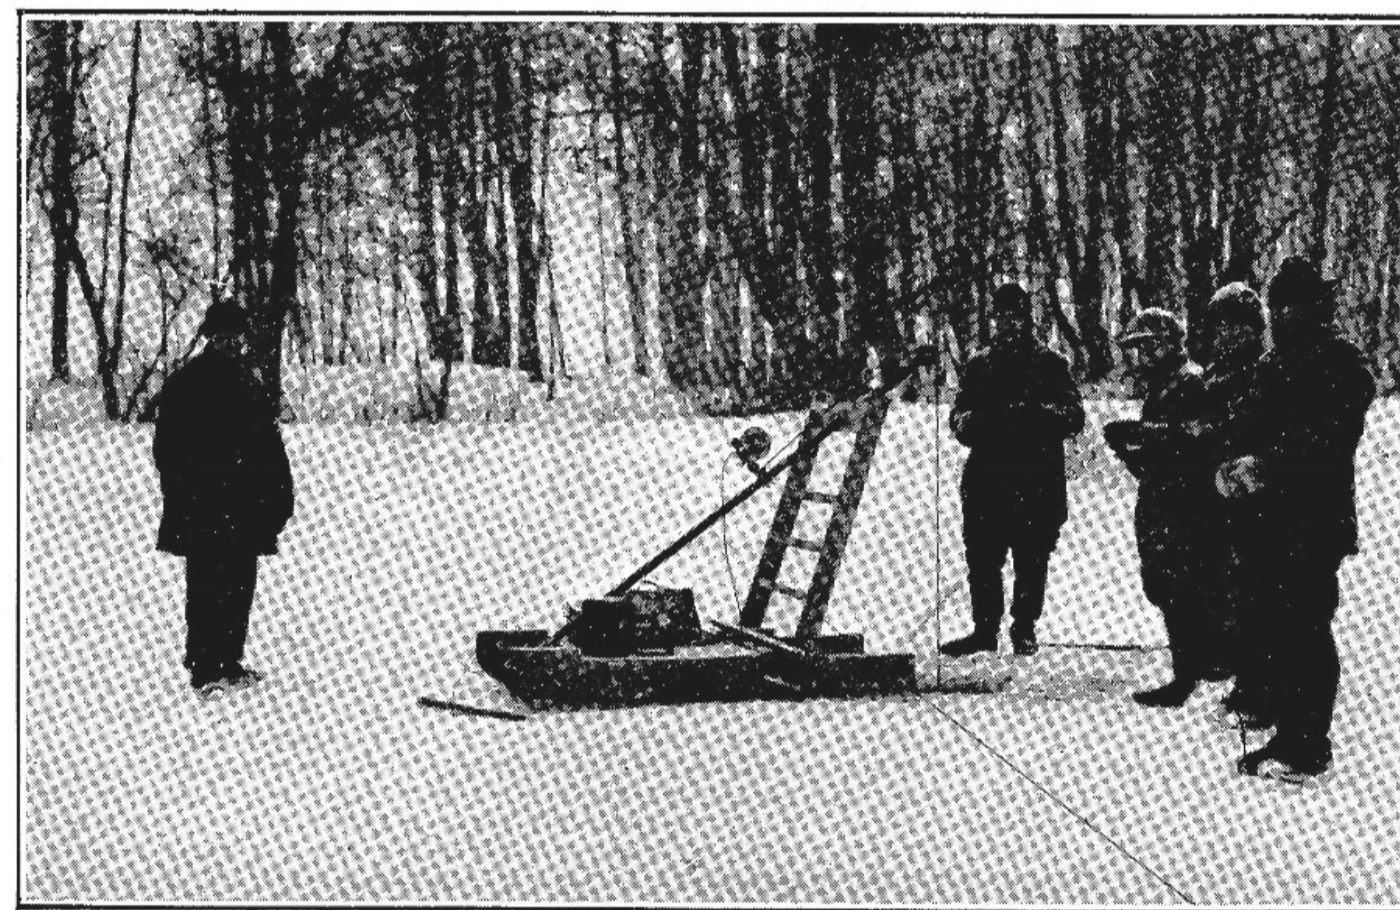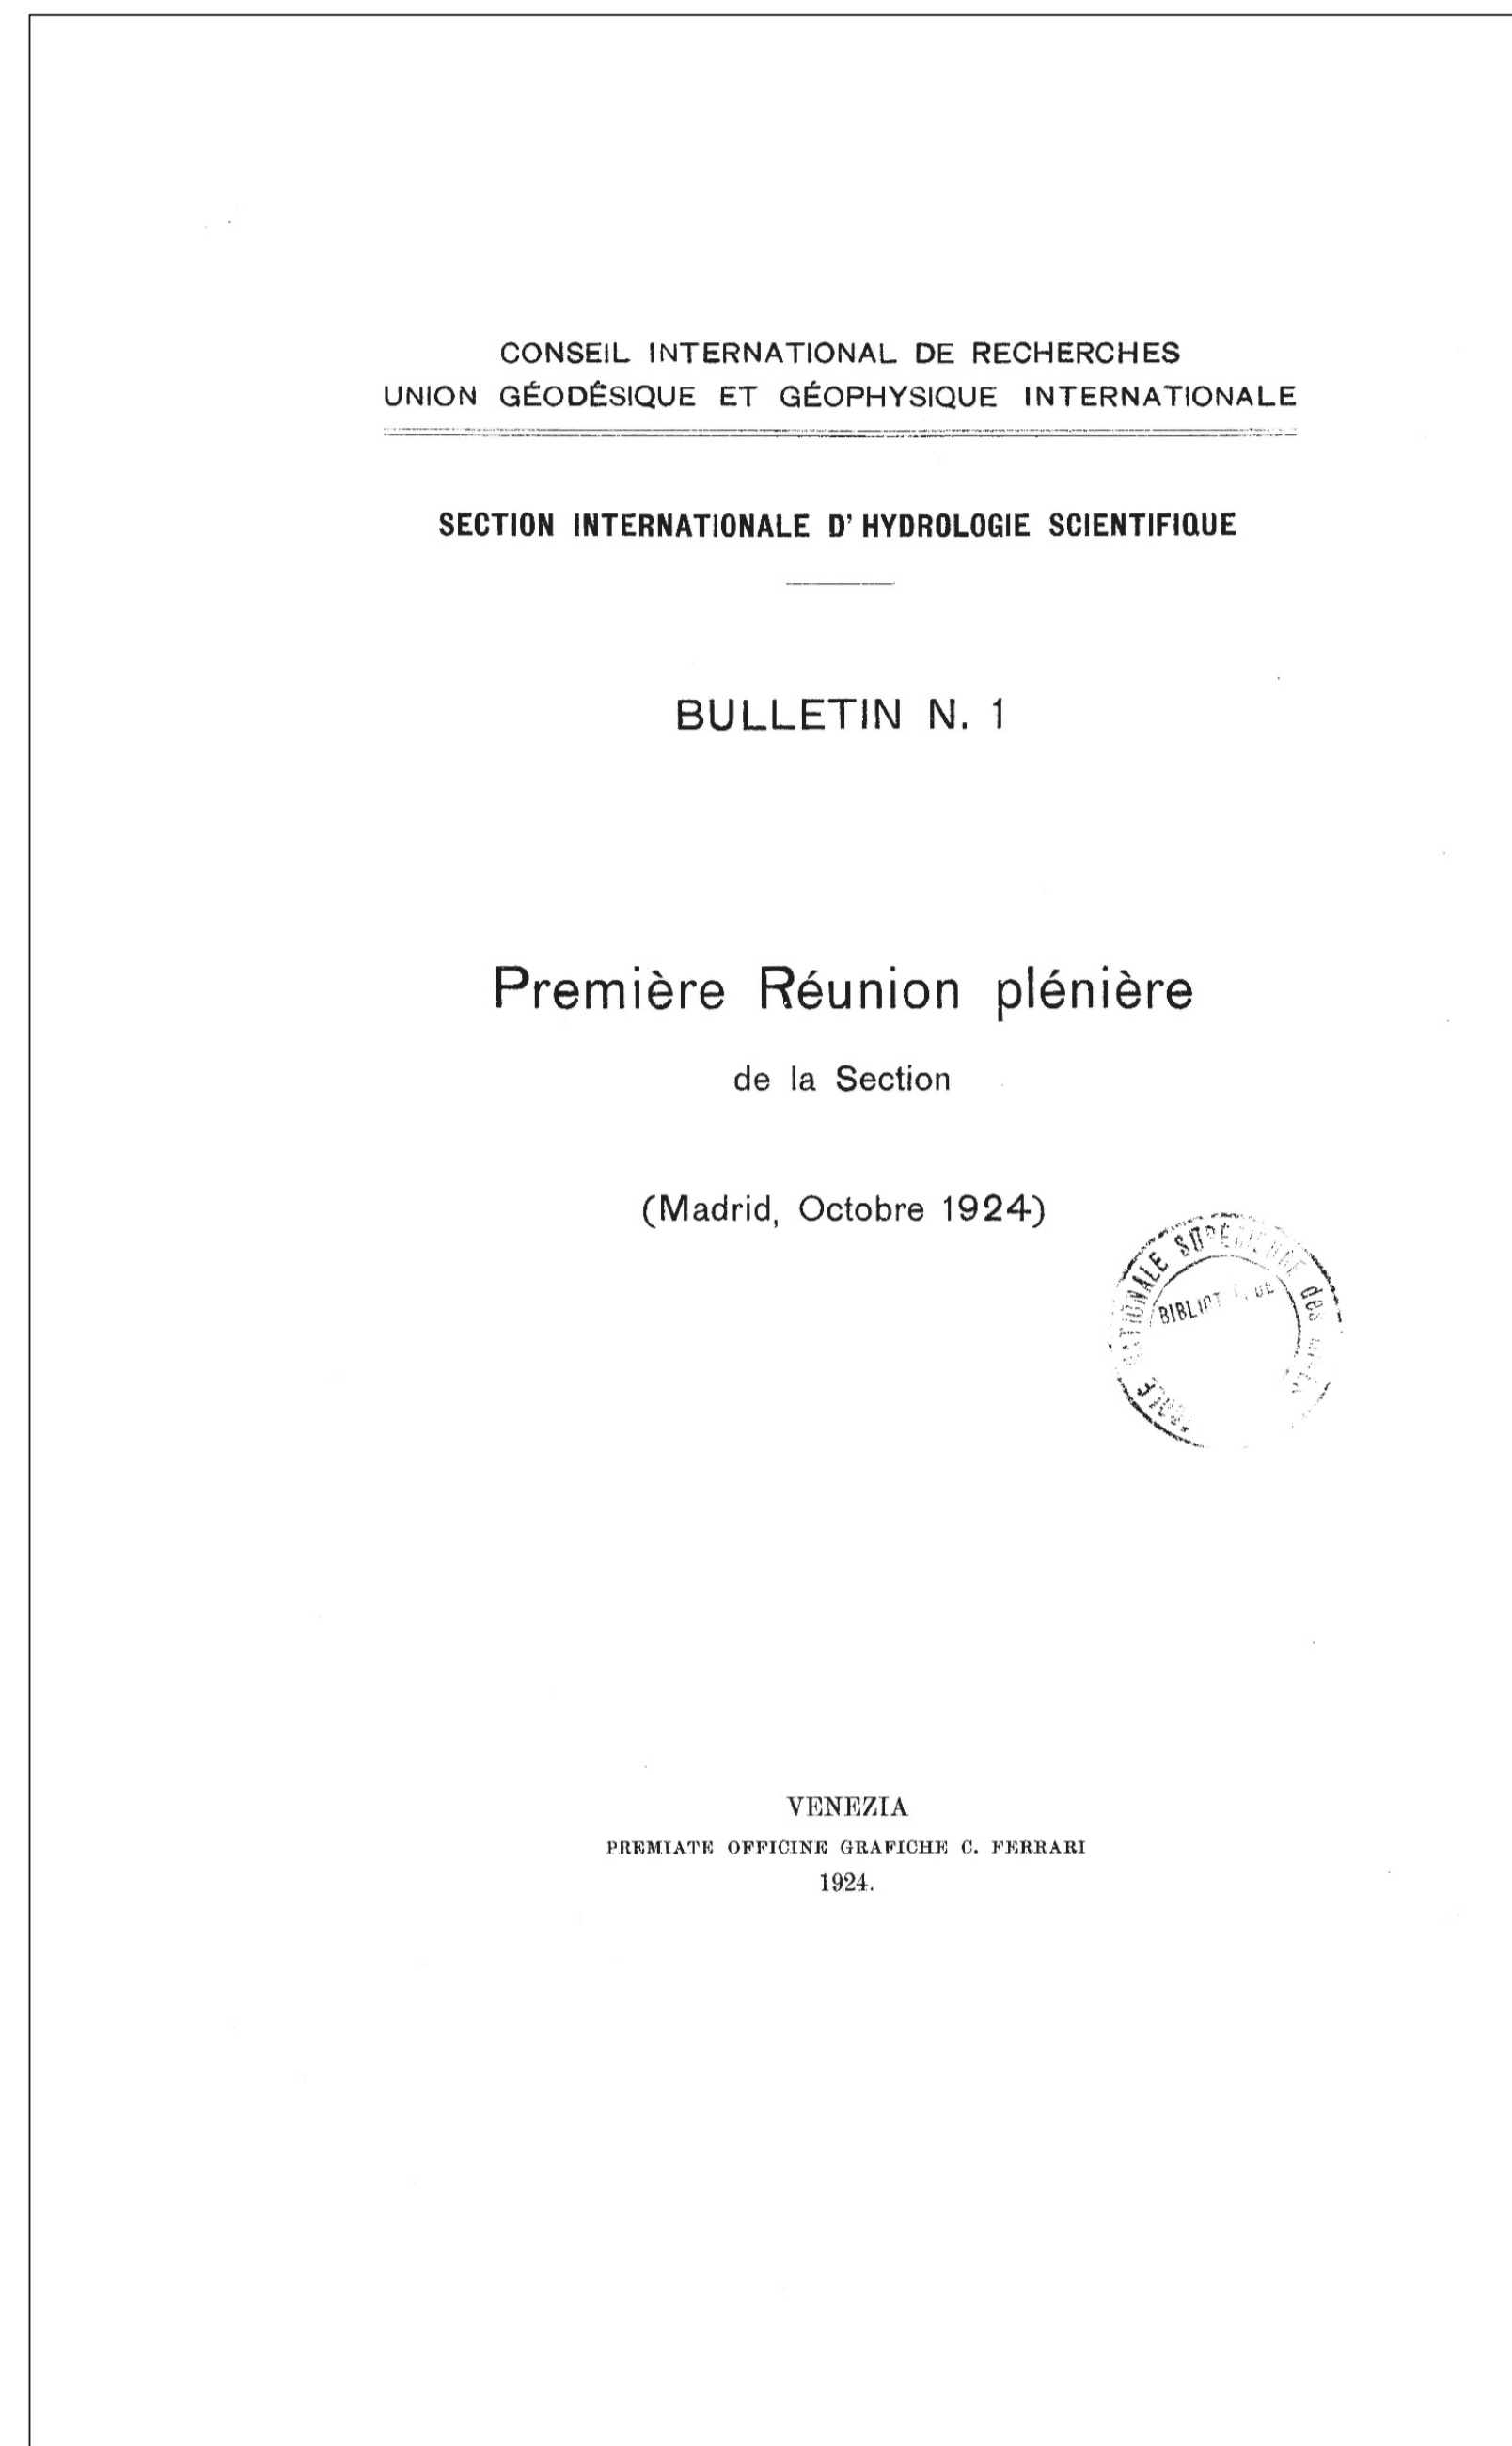

"L'Assemblée générale approuva à l'unanimité la proposition de la Commission et nomma: président de la Section: M. M. B. H. Wade, *Physical Department, Public Work Ministry, Cairo (Egypte)* secrétaire de la Section: M. le prof. Giovanni Magrini, *professeur d'Hydrographie à l'Ecole d'application pour les ingénieurs de Padoue, Stra (Venise, Italie)* — tout en remettant à la Section le choix de son Comité exécutif. Les pays adhérents seront tenus à déléguer un membre de leur Comité national à intervenir dans le Comité exécutif.

"L'Assemblée générale délibéra d'autoriser le Comité exécutif de la Section à l'éventuelle constitution de différentes Commissions proposées dans la relation présentée à l'Assemblée générale — On proposa aussi de considérer l'opportunité d'instituer une Commission pour l'étude des méthodes statistiques à utiliser pour les recherches de l'Hydrologie scientifique.

"Tous les Comités nationaux devraient porter pourvoir à la constitution de leur propre Section nationale d'Hydrologie scientifique et nommer leur délégué dans le Comité exécutif de la Section internationale."

- Le président rappelle que quelques uns des Comités nationaux ont déjà répondu, annonçant la constitution de leurs Sections nationales, d'autres déclarent vouloir attendre la première réunion, qui a lieu maintenant, pour nommer les délégués.
- La réunion actuelle doit par conséquent être considérée comme étant une véritable réunion constitutive.
- Le président remarque que l'ordre du jour, qui fut communiqué aux délégués déjà nommés pour assister à la présente réunion et aux différents Comités nationaux, est le suivant:
- 1) Ouverture de la séance.
  - 2) Rapport du président.
  - 3) Organisation de la Section.
    - a) Constitution des Sections nationales. Composition et constitution du Comité exécutif.
    - b) Composition et constitution des Commissions d'étude.
      - I — pour la Potamologie.
      - II — pour la Limnologie.
      - III — pour les eaux souterraines.
      - IV — pour la Glaciologie.
      - V — pour l'application des méthodes statistiques à l'Hydrologie.
    - c) Constitution de la Bibliothèque centrale de la Section et préparation du catalogue relatif.
    - d) Publication du Bulletin bibliographique de la Section.
    - e) Échange des publications parmi les différents pays.
    - f) Budget. — Contribution des pays adhérents pour le budget de la Section.
  - 4) Rapport sur l'activité des divers pays dans le camp de l'Hydrologie scientifique.

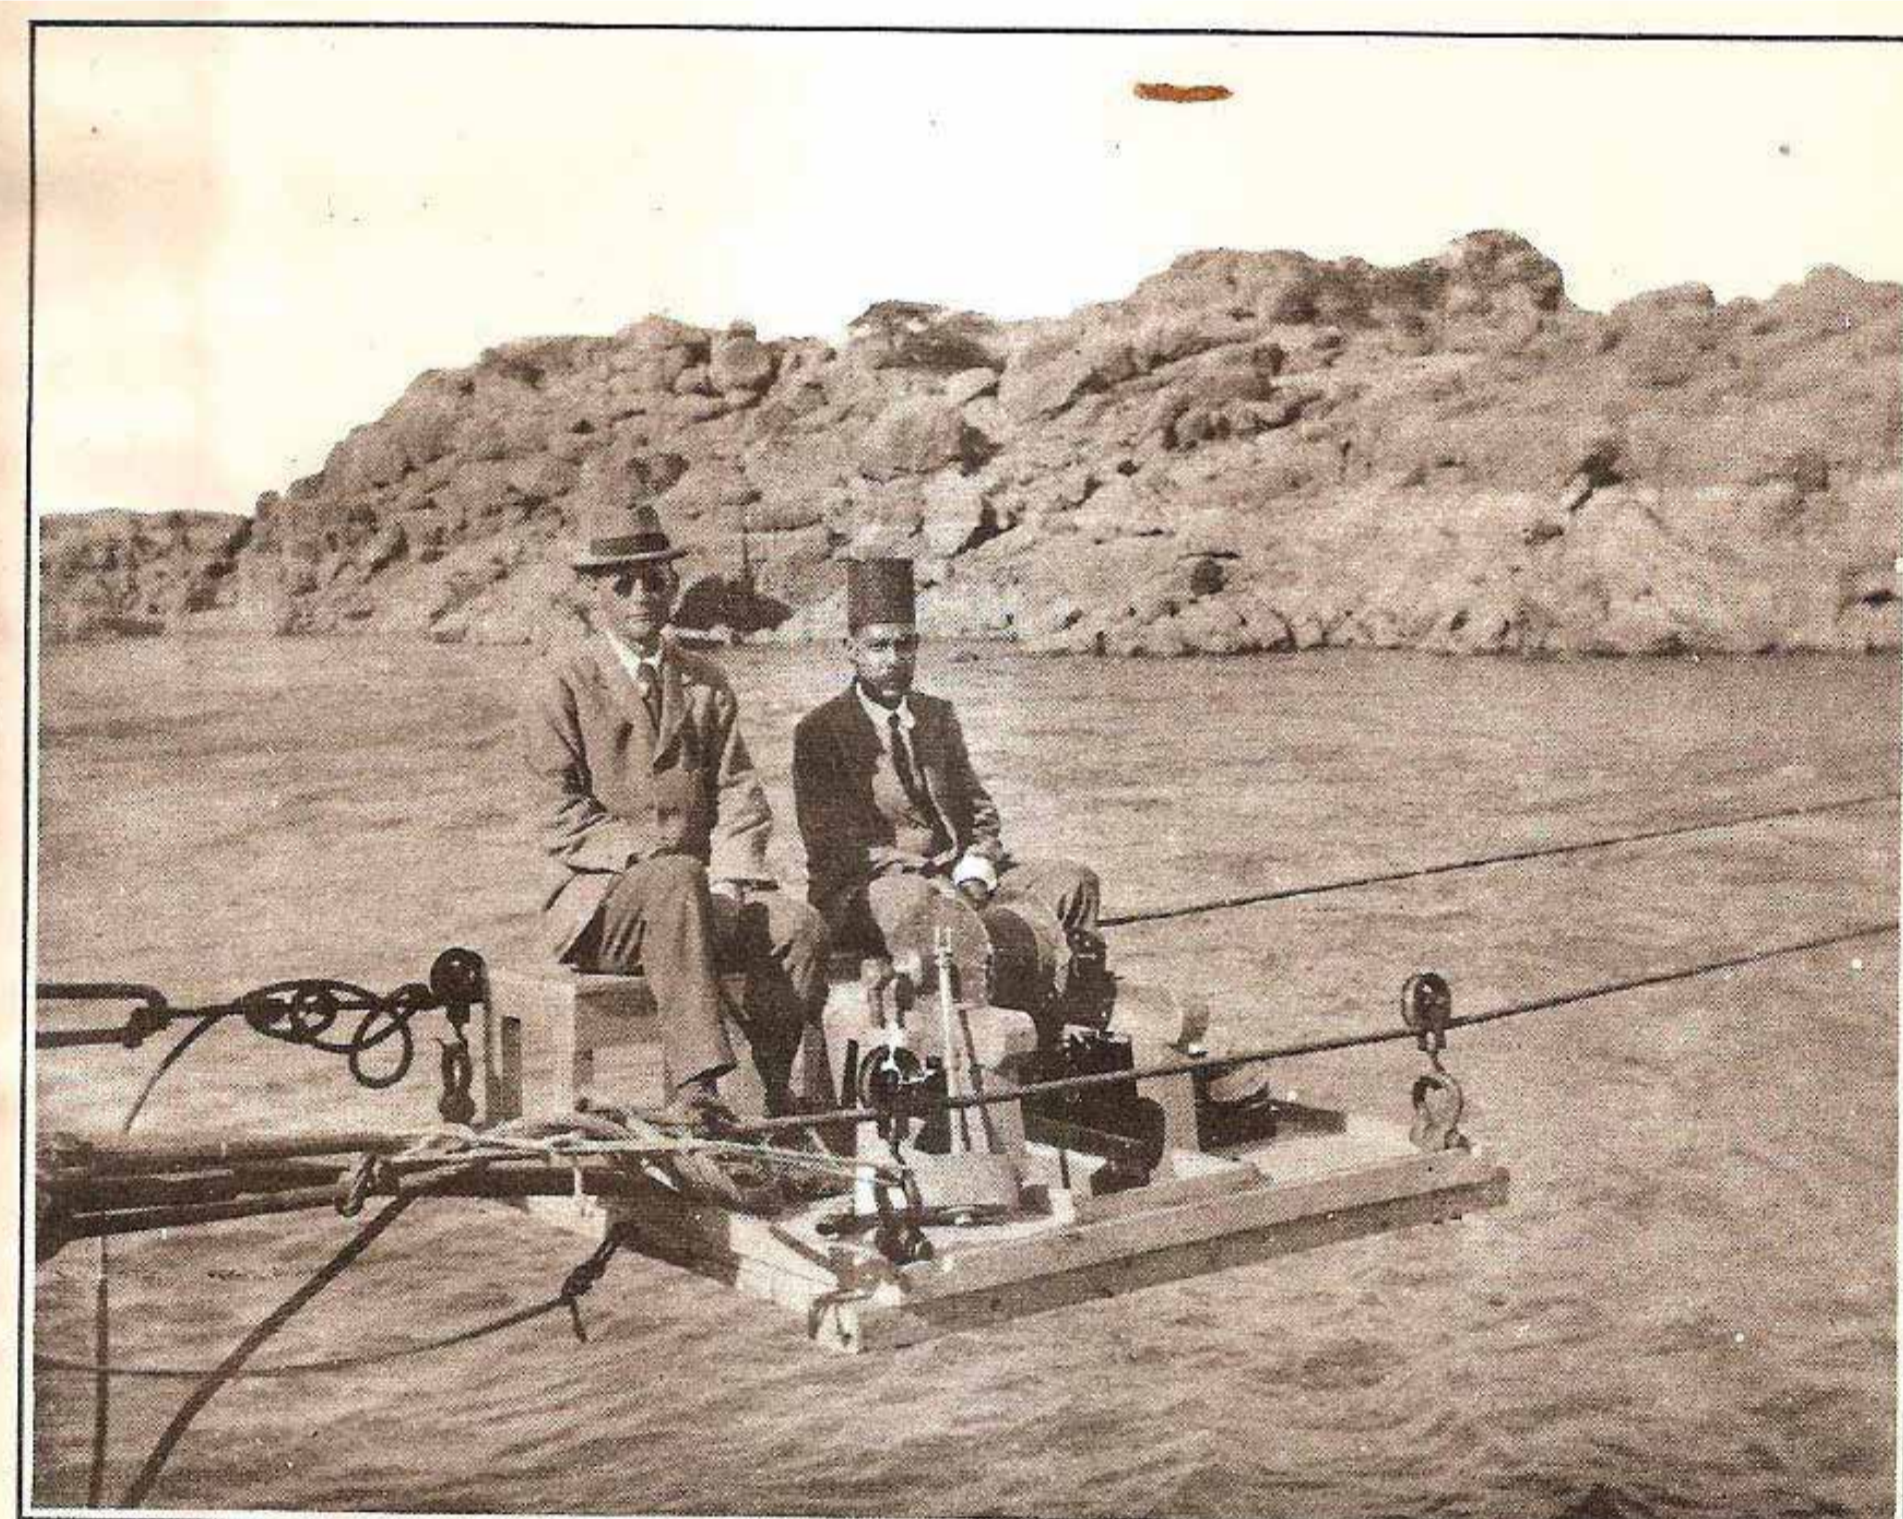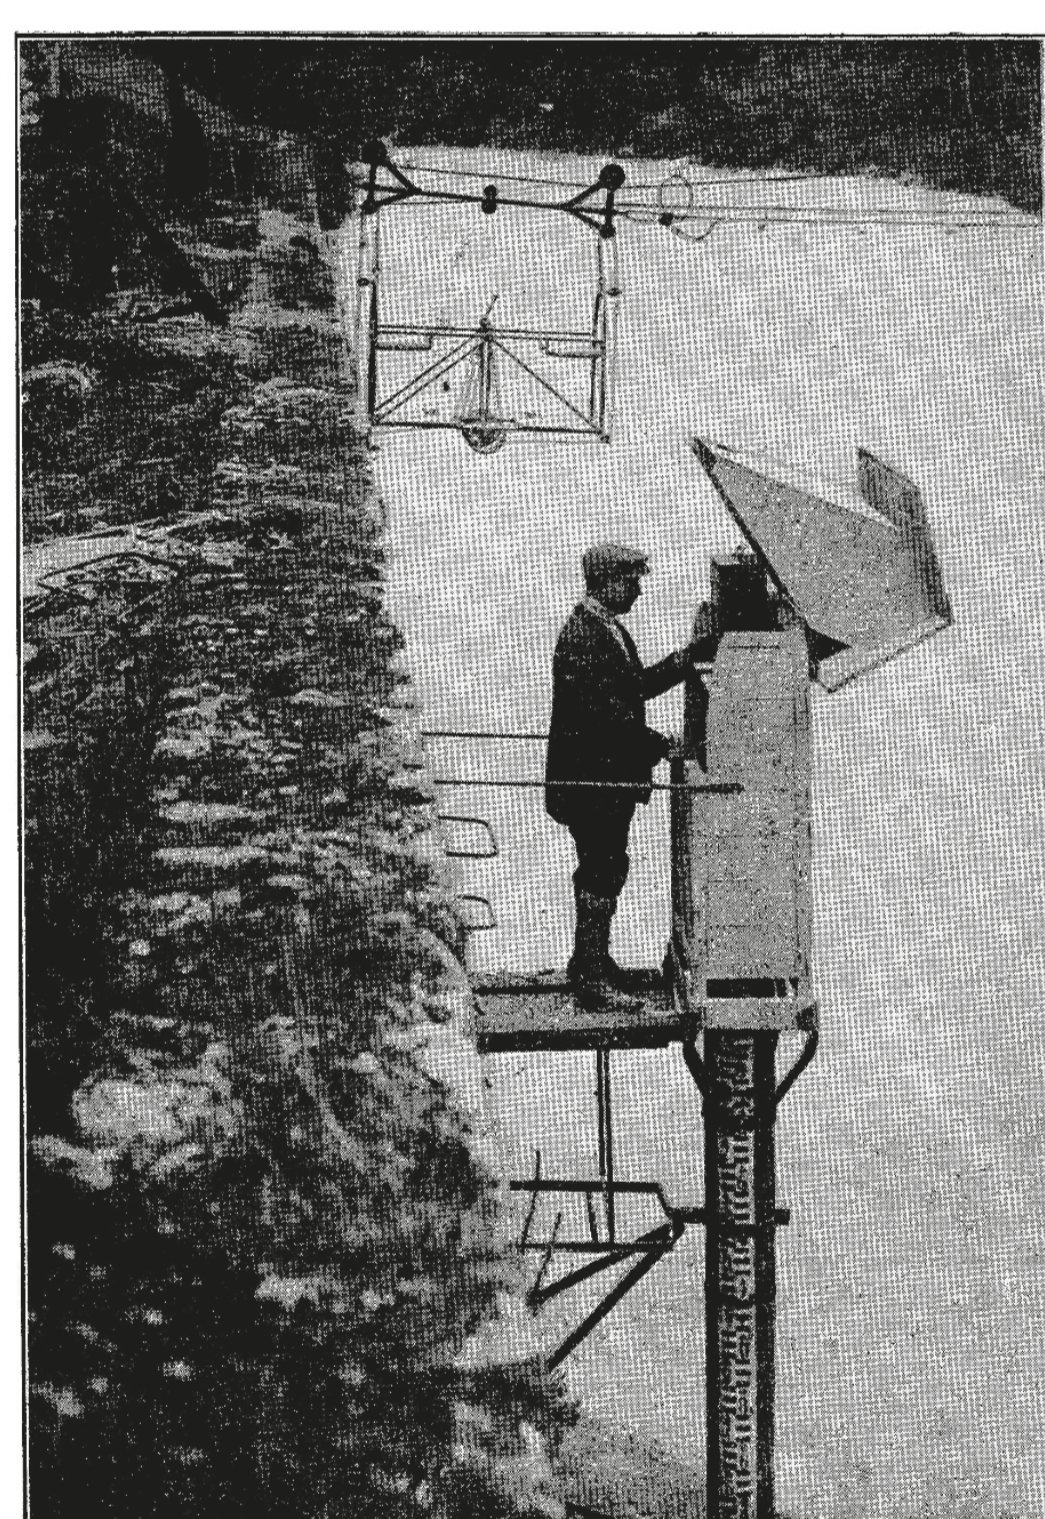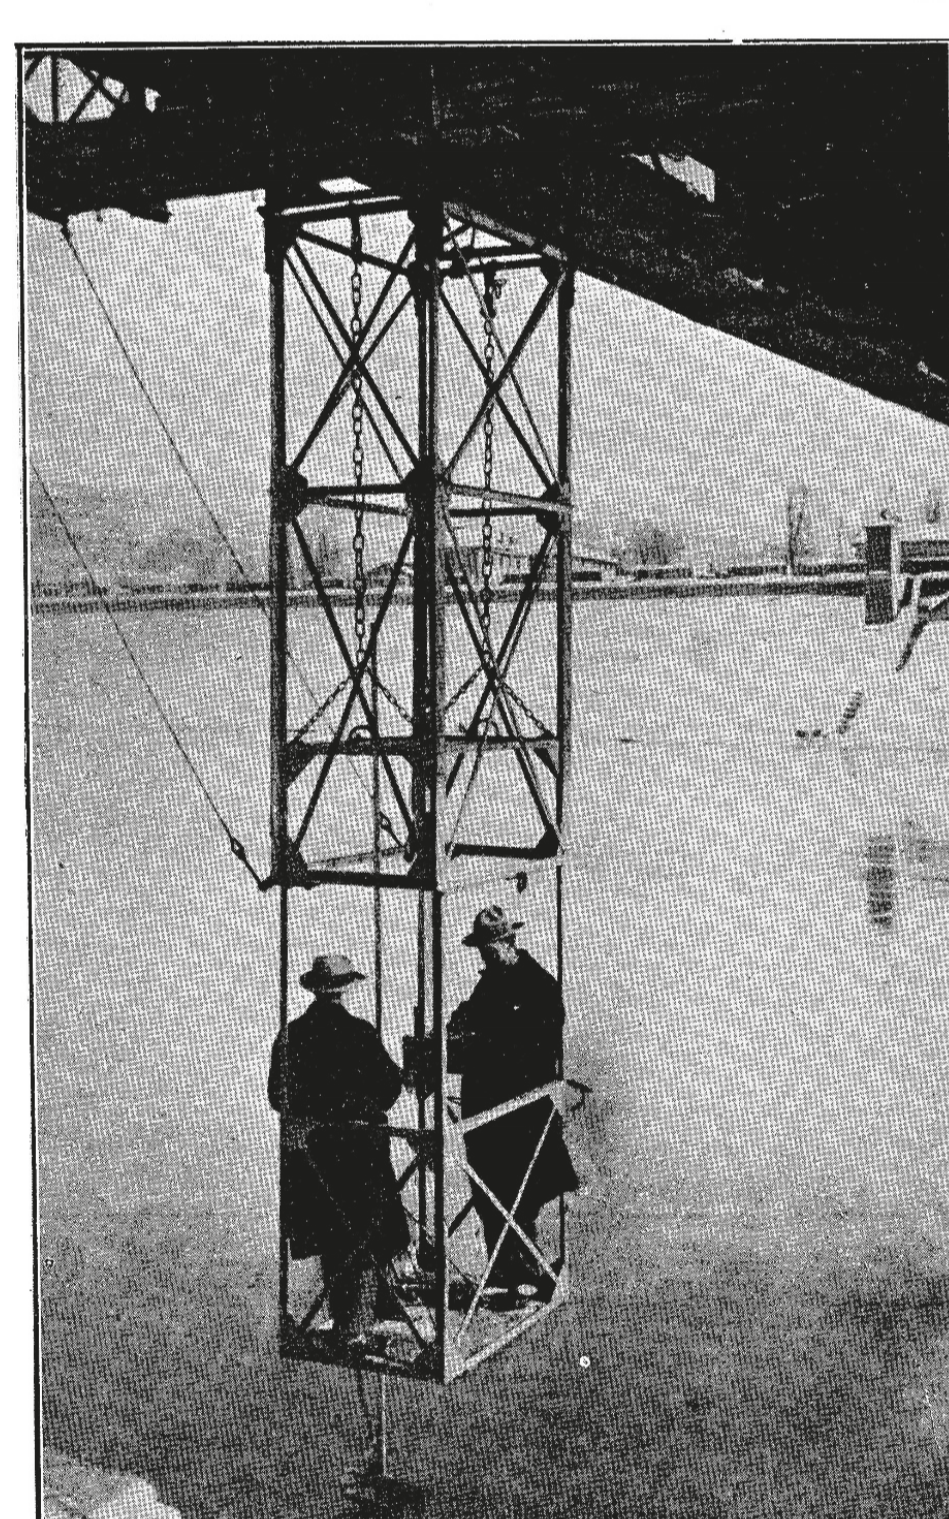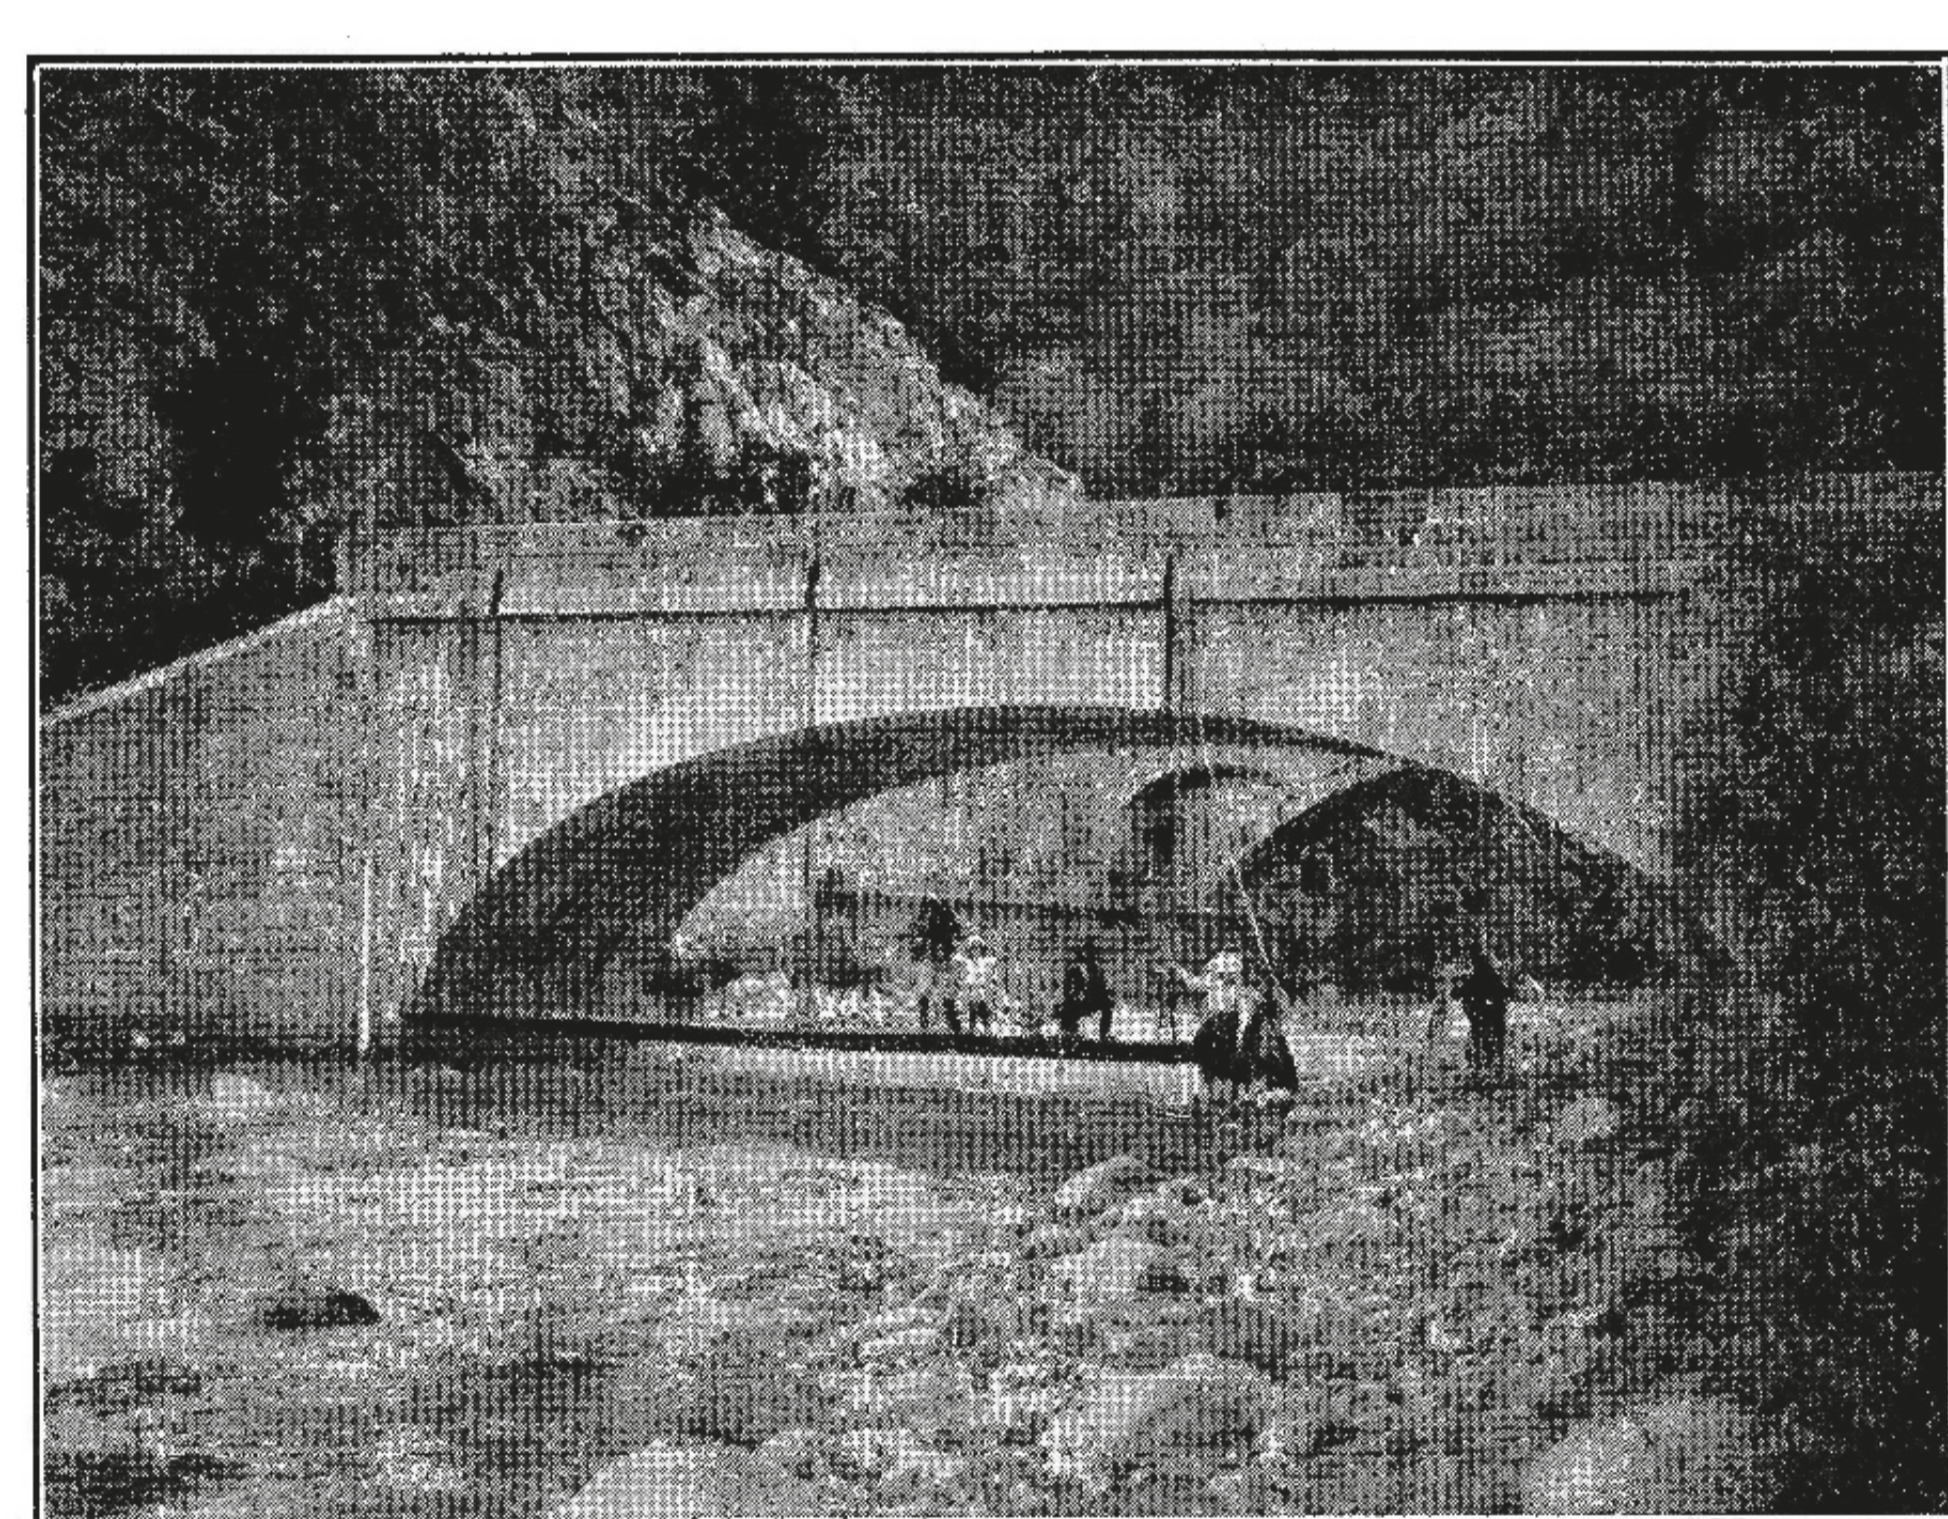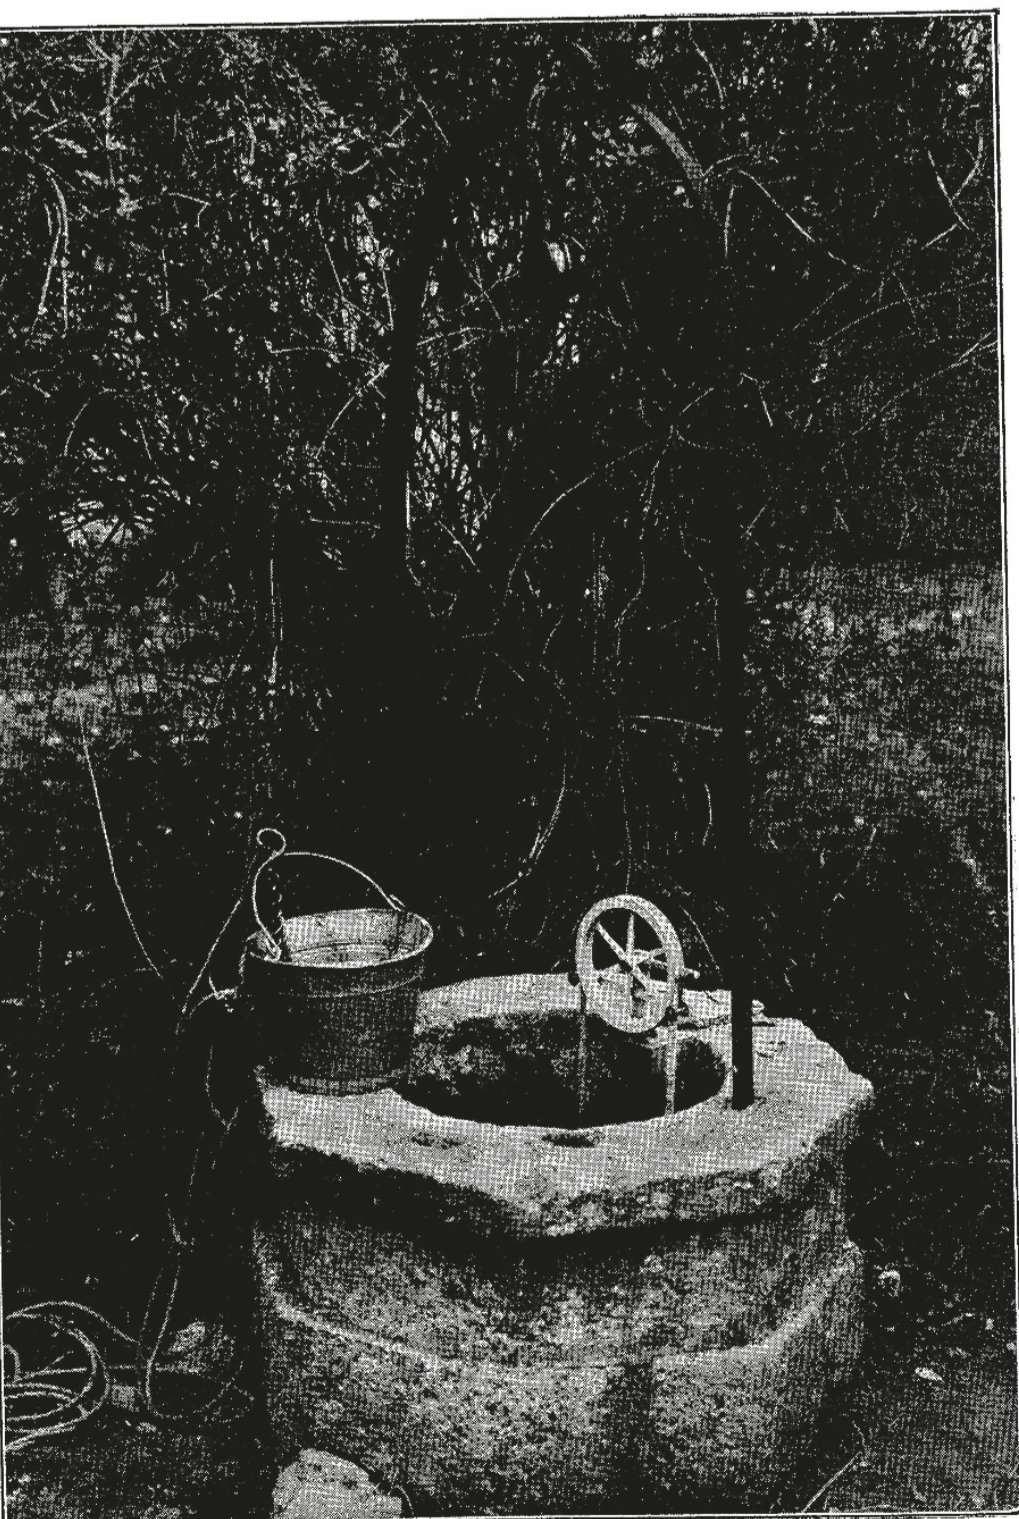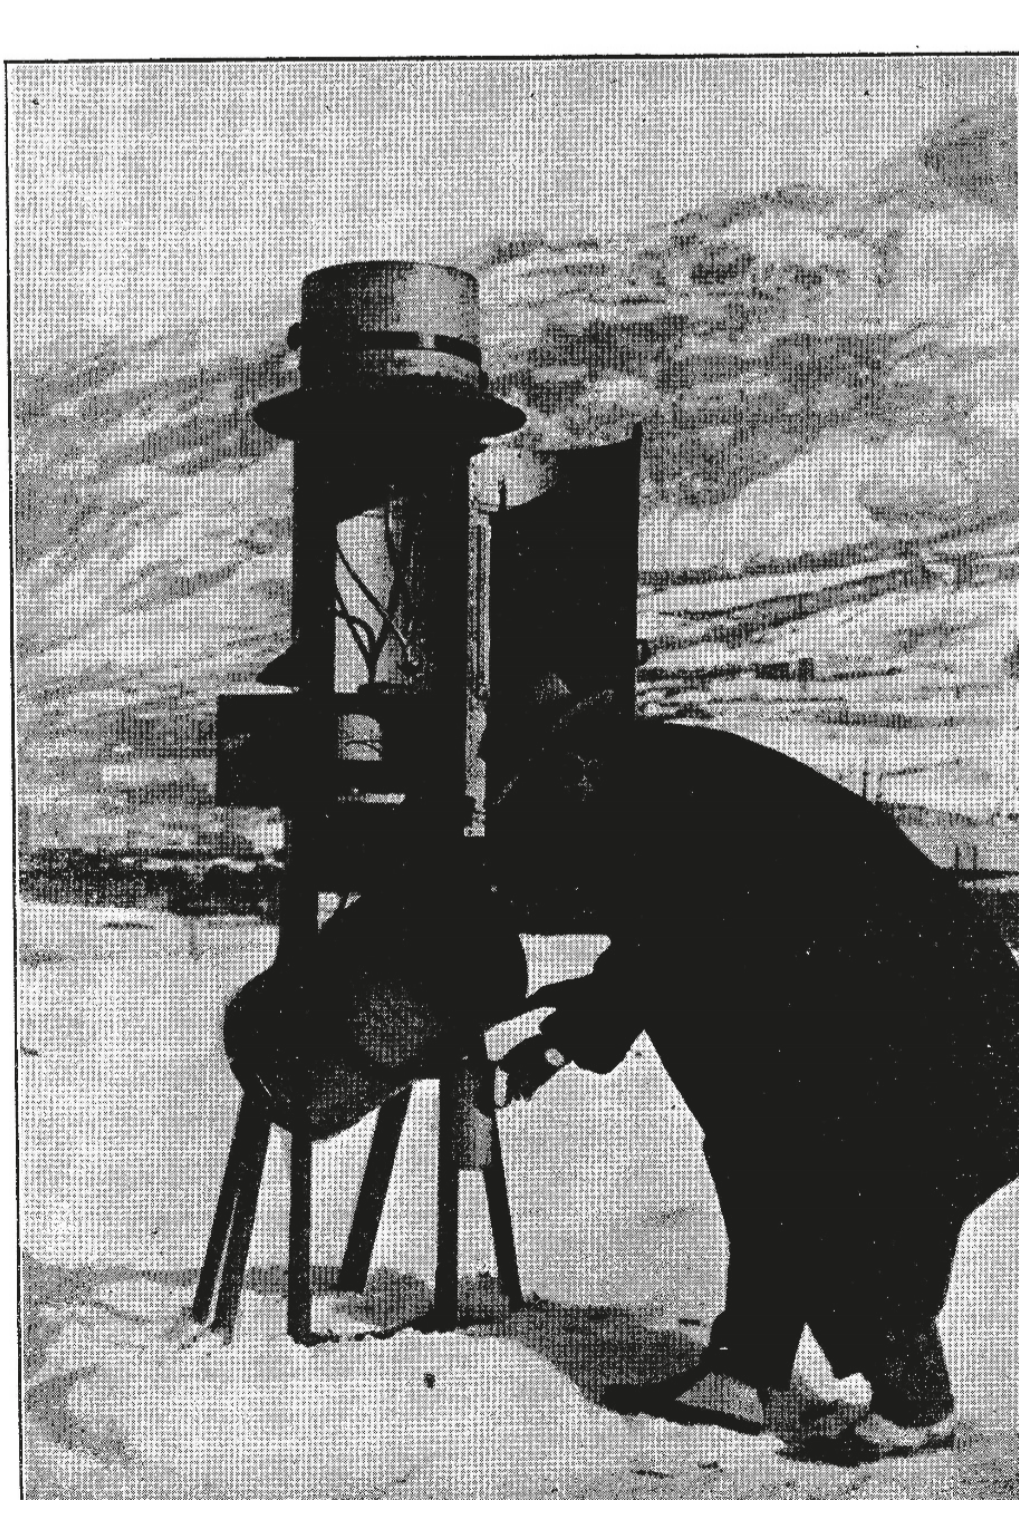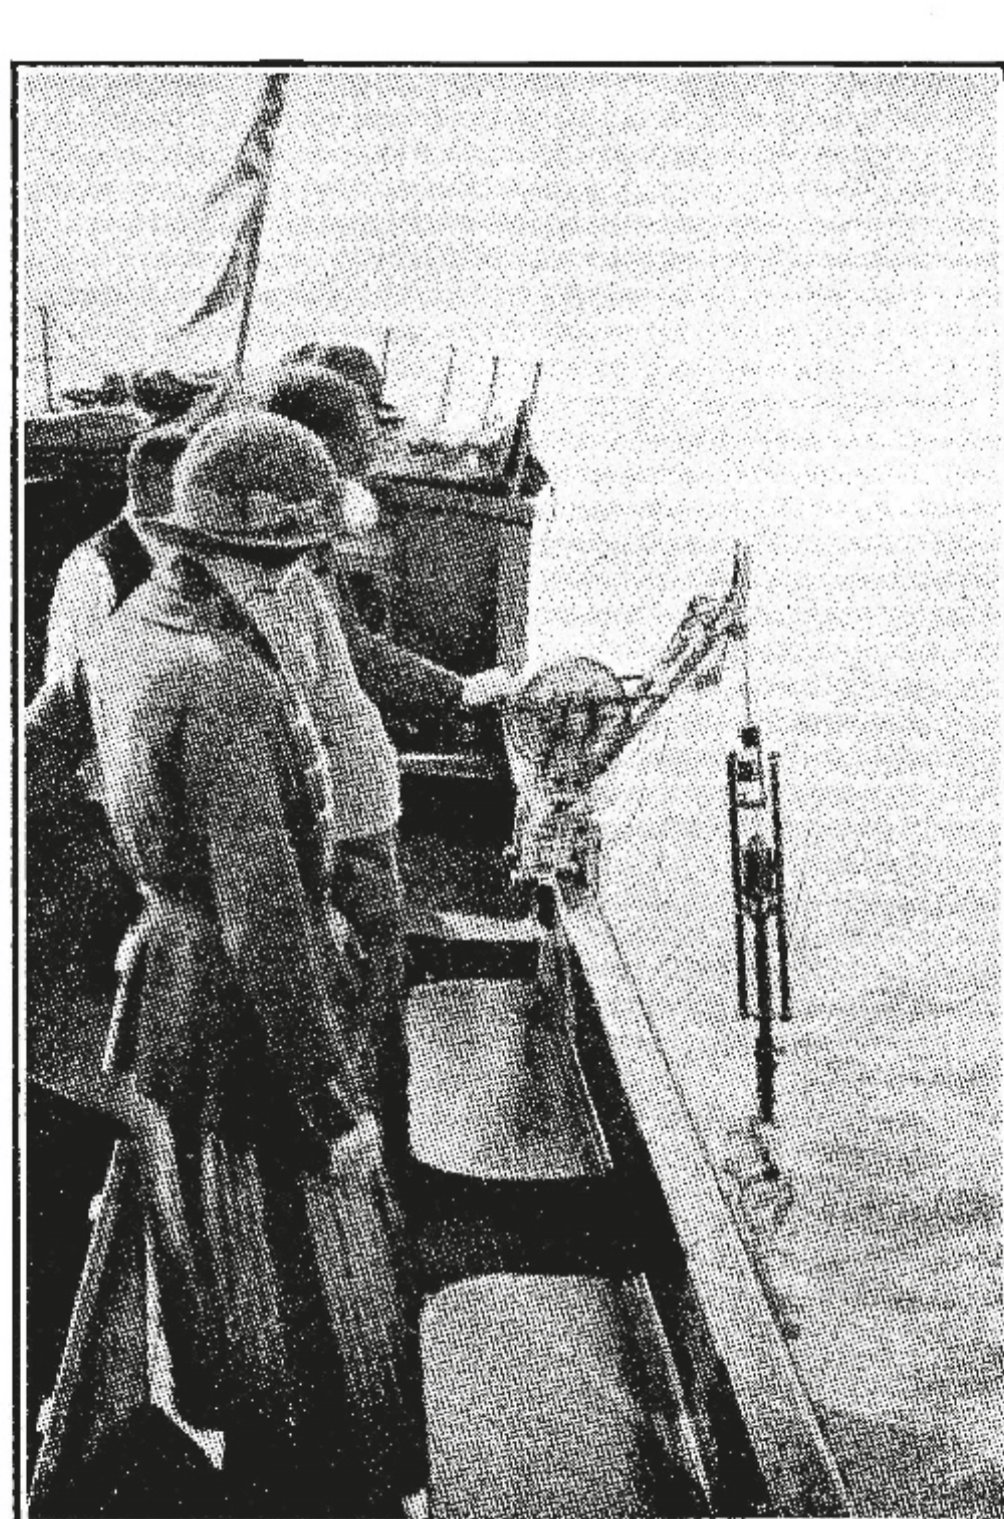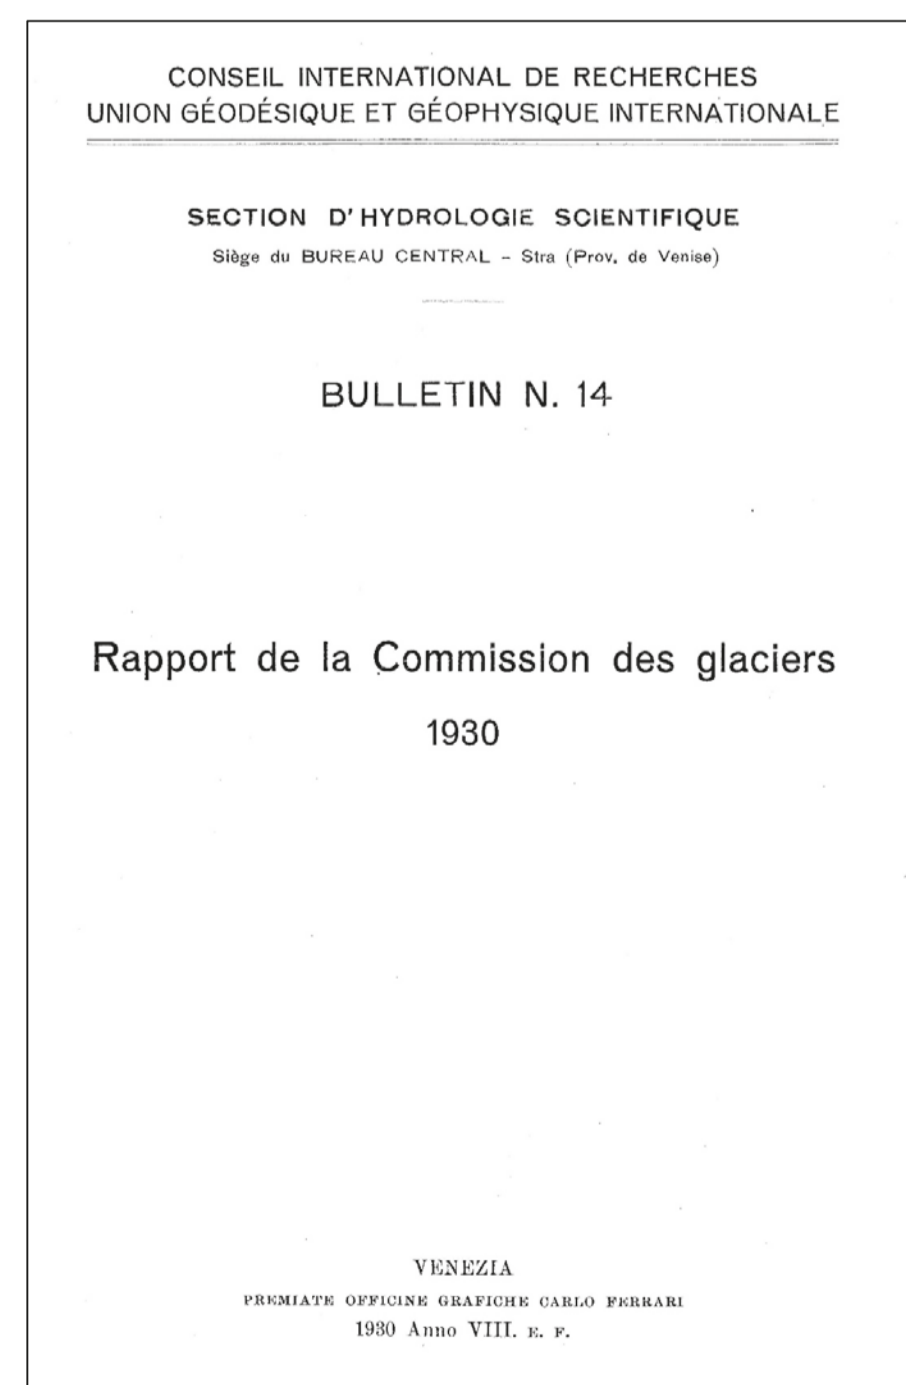

16

Variations de longueur des glaciers des Alpes suisses, en mètres.

17

| Glaciers         | 1913/14 | 1914/15 | 1915/16 | 1916/17 | 1917/18 | 1918/19 | 1919/20 | 1920/21 | 1921/22 | 1922/23 | 1923/24 | 1924/25 | 1925/26 | 1926/27 | 1927/28 |
|------------------|---------|---------|---------|---------|---------|---------|---------|---------|---------|---------|---------|---------|---------|---------|---------|
| Pieds Plin-Nirée | 42      | 2       | 2       | 6       | 1       | 21      | 19      | 10      | 7       | 23      | 0       | 19      | 16      | 16      | 16      |
| Pratig           | 12      | 12      | 12      | 12      | 12      | 12      | 12      | 12      | 12      | 12      | 12      | 12      | 12      | 12      | 12      |
| Sec. Borge       | 5       | 5       | 5       | 5       | 5       | 5       | 5       | 5       | 5       | 5       | 5       | 5       | 5       | 5       | 5       |
| Kaltwasser       | 0       | 0       | 0       | 0       | 0       | 0       | 0       | 0       | 0       | 0       | 0       | 0       | 0       | 0       | 0       |
| Gilma            | 0       | 0       | 0       | 0       | 0       | 0       | 0       | 0       | 0       | 0       | 0       | 0       | 0       | 0       | 0       |
| Yalovec          | 0       | 0       | 0       | 0       | 0       | 0       | 0       | 0       | 0       | 0       | 0       | 0       | 0       | 0       | 0       |
| Dard             | 0       | 0       | 0       | 0       | 0       | 0       | 0       | 0       | 0       | 0       | 0       | 0       | 0       | 0       | 0       |
| Snowa            | 0       | 0       | 0       | 0       | 0       | 0       | 0       | 0       | 0       | 0       | 0       | 0       | 0       | 0       | 0       |
| Thalidone        | 0       | 0       | 0       | 0       | 0       | 0       | 0       | 0       | 0       | 0       | 0       | 0       | 0       | 0       | 0       |
| Gratshaus        | 0       | 0       | 0       | 0       | 0       | 0       | 0       | 0       | 0       | 0       | 0       | 0       | 0       | 0       | 0       |
| Jagl             | 0       | 0       | 0       | 0       | 0       | 0       | 0       | 0       | 0       | 0       | 0       | 0       | 0       | 0       | 0       |
| Ottens           | 0       | 0       | 0       | 0       | 0       | 0       | 0       | 0       | 0       | 0       | 0       | 0       | 0       | 0       | 0       |
| Muselman         | 0       | 0       | 0       | 0       | 0       | 0       | 0       | 0       | 0       | 0       | 0       | 0       | 0       | 0       | 0       |
| Brenay           | 0       | 0       | 0       | 0       | 0       | 0       | 0       | 0       | 0       | 0       | 0       | 0       | 0       | 0       | 0       |
| Pierreda         | 0       | 0       | 0       | 0       | 0       | 0       | 0       | 0       | 0       | 0       | 0       | 0       | 0       | 0       | 0       |
| Star             | 0       | 0       | 0       | 0       | 0       | 0       | 0       | 0       | 0       | 0       | 0       | 0       | 0       | 0       | 0       |
| Fall             | 0       | 0       | 0       | 0       | 0       | 0       | 0       | 0       | 0       | 0       | 0       | 0       | 0       | 0       | 0       |
| Holwand          | 0       | 0       | 0       | 0       | 0       | 0       | 0       | 0       | 0       | 0       | 0       | 0       | 0       | 0       | 0       |
| Bon              | 0       | 0       | 0       | 0       | 0       | 0       | 0       | 0       | 0       | 0       | 0       | 0       | 0       | 0       | 0       |
| Sole (Salsola)   | 0       | 0       | 0       | 0       | 0       | 0       | 0       | 0       | 0       | 0       | 0       | 0       | 0       | 0       | 0       |
| Baltacheder      | 0       | 0       | 0       | 0       | 0       | 0       | 0       | 0       | 0       | 0       | 0       | 0       | 0       | 0       | 0       |
| Lang             | 0       | 0       | 0       | 0       | 0       | 0       | 0       | 0       | 0       | 0       | 0       | 0       | 0       | 0       | 0       |
| Ottal            | 0       | 0       | 0       | 0       | 0       | 0       | 0       | 0       | 0       | 0       | 0       | 0       | 0       | 0       | 0       |
| Seewiesen        | 0       | 0       | 0       | 0       | 0       | 0       | 0       | 0       | 0       | 0       | 0       | 0       | 0       | 0       | 0       |
| Côte-Rhône       | 0       | 0       | 0       | 0       | 0       | 0       | 0       | 0       | 0       | 0       | 0       | 0       | 0       | 0       | 0       |
| Tandlet          | 0       | 0       | 0       | 0       | 0       | 0       | 0       | 0       | 0       | 0       | 0       | 0       | 0       | 0       | 0       |
| Miklosh          | 0       | 0       | 0       | 0       | 0       | 0       | 0       | 0       | 0       | 0       | 0       | 0       | 0       | 0       | 0       |
| Holwand          | 0       | 0       | 0       | 0       | 0       | 0       | 0       | 0       | 0       | 0       | 0       | 0       | 0       | 0       | 0       |
| Kayser           | 0       | 0       | 0       | 0       | 0       | 0       | 0       | 0       | 0       | 0       | 0       | 0       | 0       | 0       | 0       |
| Bach             | 0       | 0       | 0       | 0       | 0       | 0       | 0       | 0       | 0       | 0       | 0       | 0       | 0       | 0       | 0       |

1931: IRC becomes ICSU, International Council of Scientific Unions

1933: the Section becomes the International Association of Scientific Hydrology

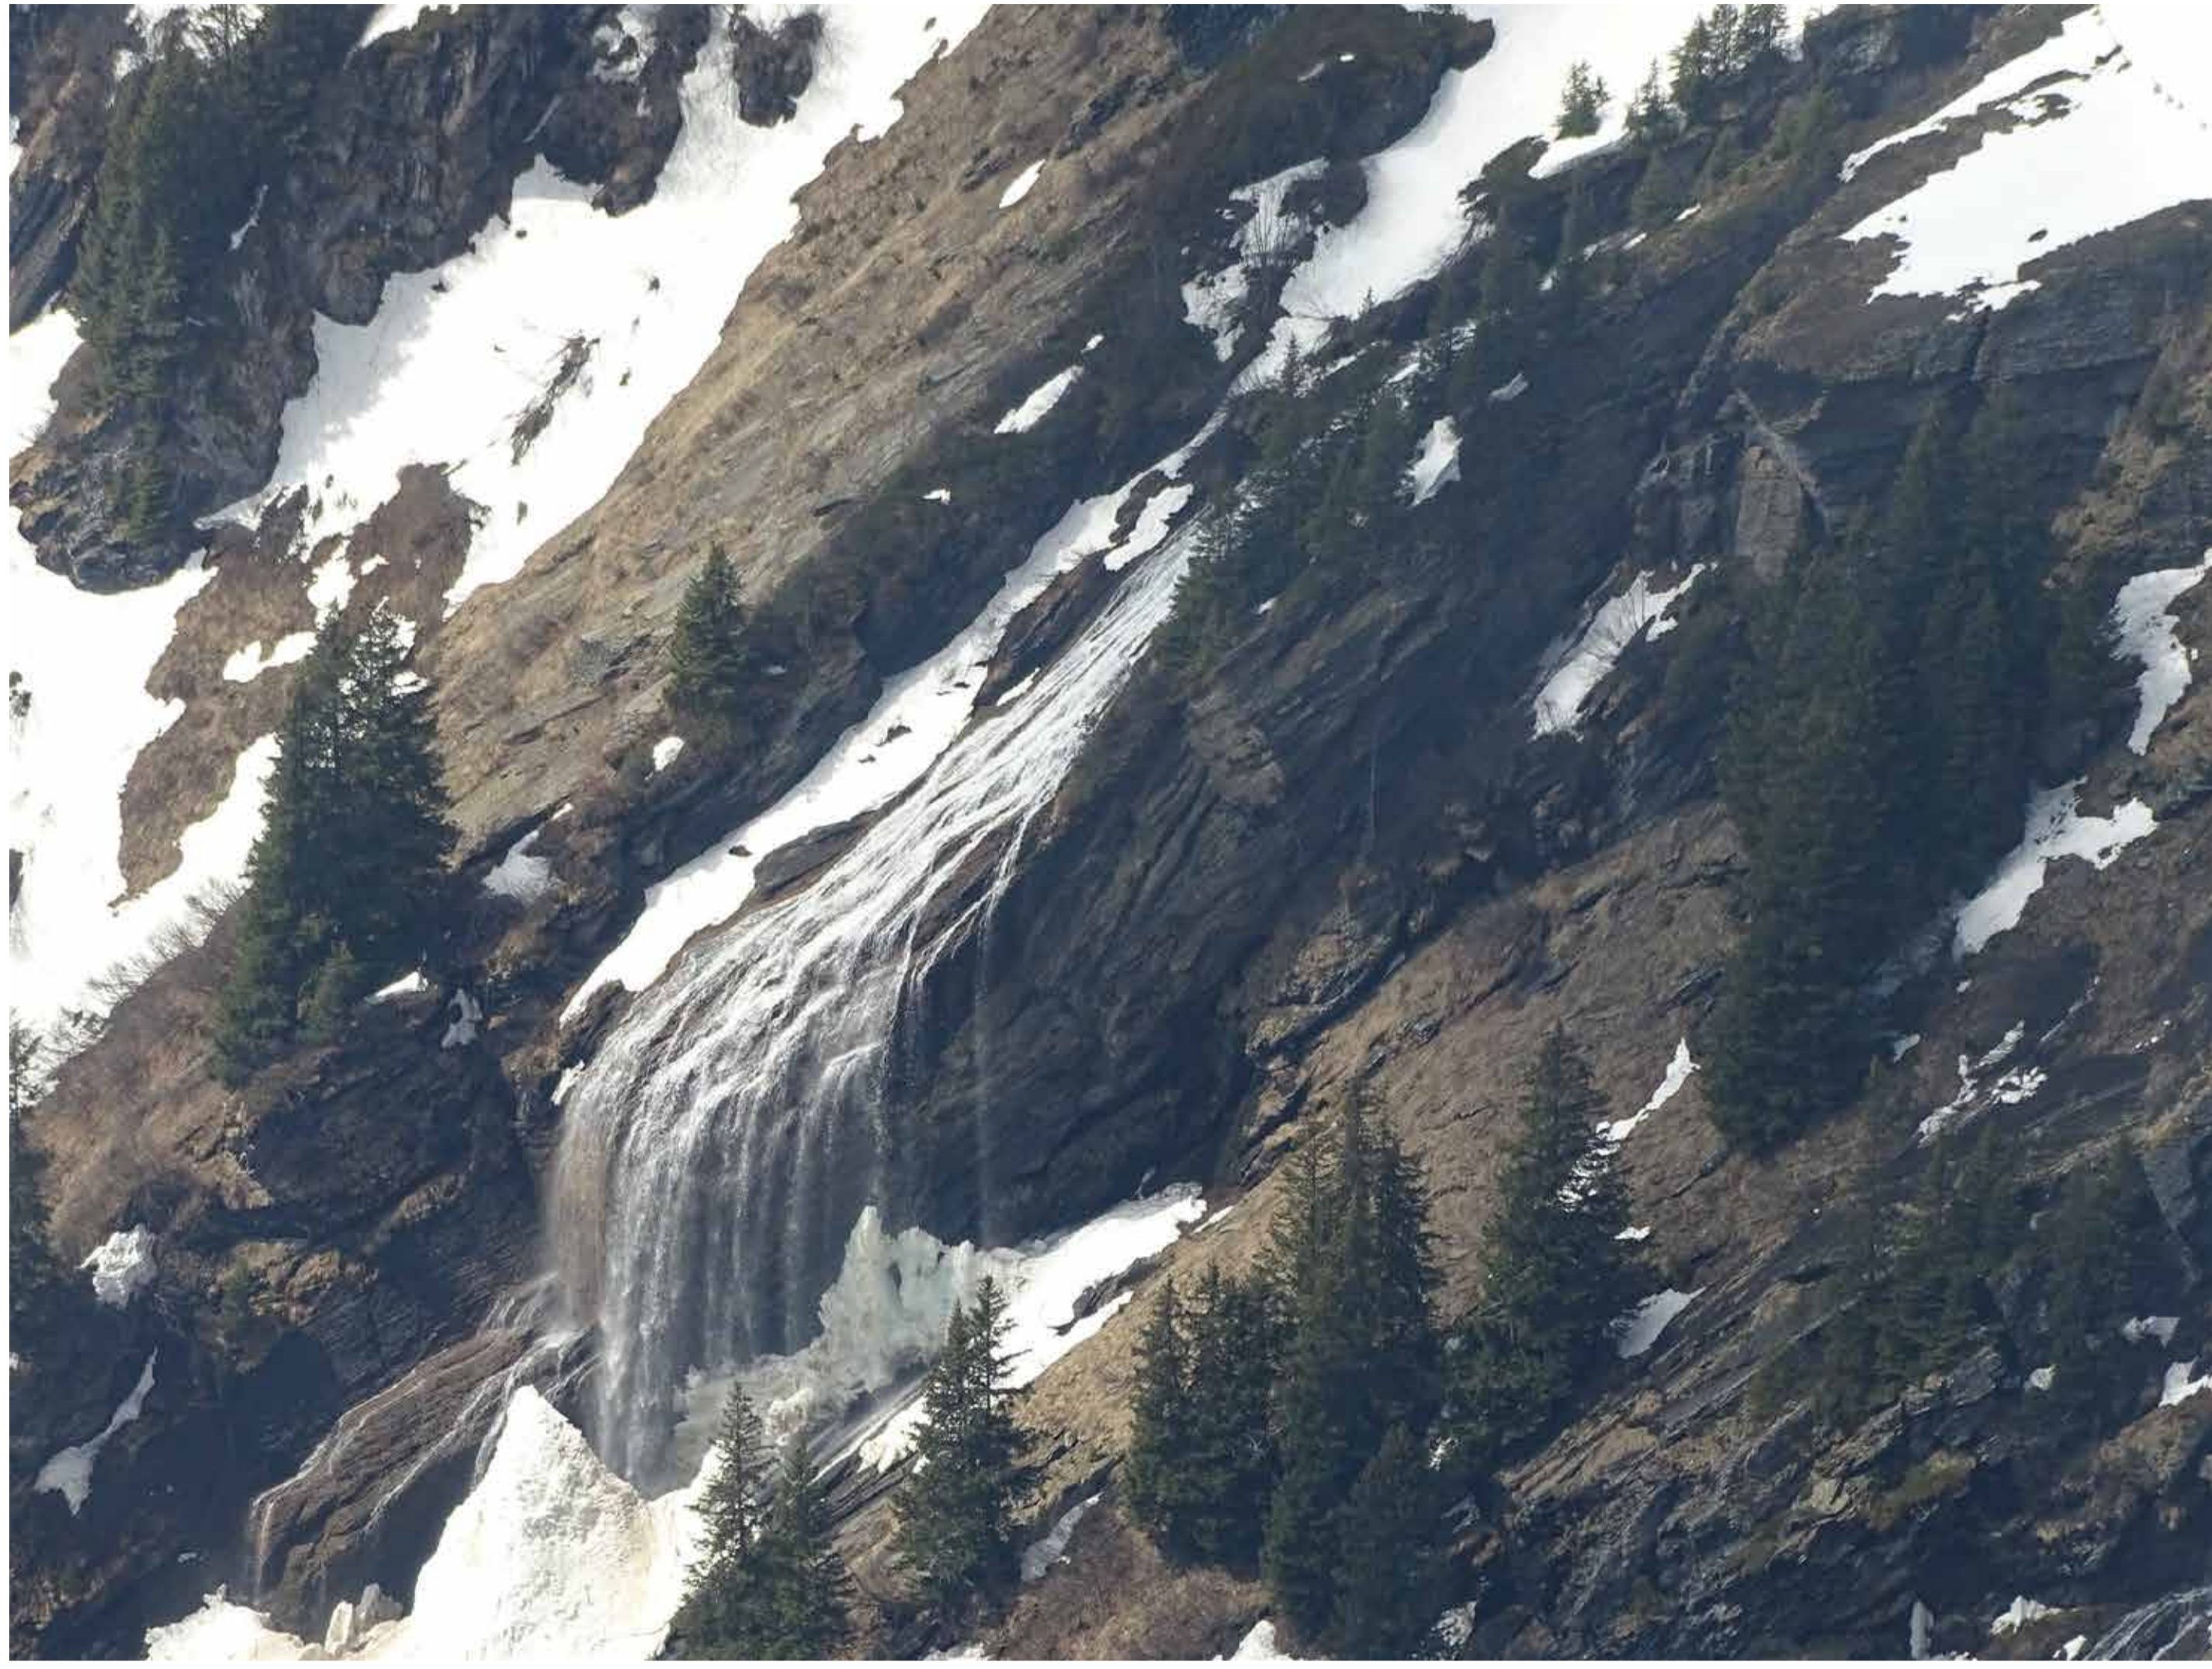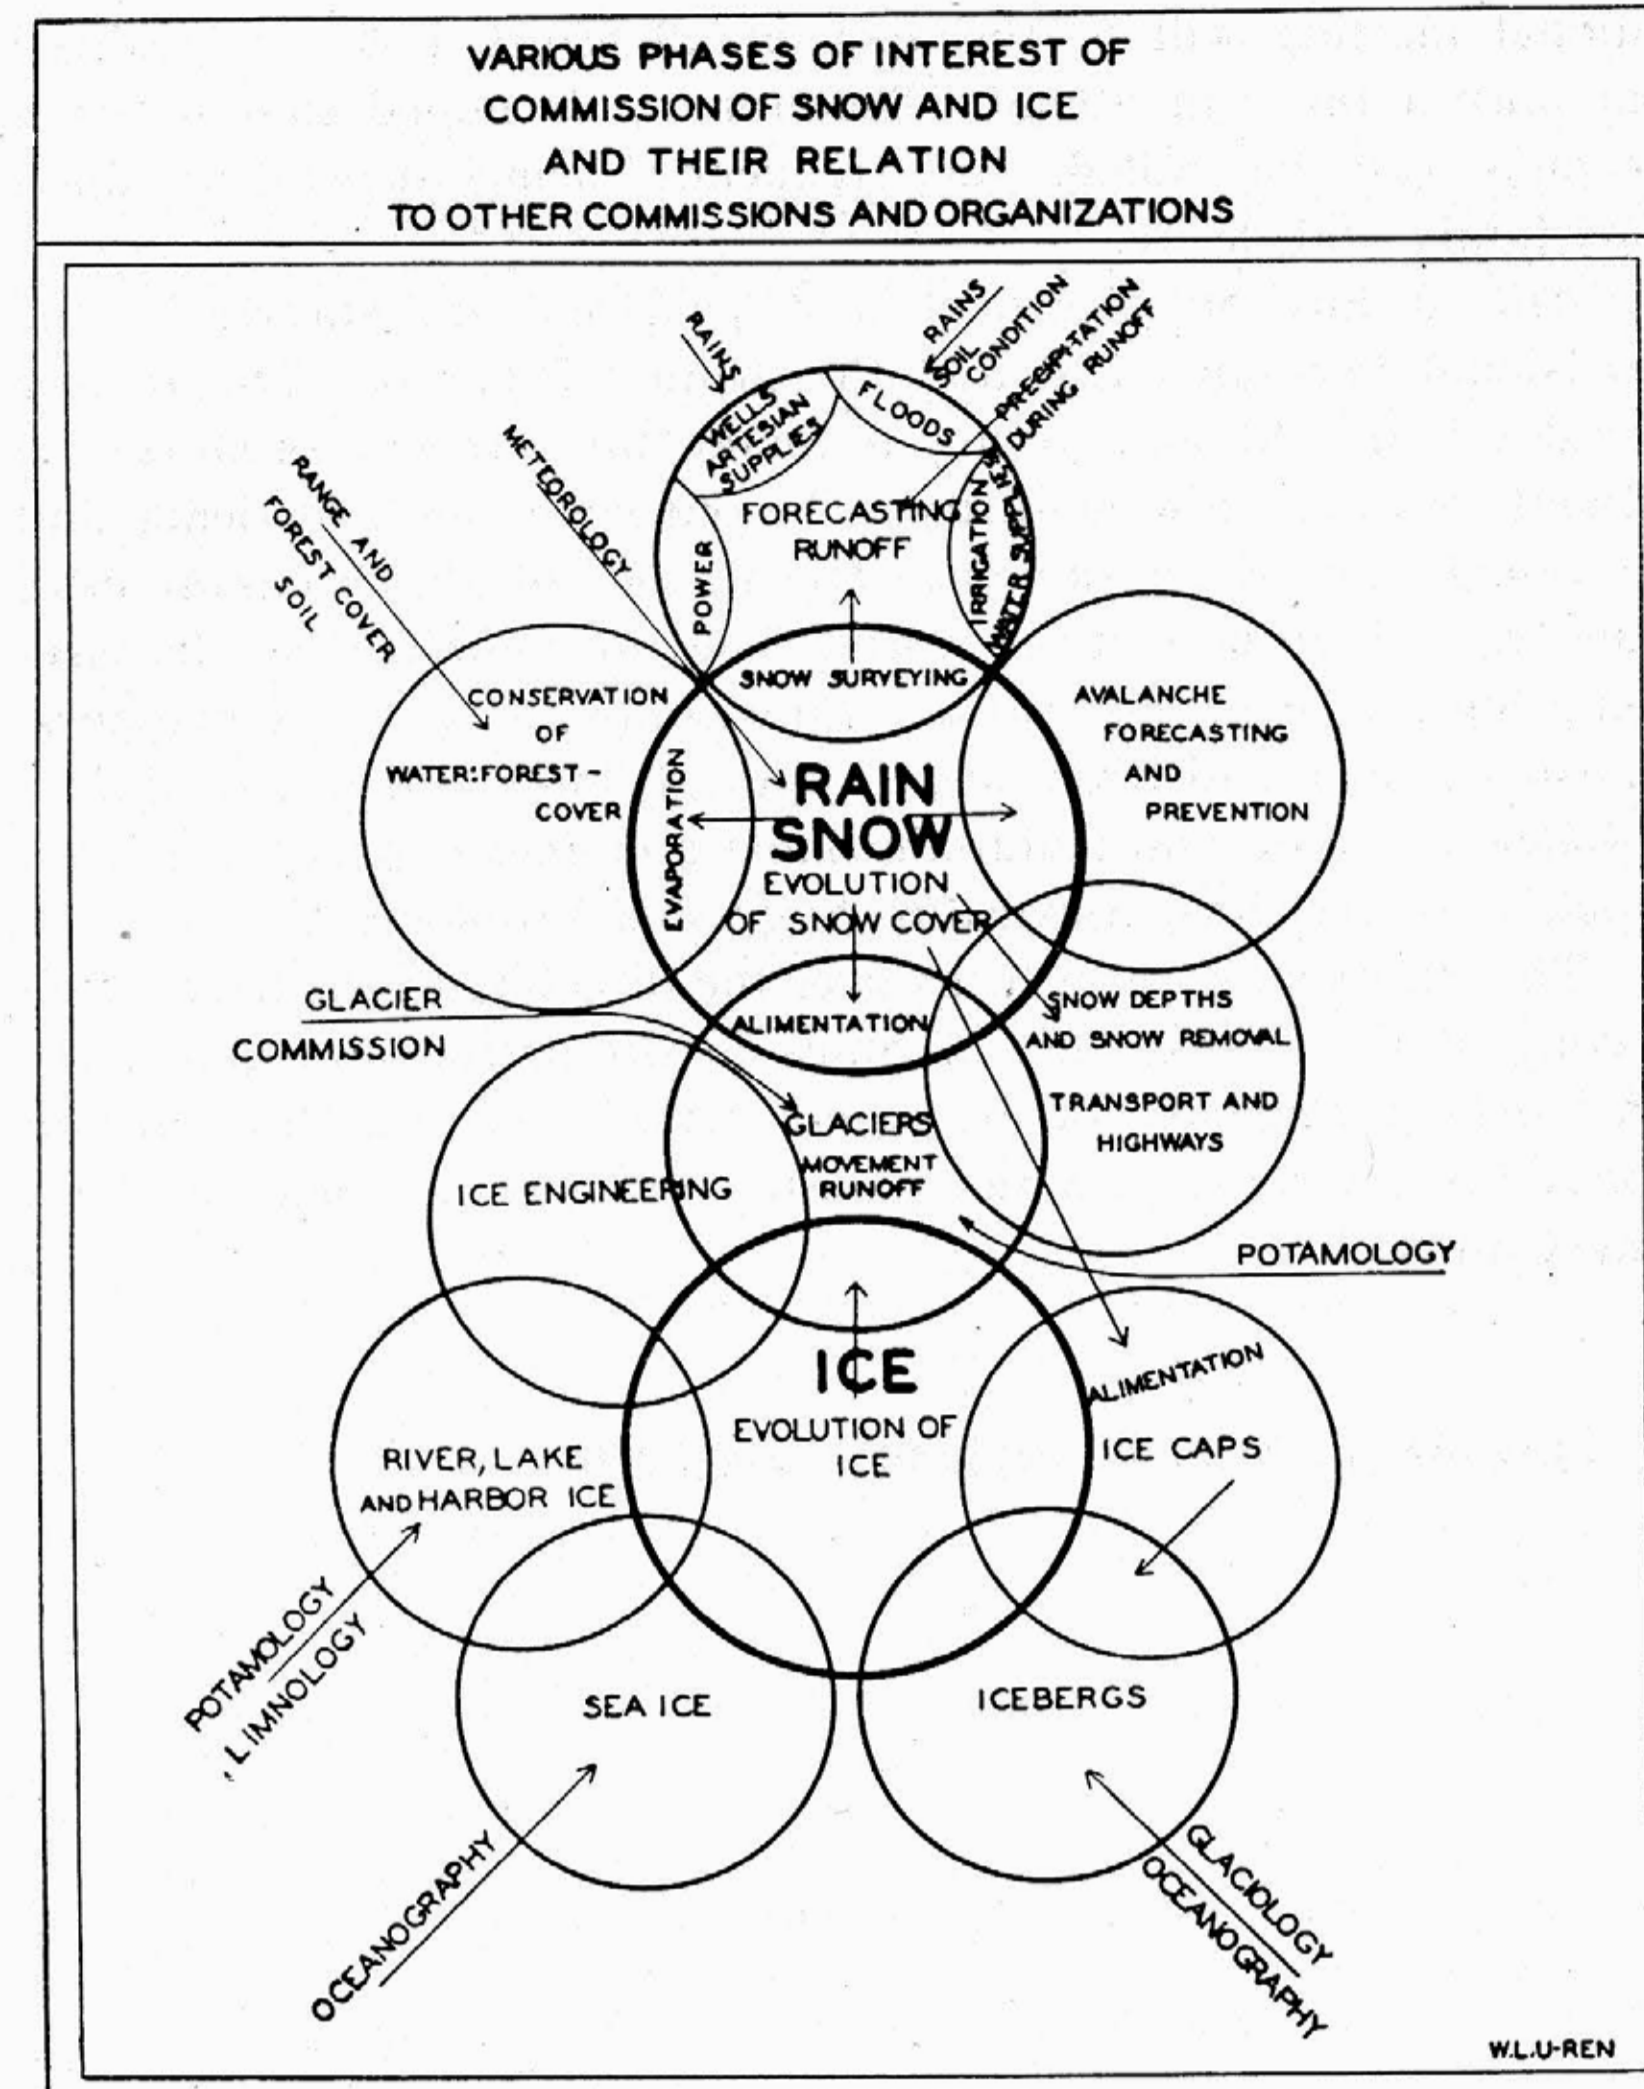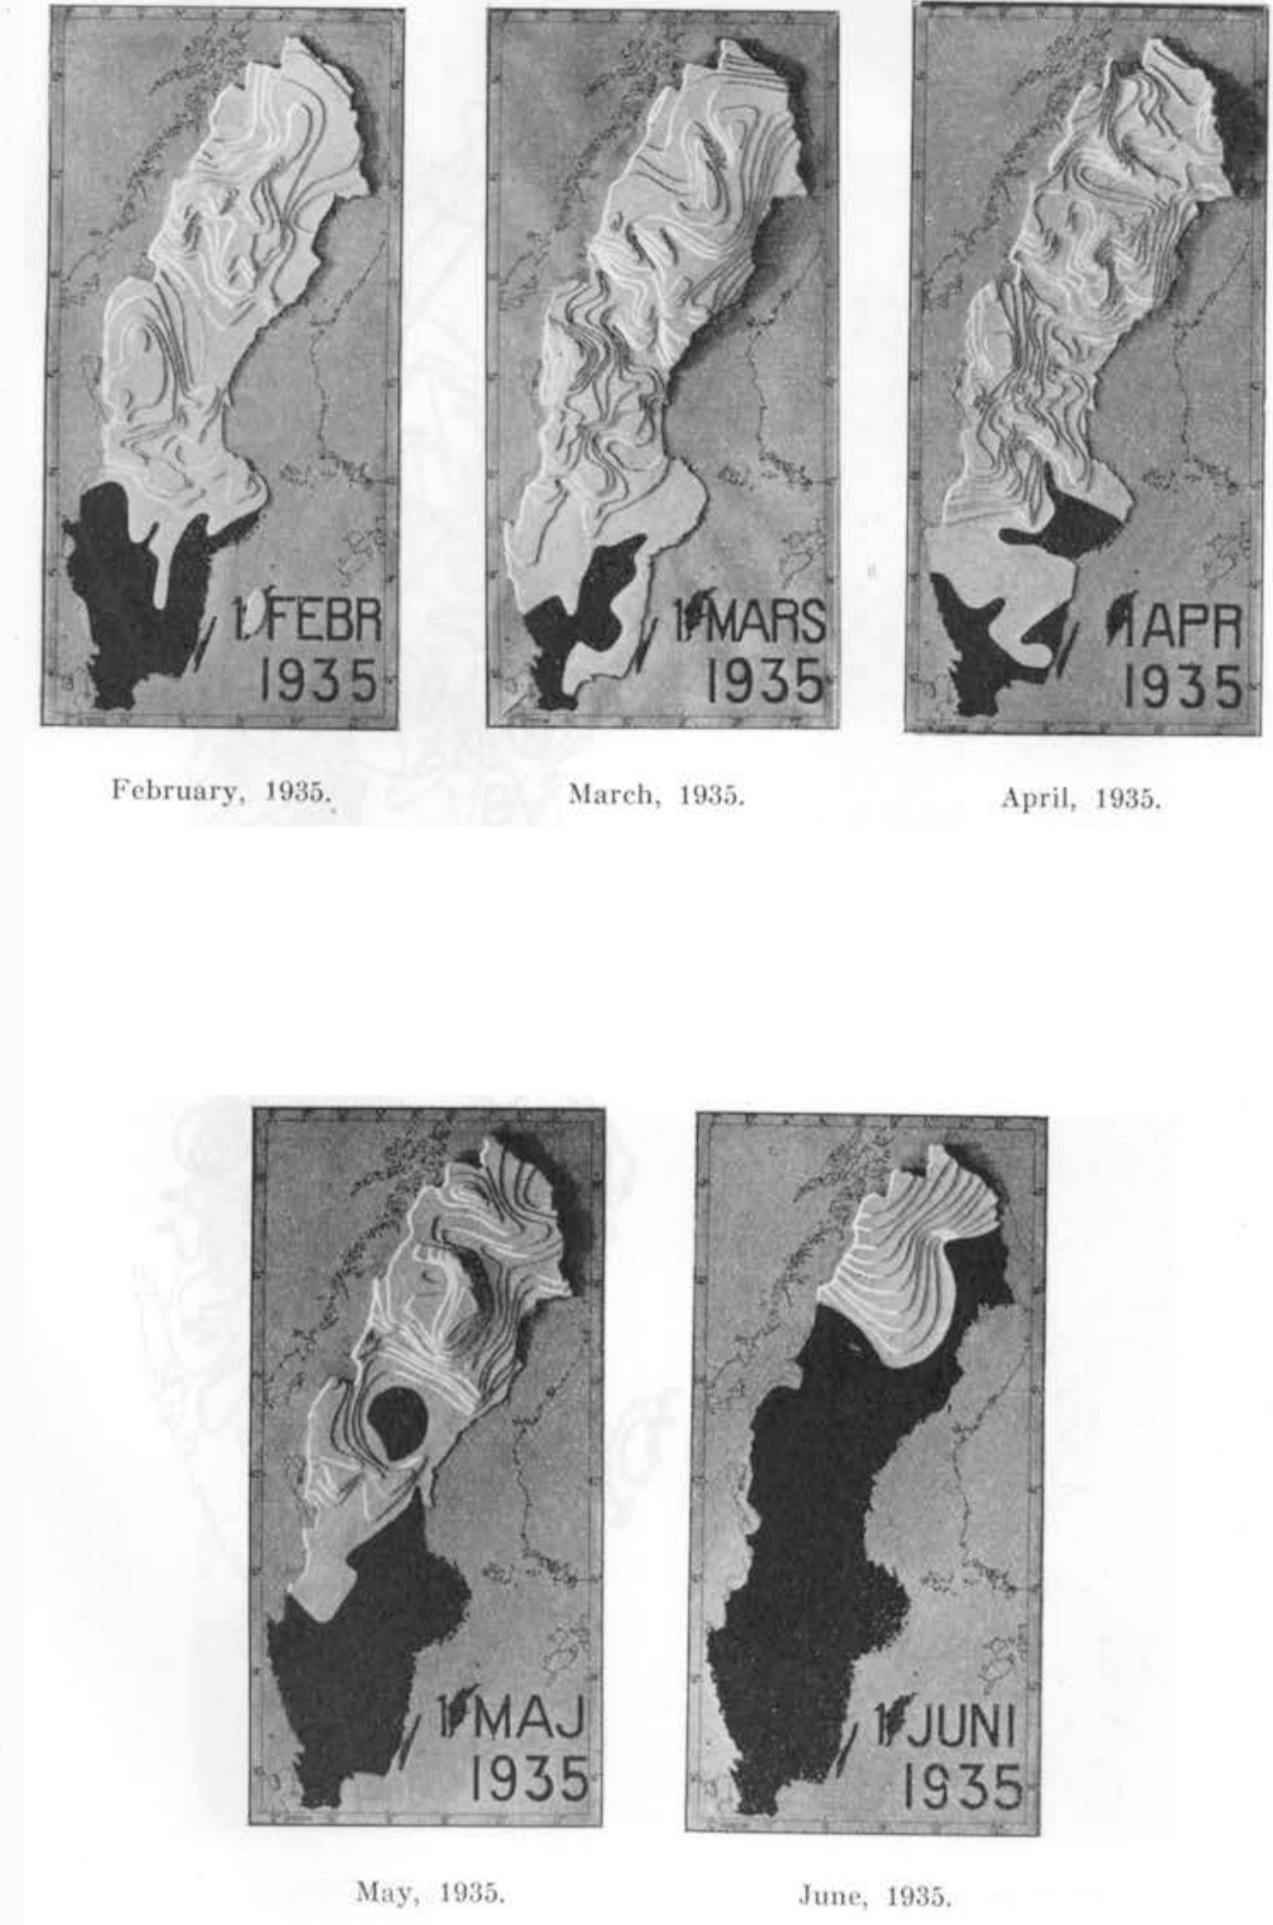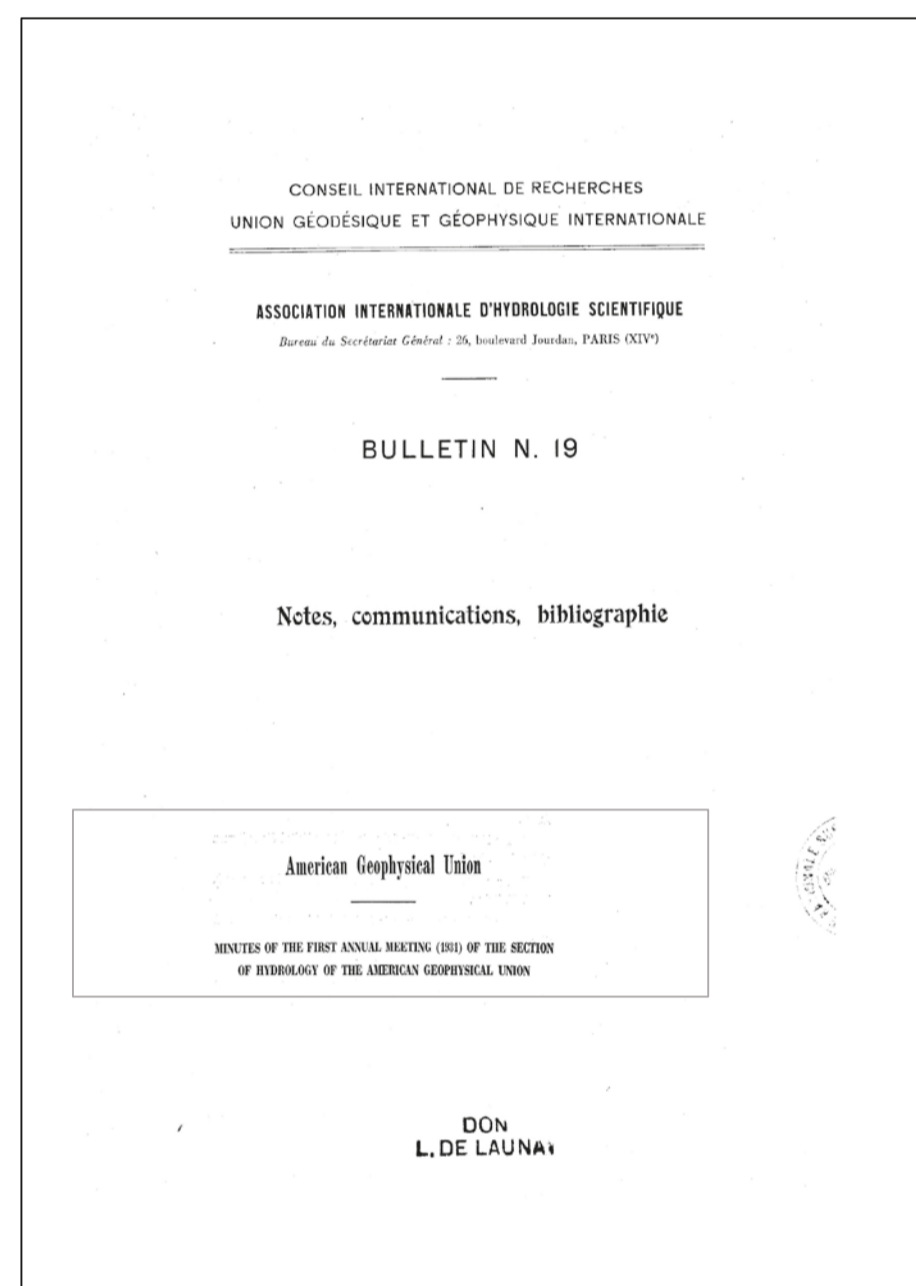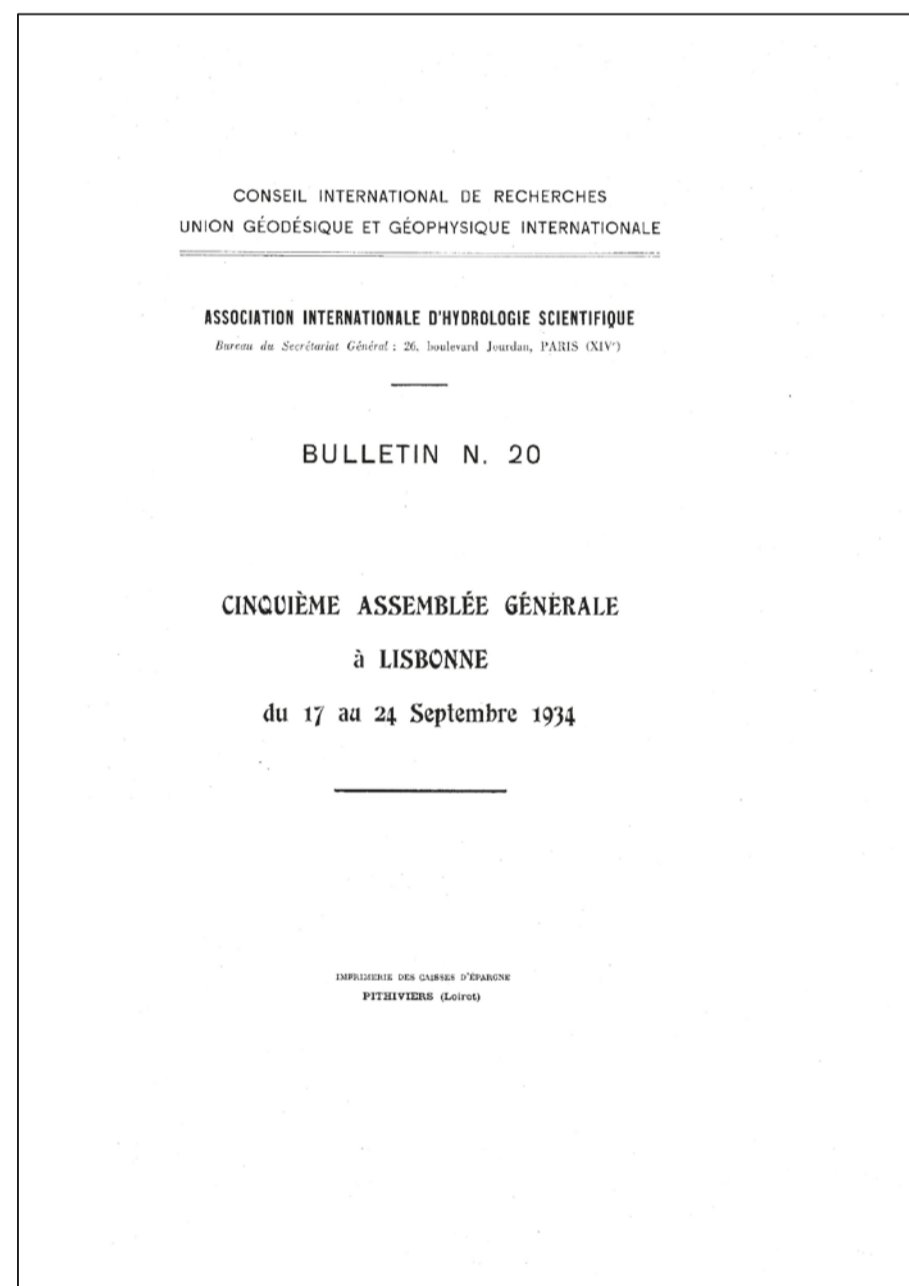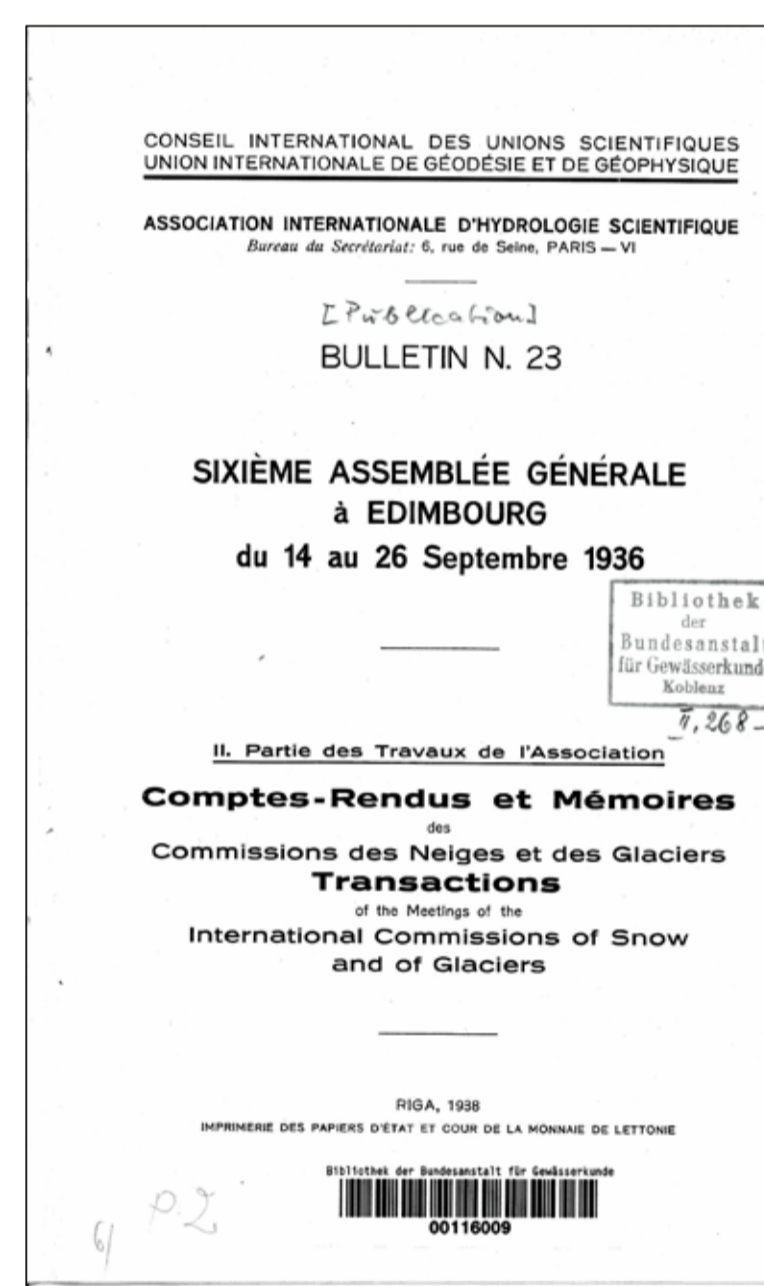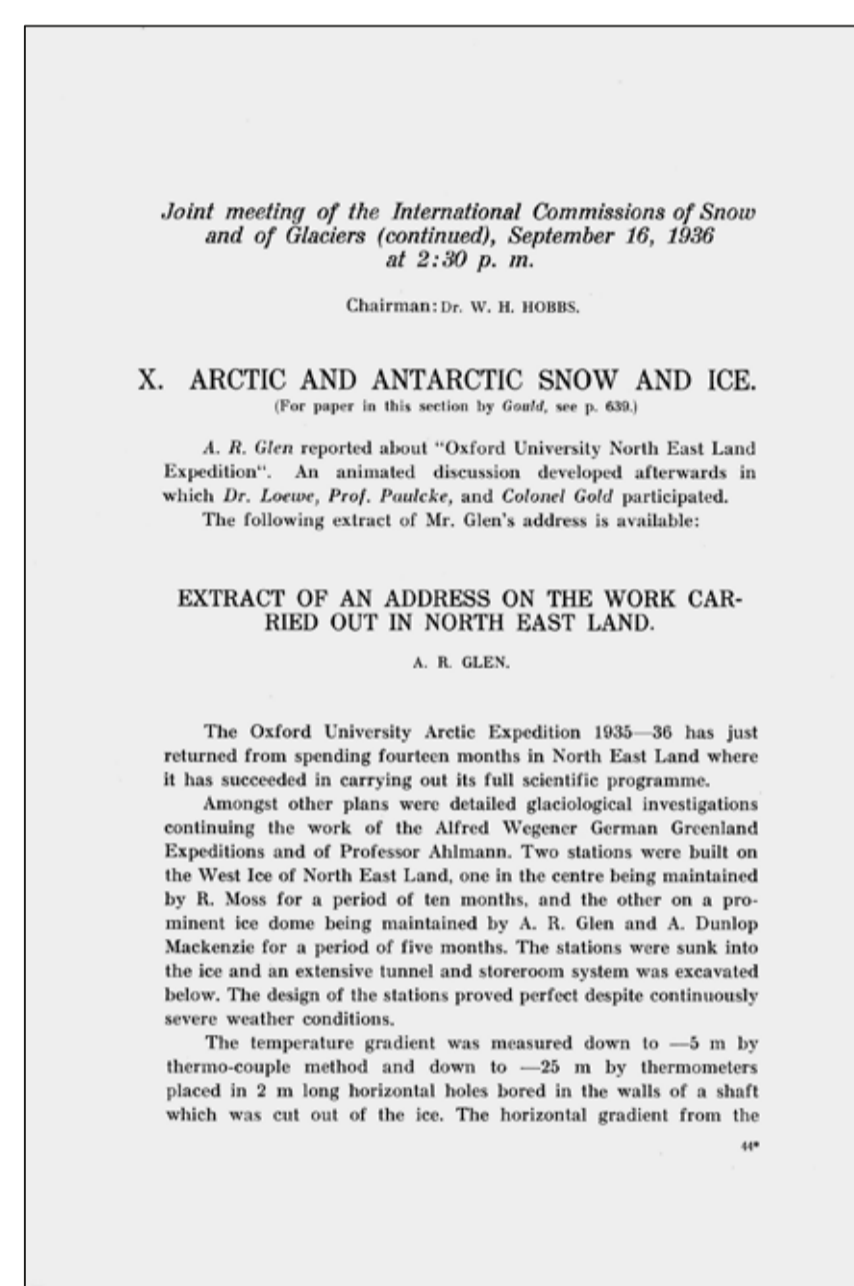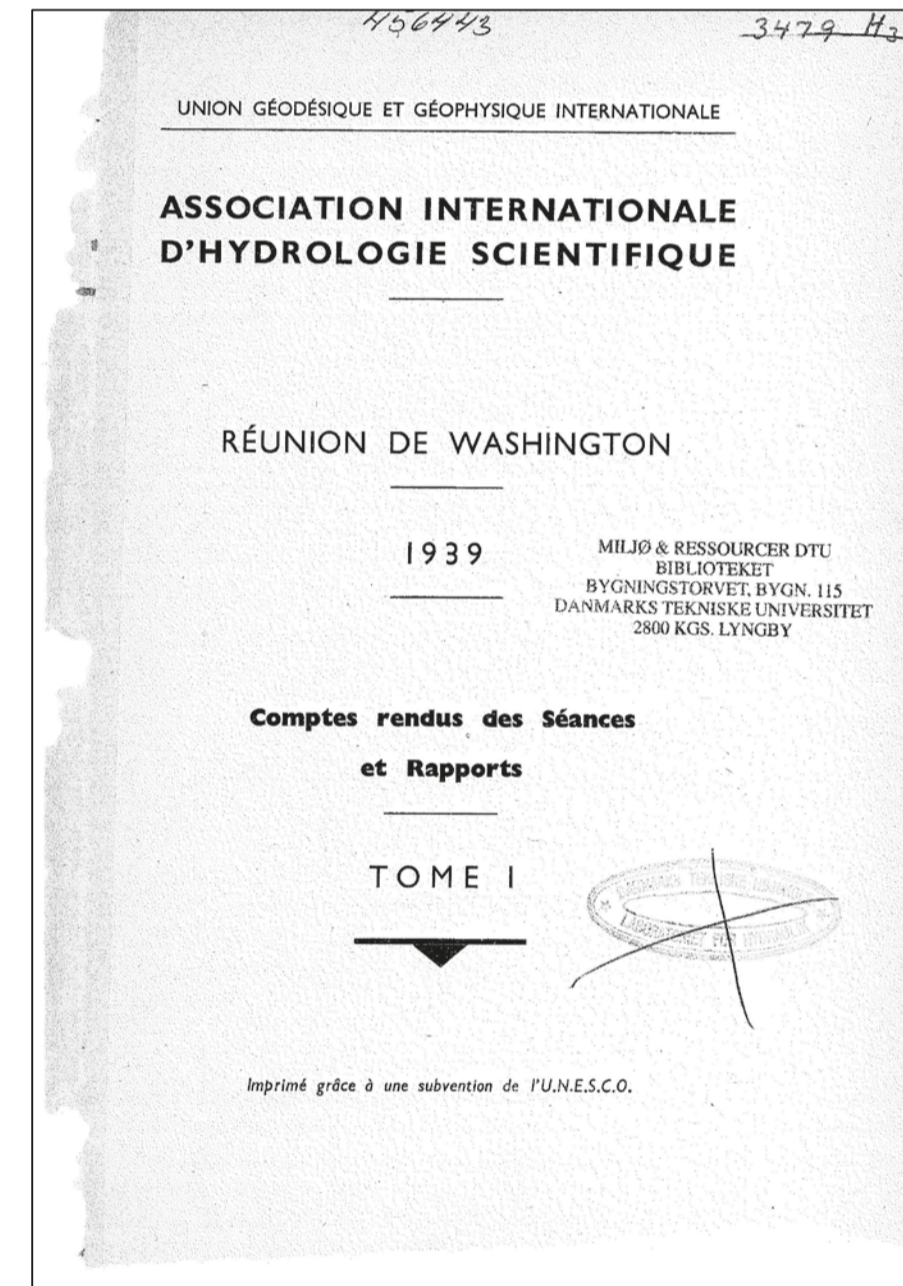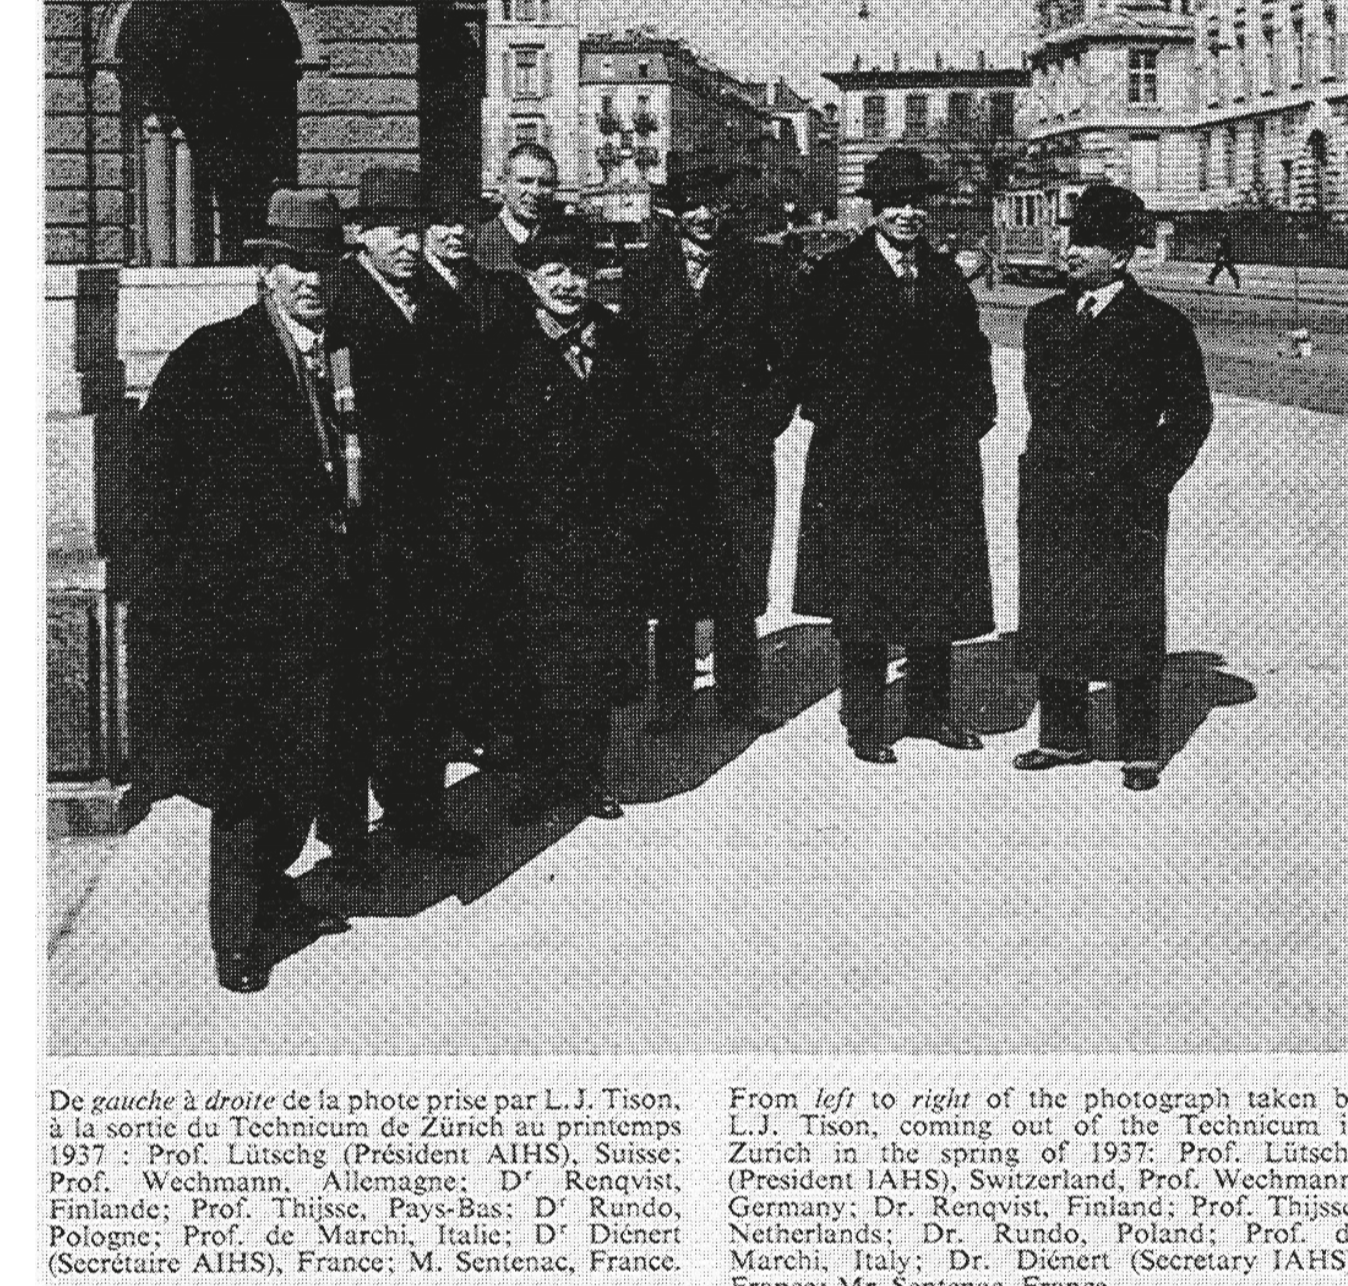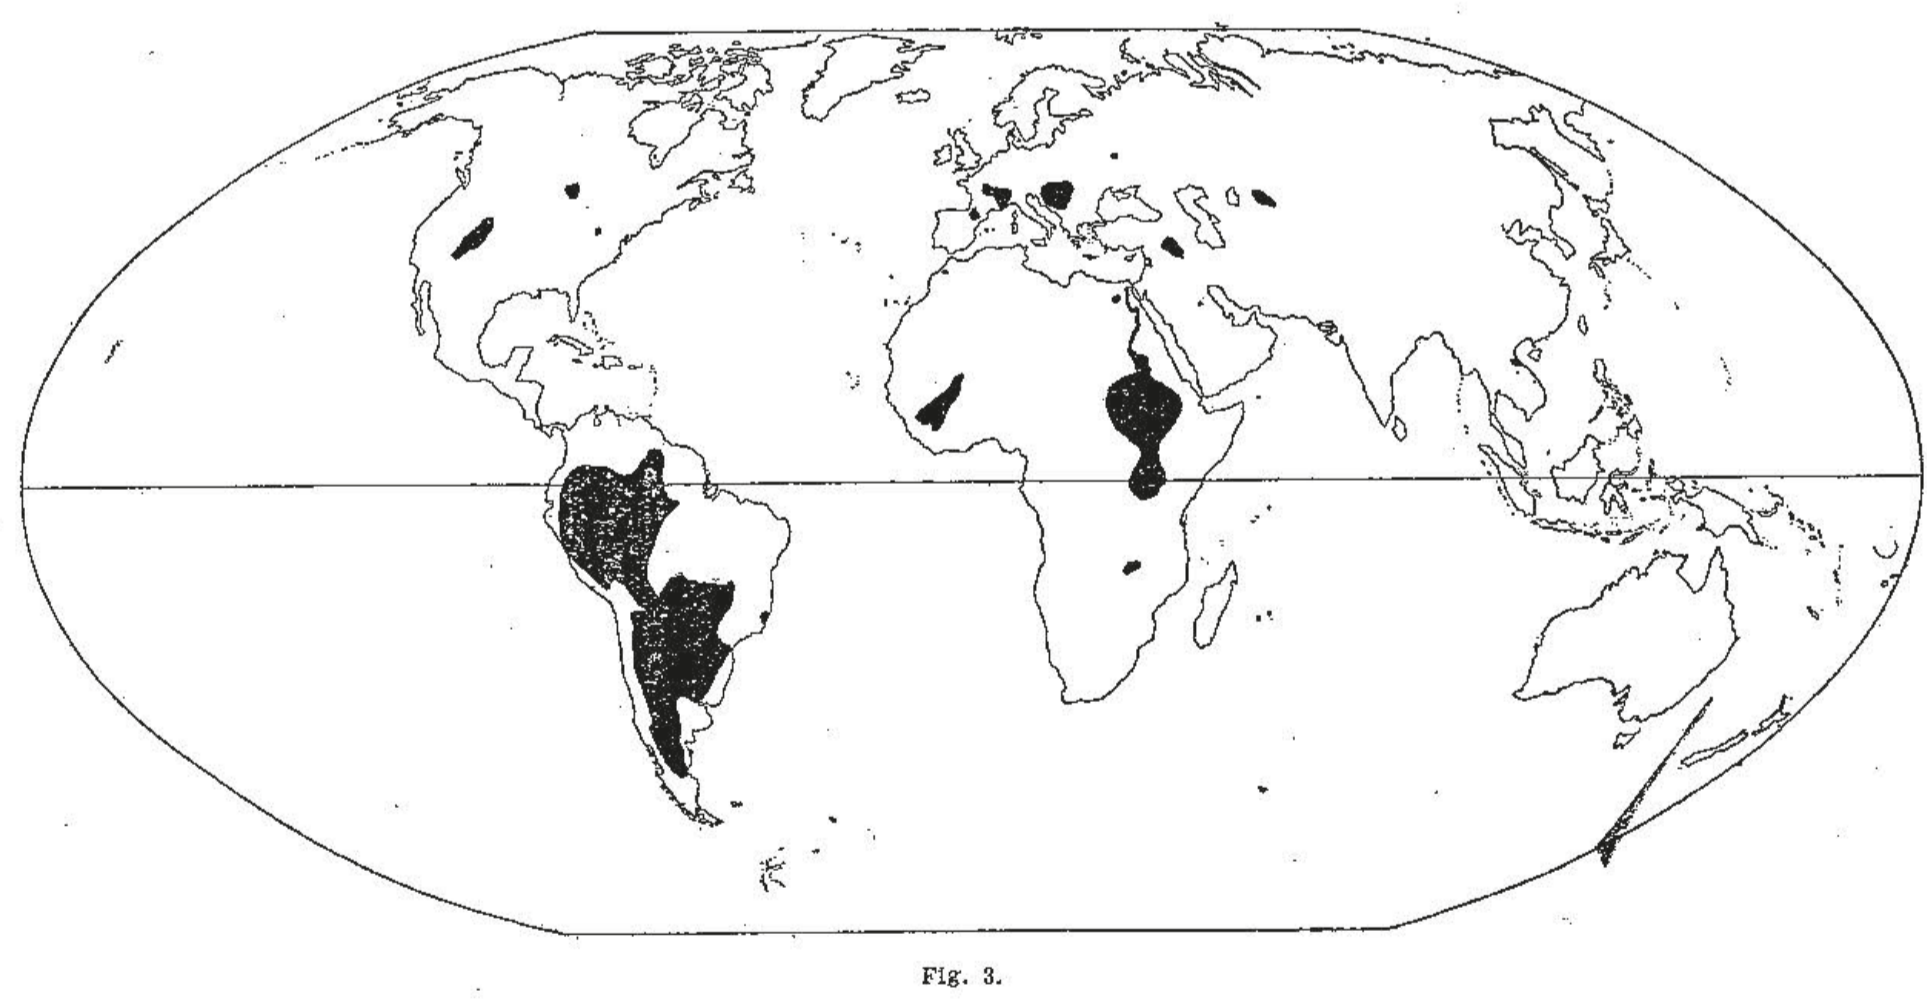

Fig. 3.

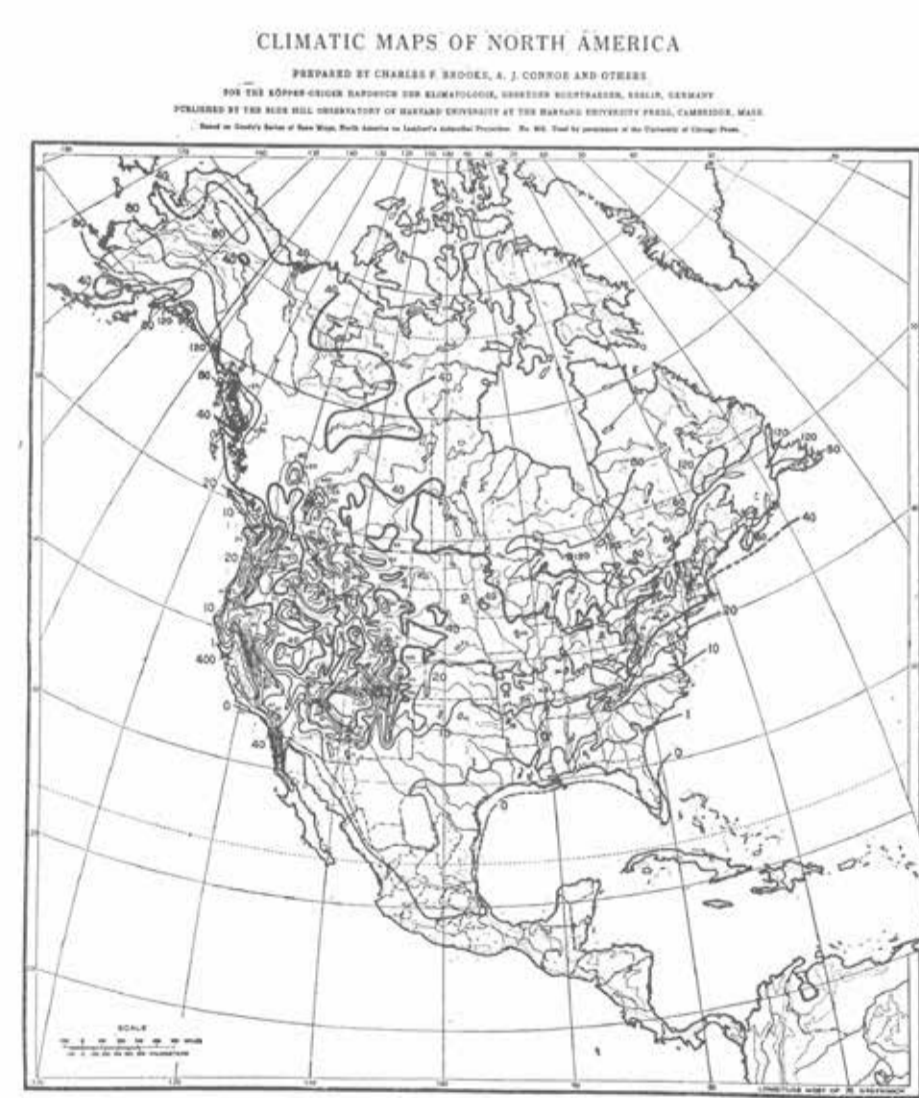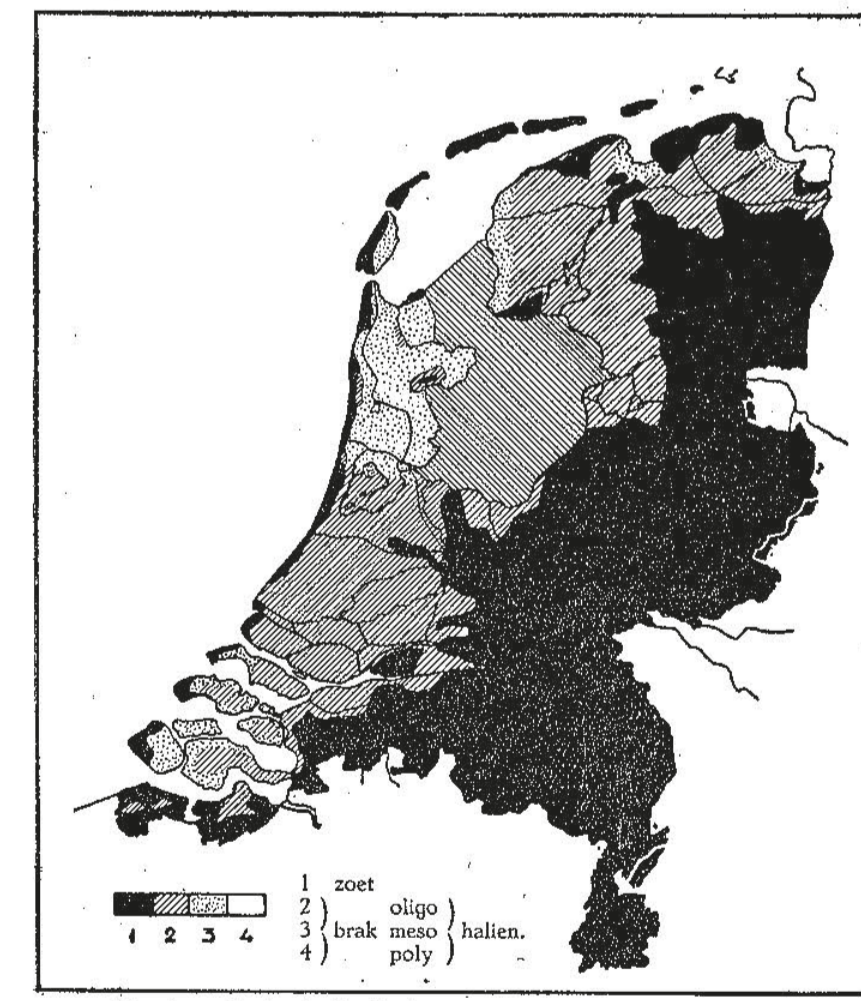

Fig. 4. — Statistical distribution of water resources in the Netherlands.

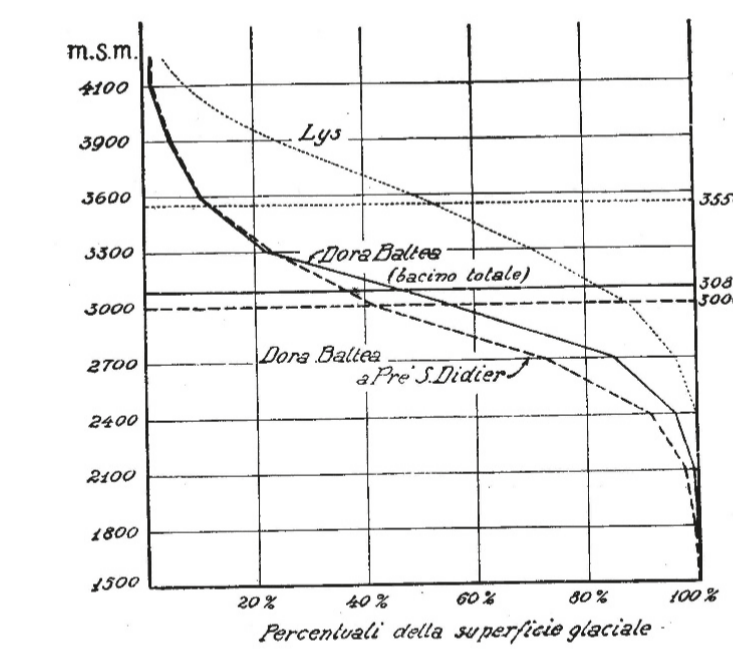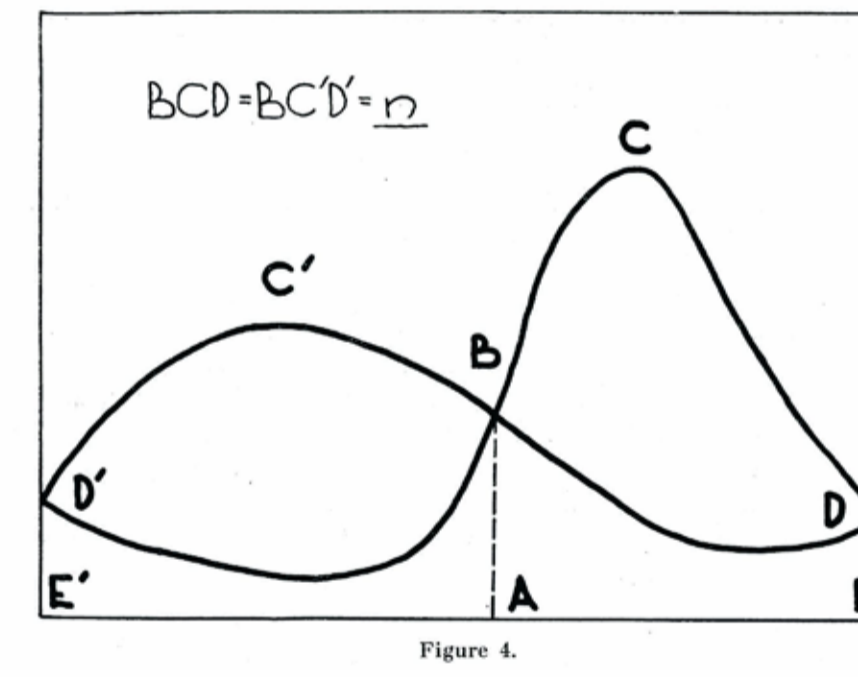

Figure 4.

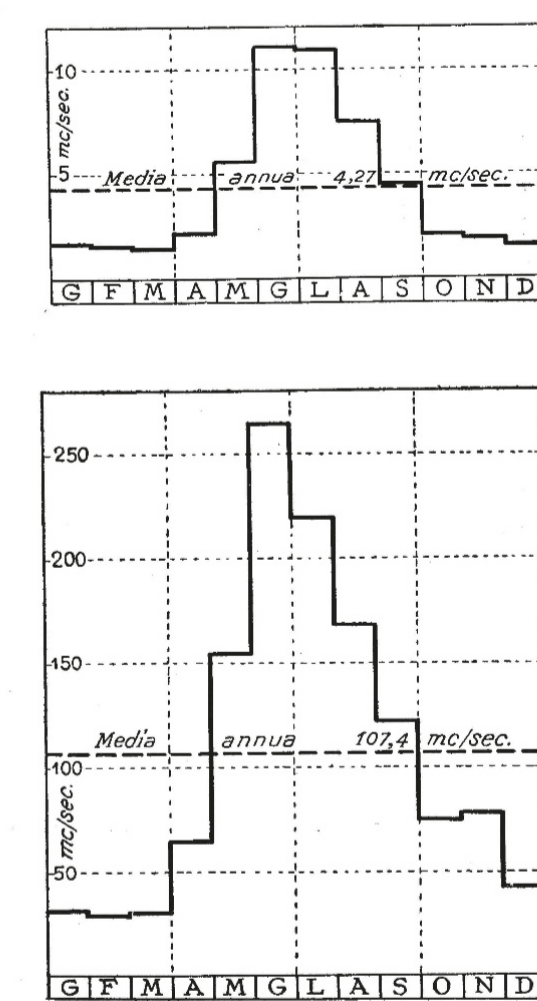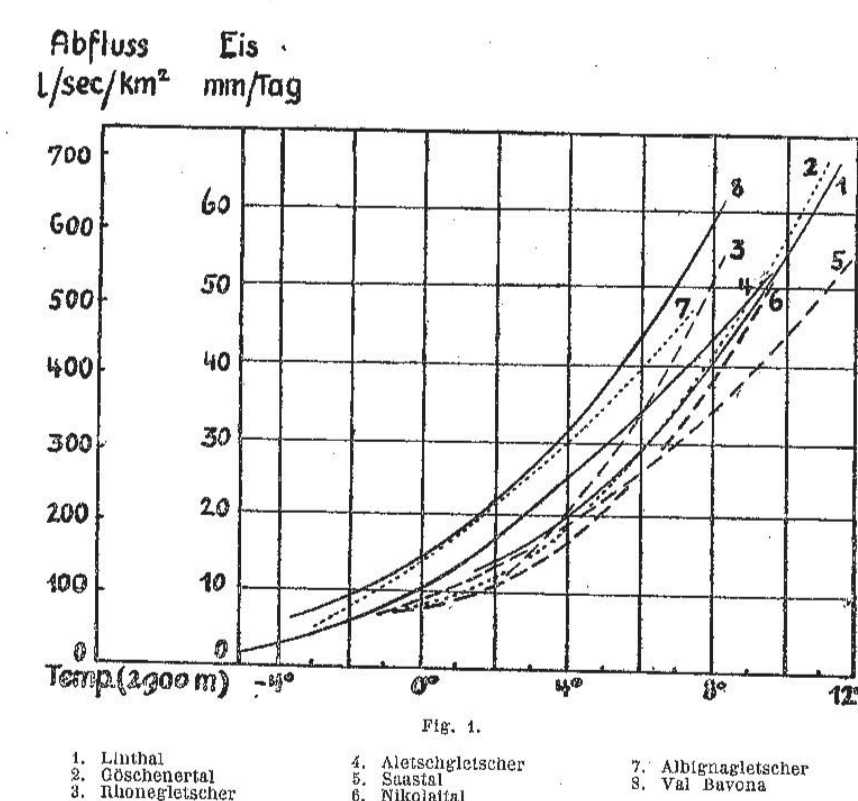

Fig. 1.

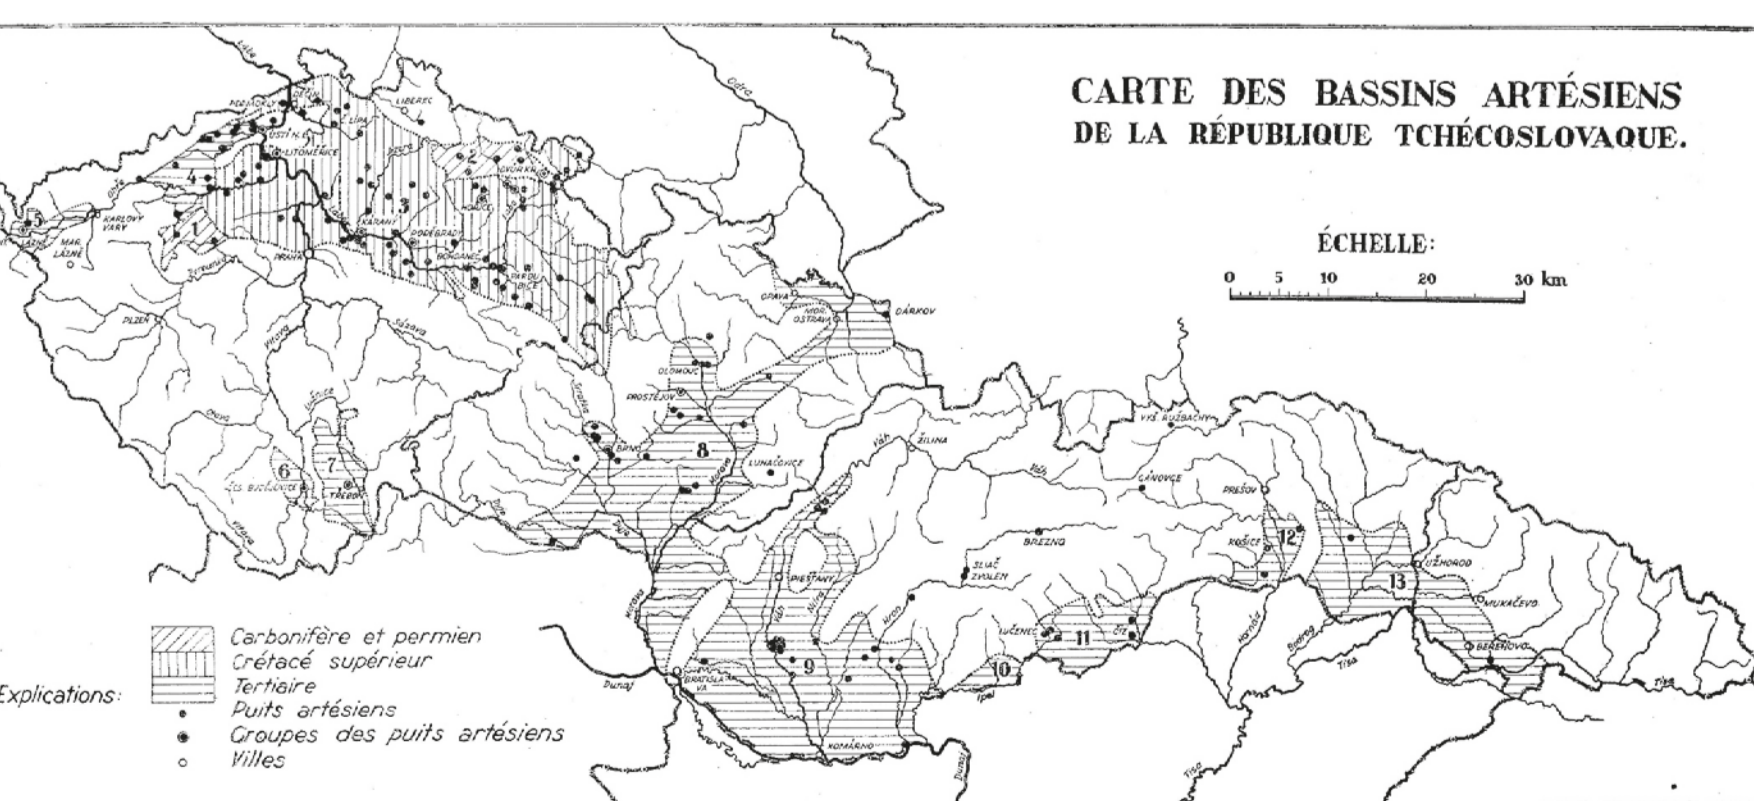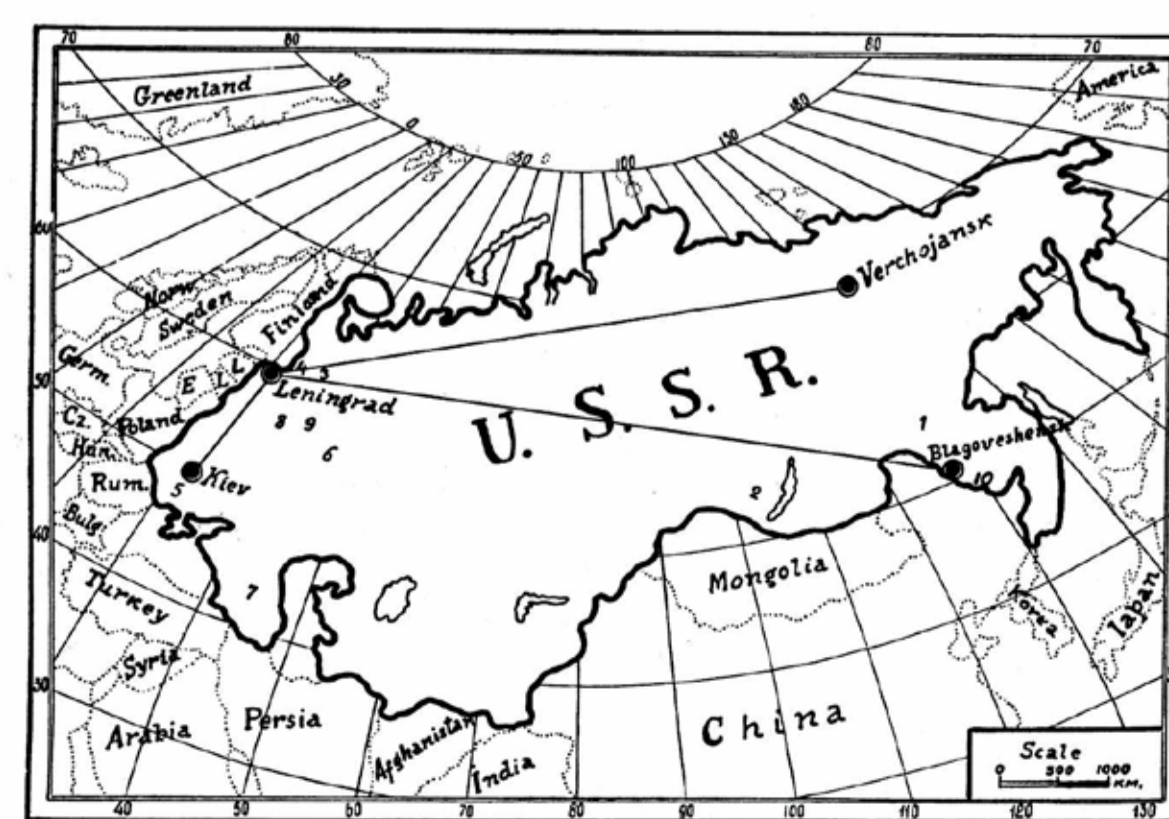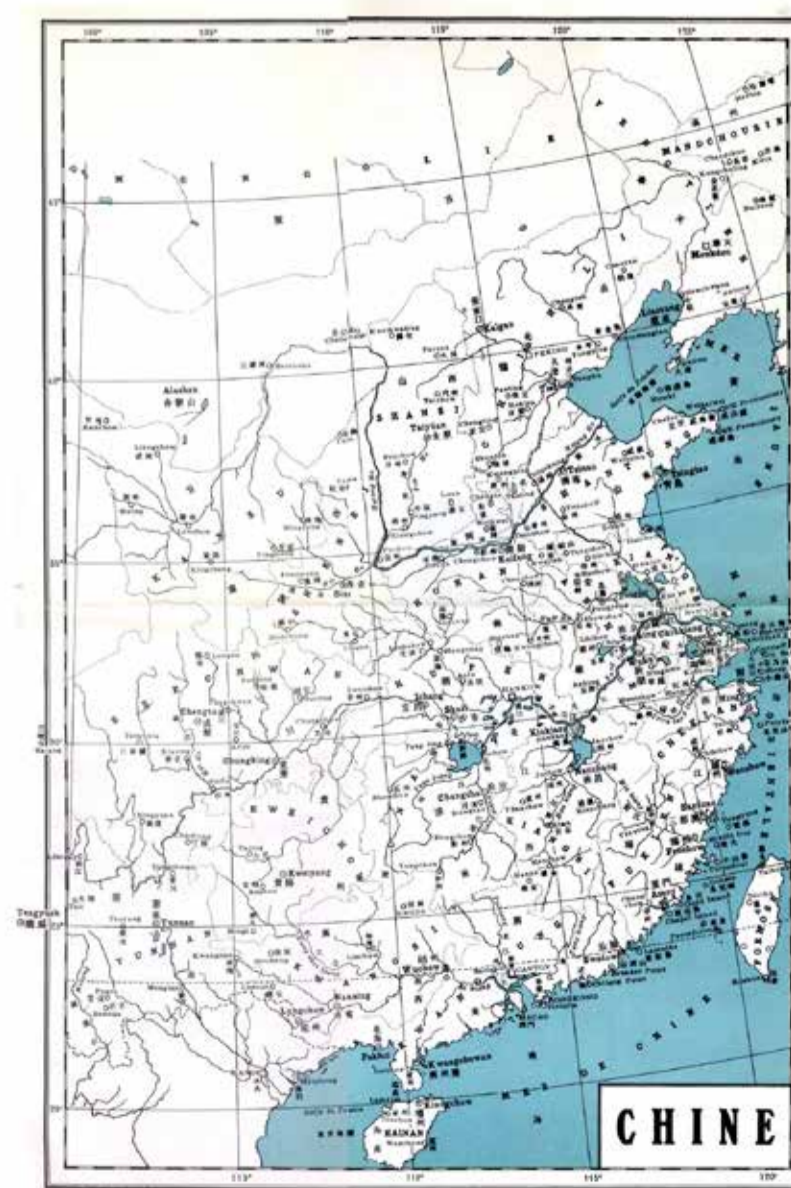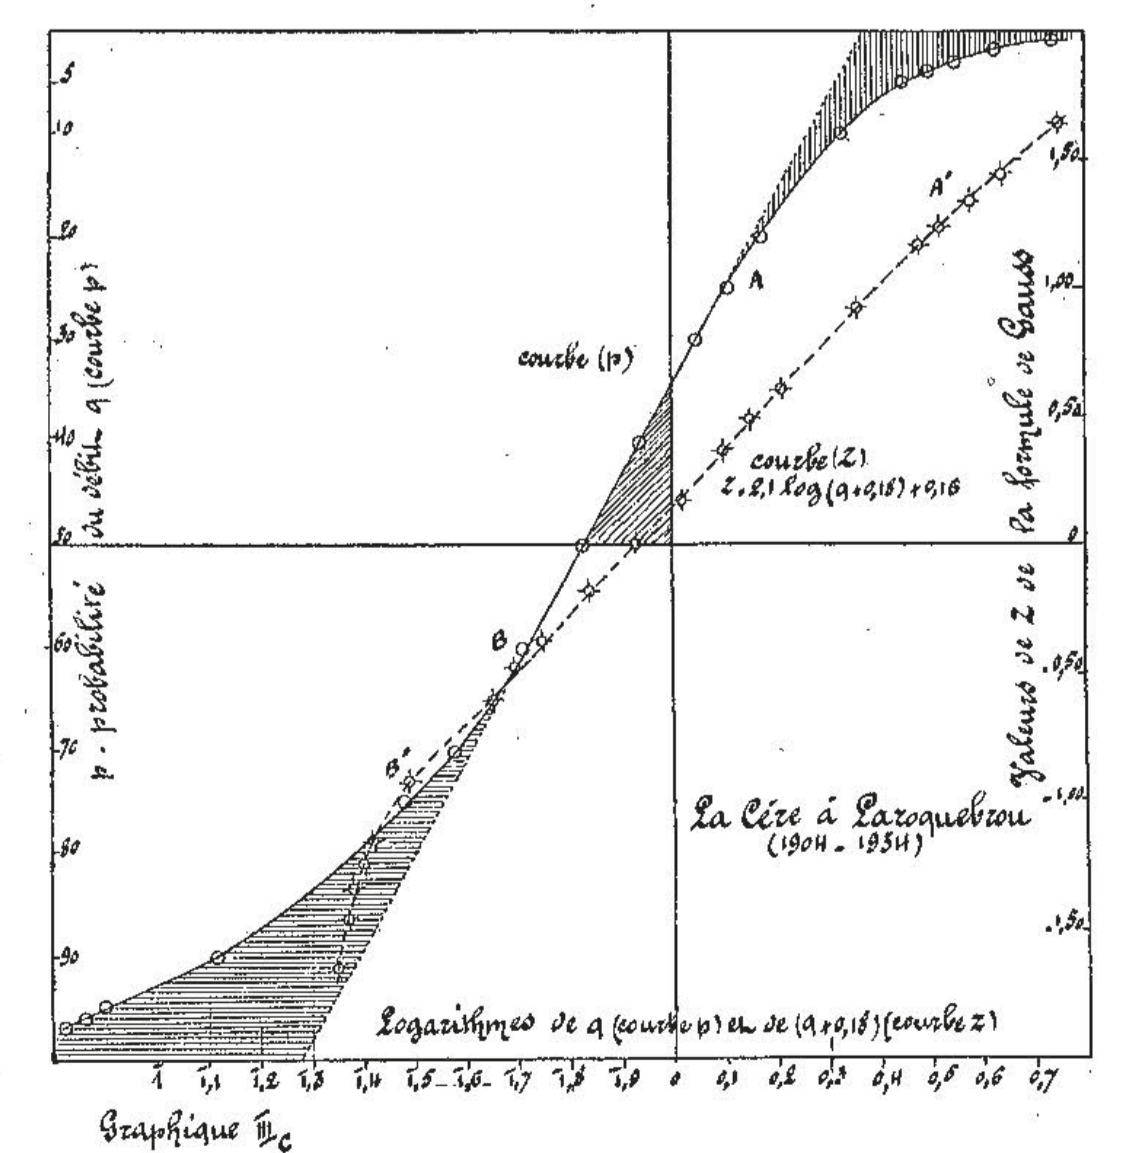

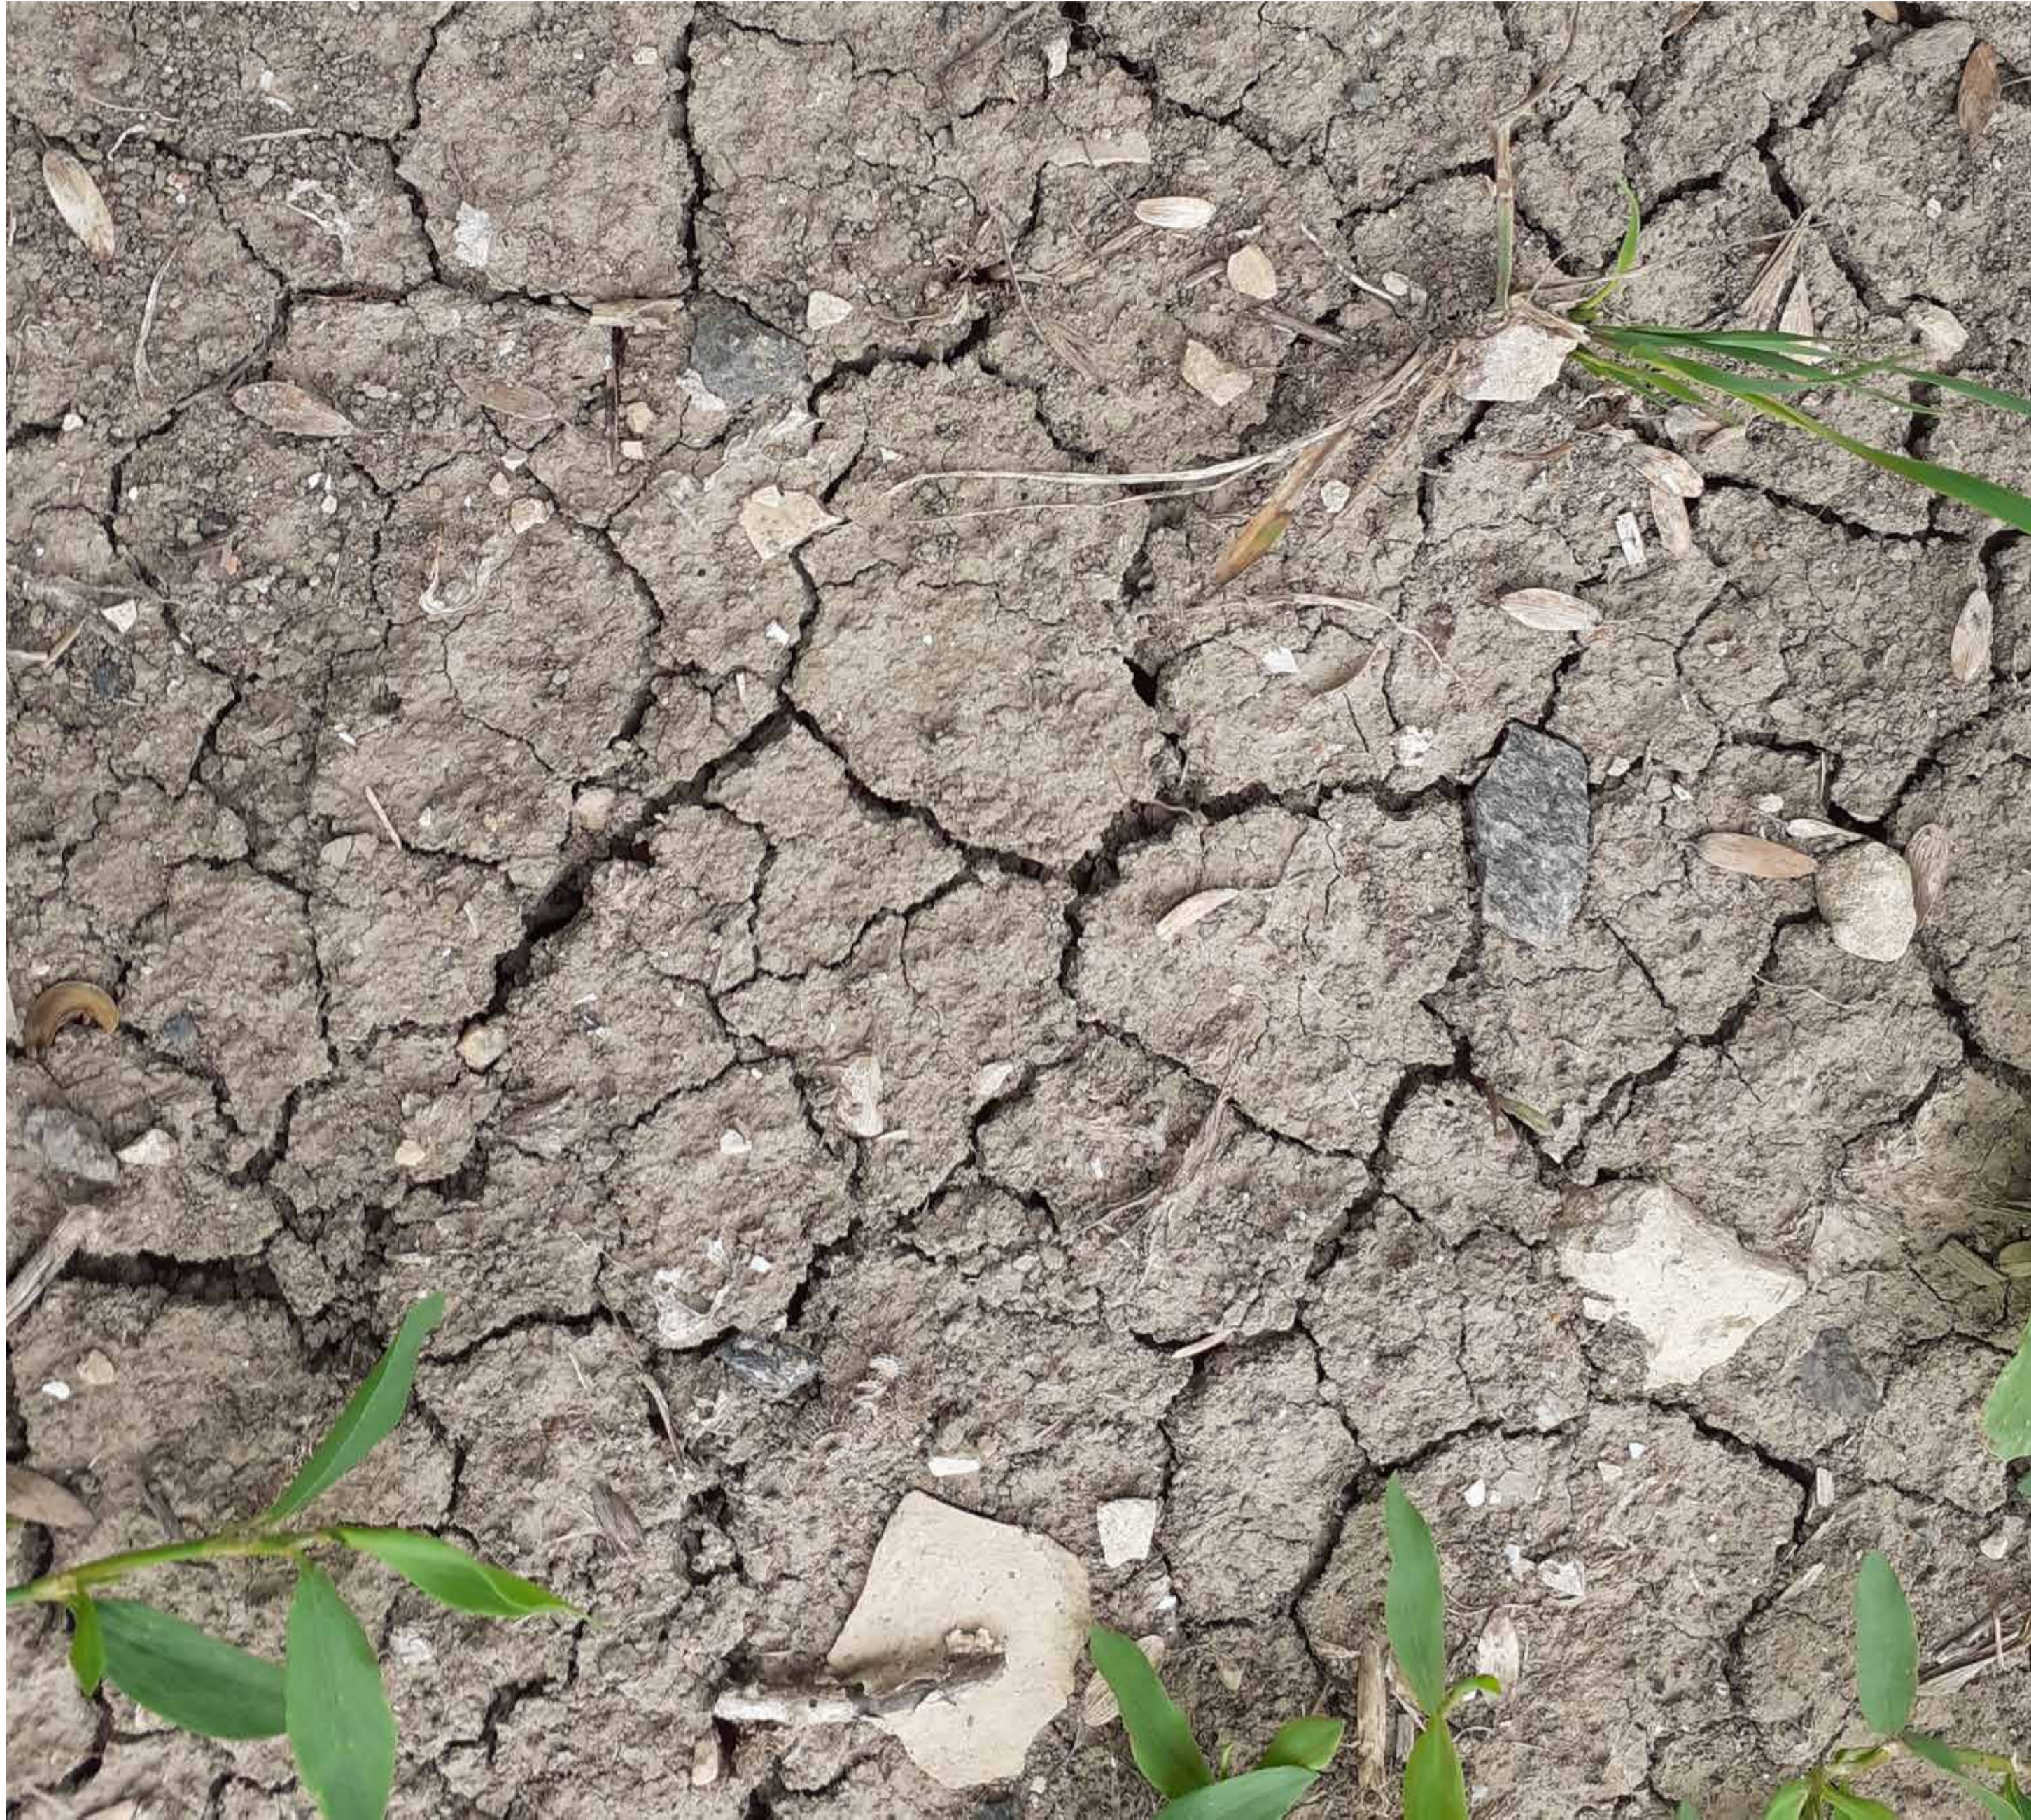

## Words in Titles of publications 1922-1952

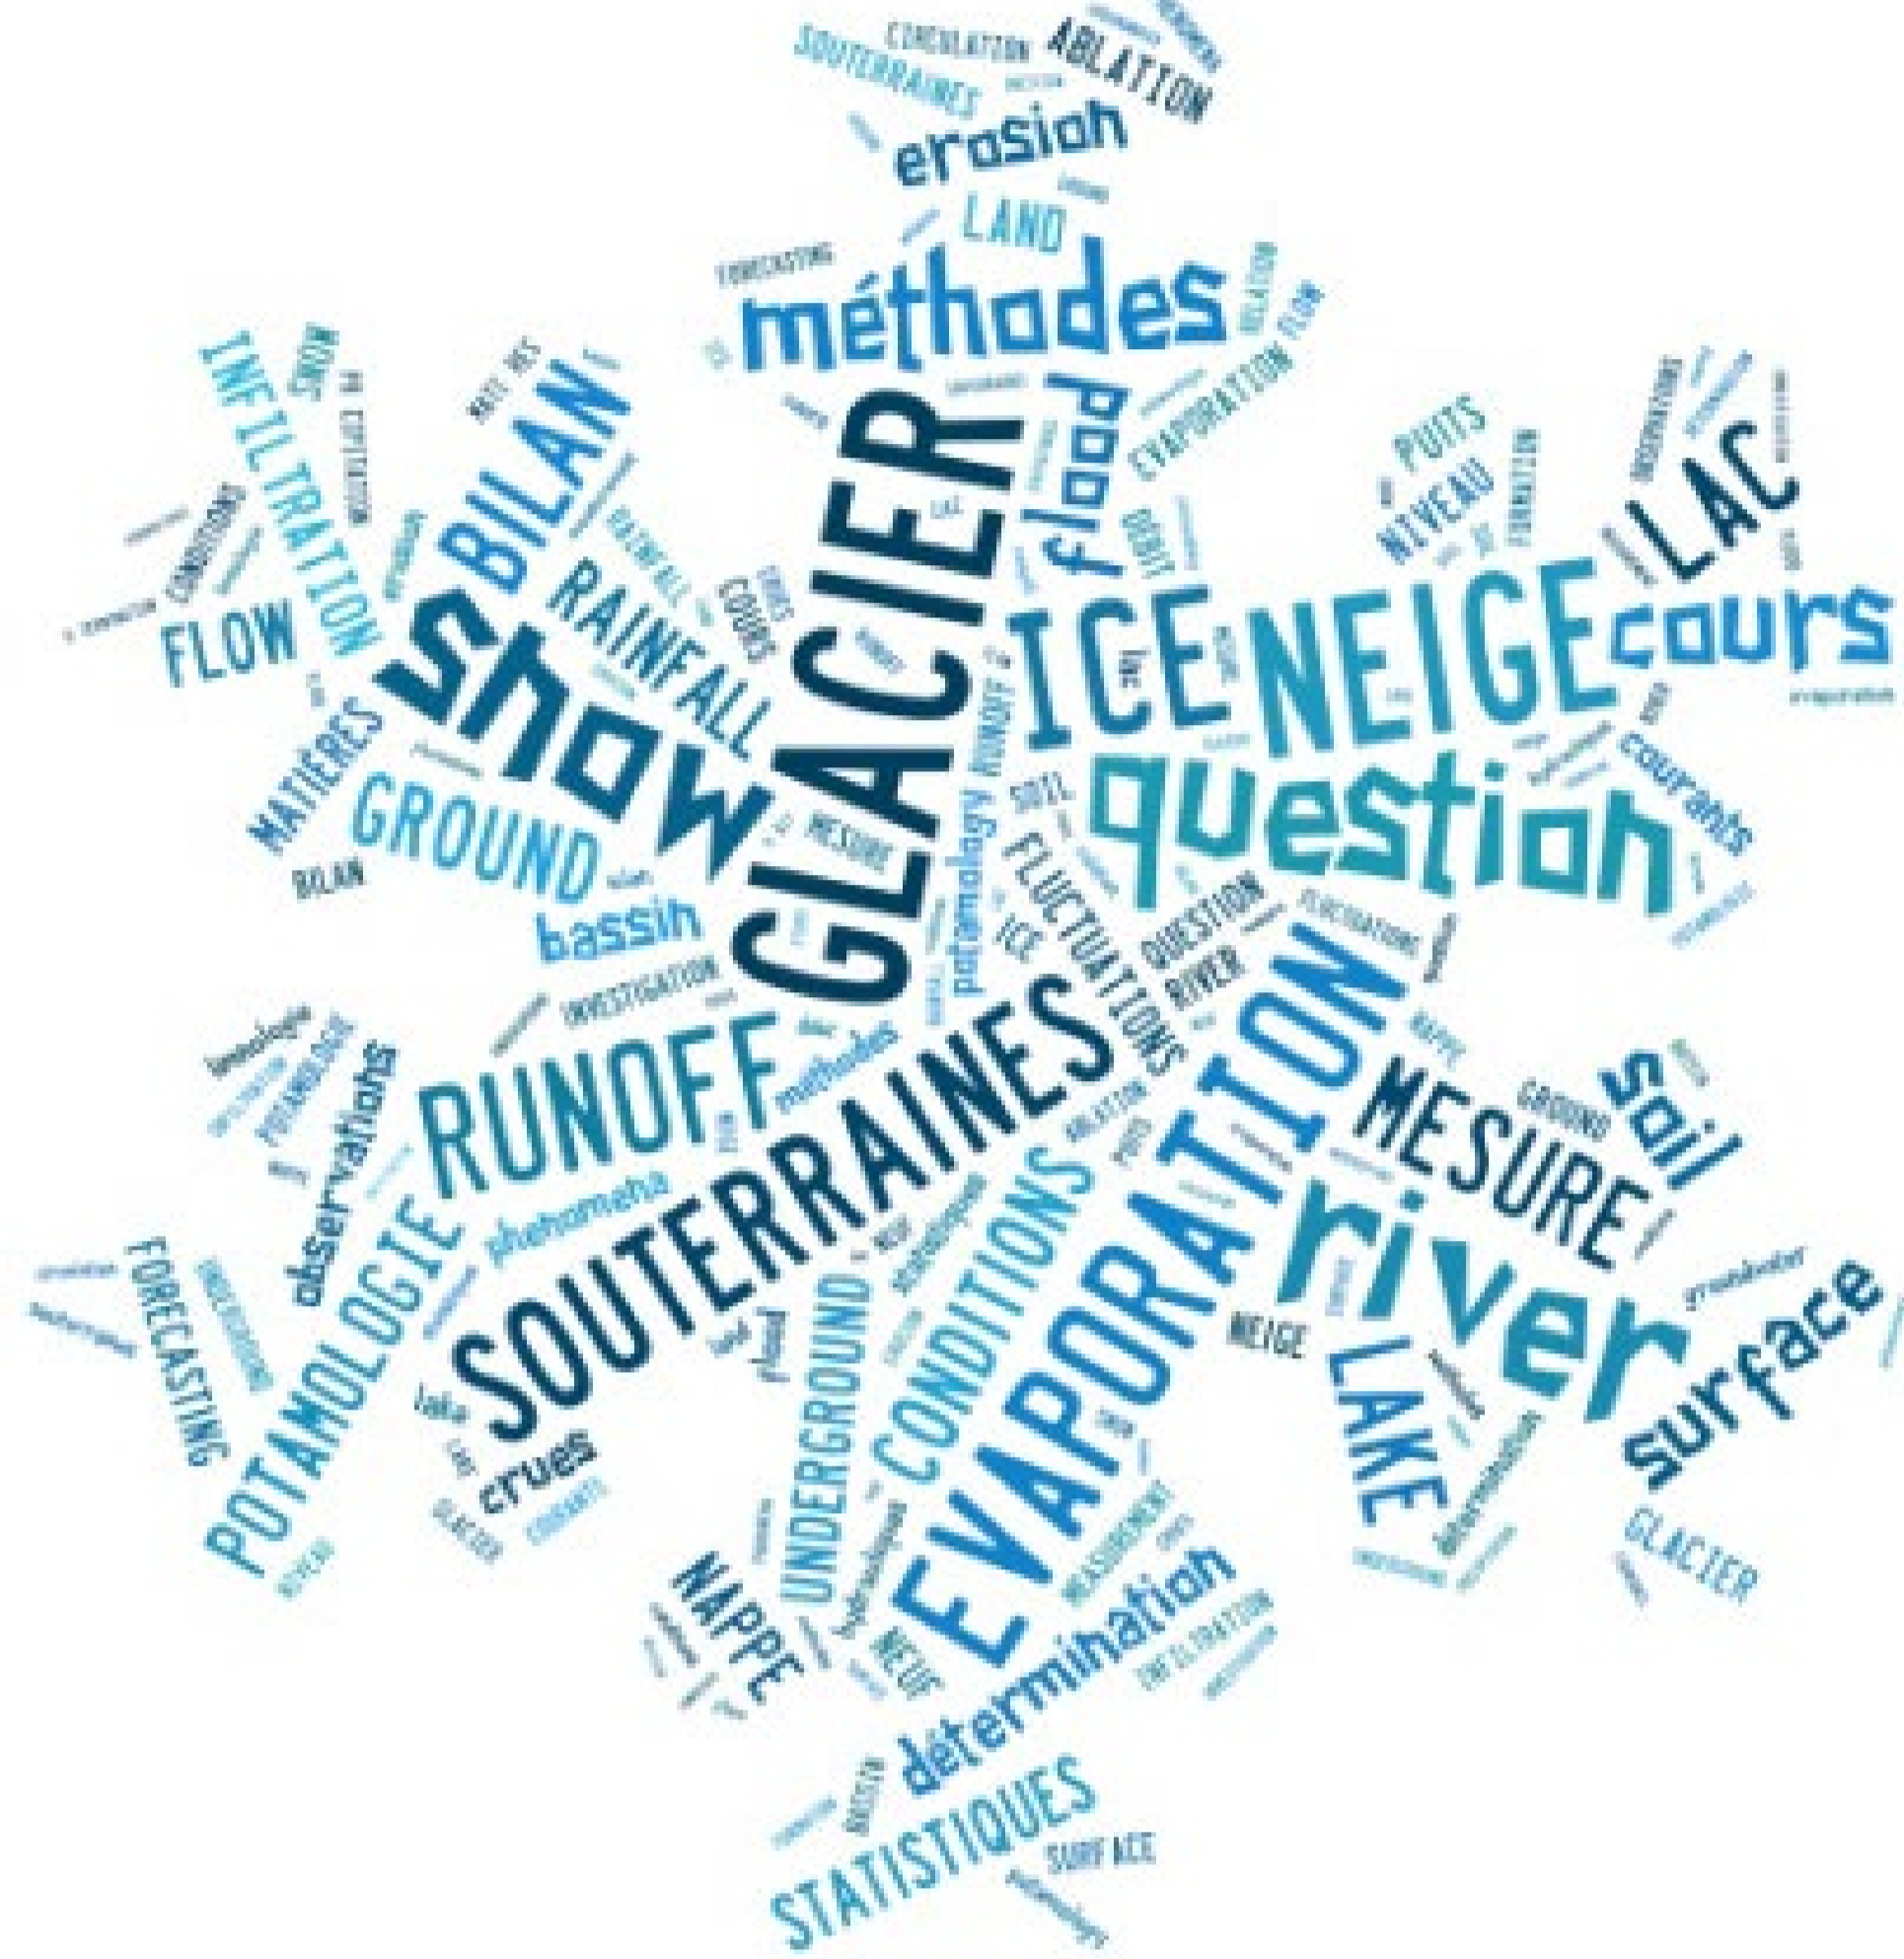

| CODE | FORM | TYPE                |
|------|------|---------------------|
| 1    |      | STELLAR CRYSTALS    |
| 2    |      | GRAUPEL             |
| 3    |      | HEXAGONAL PLATES    |
| 4    |      | HEXAGONAL COLUMNS   |
| 5    |      | CAPPED HEX. COLUMNS |
| 6    |      | ICE NEEDLES         |
| 7    |      | ASYM. CRYSTALS      |
| 8    |      | POWDER SNOW         |
| 9    |      | SLEET               |

### 5) THE COOPERATIVE SNOW INVESTIGATIONS PROGRAM. ITS OBJECTIVES AND OPERATIONS

by  
F. L. BROWN and W. T. WILSON (U.S.A.)

#### INTRODUCTION

In recognition of the influence of snow on the planning, design, and operation of flood control and multiple purpose projects in the mountain regions of the United States, there was initiated in 1942 by the Weather Bureau and the Civil Works Administration a cooperative study of the snow problem. This study was organized as a cooperative snow investigations program for the purpose of:

1. Determining a practicable and reliable method of evaluating the maximum snow water content of snow on the ground and on structures which may be produced by snowfall and rain.
2. Developing a practicable and reliable method of forecasting snowfall and rain.
3. Expanding basic knowledge of the hydrodynamic and thermodynamic characteristics of snow through a program of systematic scientific investigation.
4. Increasing knowledge of meteorological, climatological and hydrological phenomena as they affect snow.
5. Applying the results of the above to the design of flood control structures and of catchments of all types of dams in the improvement of flood-control systems and to control of erosion, sedimentation, power and irrigation water resources, i.e., reservoir regulation. Previous investigations have furnished very little knowledge about the water storage capacity, melting rates and timing rates of the various types of snowpacks in the critical snow regions.

Therefore, the study of the physics of snow is an important phase of the snow investigations.

Workshop studies have been conducted at Santa Fe, New Mexico, by the Weather Bureau and University of New Mexico, where the present Technical Committee was organized. The investigations, in cooperation with the U. S. G. S. and the U. S. Army, are being carried out in the mountain regions of the United States. The investigations are being carried out in the mountain regions of the United States. The investigations are being carried out in the mountain regions of the United States.

#### ORGANIZATION

The Program Director, a Corps of Engineers employee, is in administrative charge of the program and is responsible for the proper coordination of the various phases of the program. Also, there is a Technical Committee, the members of which are representatives of the various agencies involved in the program. This committee is in direct contact with the Program Director, but is not responsible for the program. The Program Director, a Corps of Engineers employee, is in administrative charge of the program and is responsible for the proper coordination of the various phases of the program.

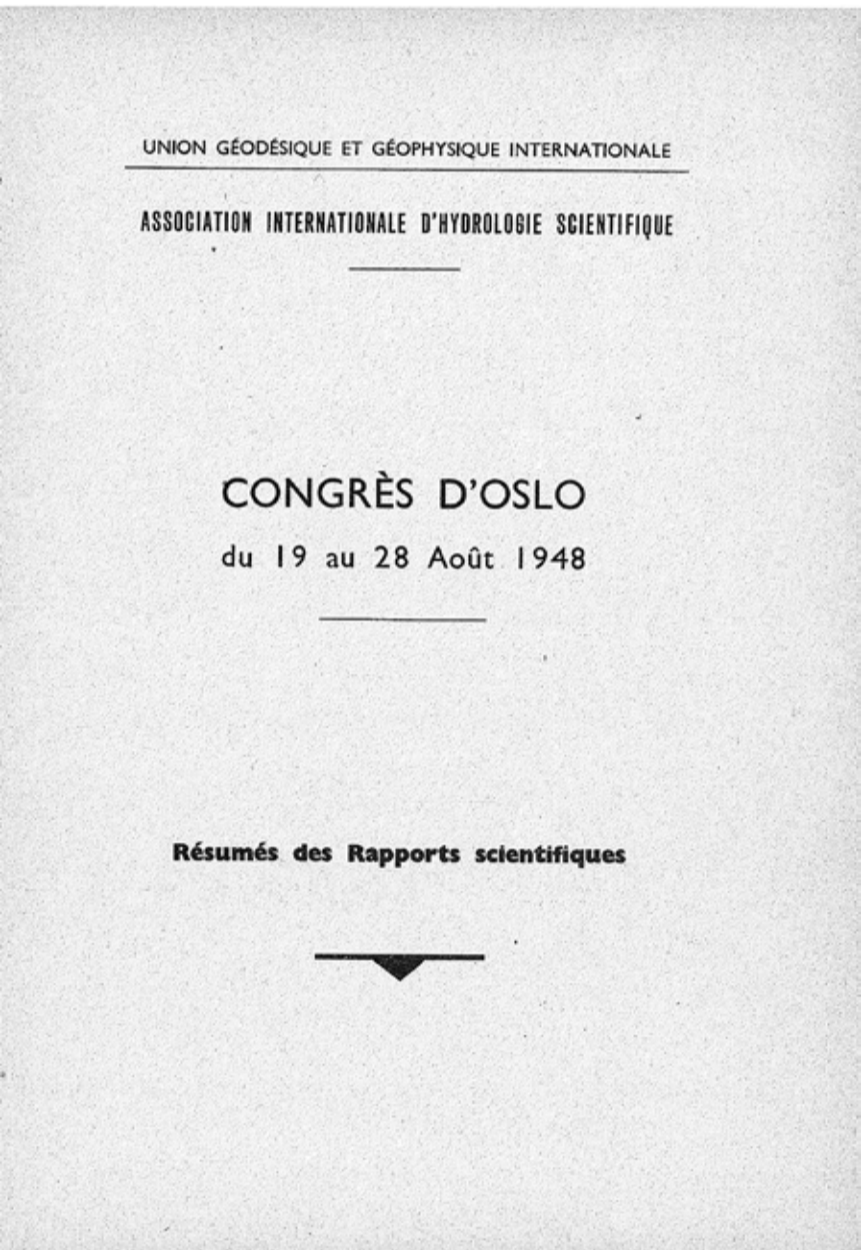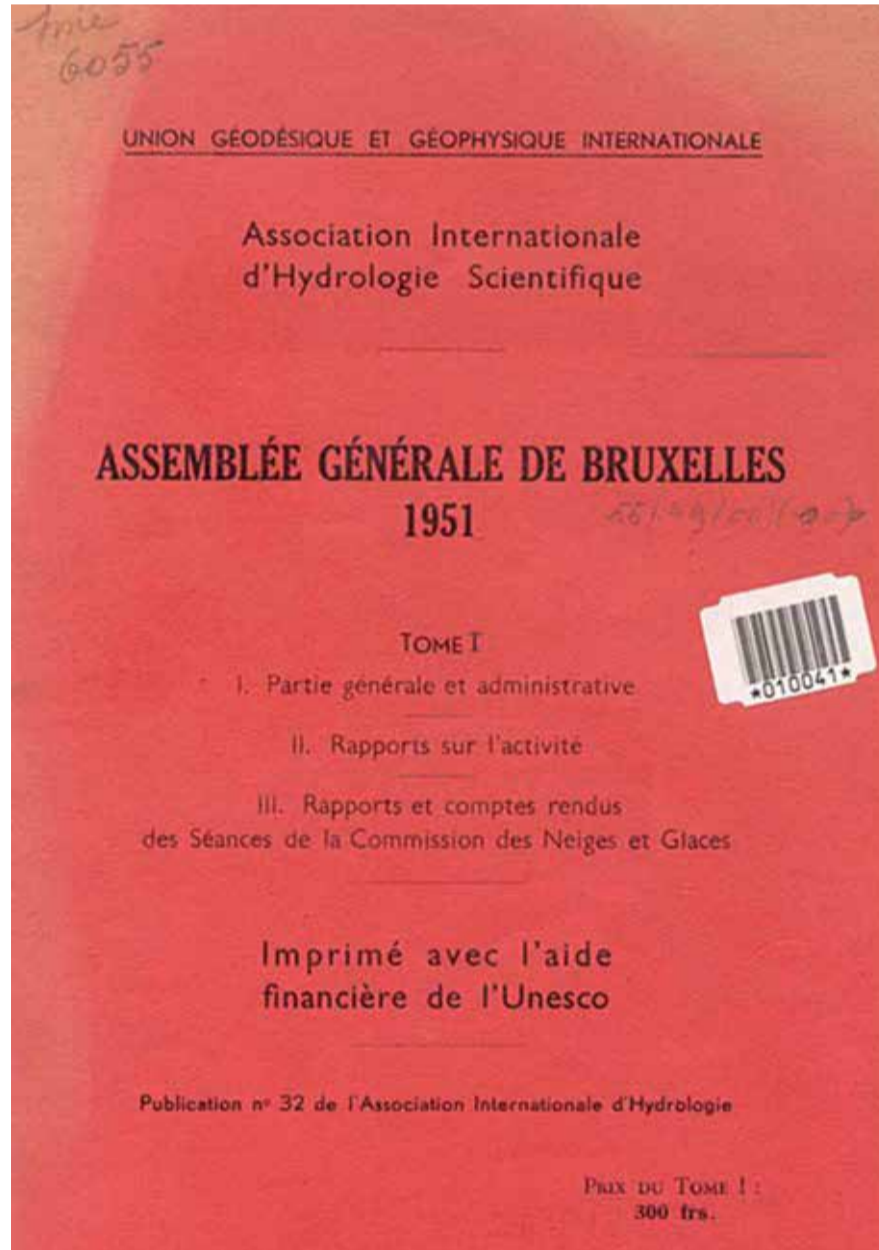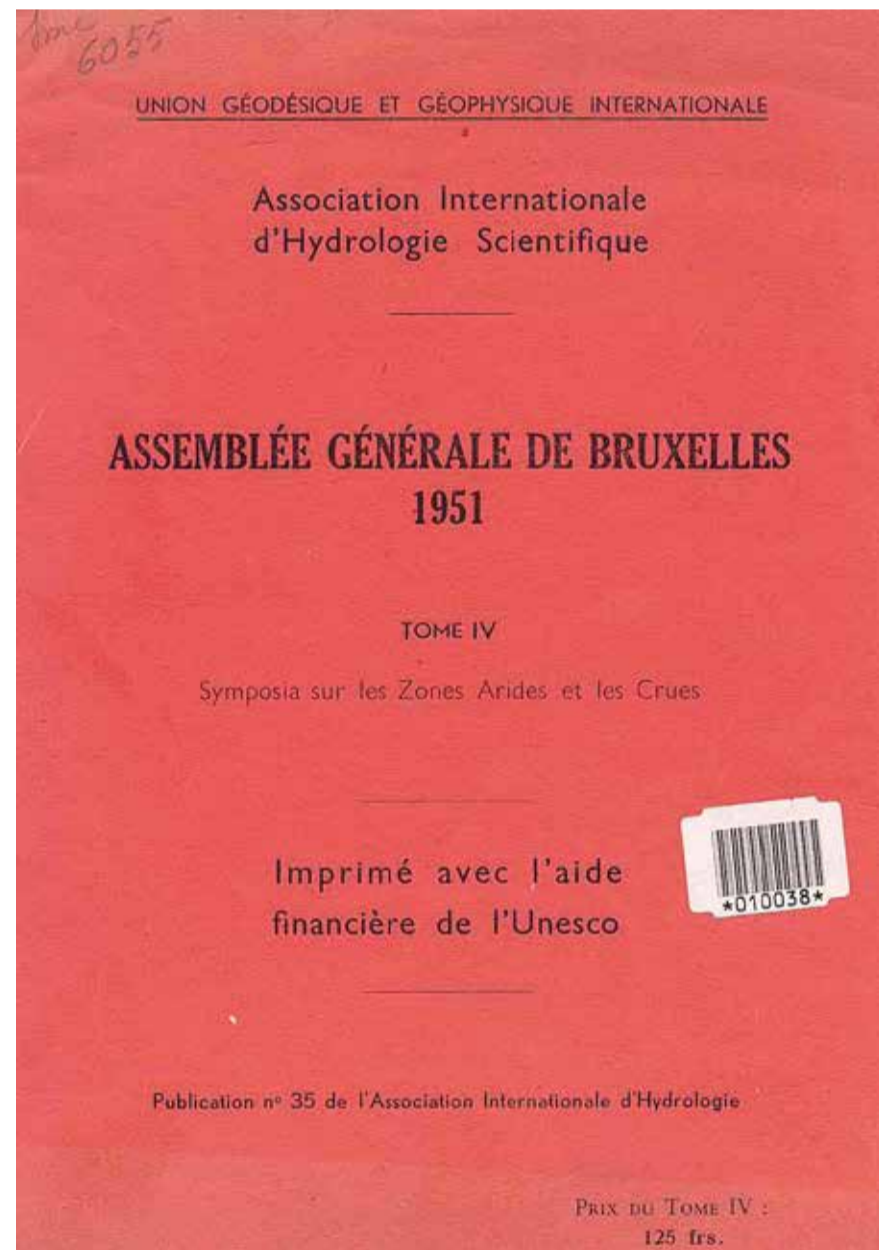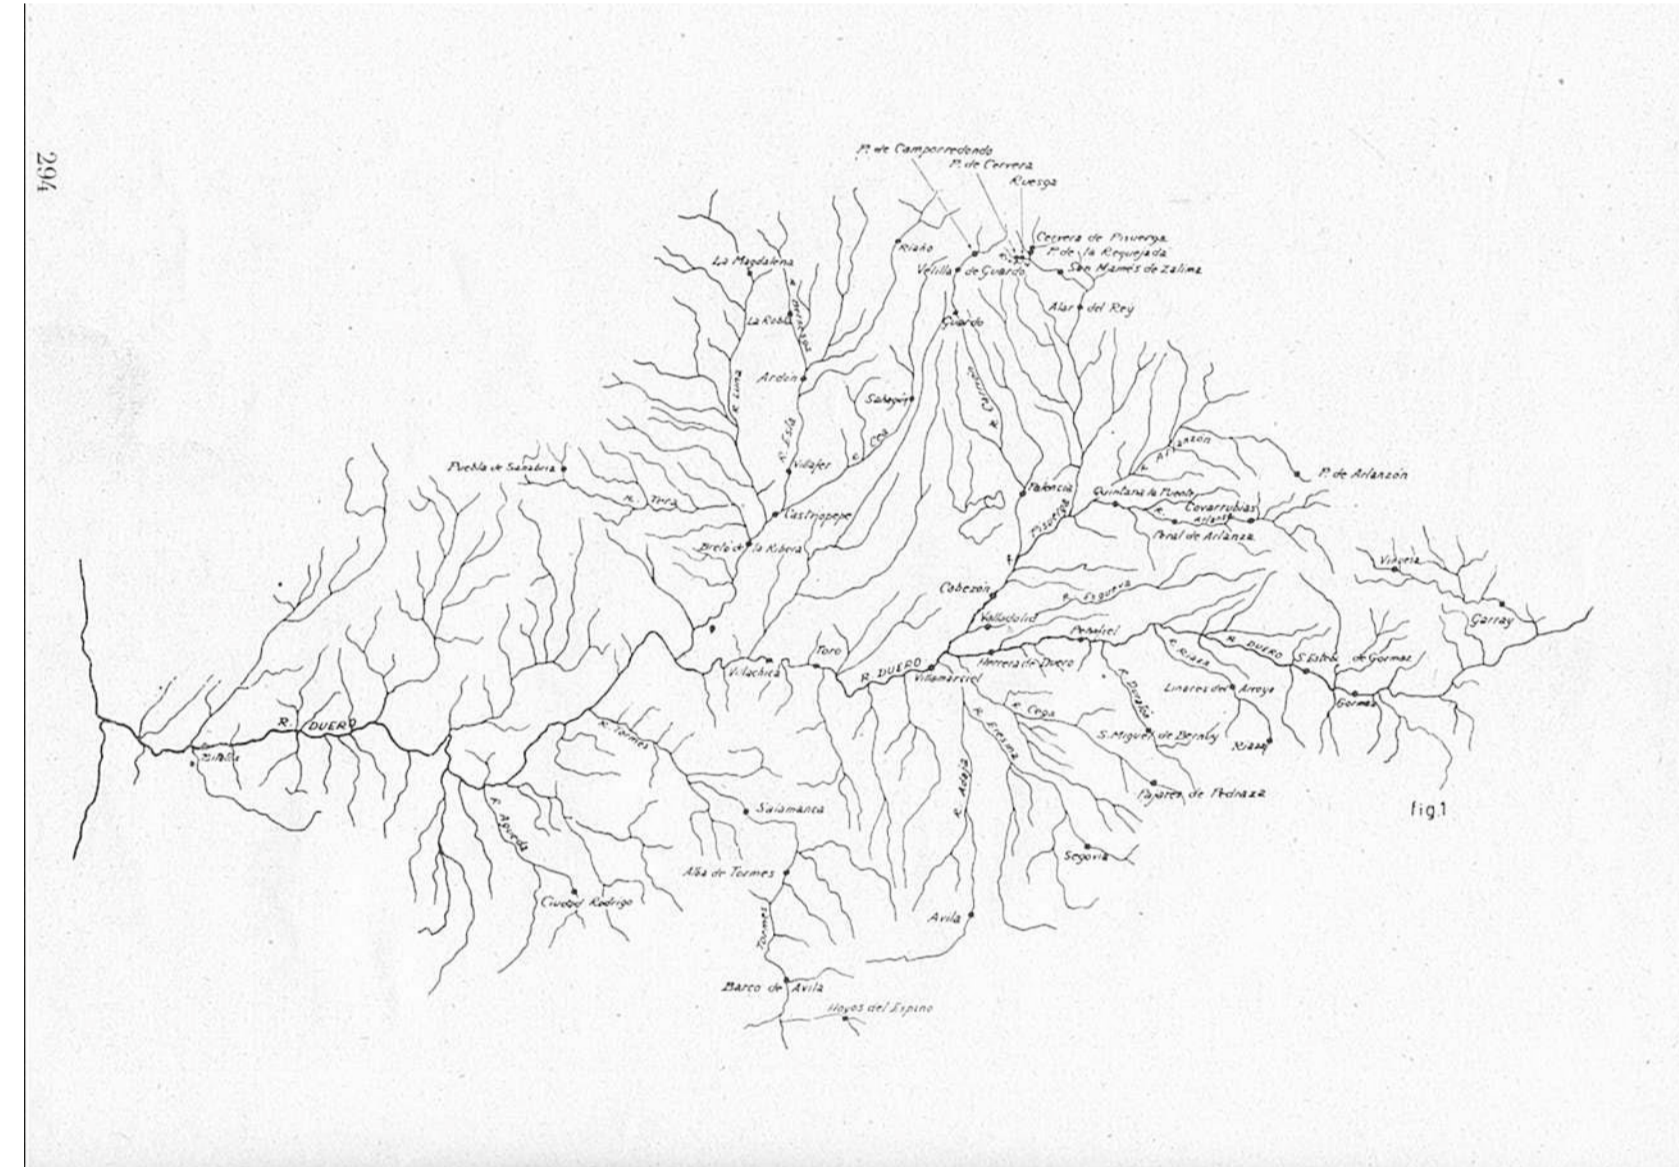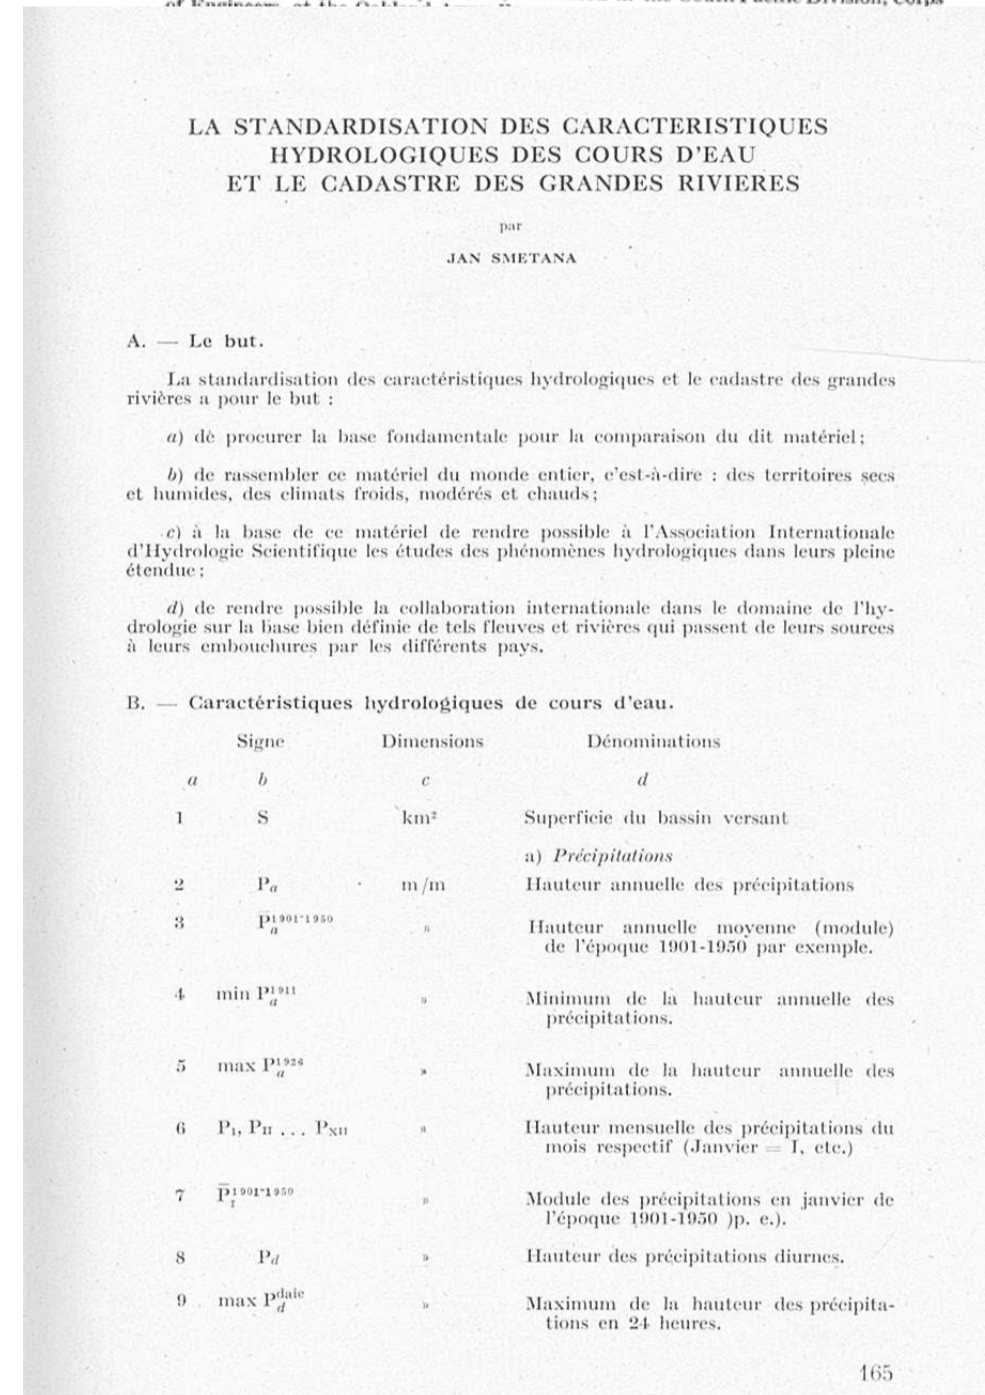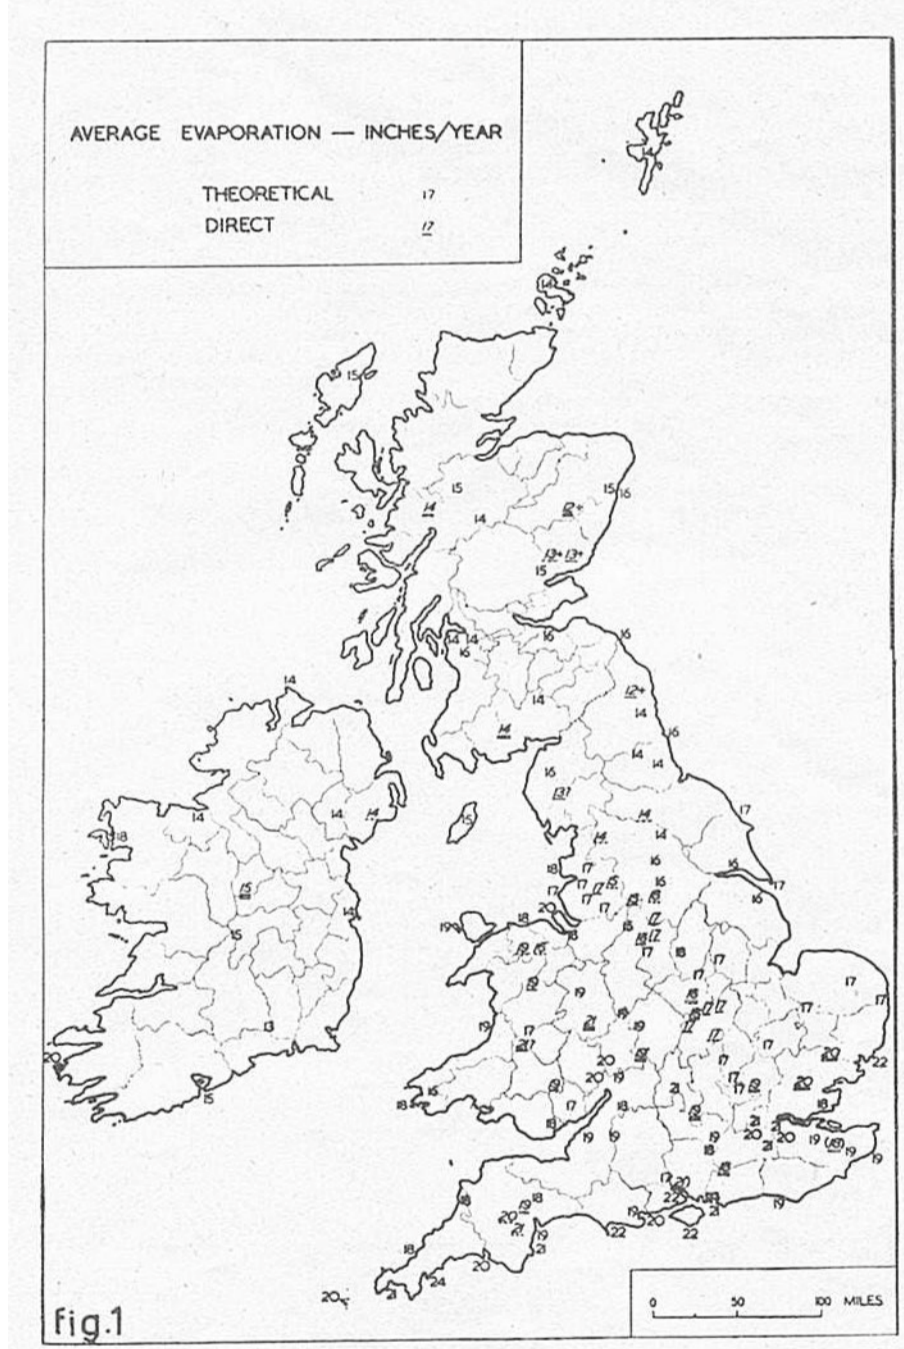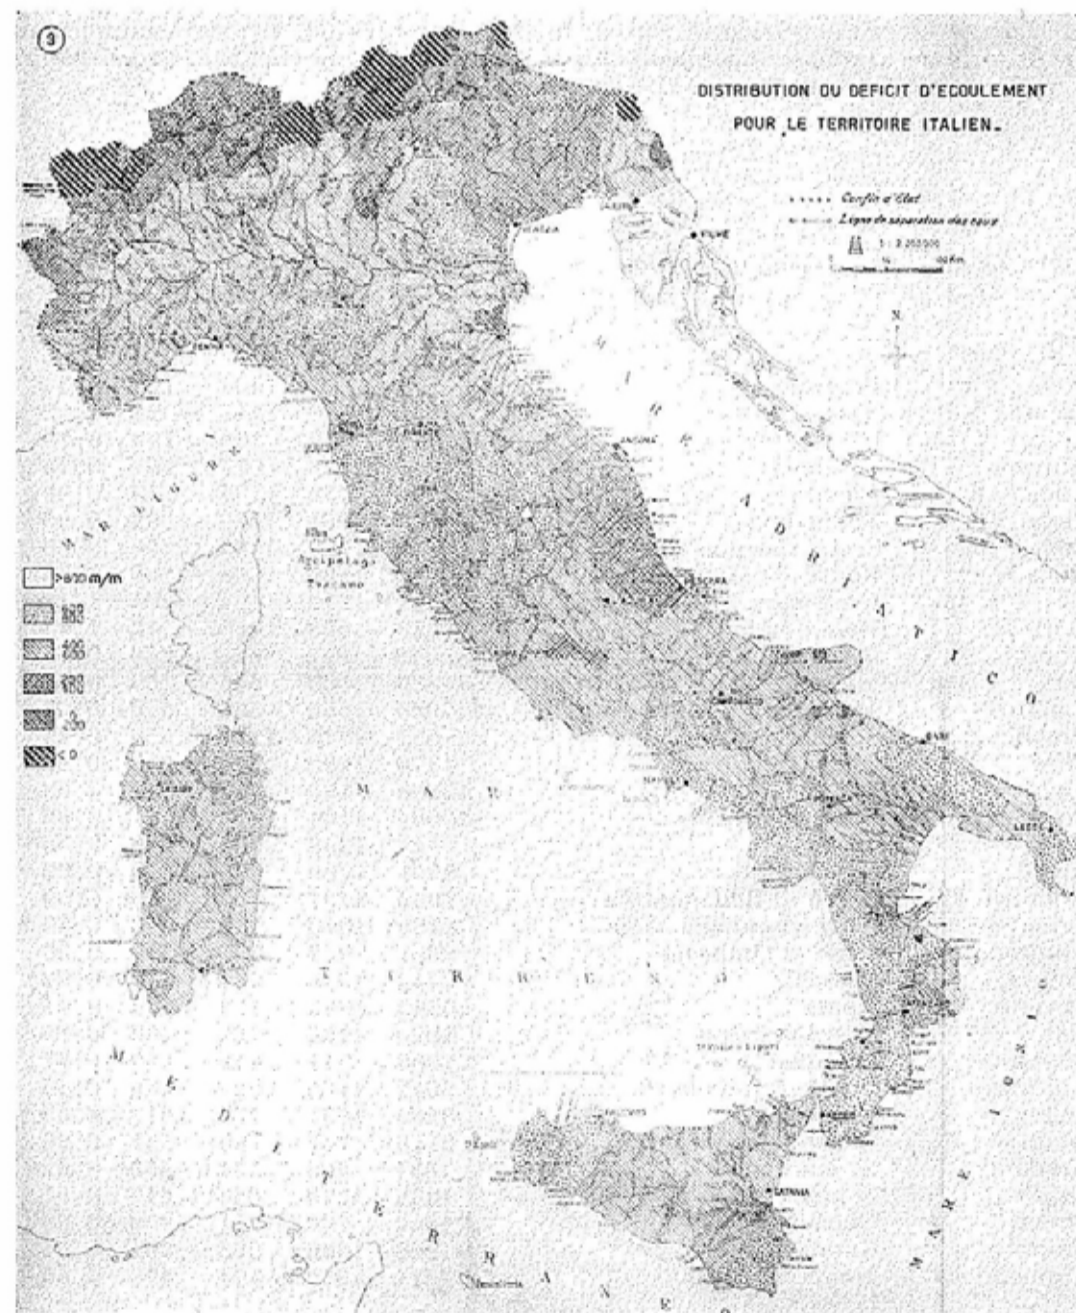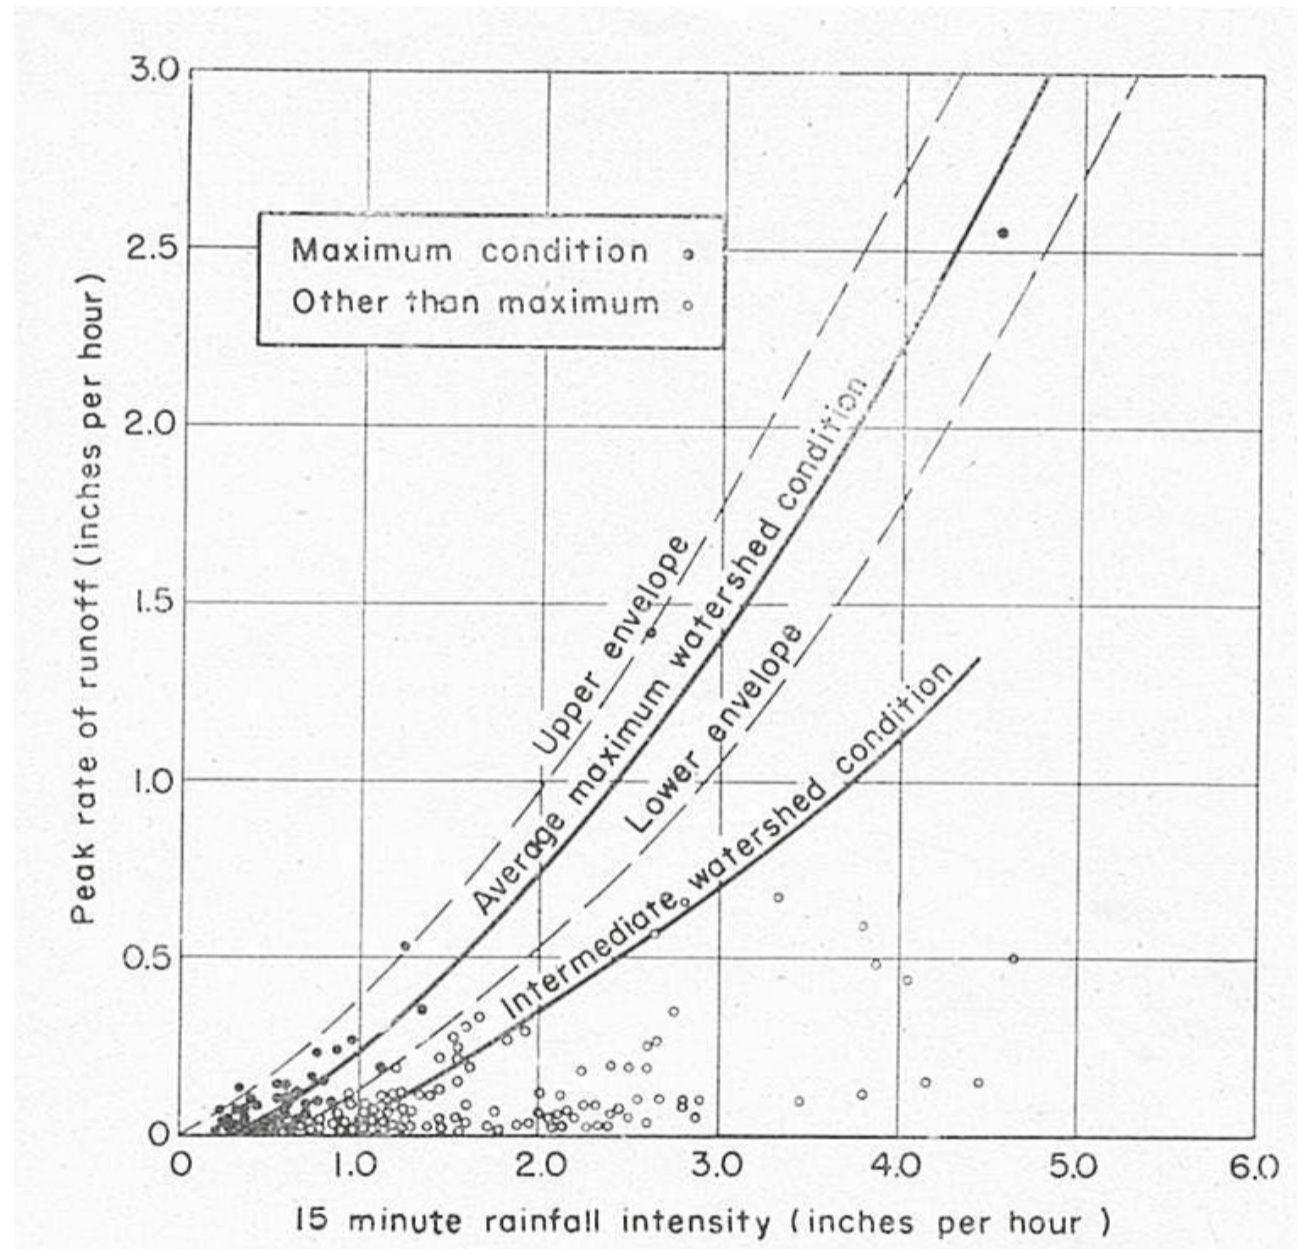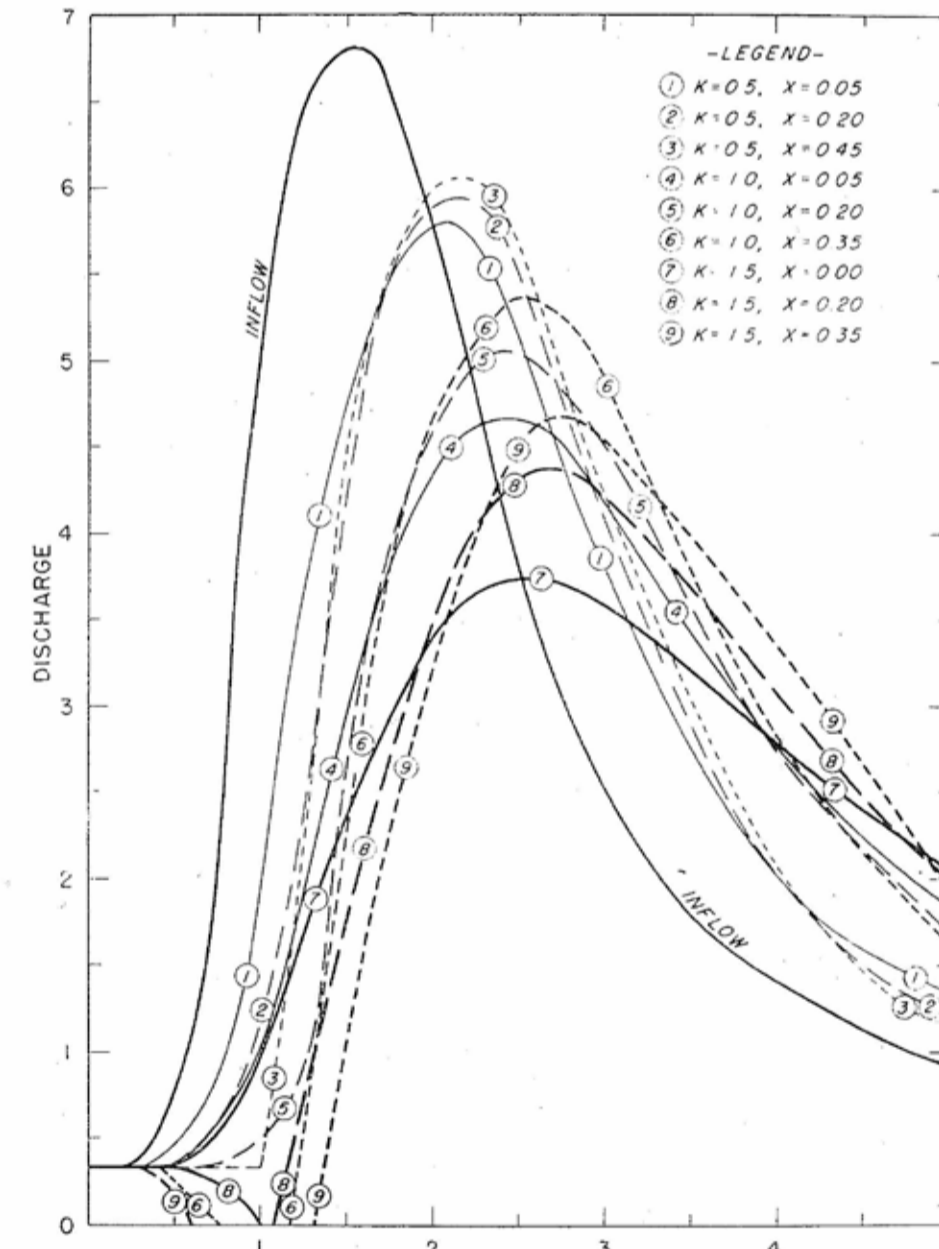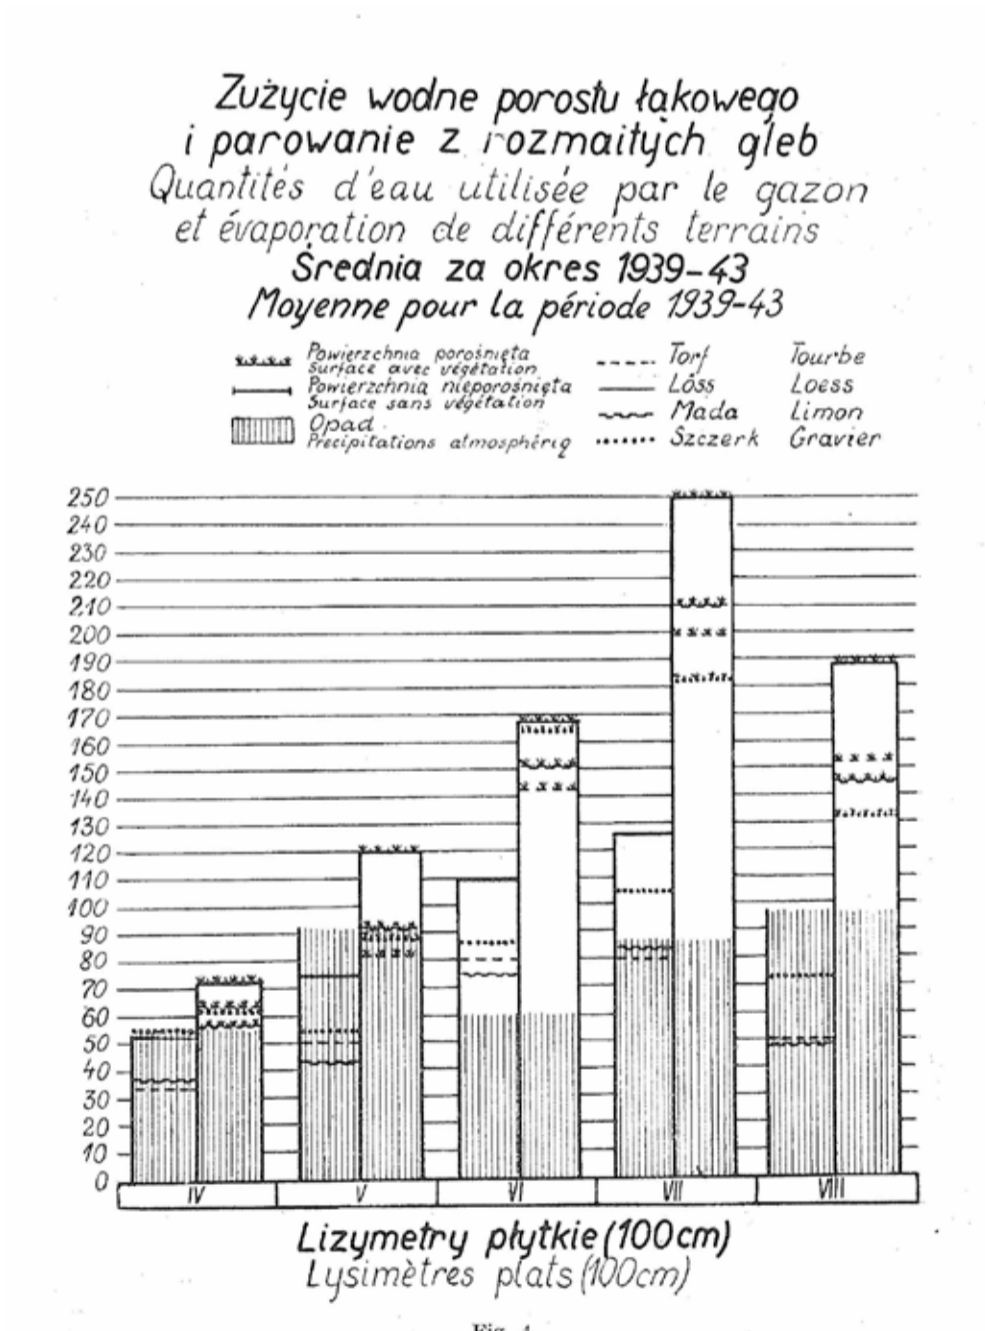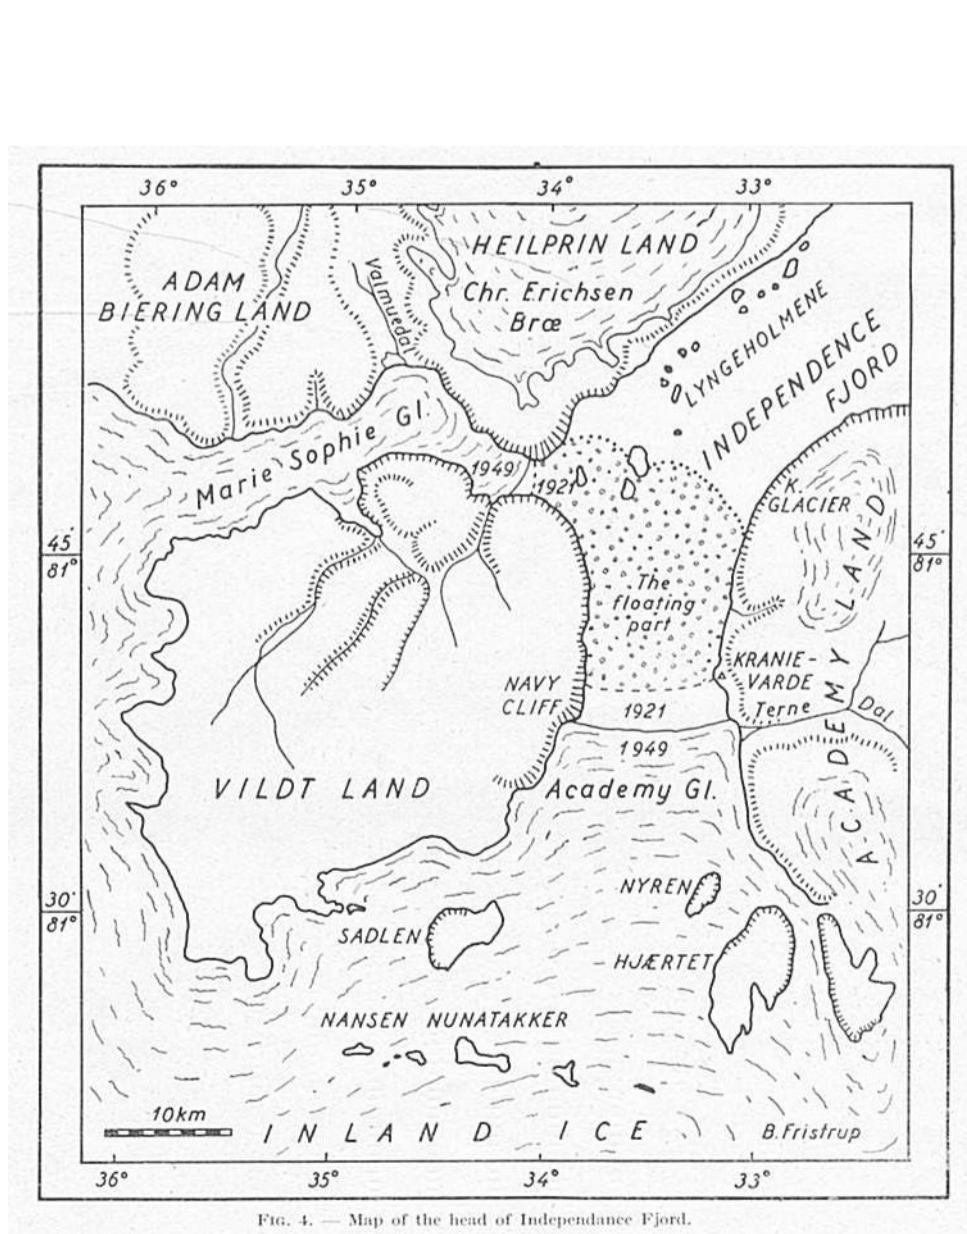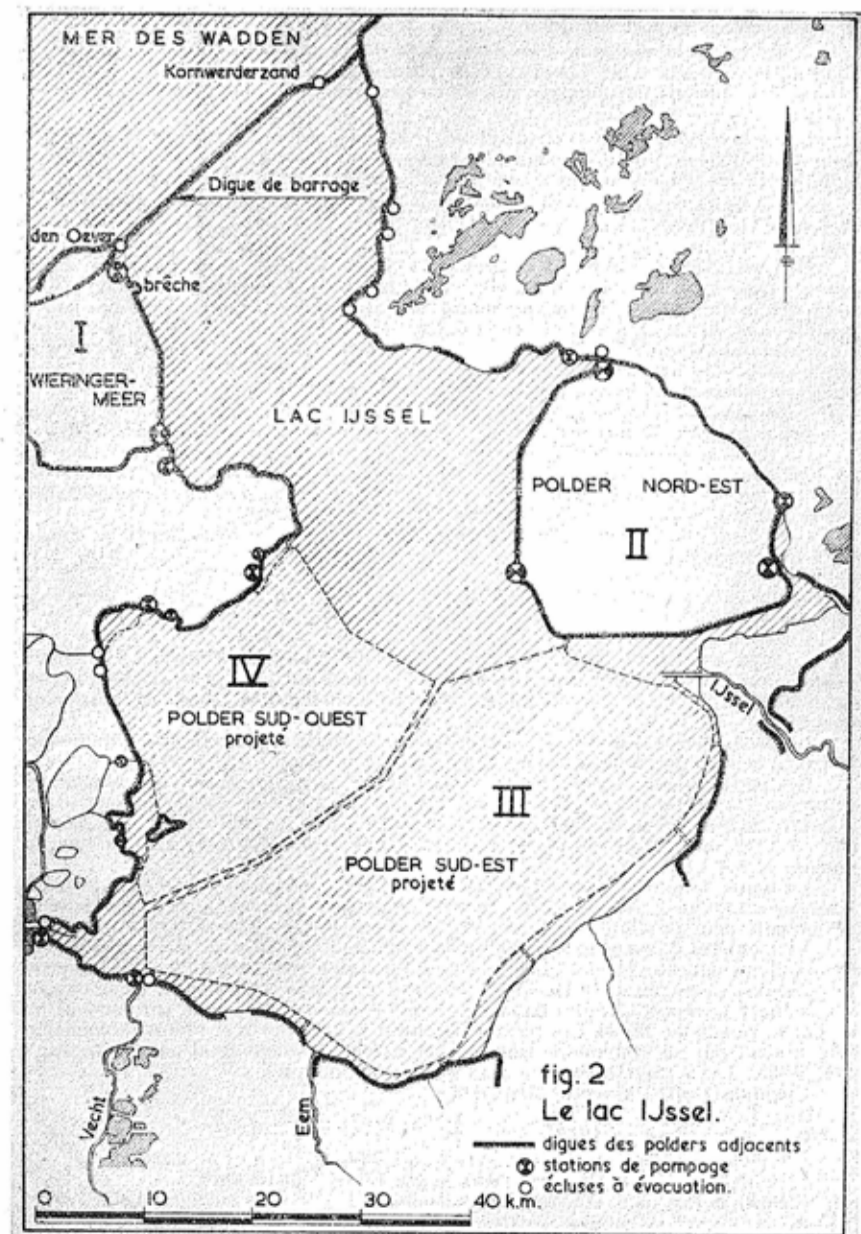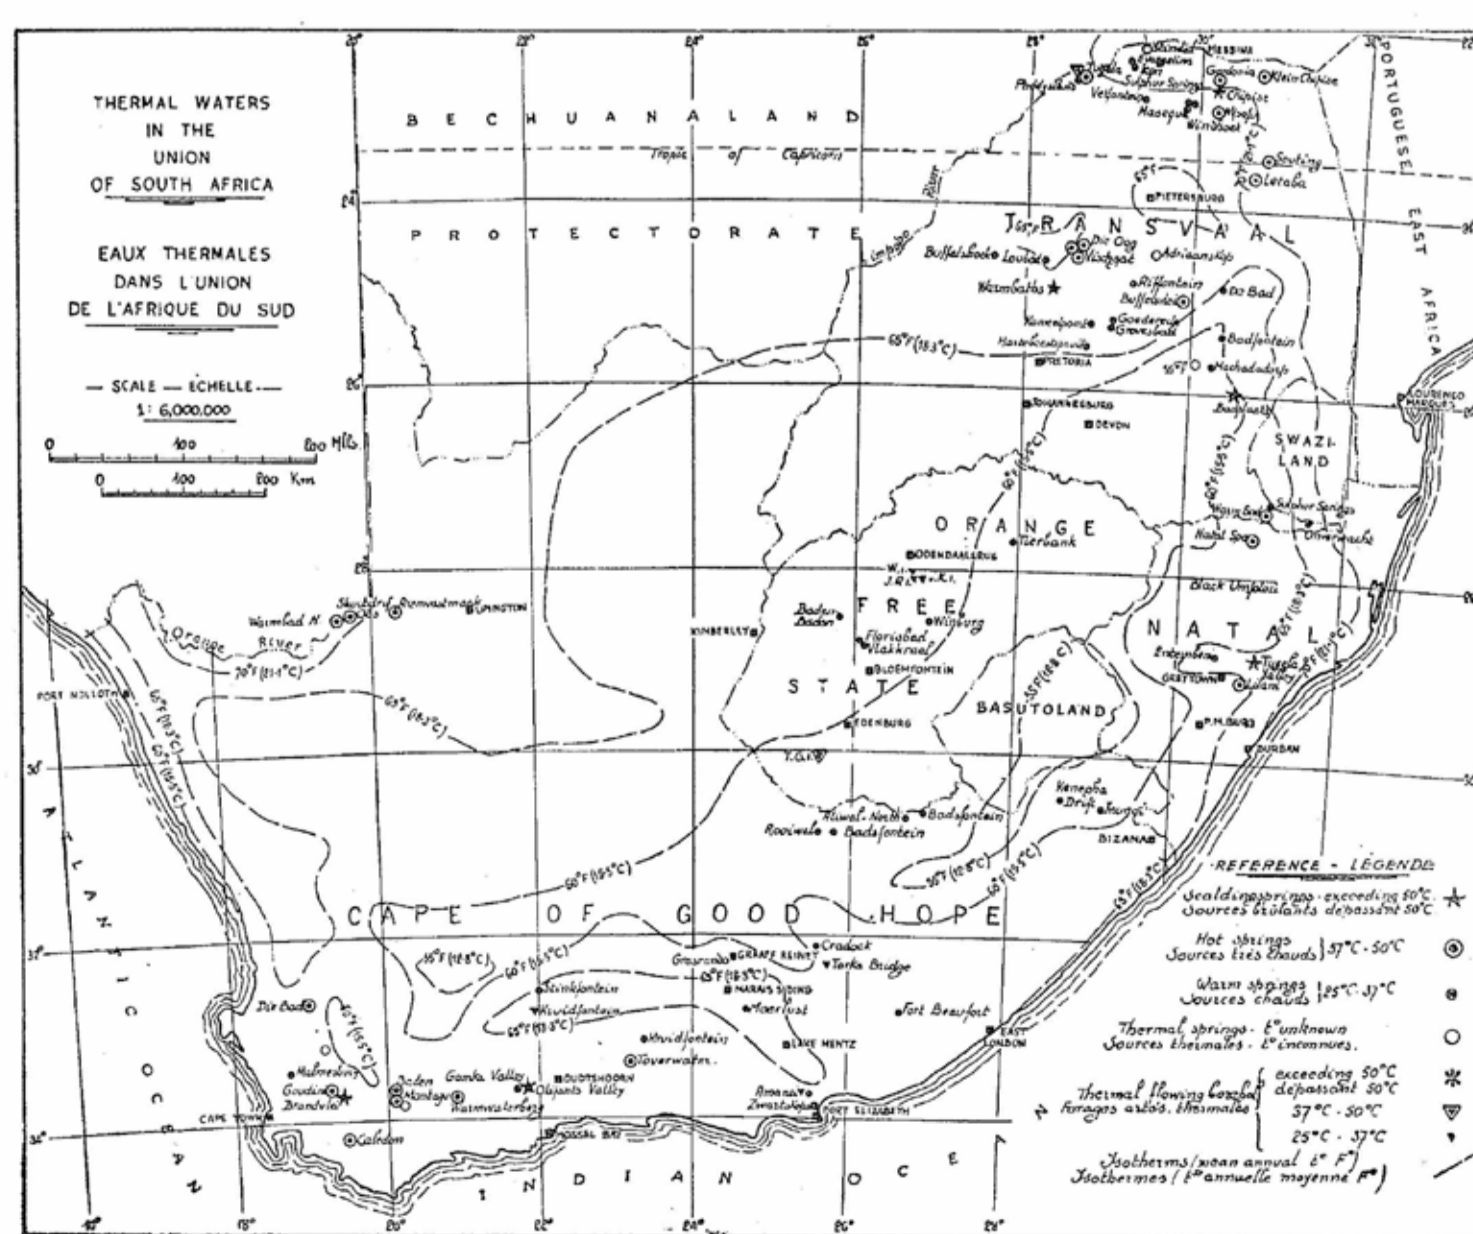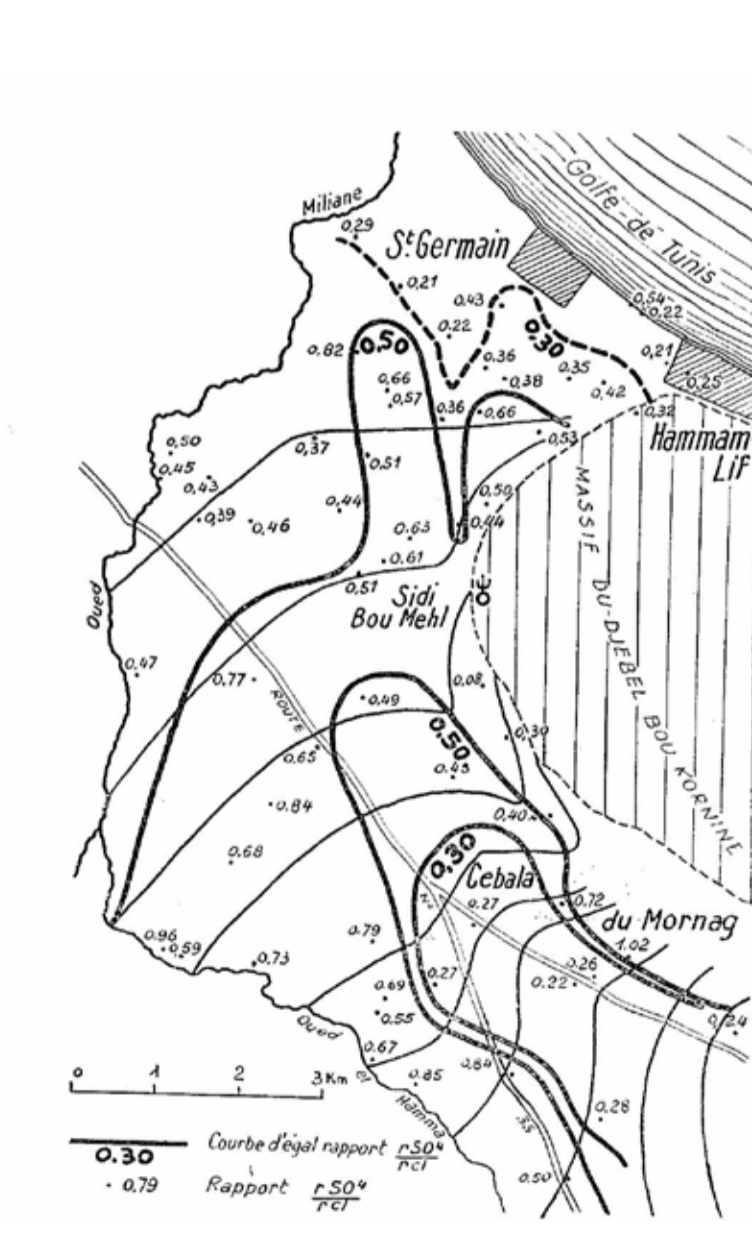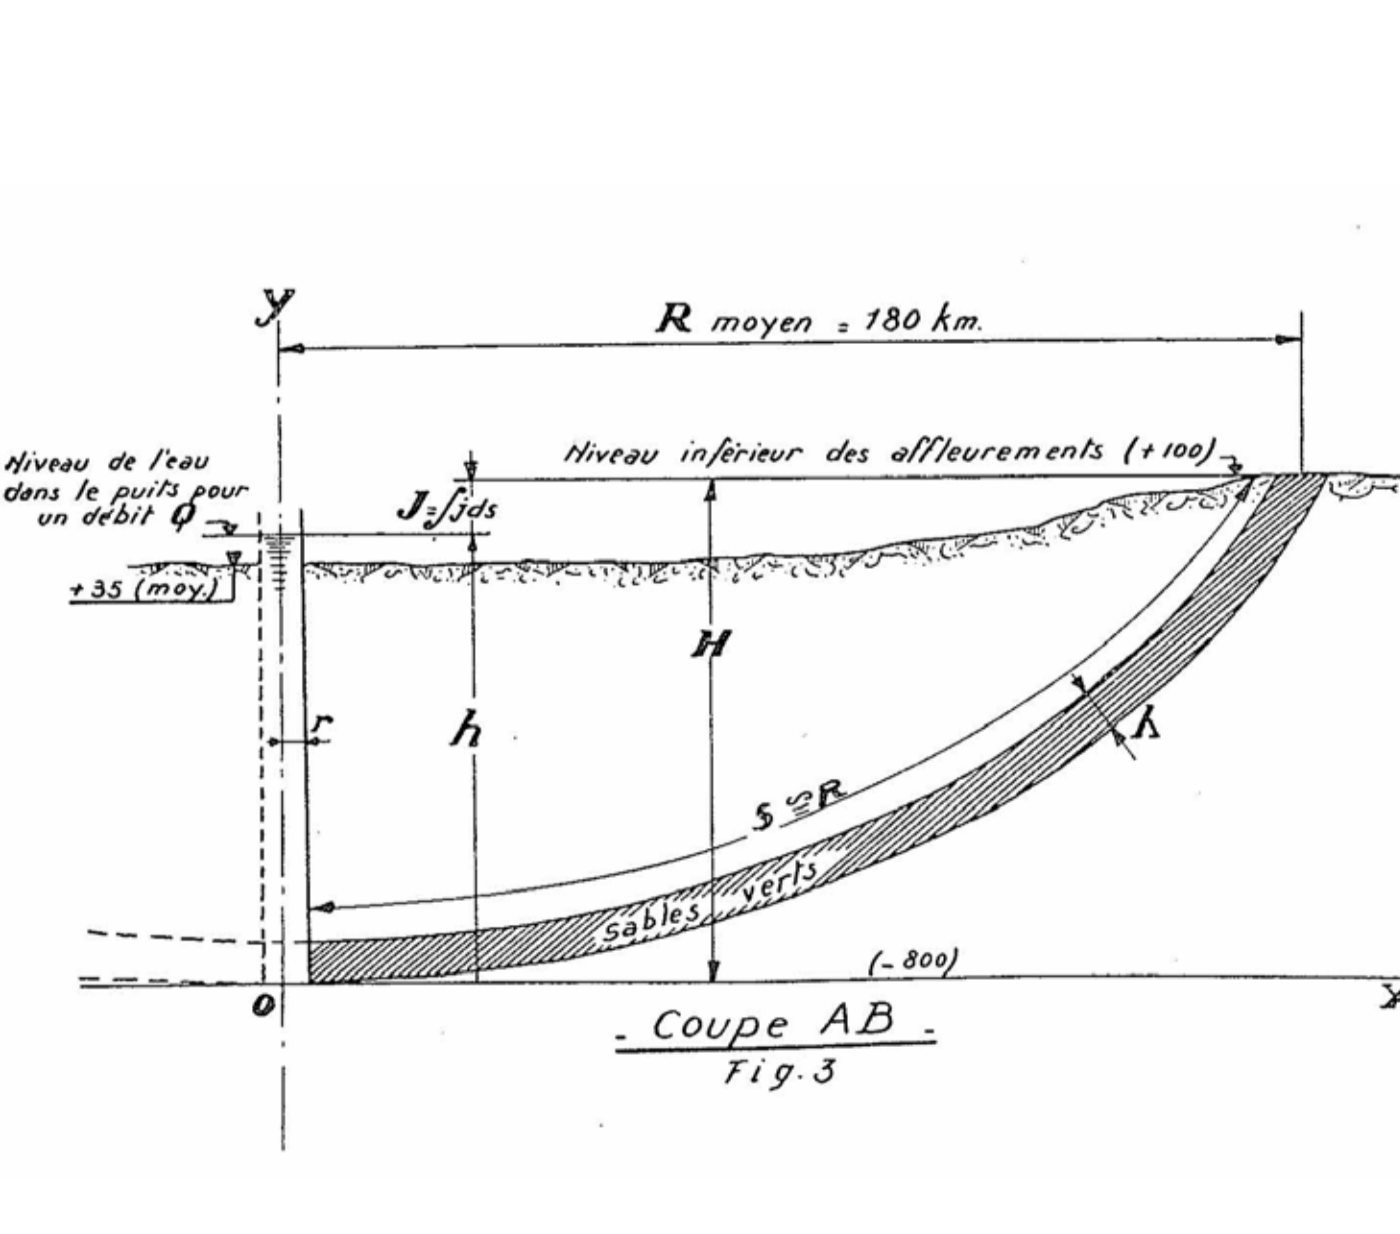

1956: Creation of the bilingual Bulletin

1957-58: IYG International Geophysical Year

1961: Creation of WMO Commission of Hydrometeorology, then Commission of Hydrology – IAHS official partner

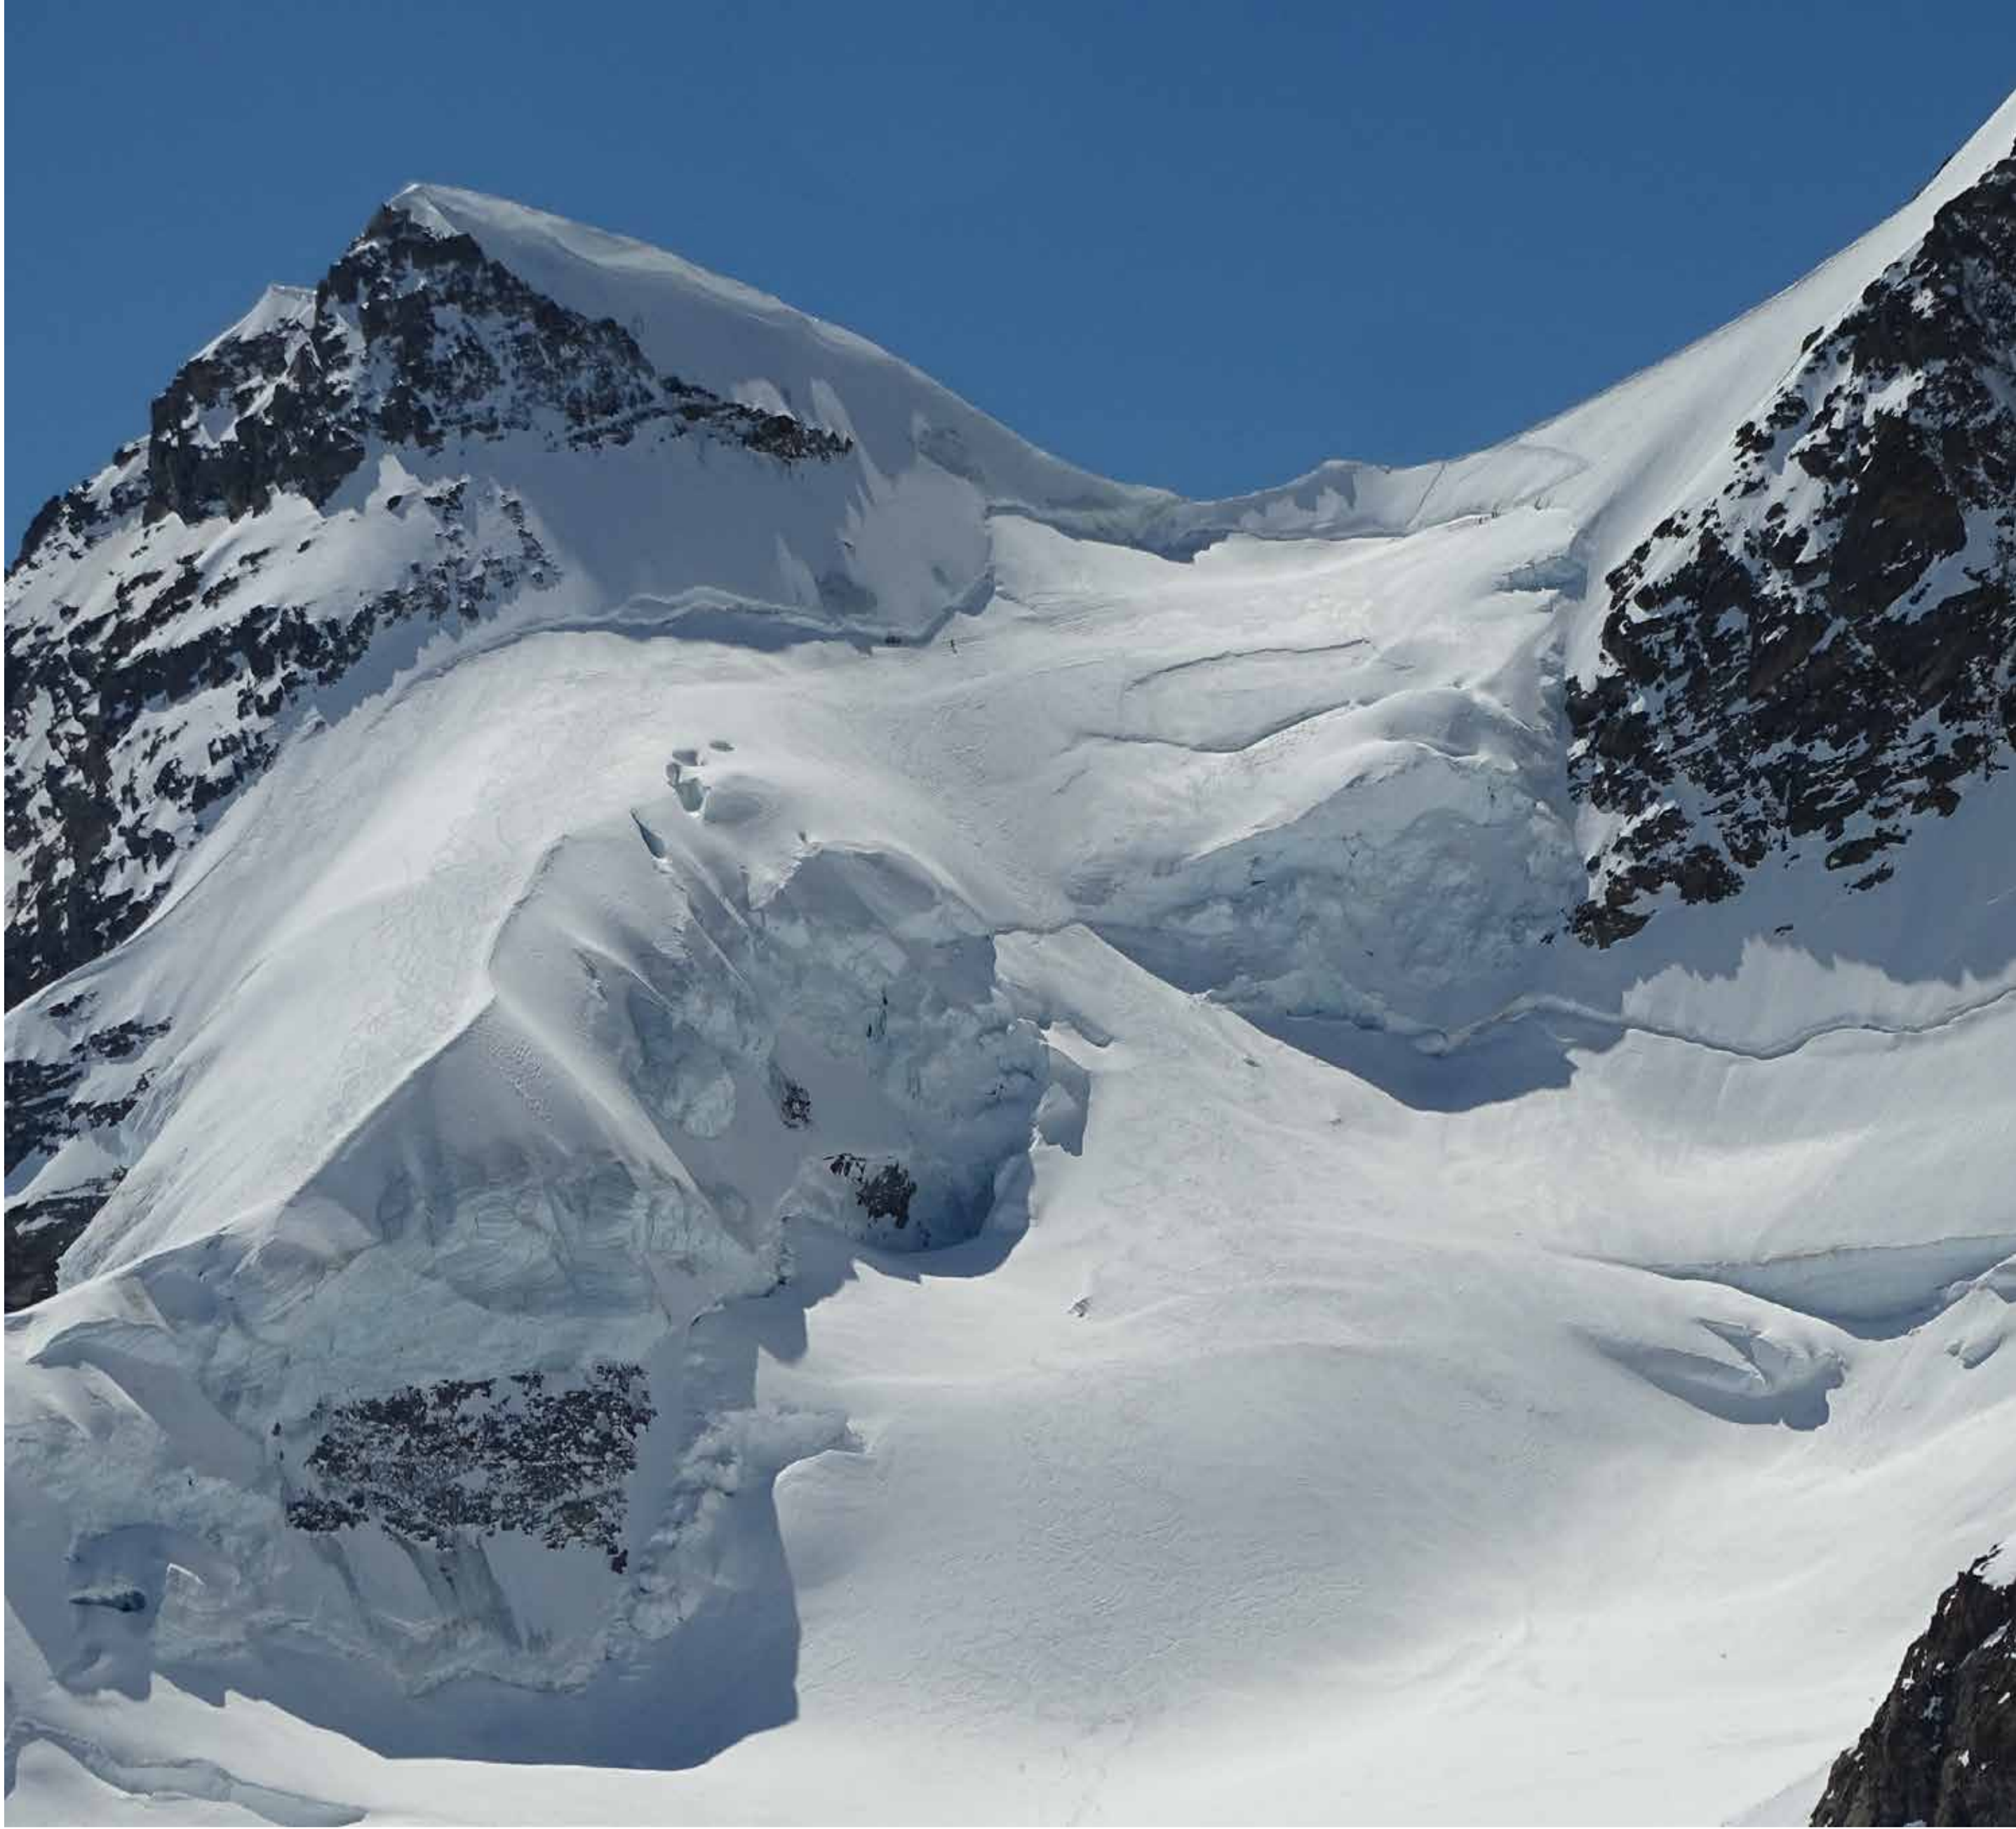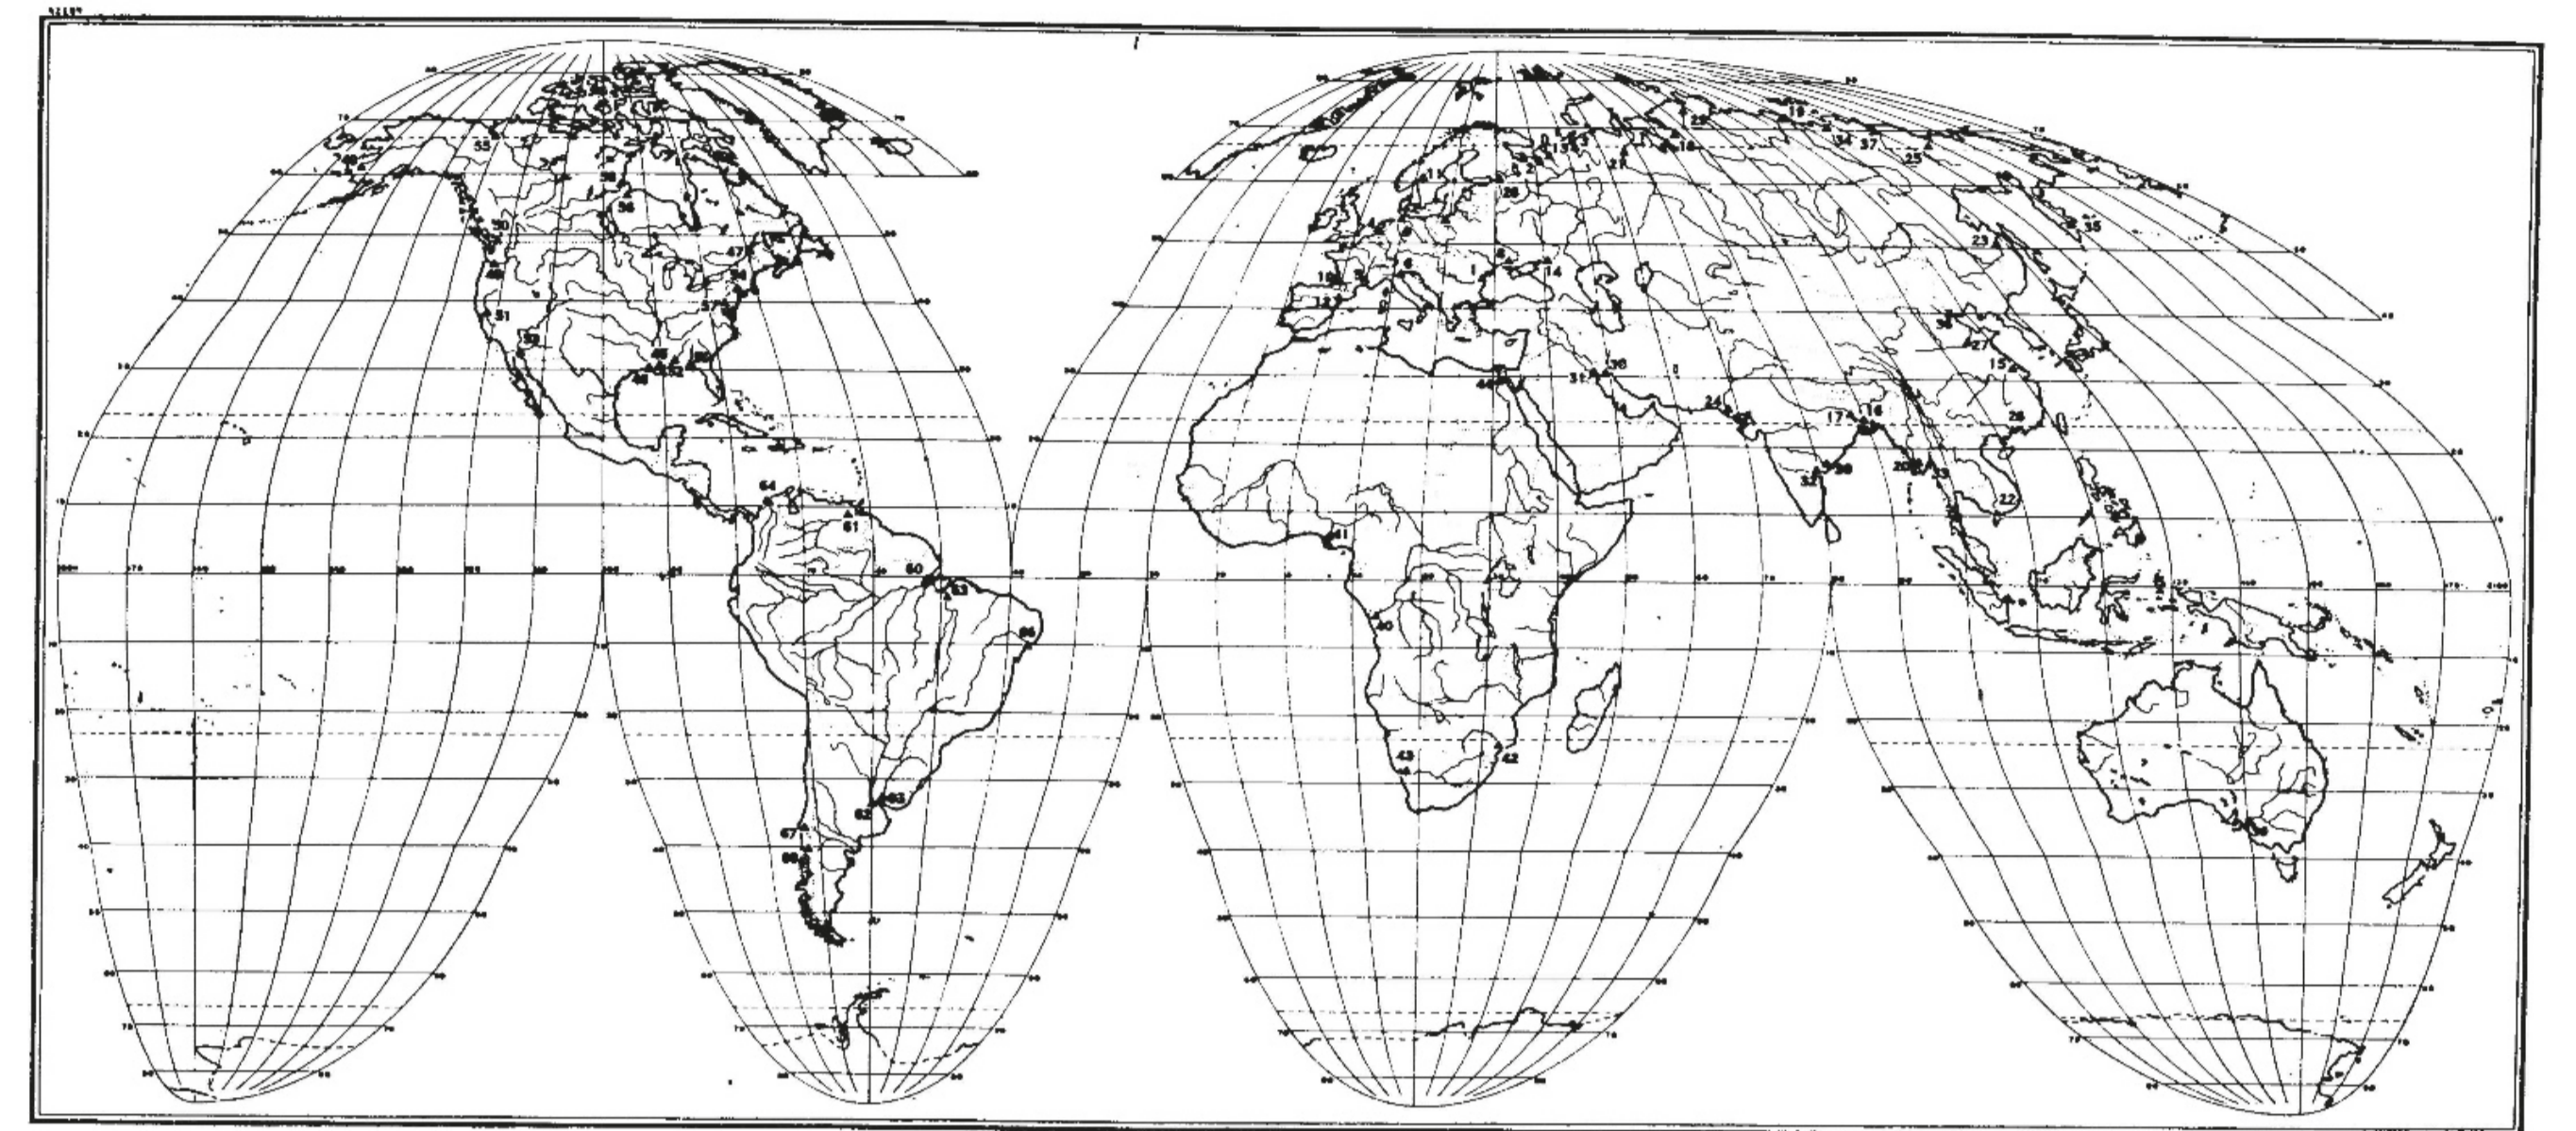

Sites selected for study of principal rivers of the world

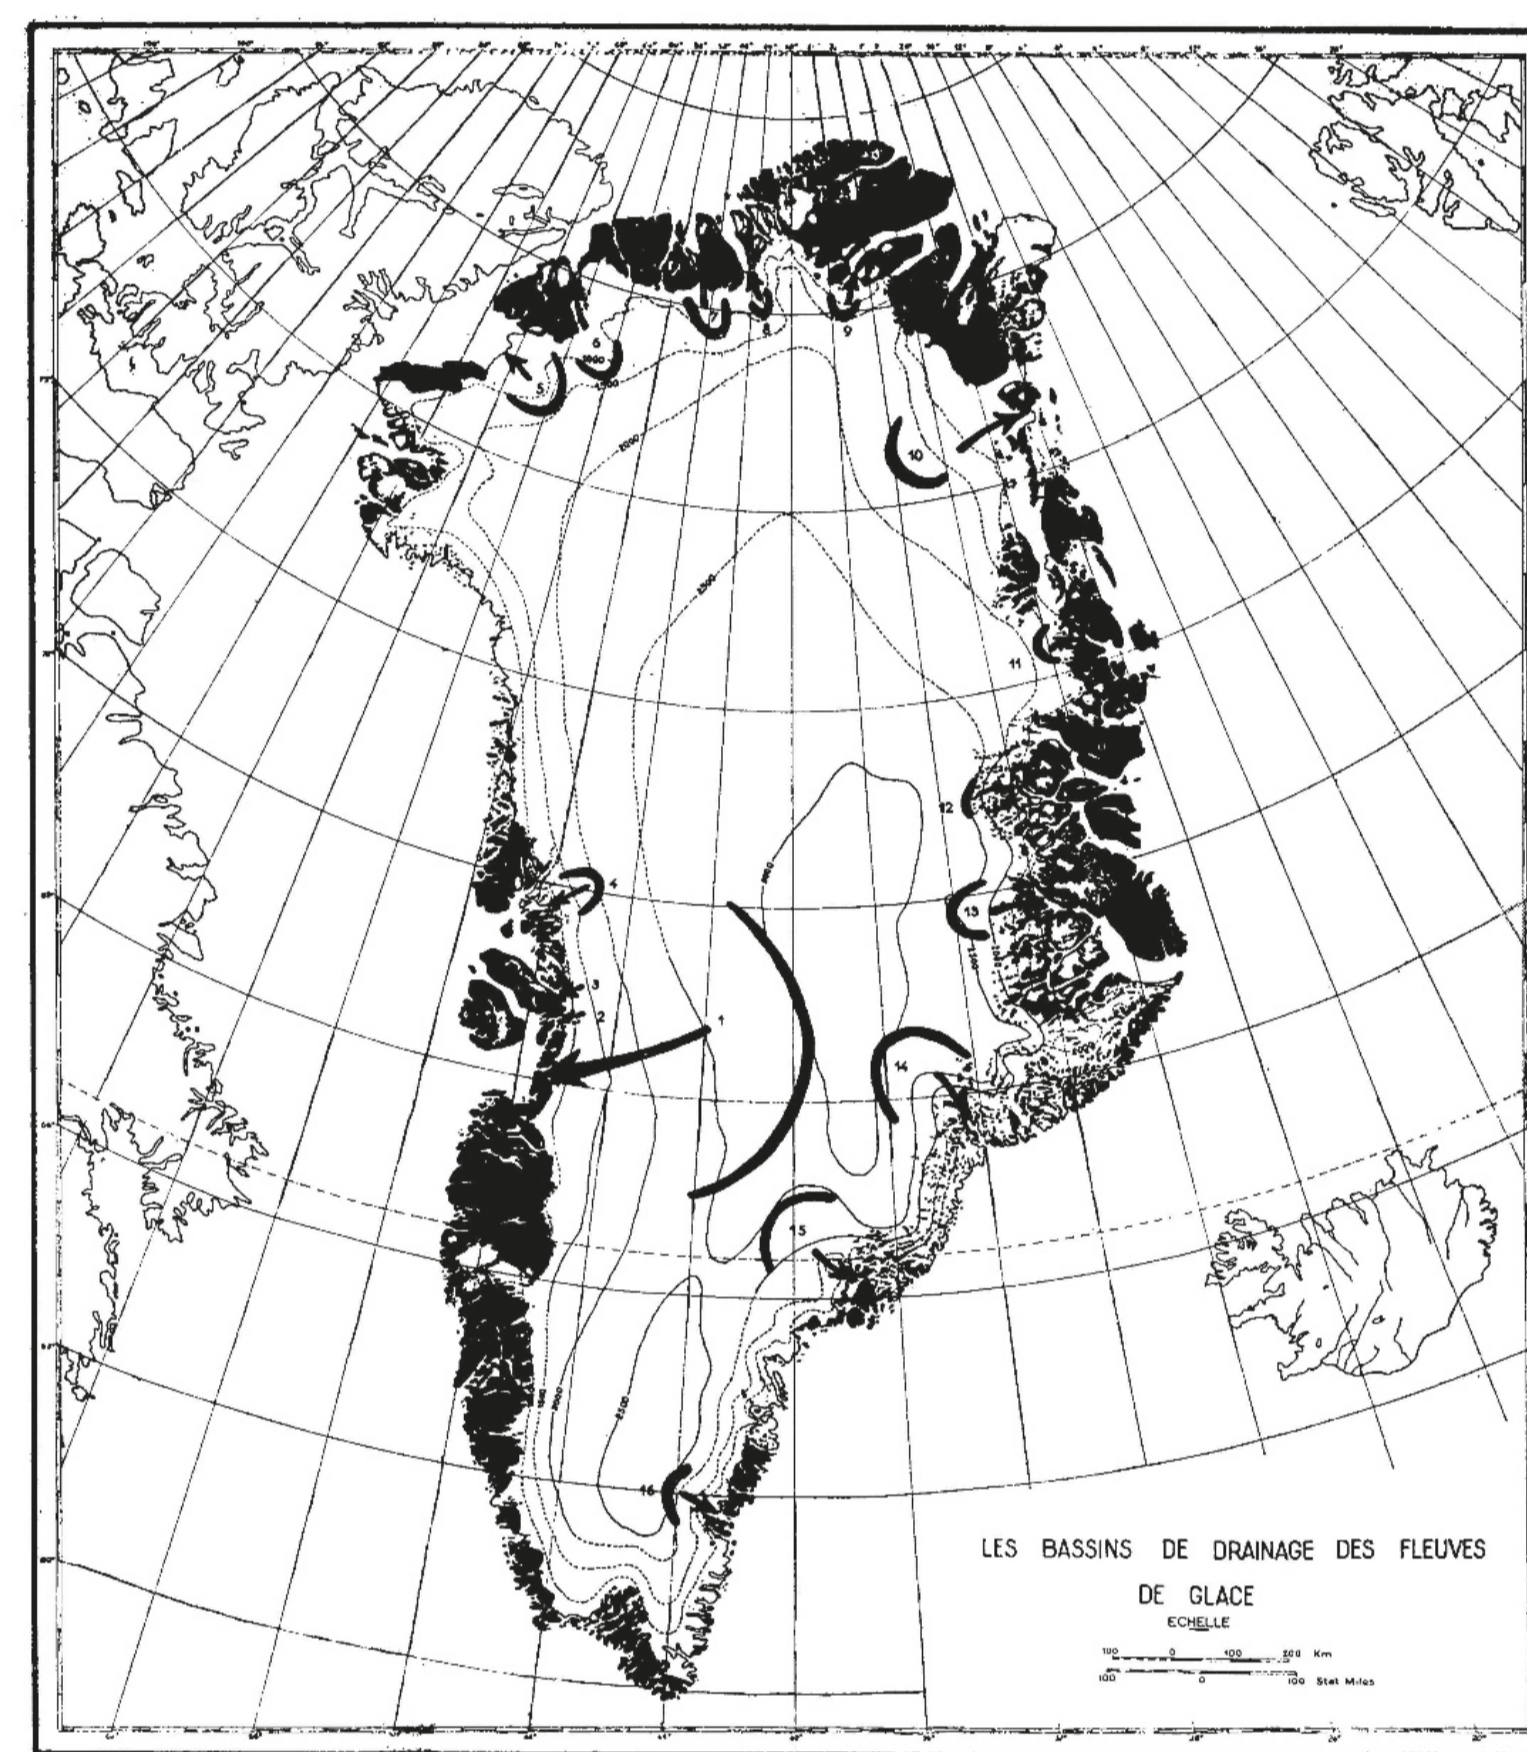

Fig. 1 — Les bassins de drainage des fleuves de glace. (D'après la carte au 1/5,000,000 du Geodactisk Institut, København).

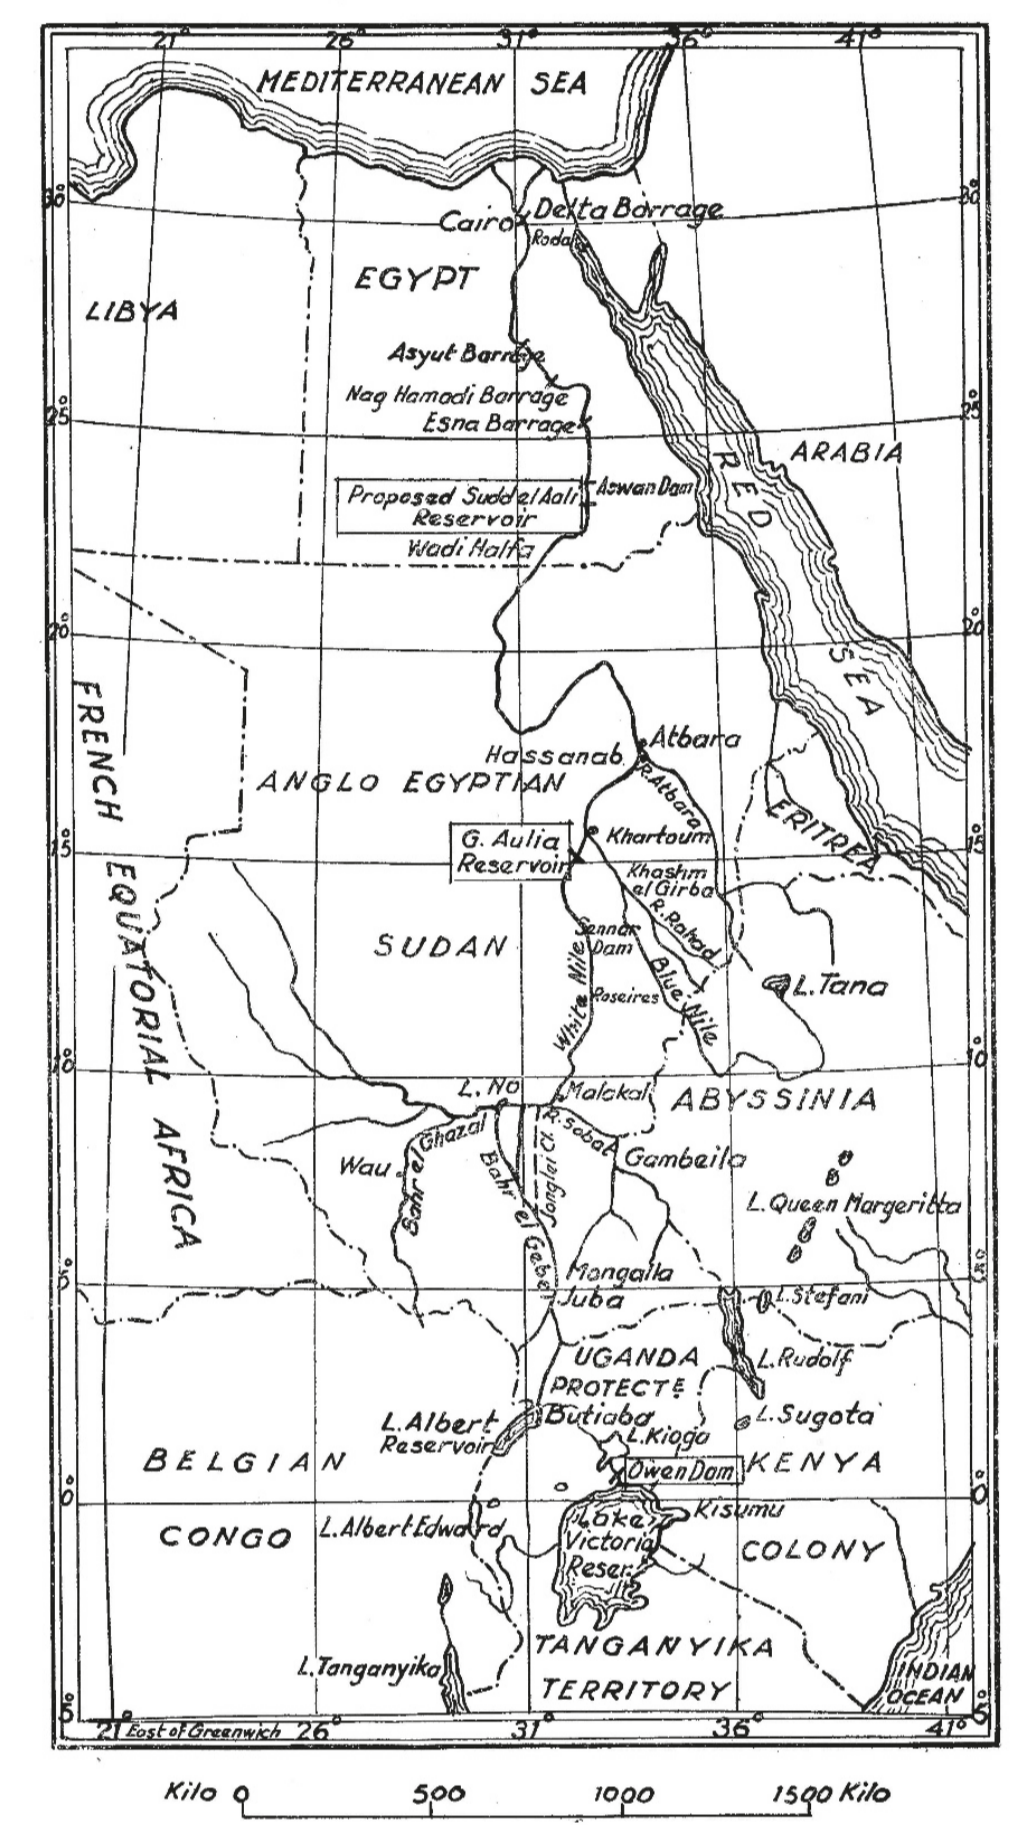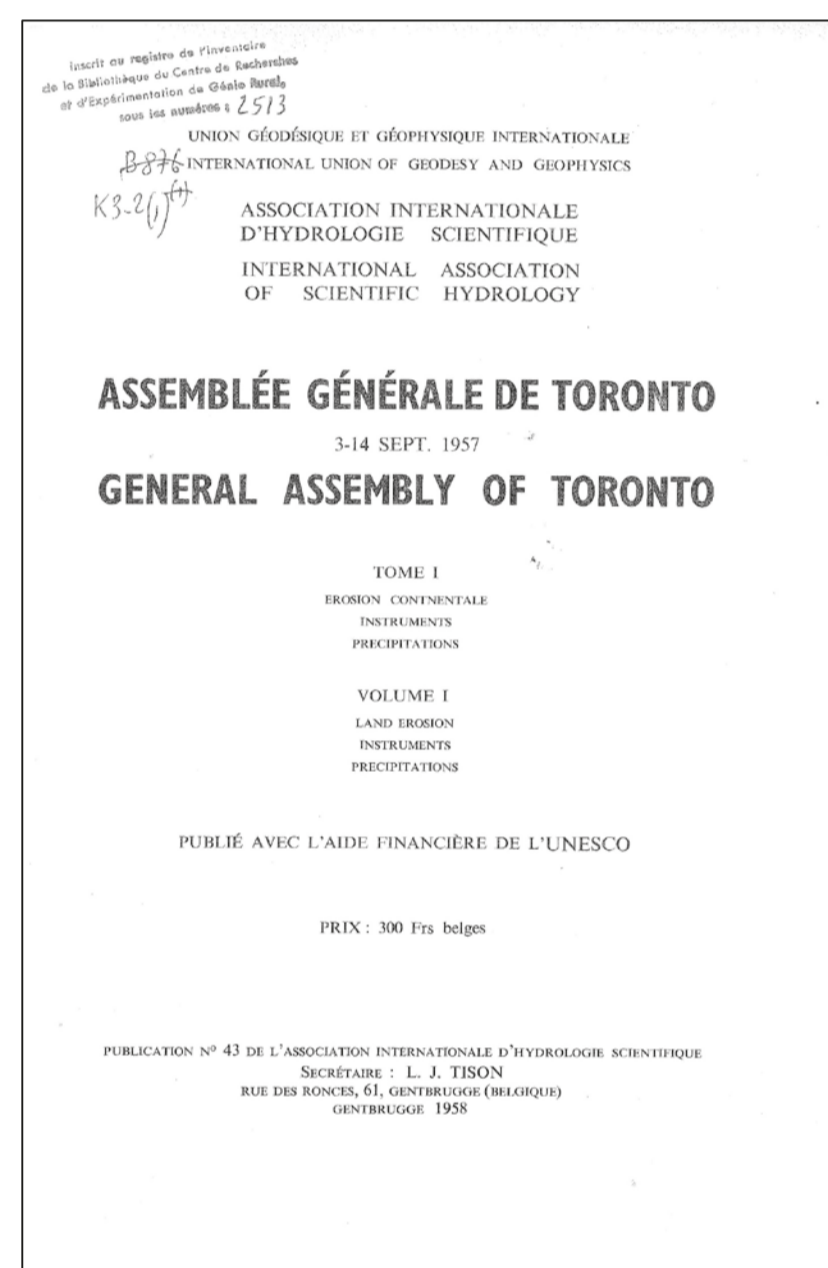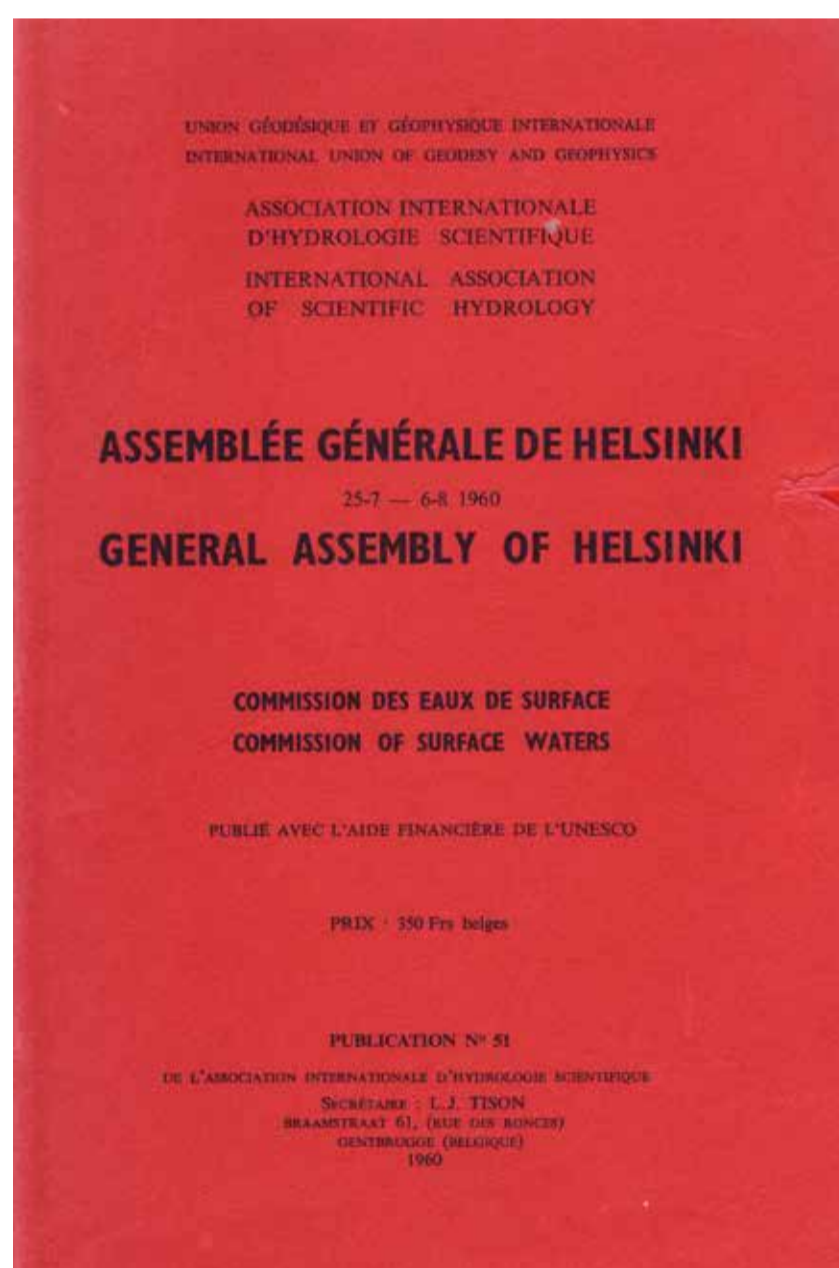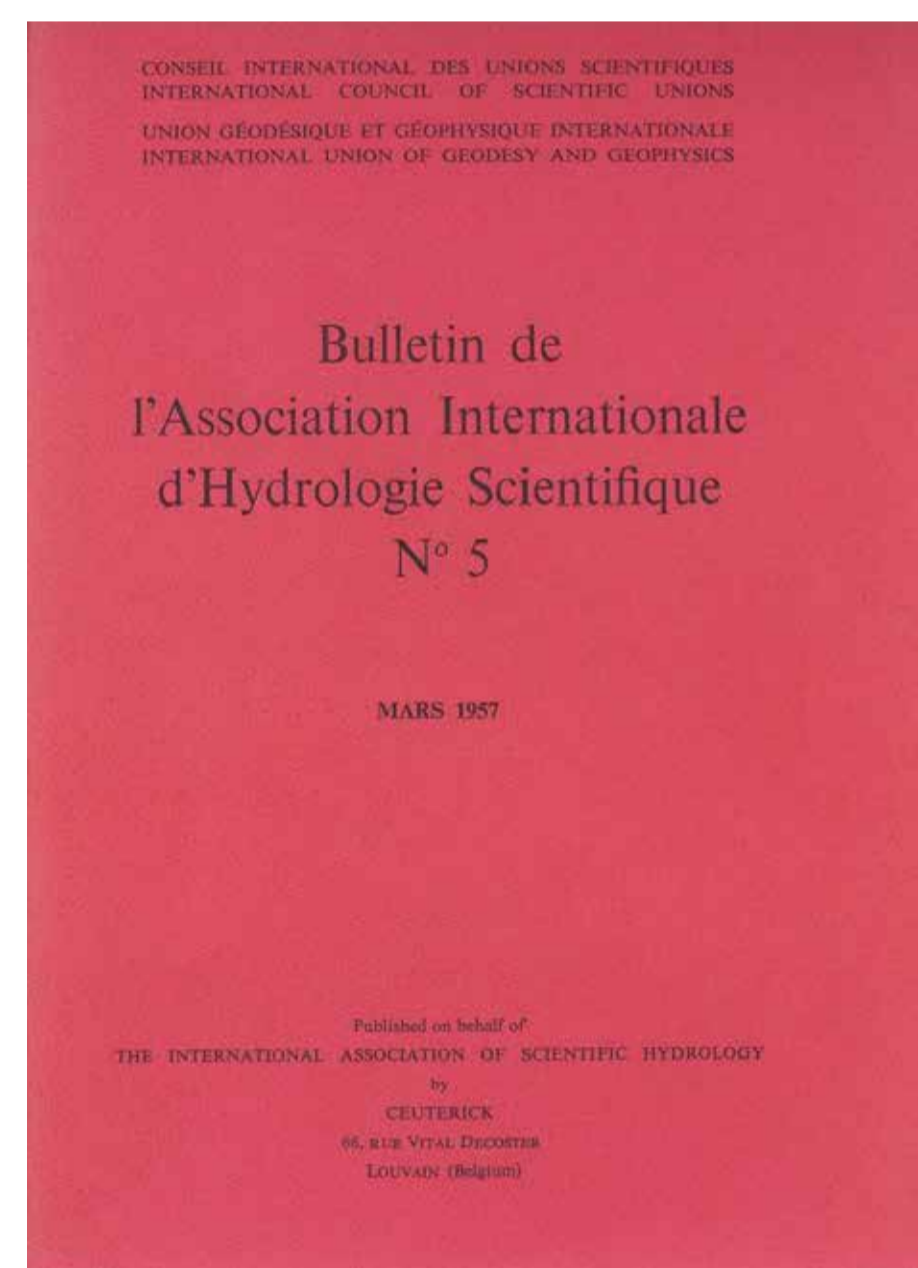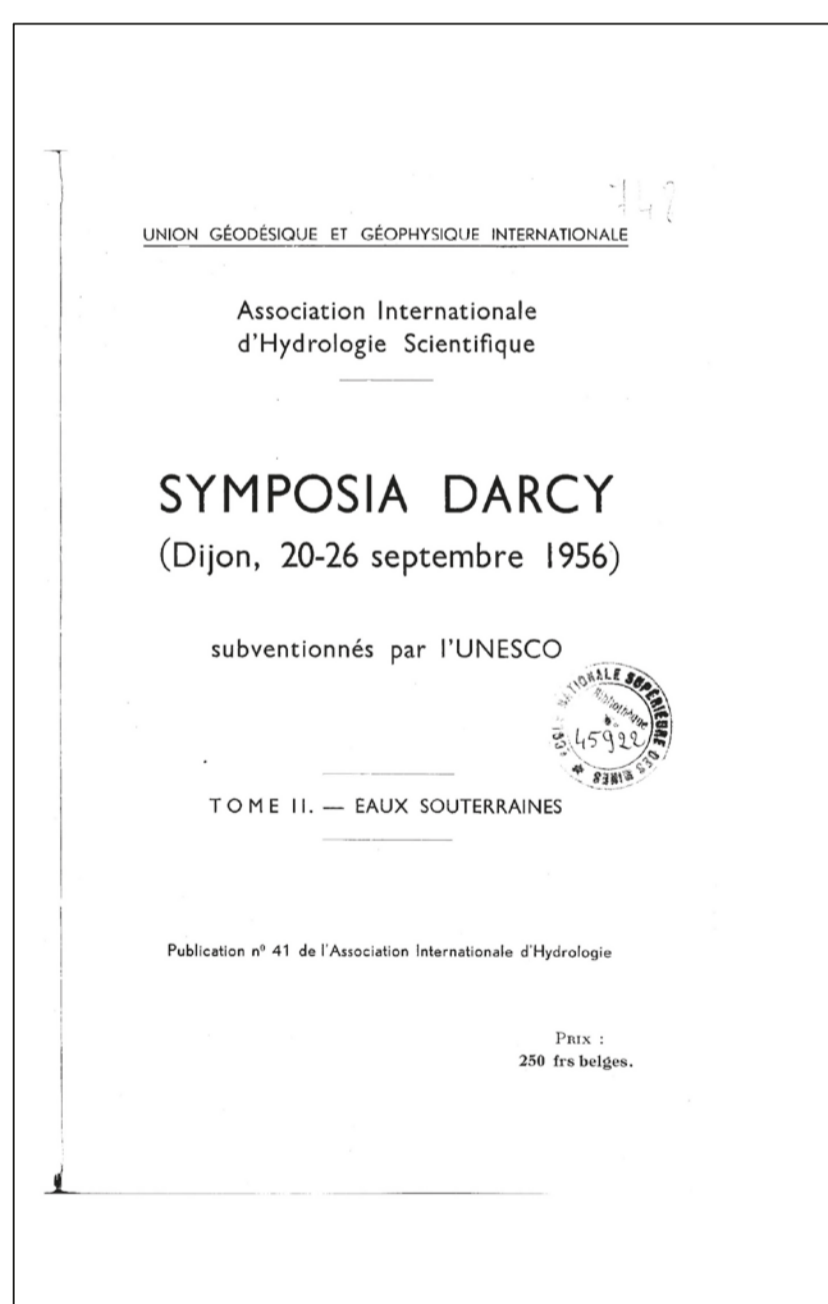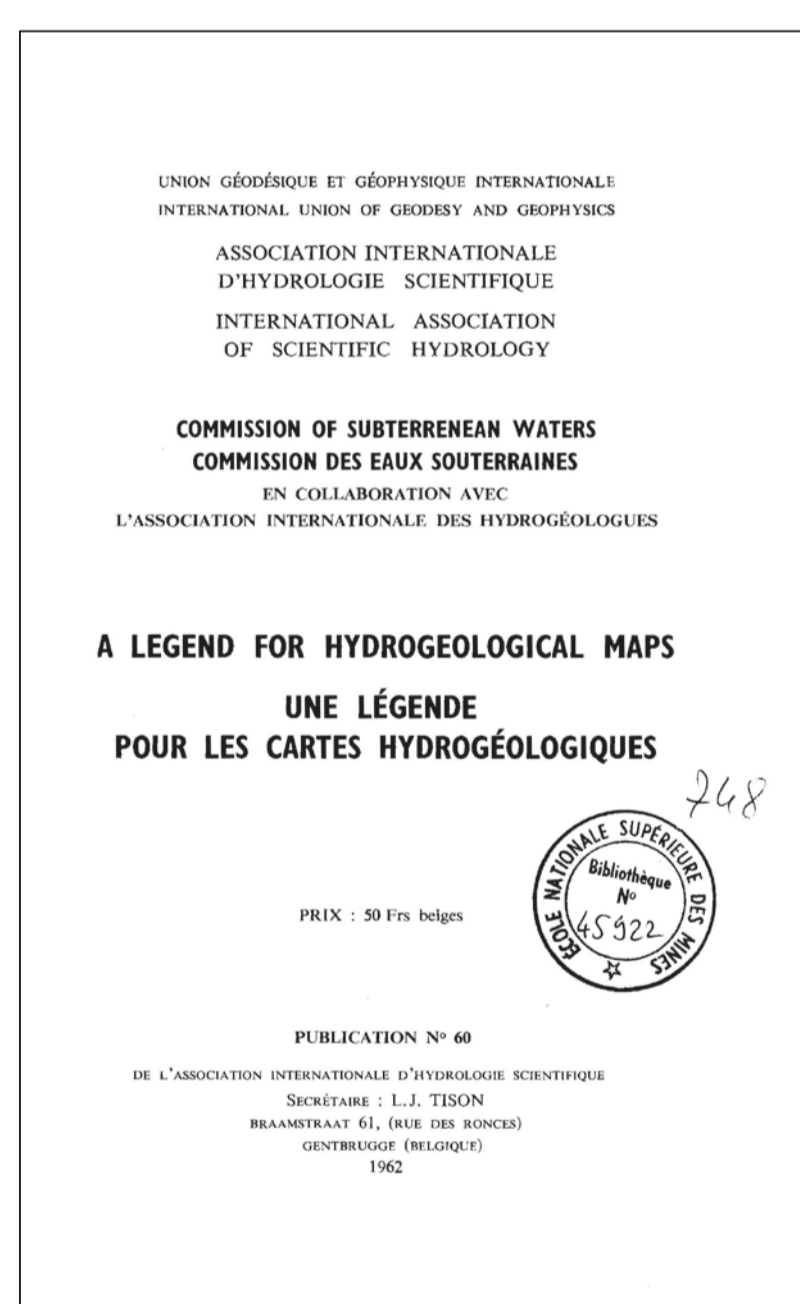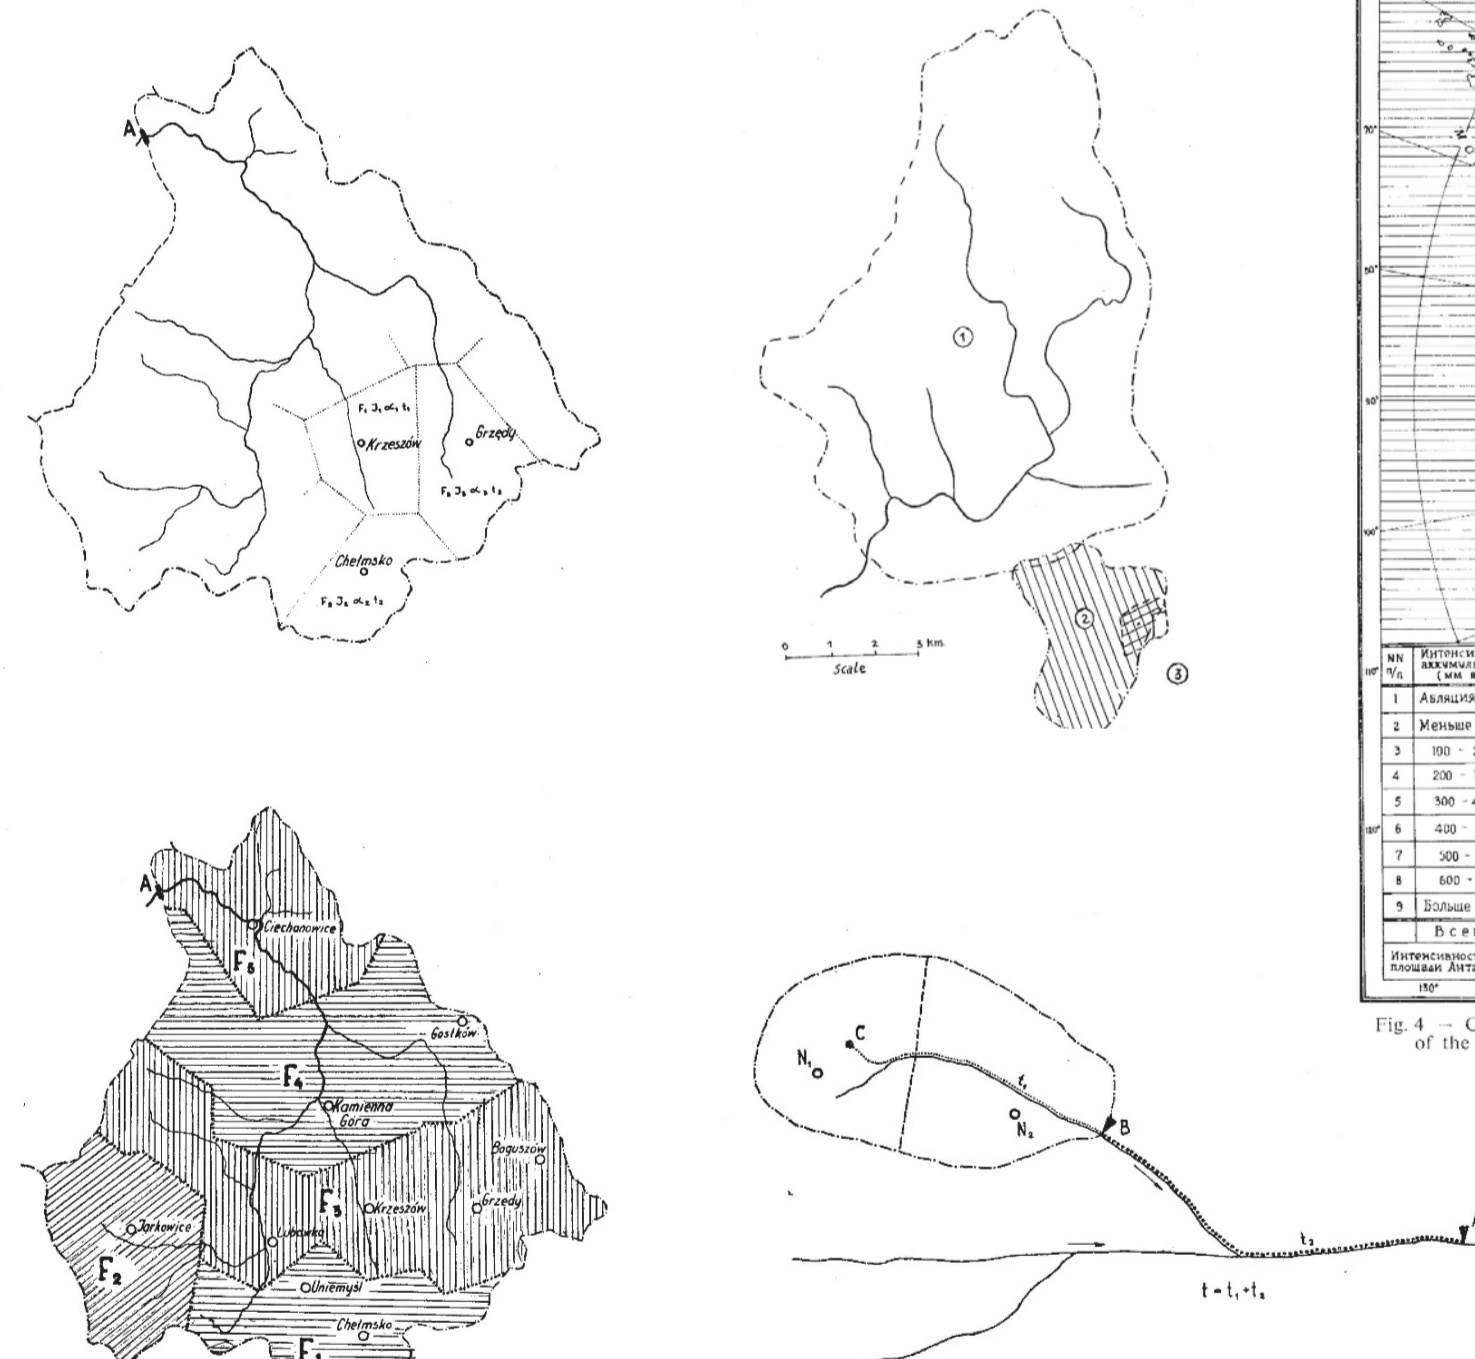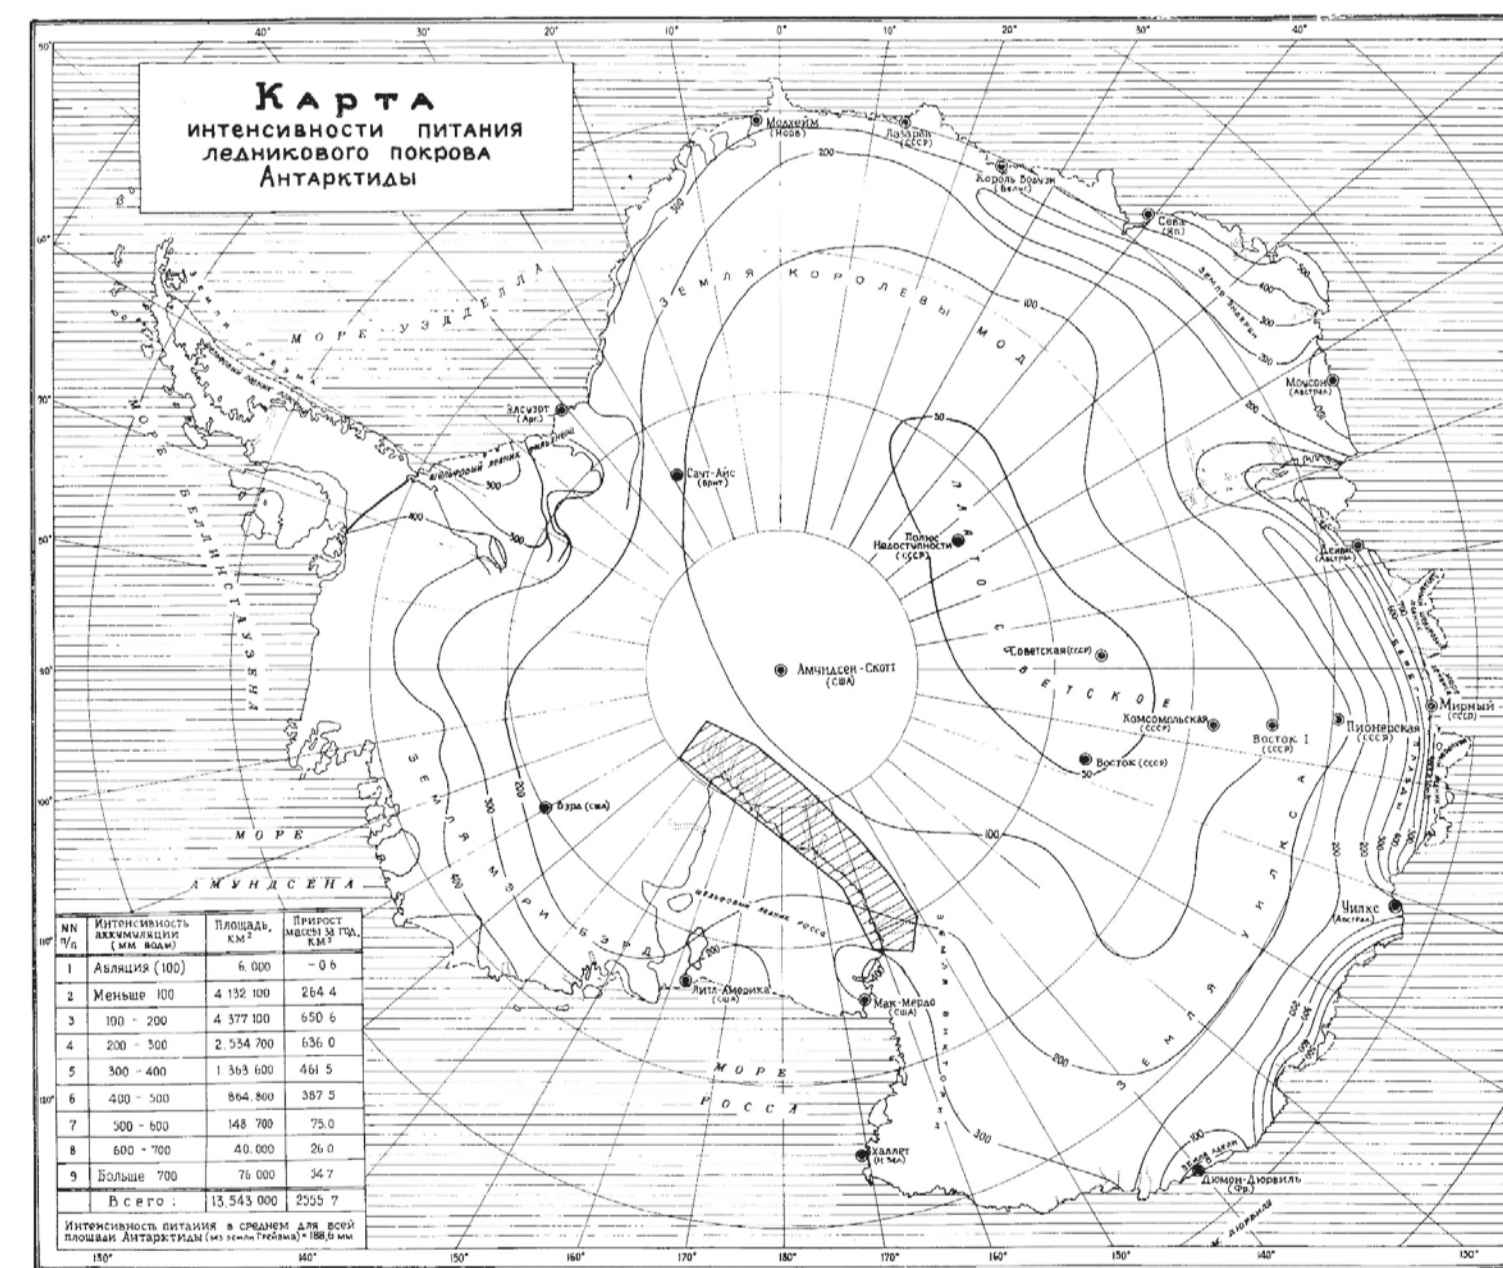

Fig. 4 — Carte de l'intensité de neutralisation de la banquise antarctique. Symboles conventionnels: 1 — zones d'accumulation; 2 — zones d'érosion; 3 — zones d'accumulation et d'érosion.

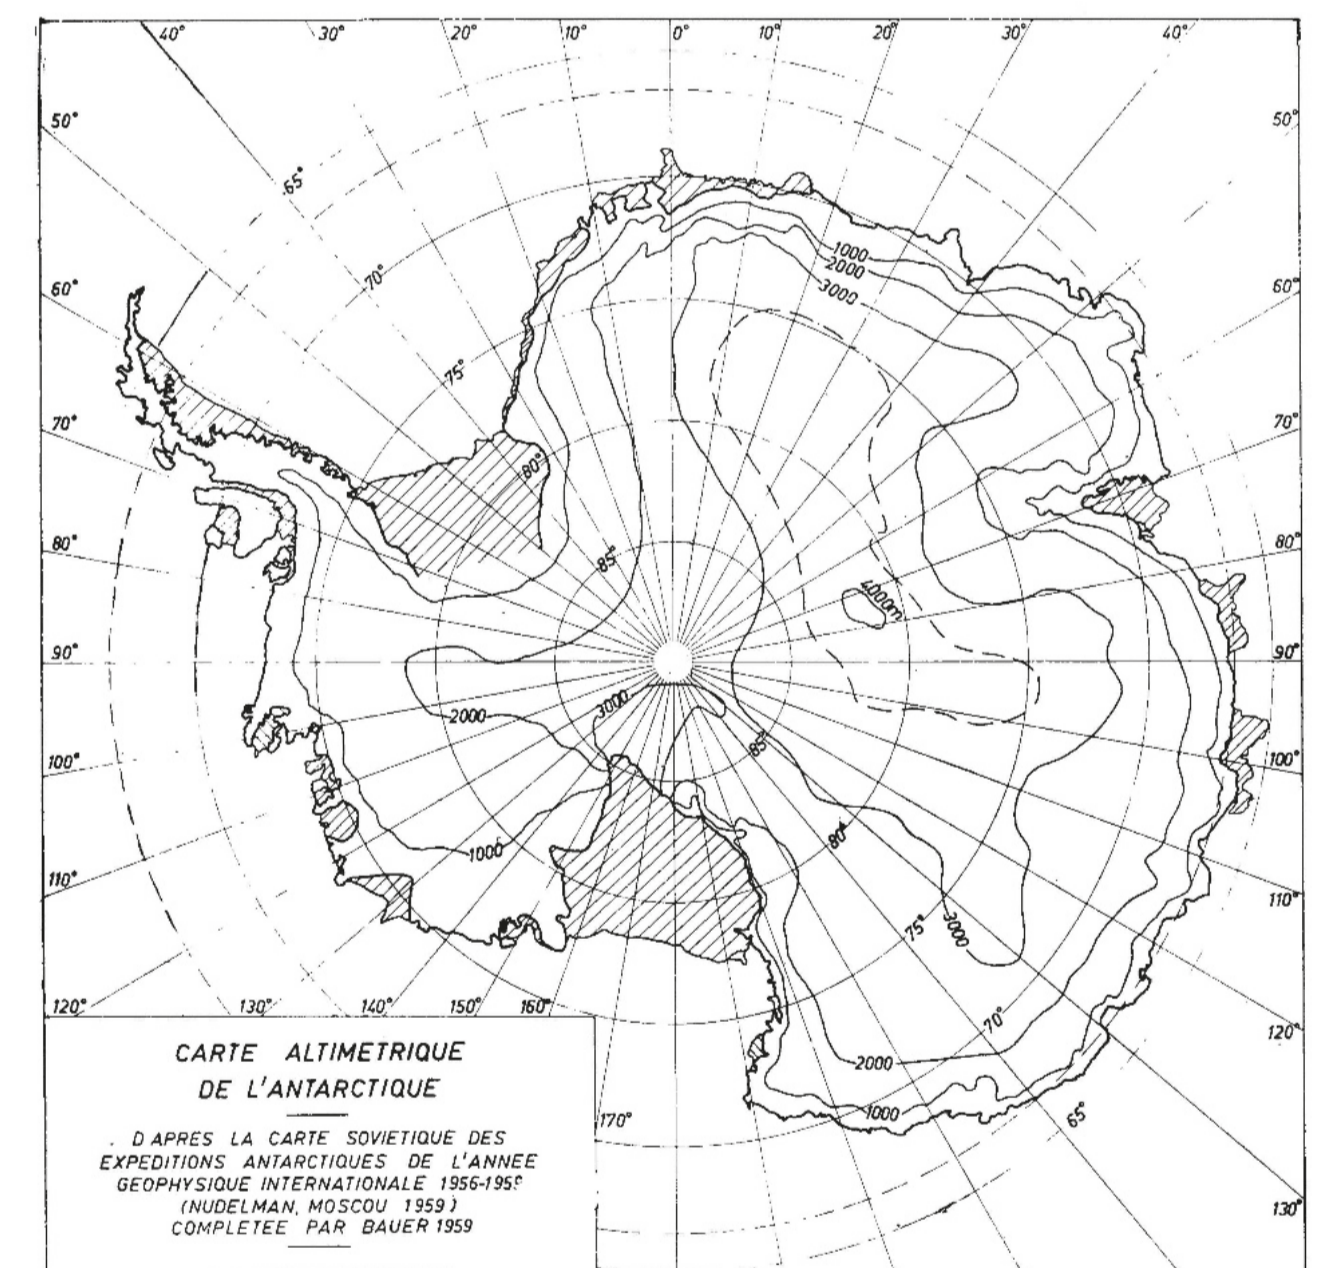

Fig. 4 — Carte de l'intensité de neutralisation de la banquise antarctique. Symboles conventionnels: 1 — zones d'accumulation; 2 — zones d'érosion; 3 — zones d'accumulation et d'érosion.

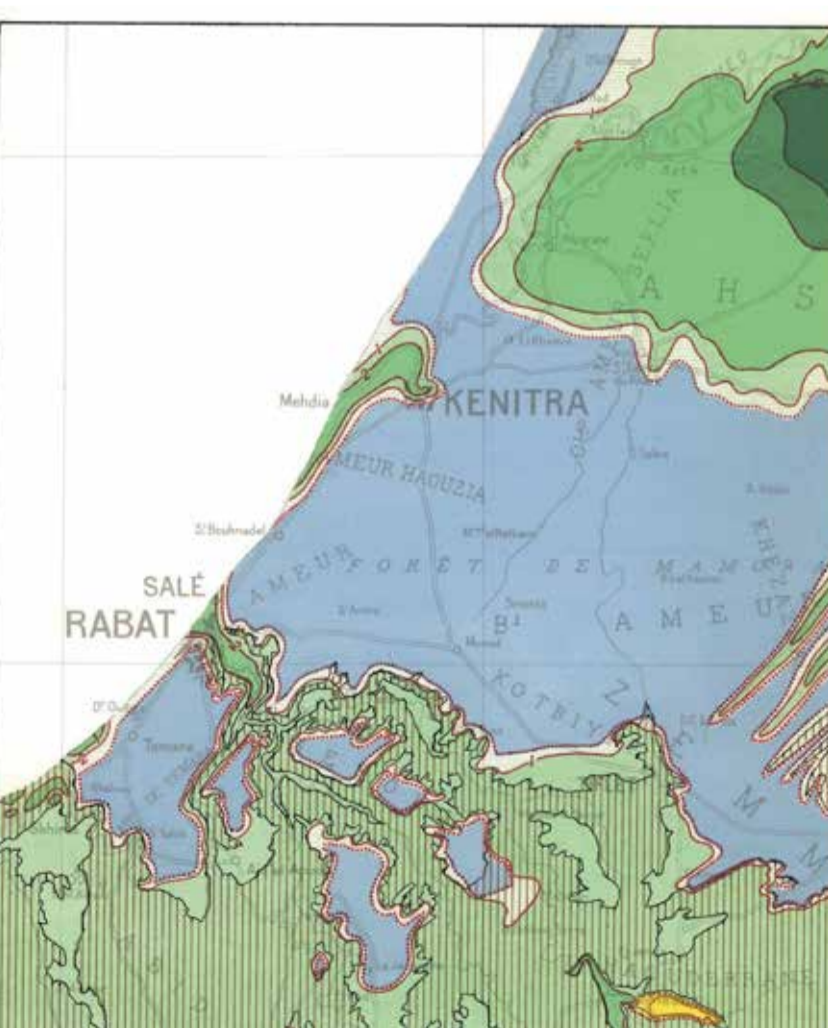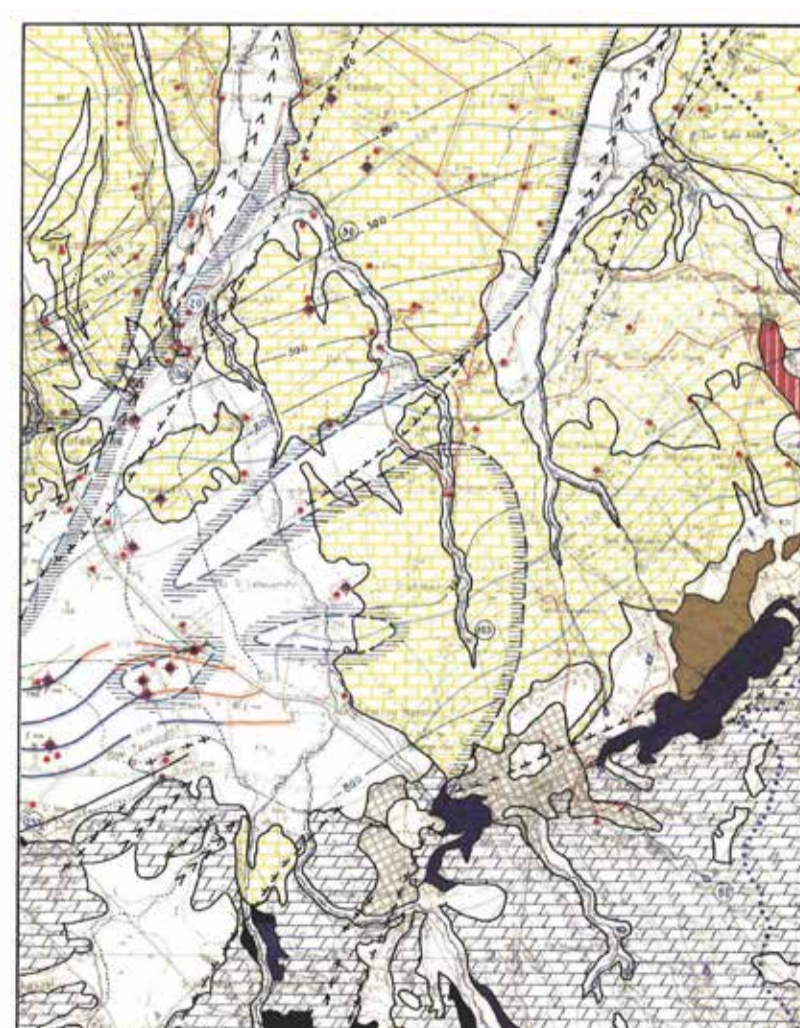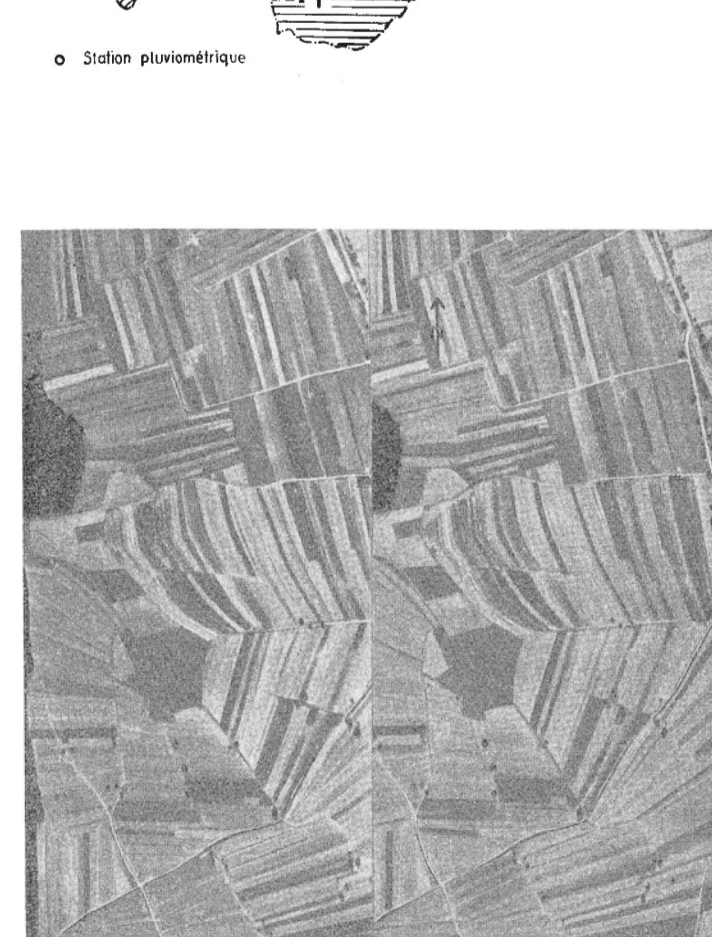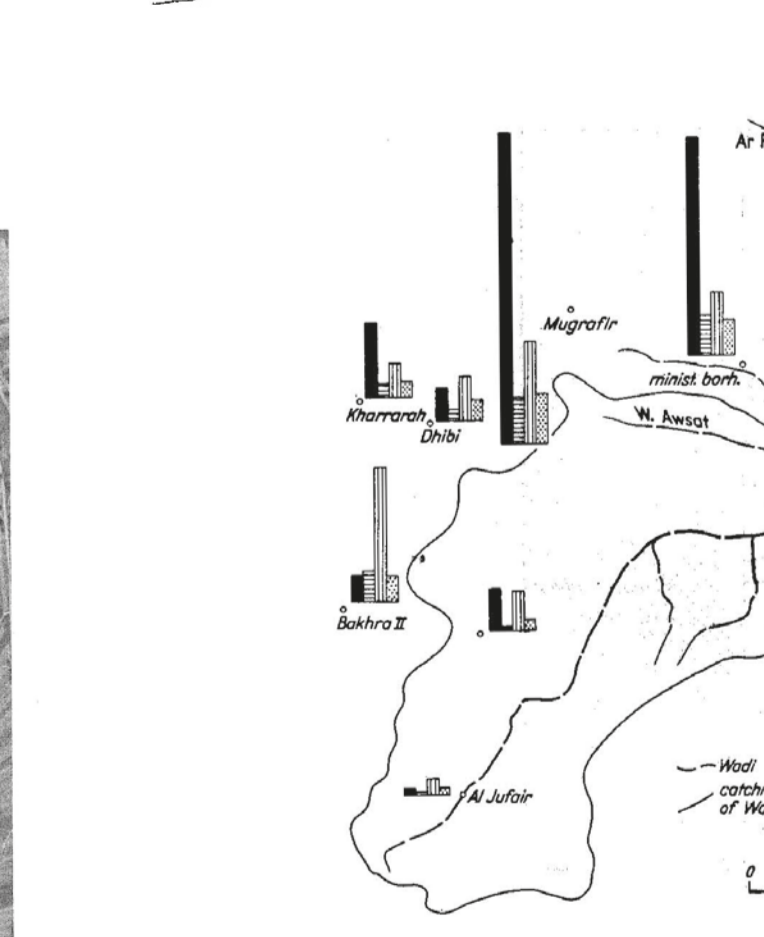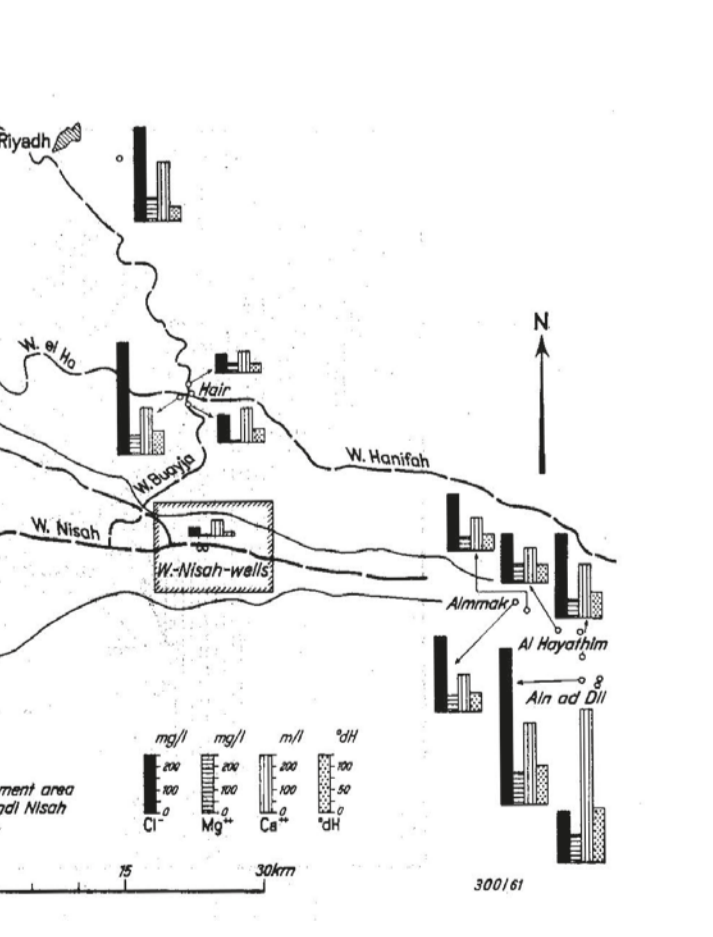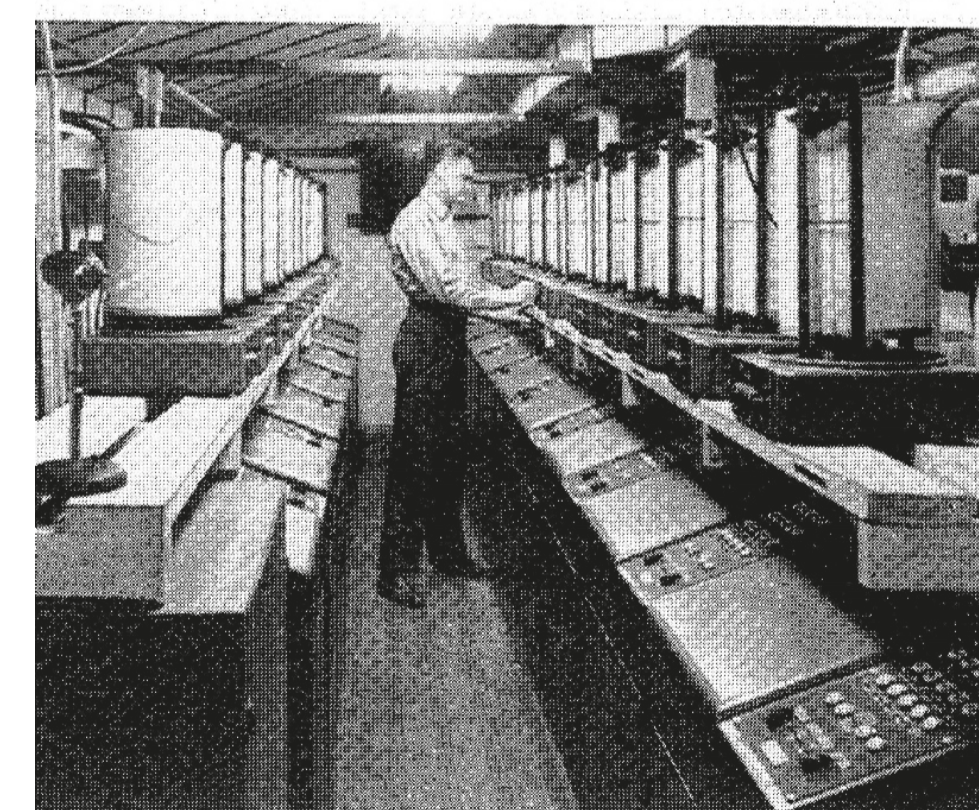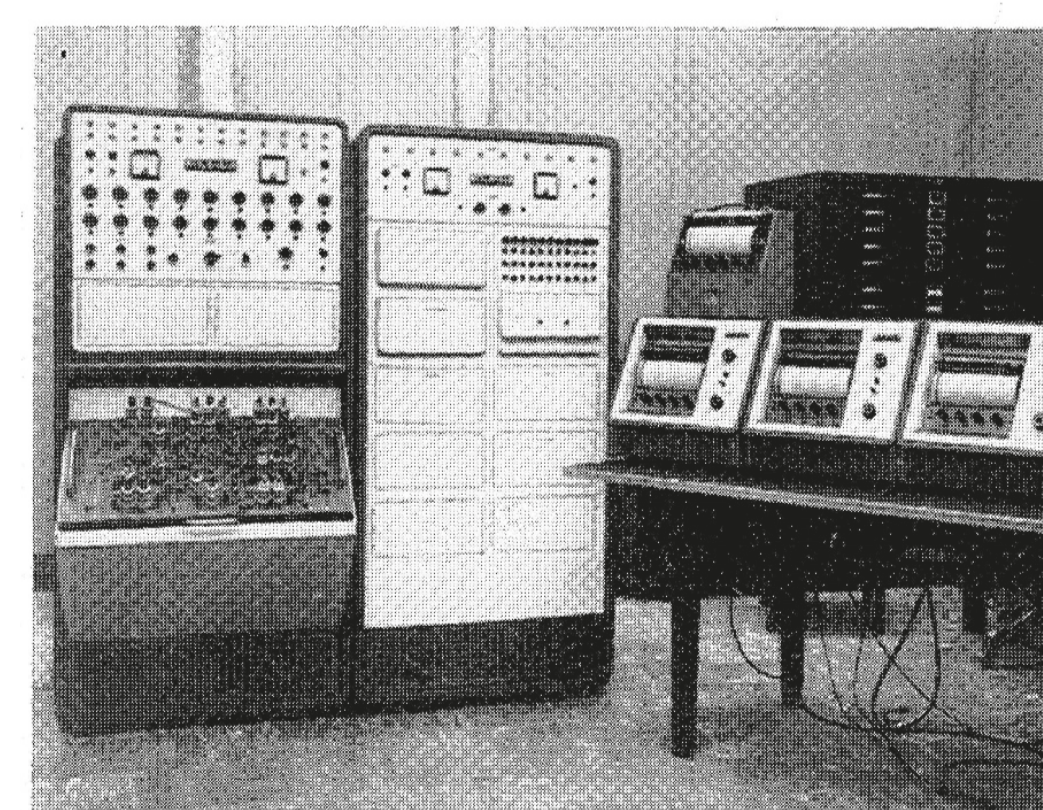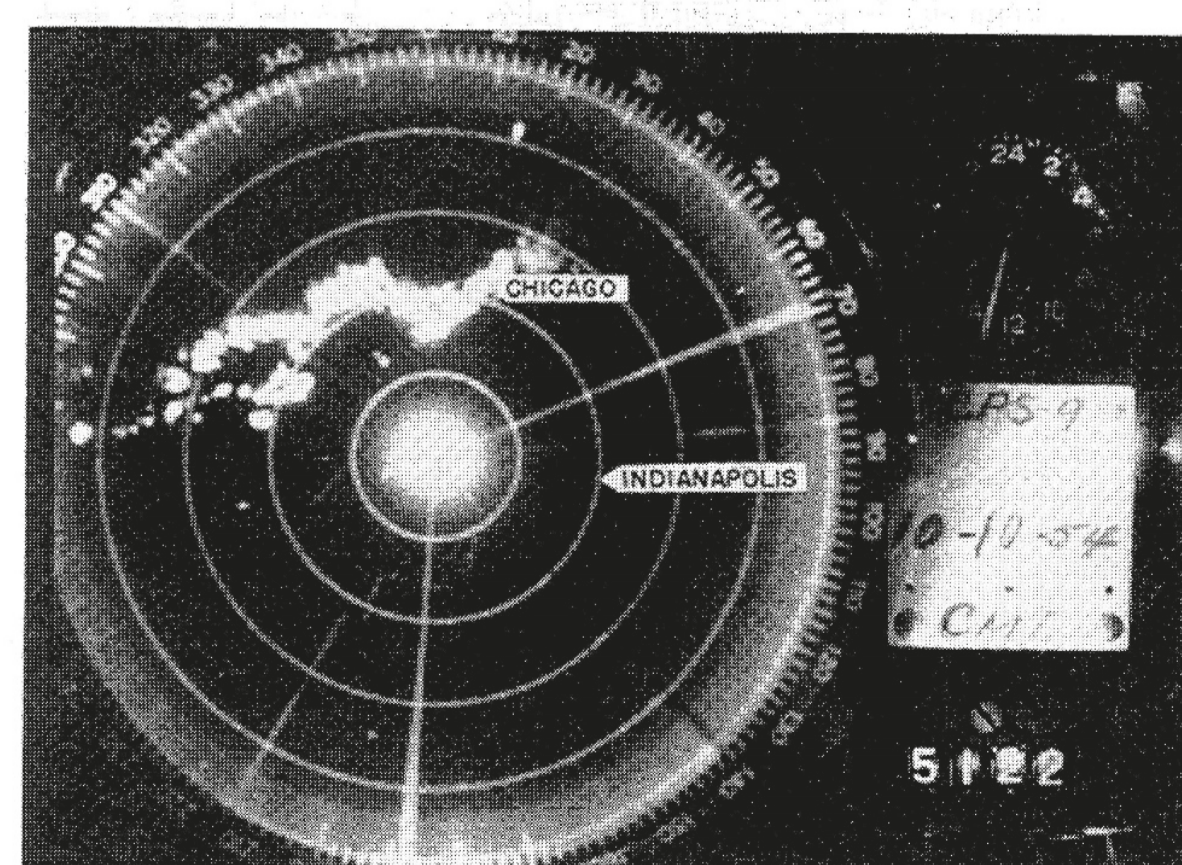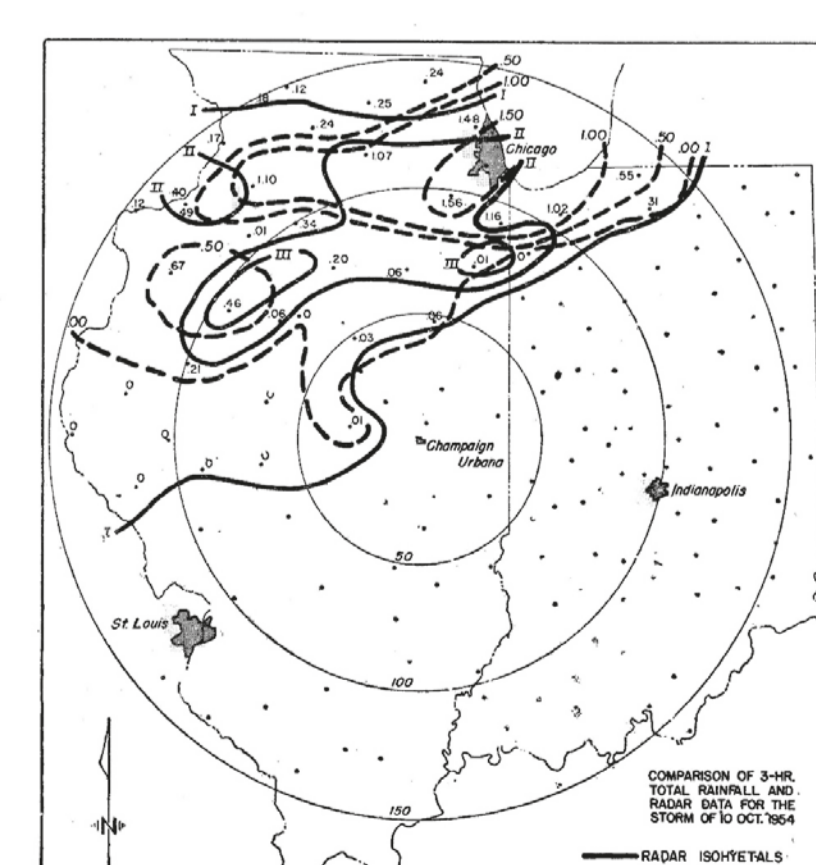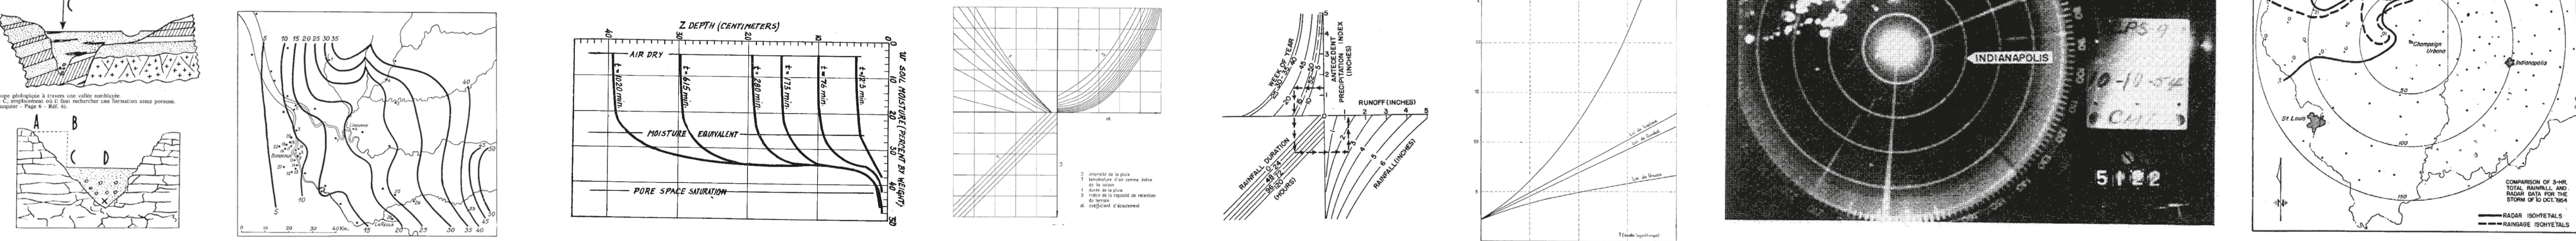

## 1971 Renaming: the International Association of Hydrological Sciences / L'Association Internationale des Sciences Hydrologiques

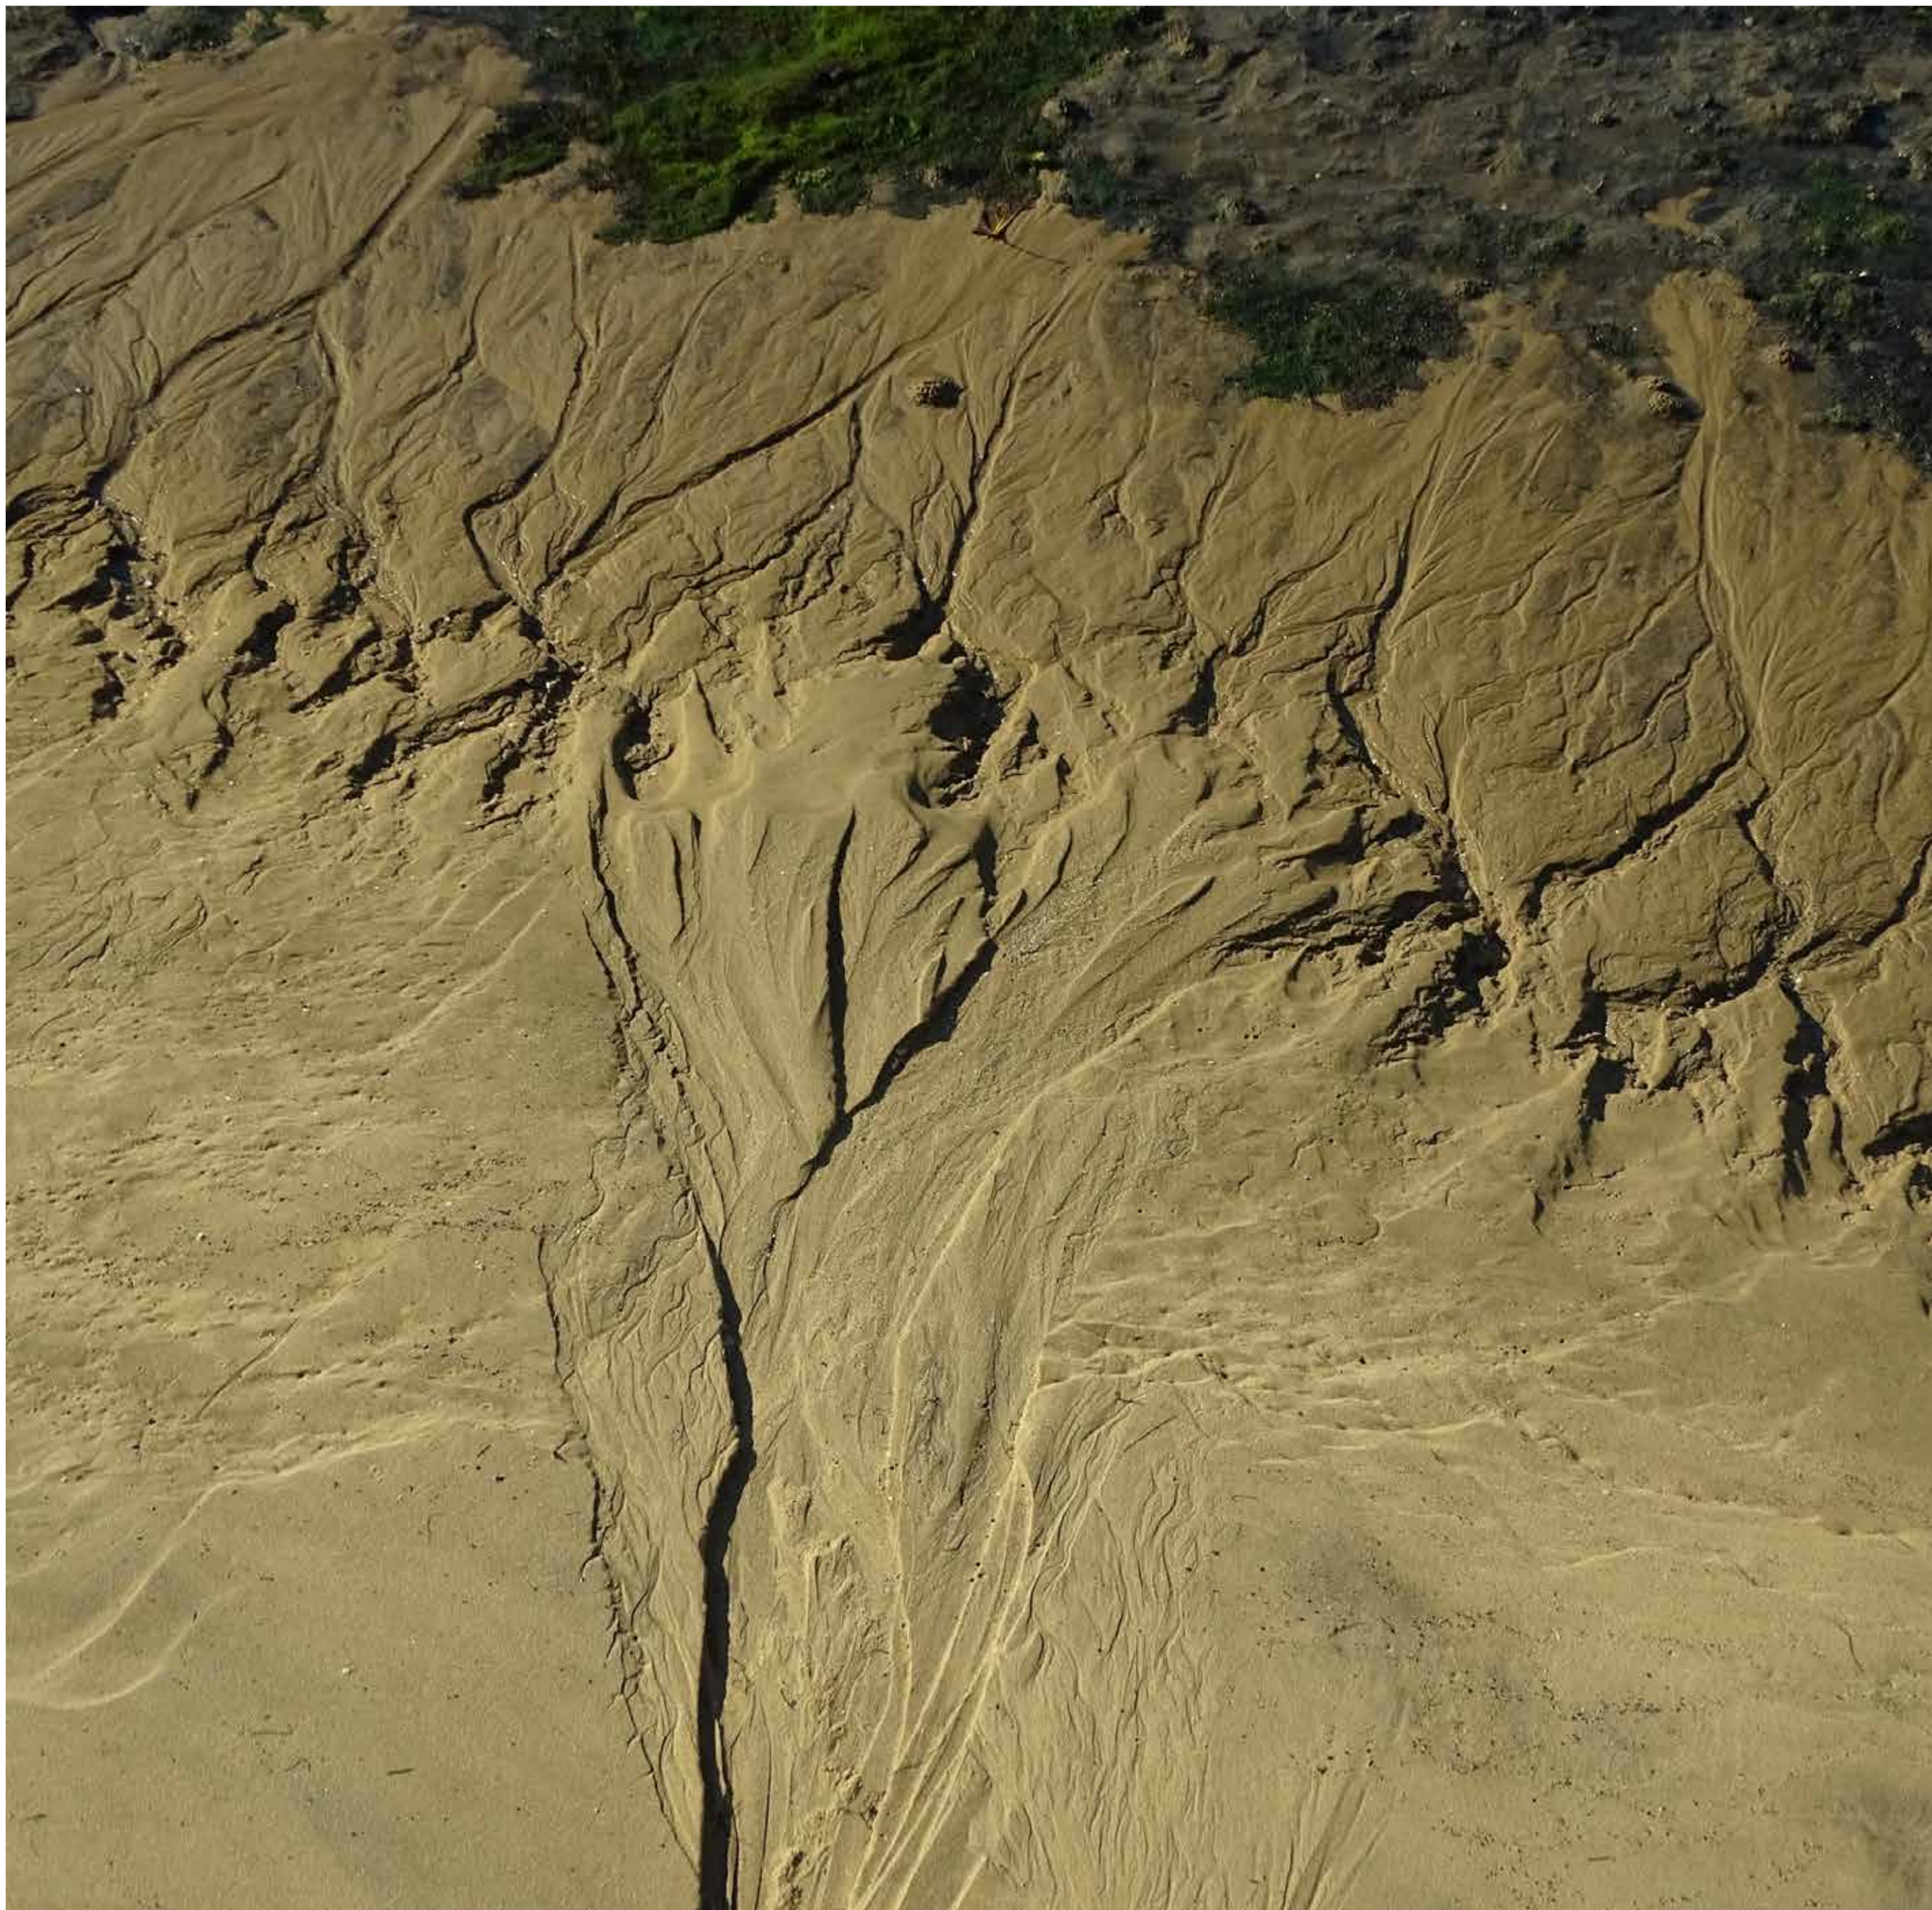

## 1965-1974 The International Hydrological Decade

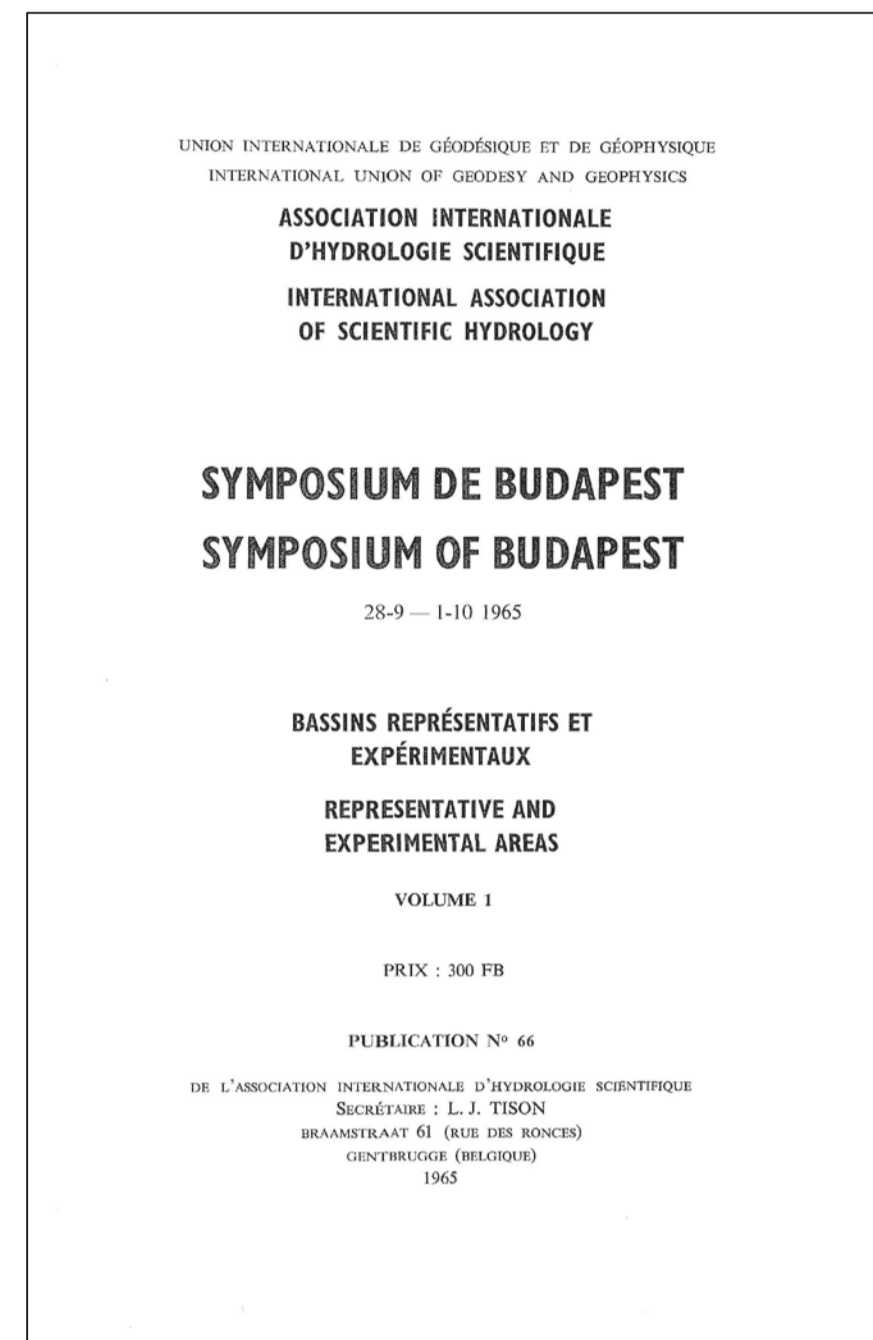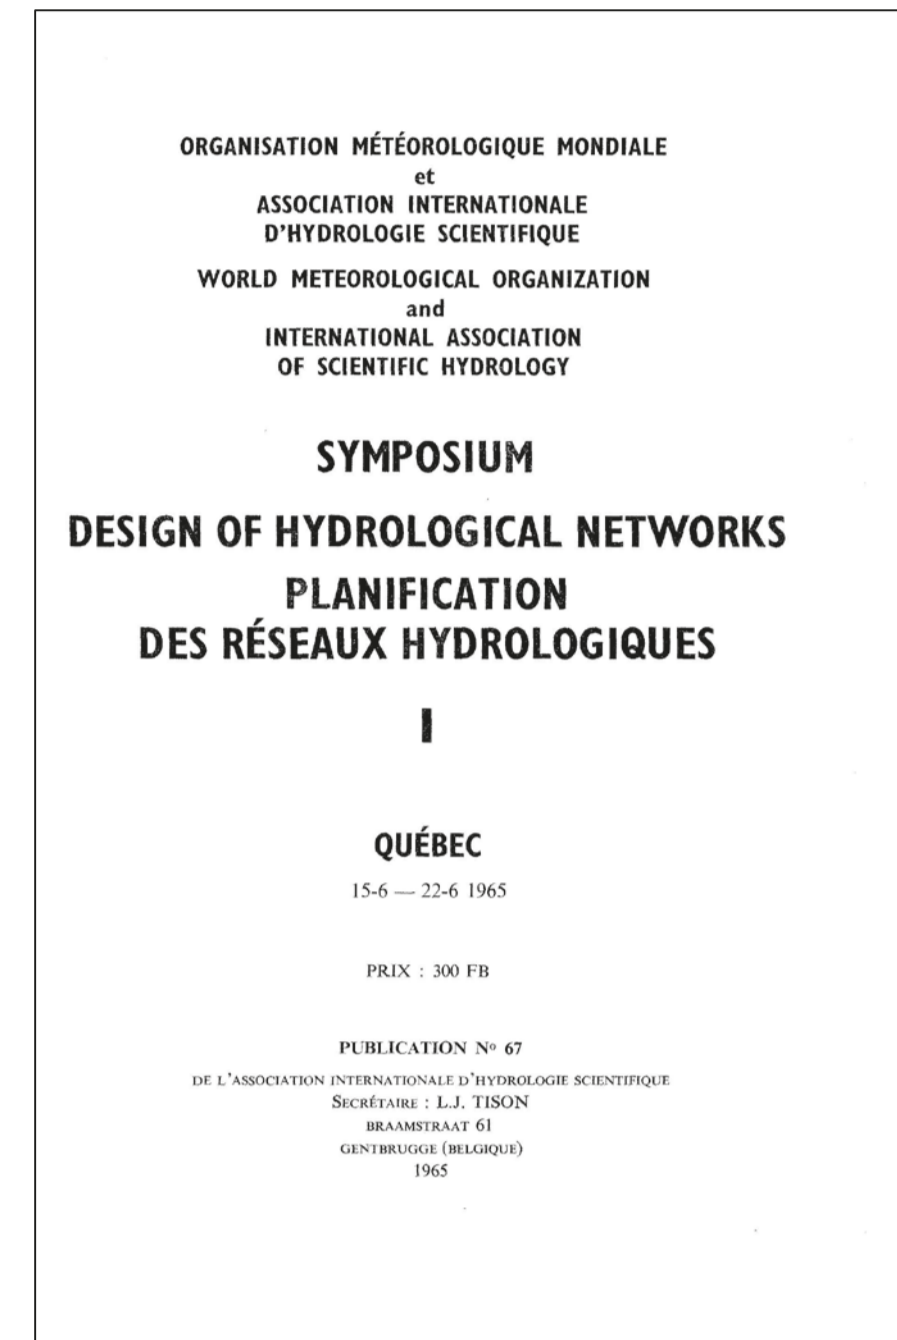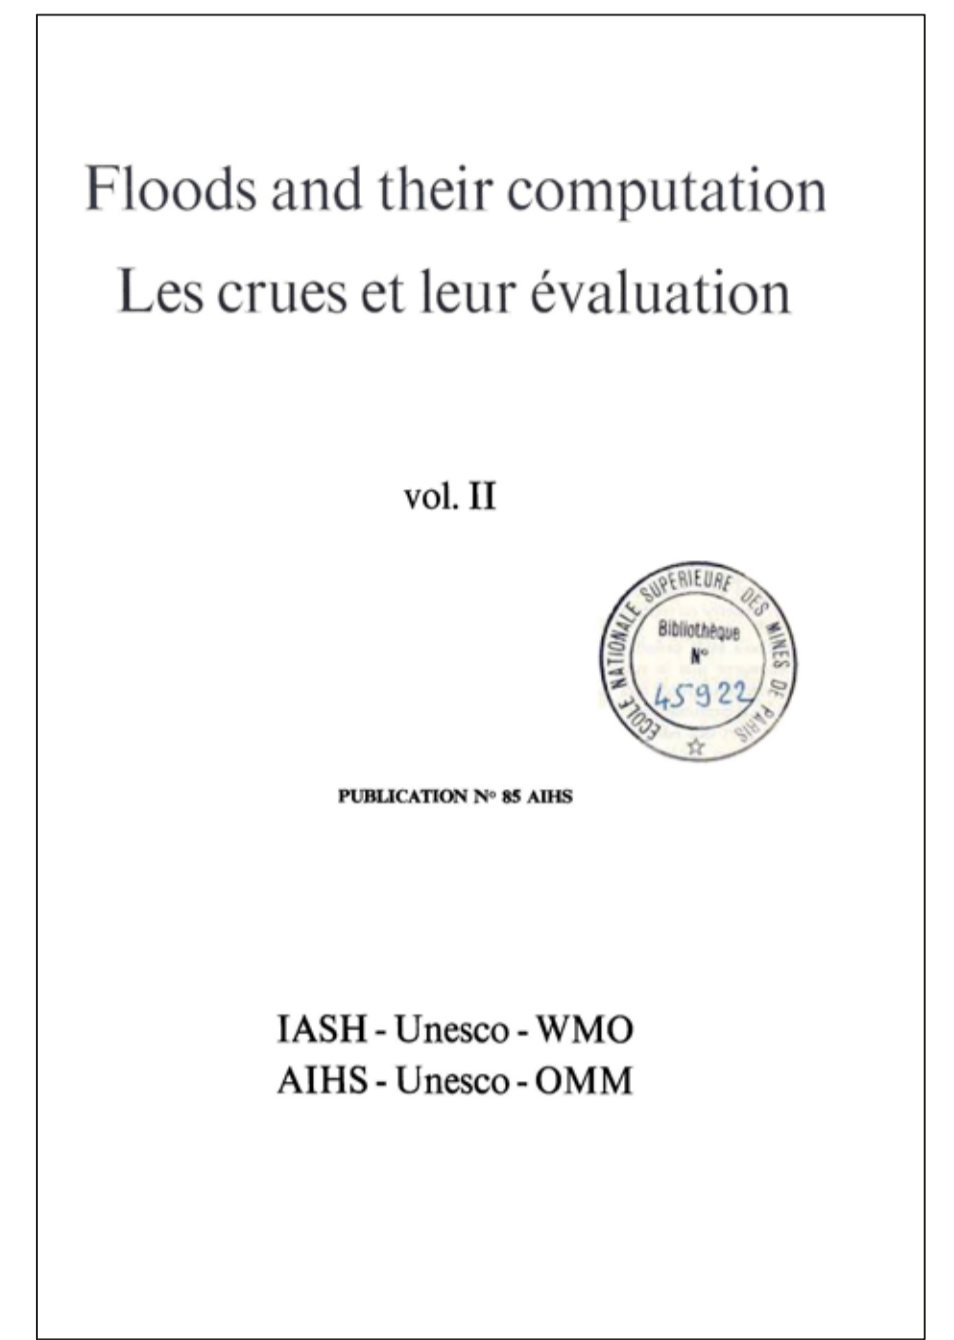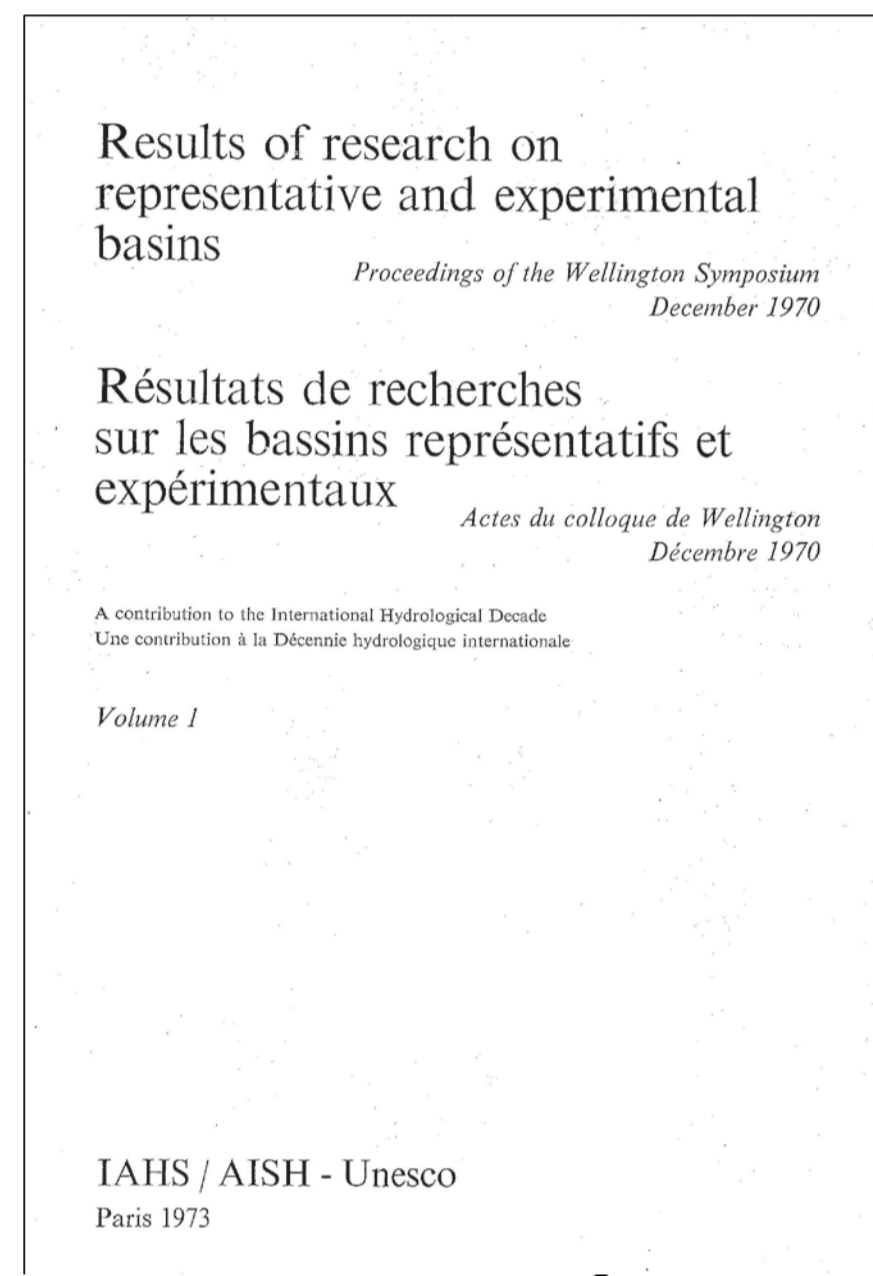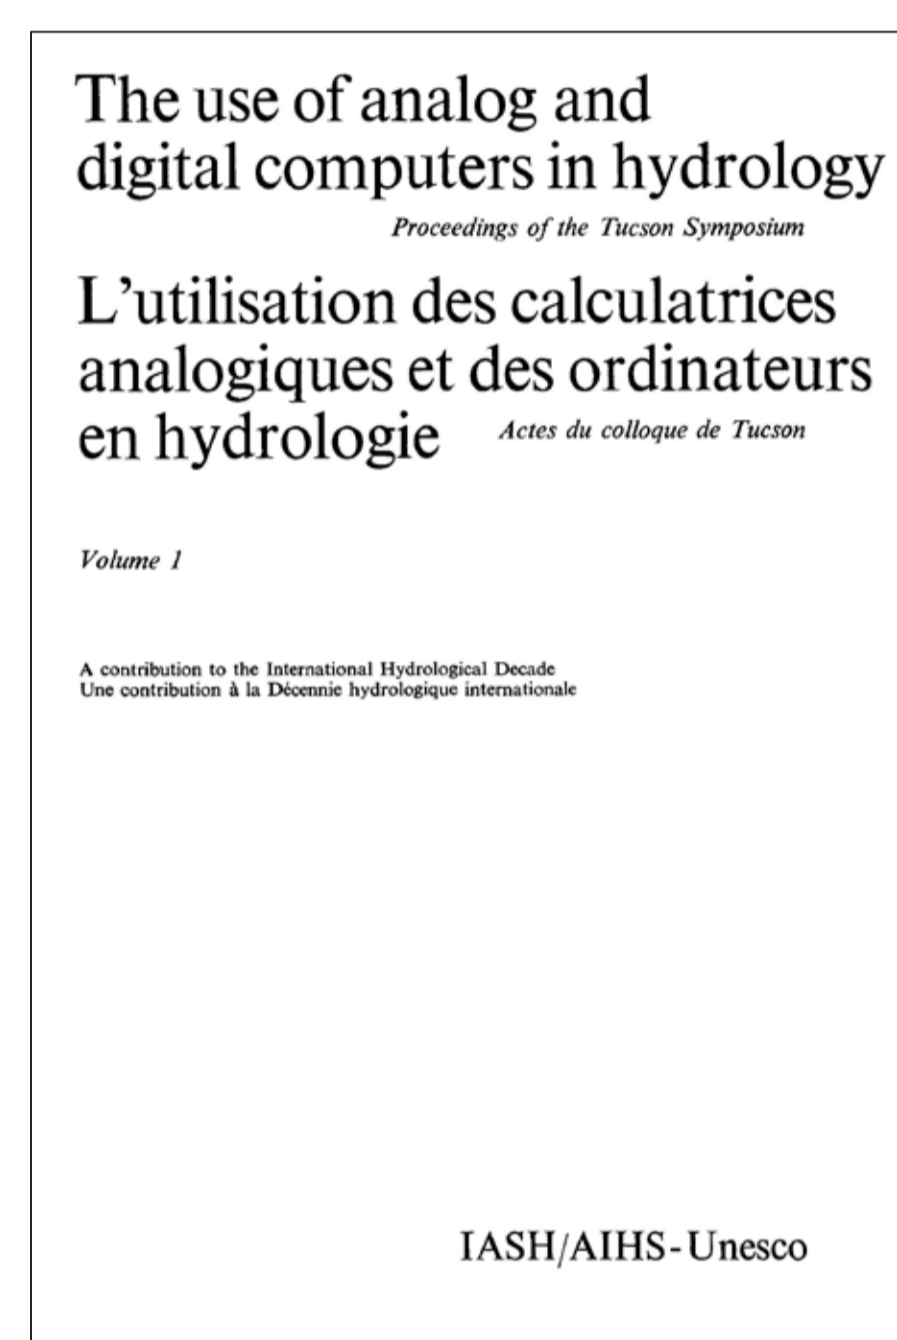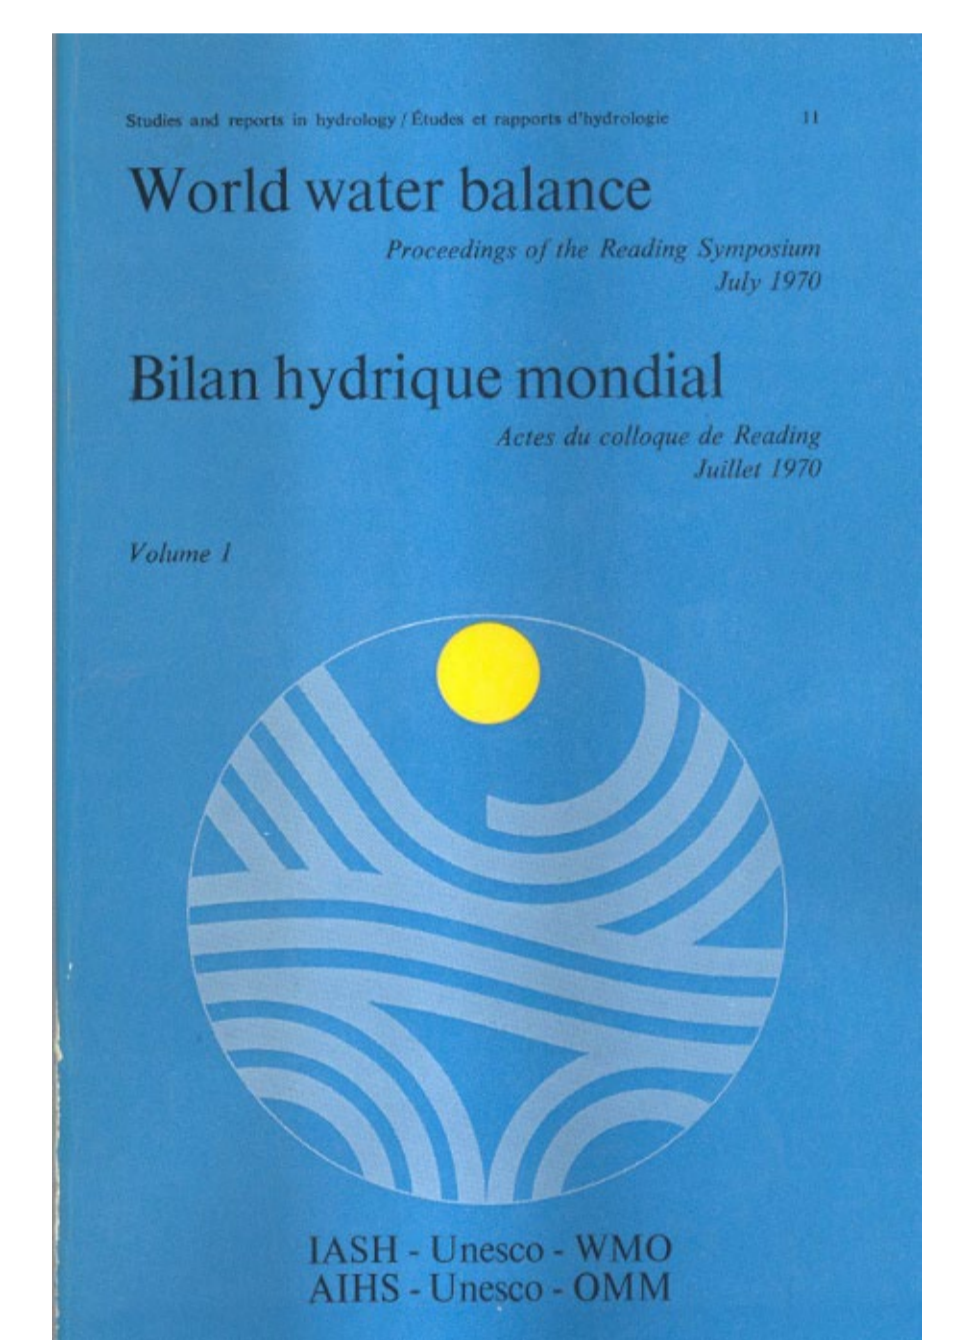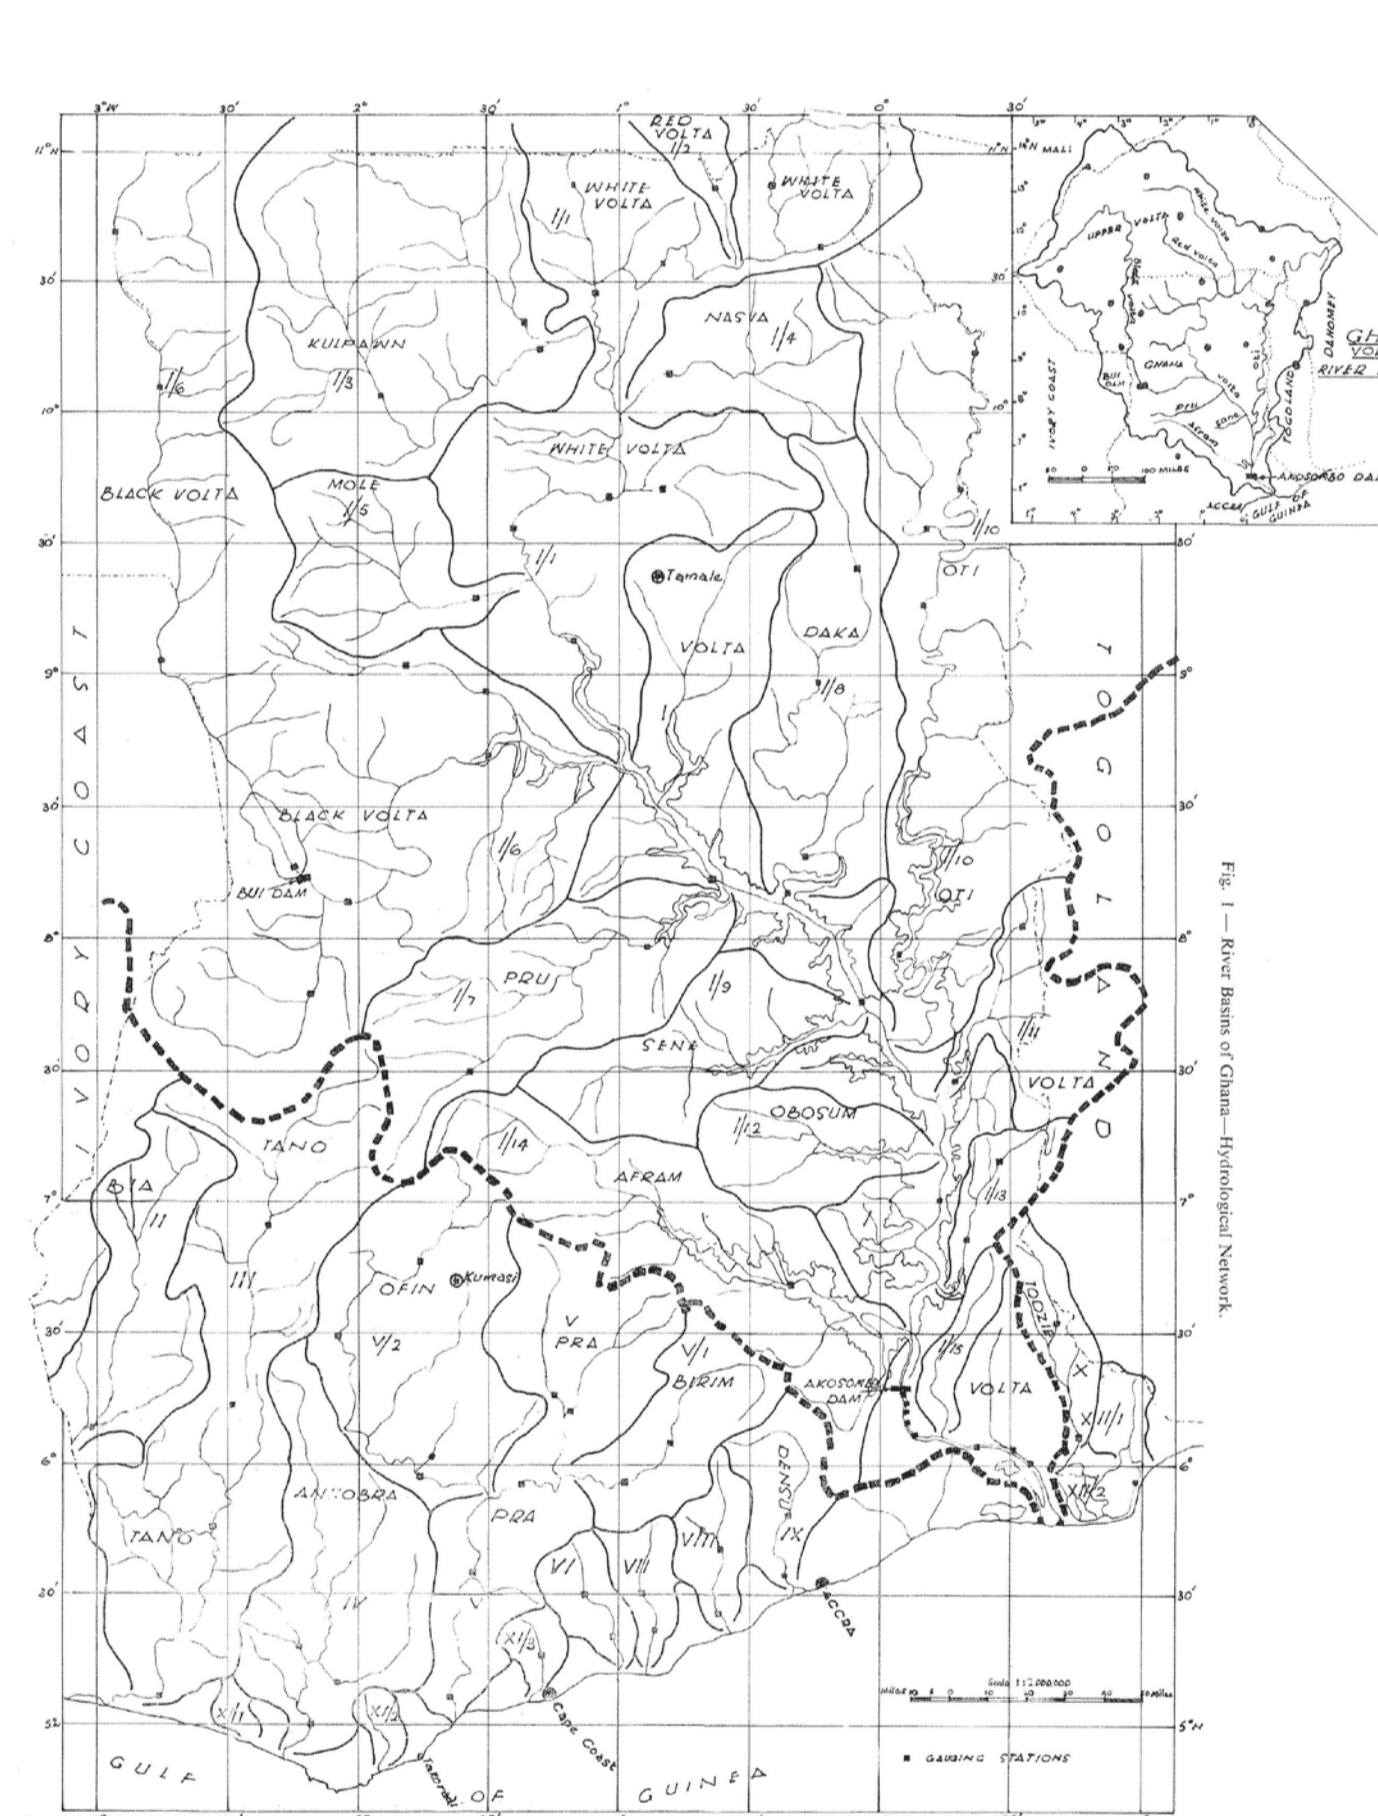

**NATIONAL NETWORKS OF HYDROLOGICAL DATA<sup>(1)</sup>**

W. B. LANGBEIN

**A GENERAL STATEMENT**

The collection of basic data is an attribute of intelligent sovereignty; a wise sovereign seeks to know the value as well as the extent of his domain. Basic data should, therefore, rank high in the national goals of the new countries of the world. In attaining this objective, there is the opportunity to profit by what has been learned in the older countries.

A first lesson is that programs of basic data are profitable. The wealth and health of the world community depend on its development of its resources, and experience seems to show that to the extent that basic data reveal what is available, they encourage development, narrow the range of controversy, and reduce uncertainties. Public knowledge of a resource encourages its development and the availability of data promotes development on sound lines.

A second lesson concerns organizational problems which may be a stumbling block to the attainment of an effective basic-data program. Some principles that understore successful national basic-data programs are these:

The collection of basic water data is more effectively carried out in organizations that have no responsibilities in water development. To combine basic-data collection with construction functions usually leads to one or more of the following difficulties:

Neglect to publish basic data, and their eventual loss; neglect to collect data during critical times, as during floods when personnel may be shifted to other pressing work; uncertainty whether the records are biased in favor of policies or administrative objectives of the agency; and most important, record collection usually is biased in favor of the main functions of a construction agency. For example, an organization concerned mainly with hydroelectric power tends to give little attention to collection of data needed for design of highway bridges and culverts.

With reason, largeness of organization leads to better quality of work. The larger the organization, the greater the range of skills that can be employed, and the greater the flexibility in concentrating on critical short-term problems, such as floods, and most important, the greater the ability to take advantage of the economies of scale. For example, a large organization is better equipped to move toward automation, which small organizations could not afford. Because of the fact that hydrologic data range within a broad field bounded only by the purely meteorological, the purely geological, and the purely ecological, centralization of all hydrological data programs is not feasible, thus coordination is a necessity.

A third lesson to be learned from world experience brings us to the subject of this symposium. Maximum information can be obtained for the available investment of time and money if the network is efficiently designed, just efficiently operated. Several papers on network design and operation are to be heard during this symposium.

Network—a definition. A network is an organized system for the collection of information of a specific kind. Its component parts must be related to one another; that is, each station, point, or region of observation must fill one or more definite niches in either space or time.

The term "network" is most easily conceived as applied to stations. Thus, when one speaks of a "stream-gauging network" a picture springs to mind of a map with pins designating evenly distributed stations. The choice of spacing is assumed to be

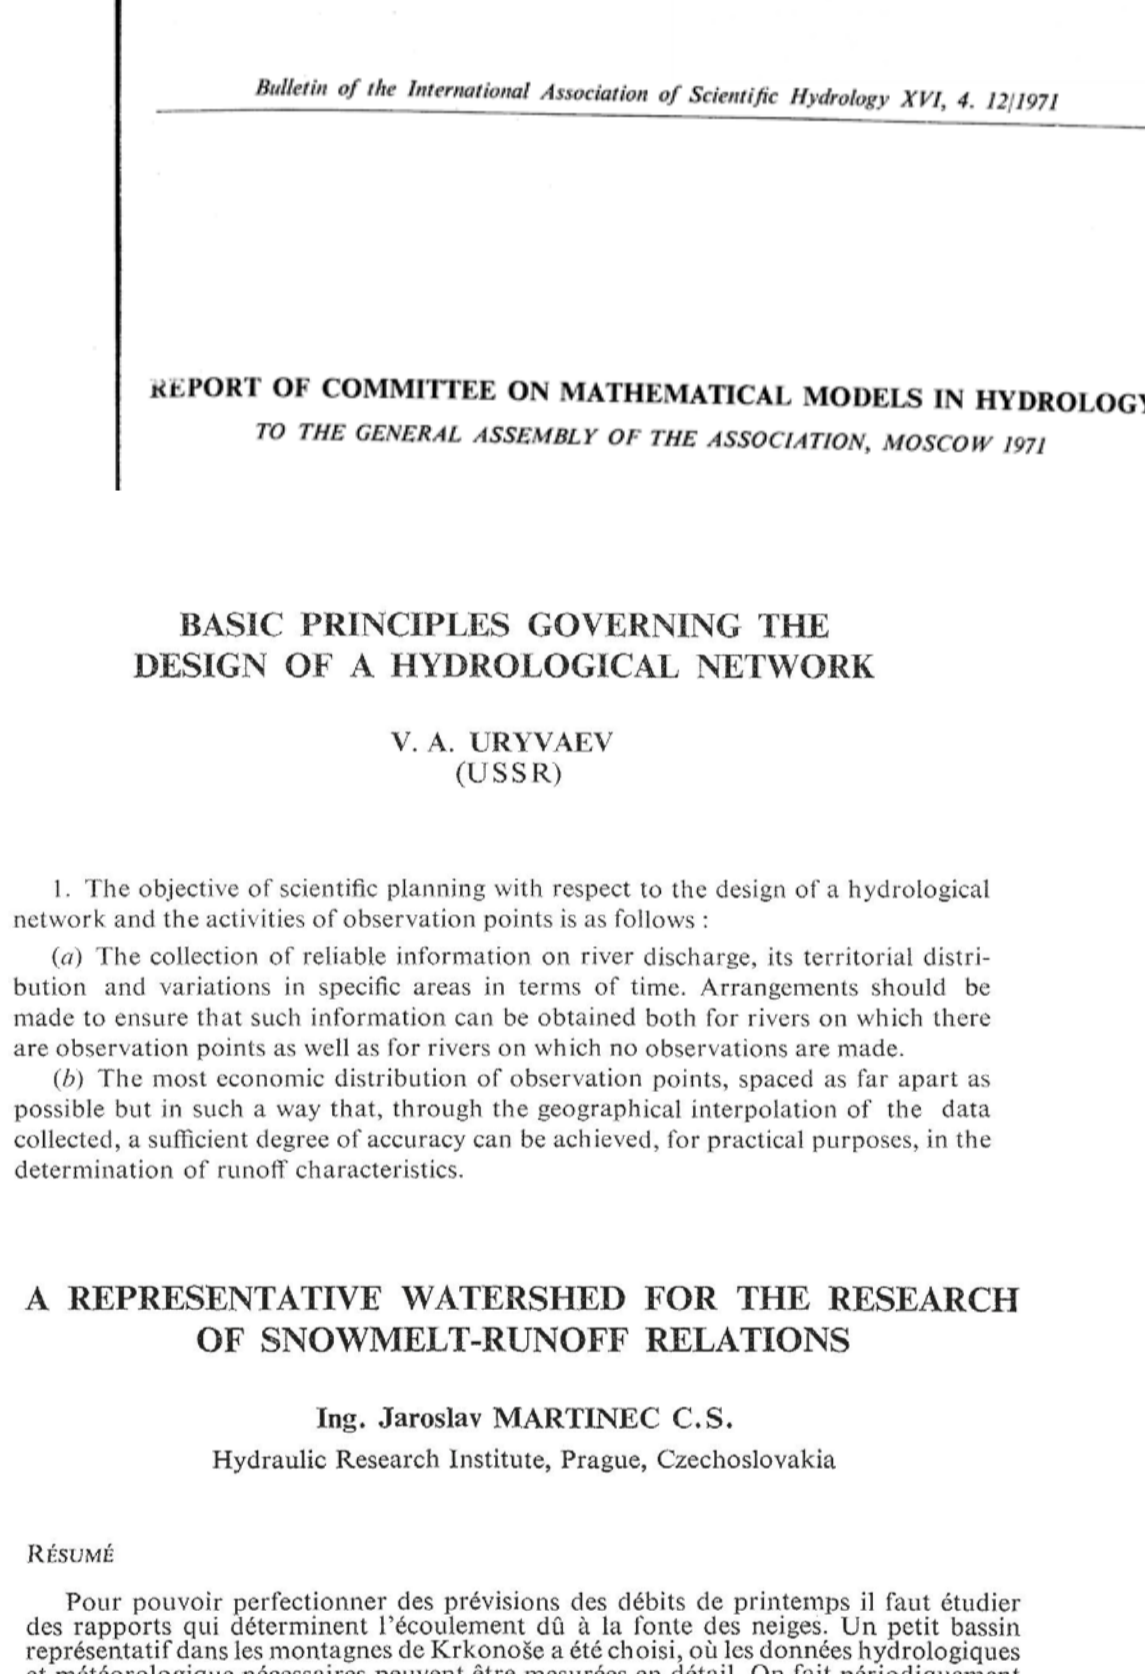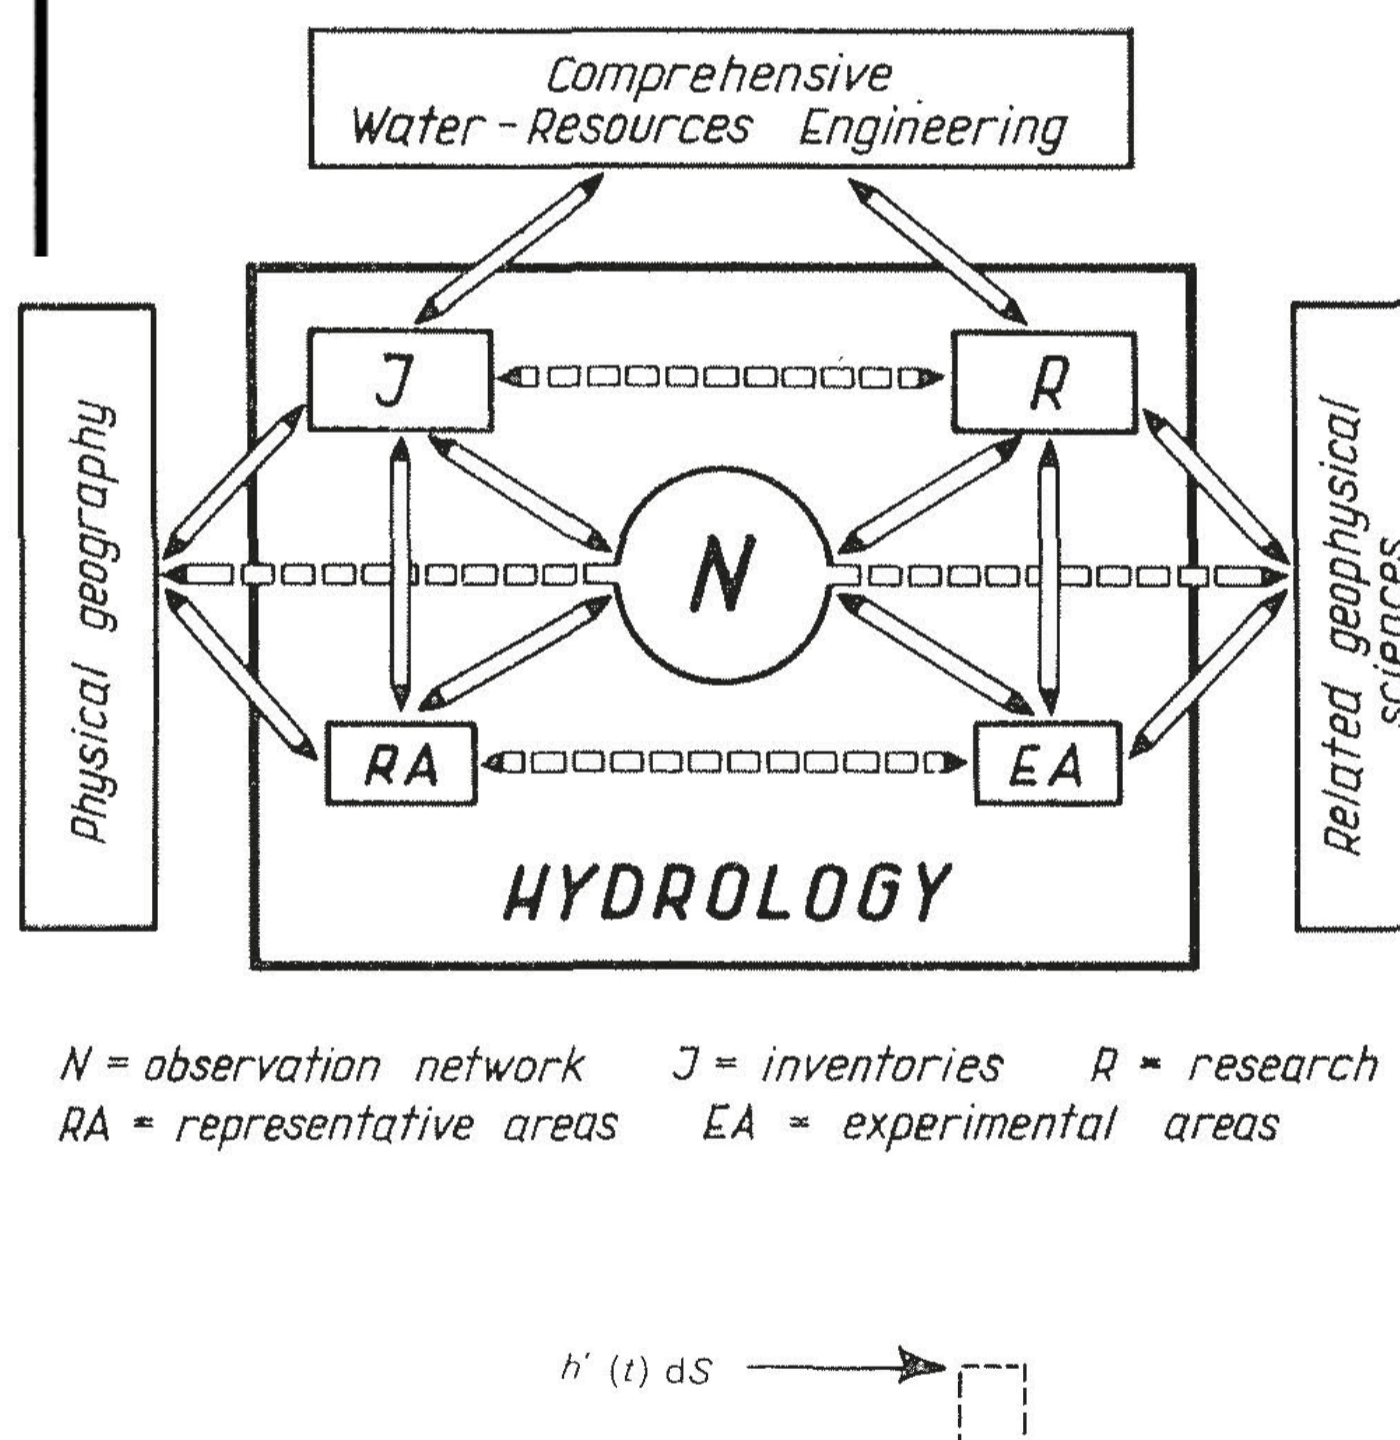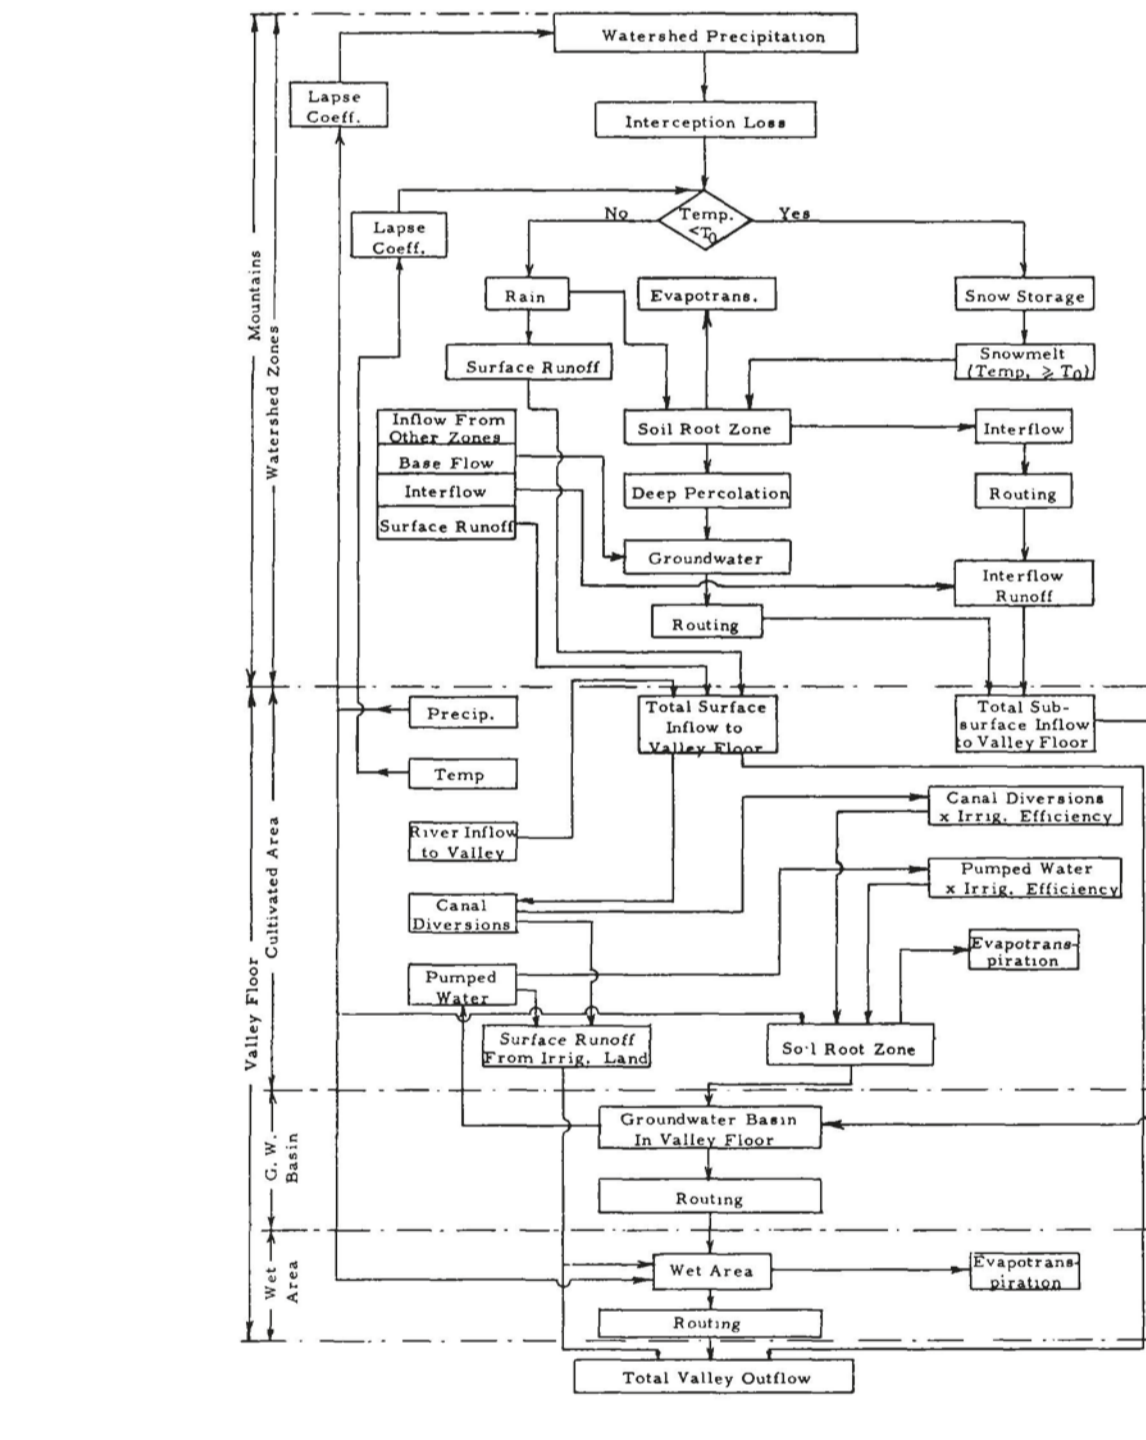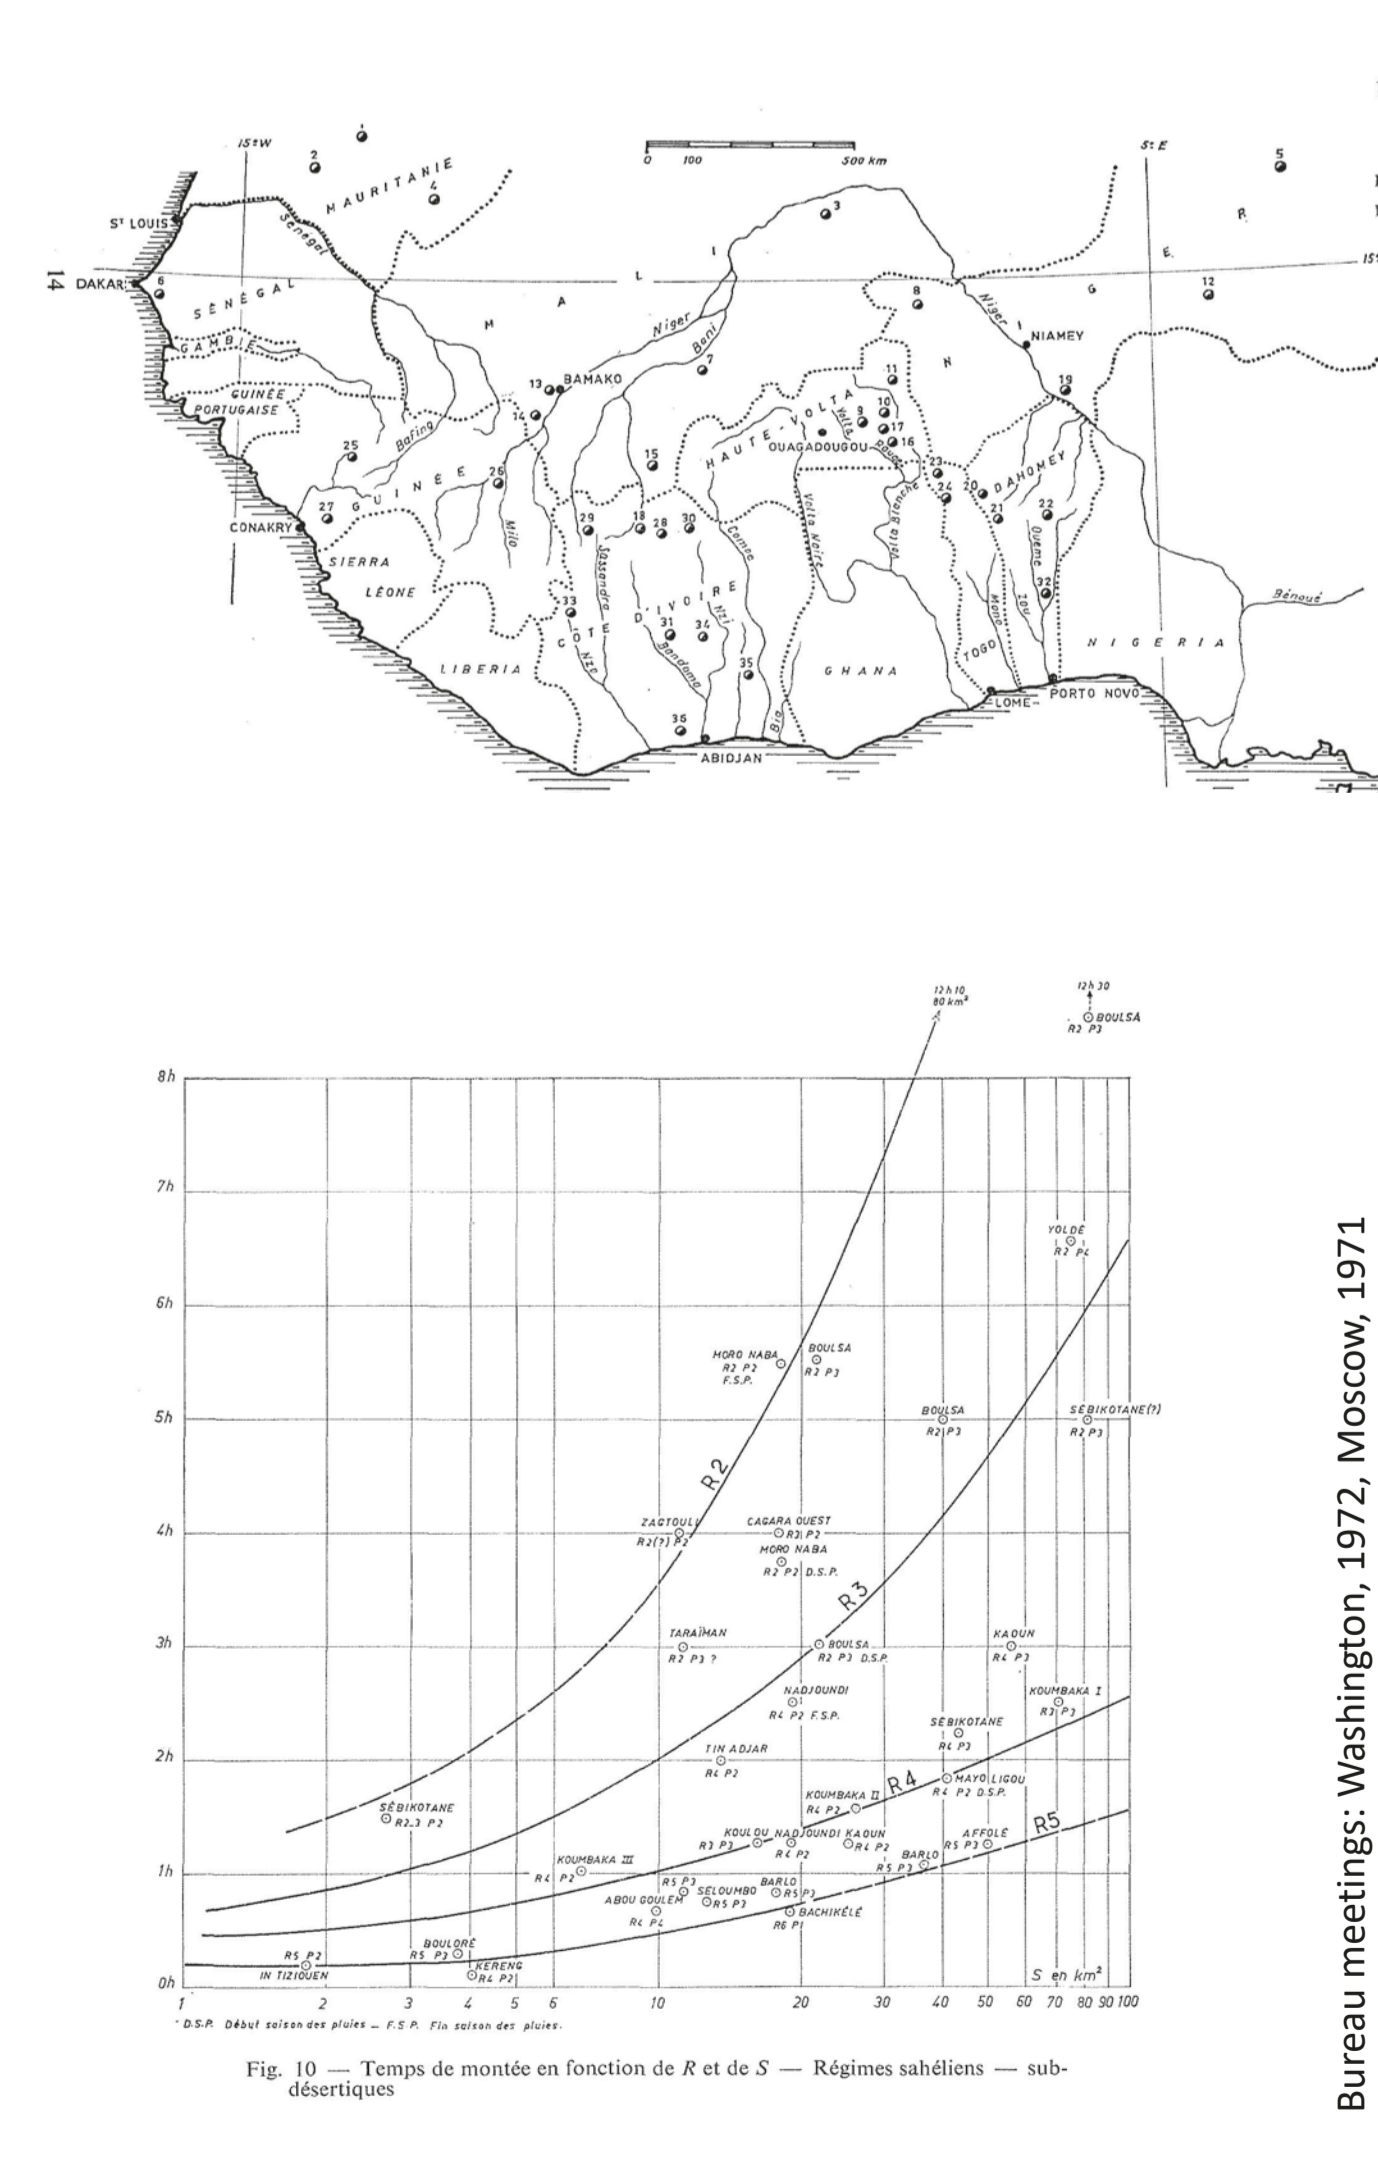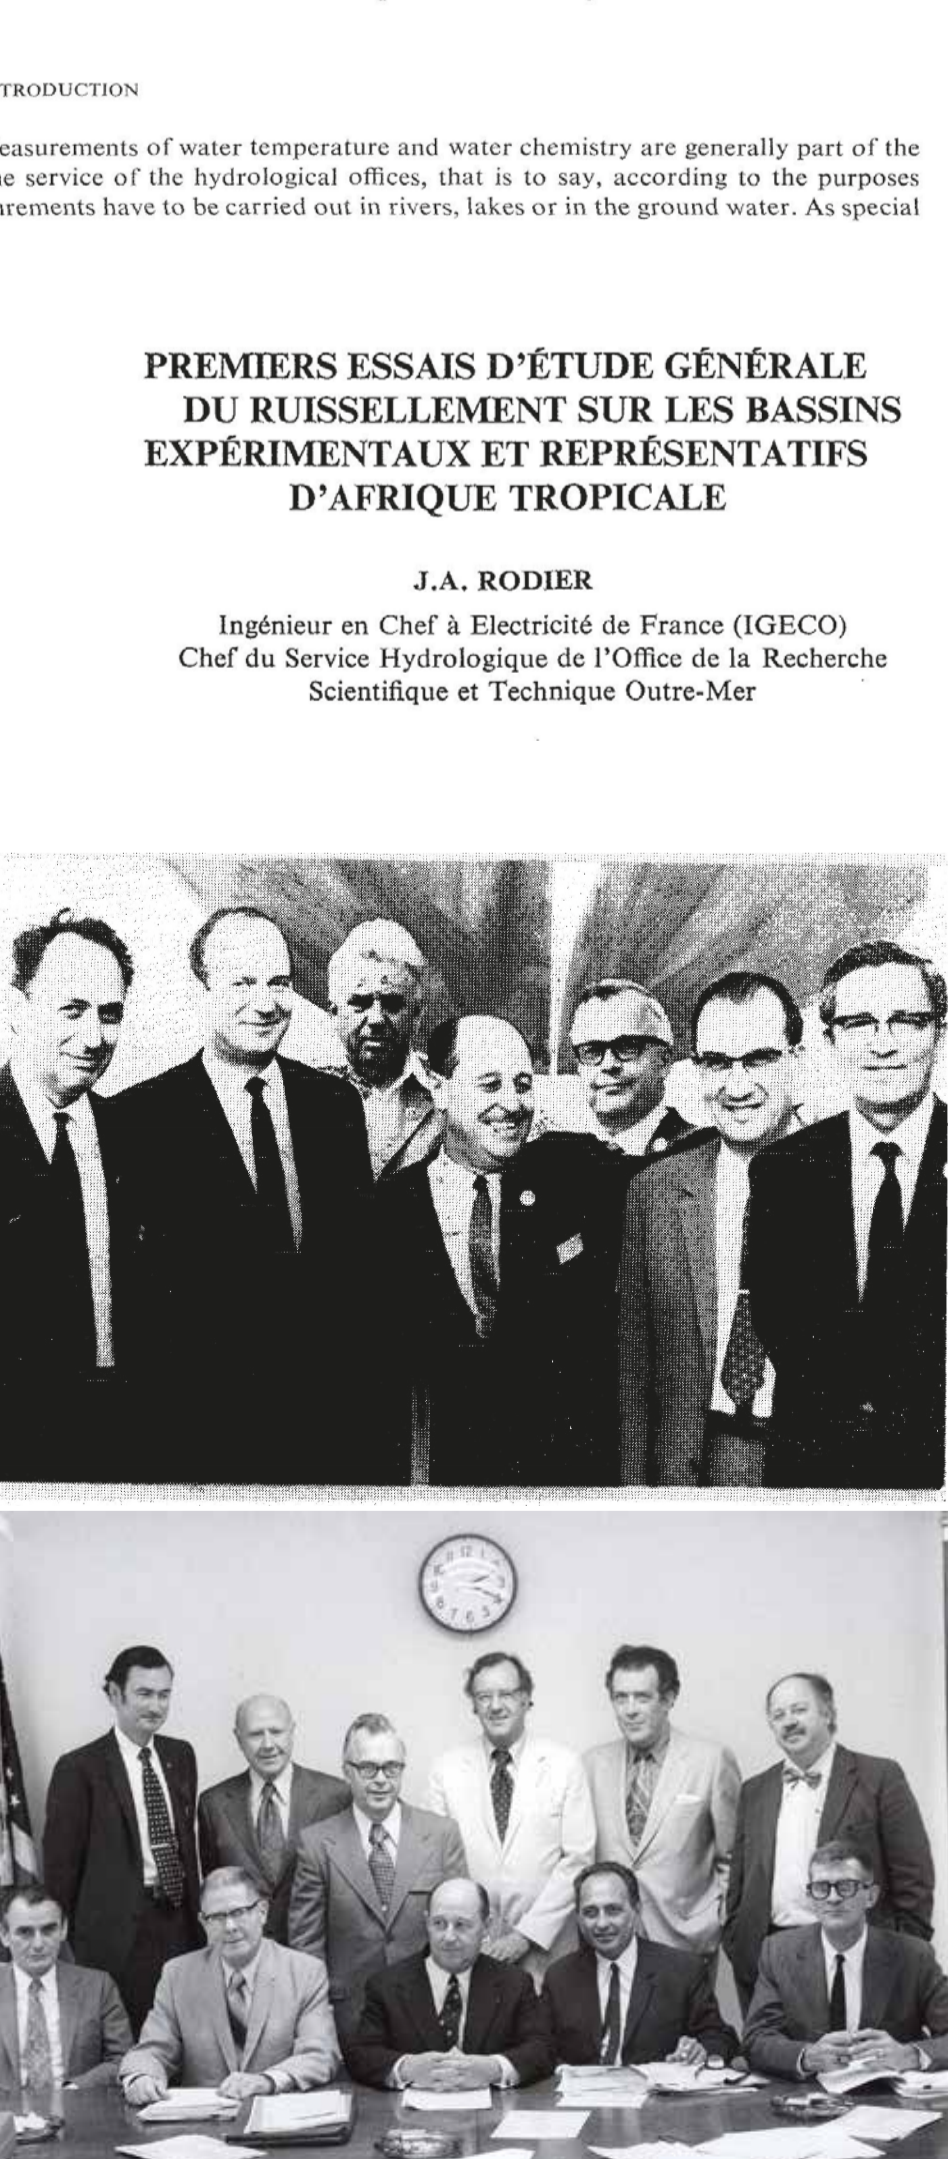

**MESURE DE L'ÉROSION**

**PRINCIPES DE BASE ET INCIDENCE DE L'INSTRUMENTATION NOUVELLE SUR L'ÉTABLISSEMENT DES RÉSEAUX DE MESURE**

F. FOURNIER \*

**Premiers essais d'étude générale du ruissellement sur les bassins expérimentaux et représentatifs d'Afrique tropicale**

J. A. RODIER

Ingénieur en Chef à l'École Nationale Supérieure de l'Eau et de l'Électricité (ENSEE), Chef du Service Hydrologique de l'Office de la Recherche Scientifique Outre-Mer

**EXPERIMENTAL WATERSHEDS CONTRIBUTE USEFUL SEDIMENTATION FACTS<sup>(1)</sup>**

R. F. PIEST and H. G. HEINEMANN<sup>(2)</sup>

**ABSTRACT**

Considerable progress has been made in the evaluation of watershed factors that influence soil erosion, sediment transportation, and deposition. But the present-day intensive use of our water and soil resources requires that these basic relationships be more adequately understood and quantified to achieve economical designs for water-utilization structures and facilities.

**INVESTIGATIONS INTO GROUNDWATER BALANCE IN EXPERIMENTAL AREAS**

Dr. K. UBELL

Research Institute for Water Resources, Budapest

**THE RESEARCH WATERSHED "LEERINKBEK" "NETHERLAND"**

Ir. H. J. COLENBRANDER

Service for Water Management, Rijkswaterstaat

**I. INTRODUCTION**

The main objectives of the investigations in the research watershed "Leerinkbeek" are:

- To determine the actual evapo-transpiration ( $E_a$ ) from the waterbalance.
- To calculate the water deficiency by comparing  $E_a$  with the potential evapo-transpiration ( $E_p$ ).
- To study the relationship between rainfall, soil retention capacity and runoff.
- To measure the peak flow and minimum discharge in the various seasons of the year.
- To study the flood routing problem.

The implementation of the programme for the watershed started in 1960-1961.

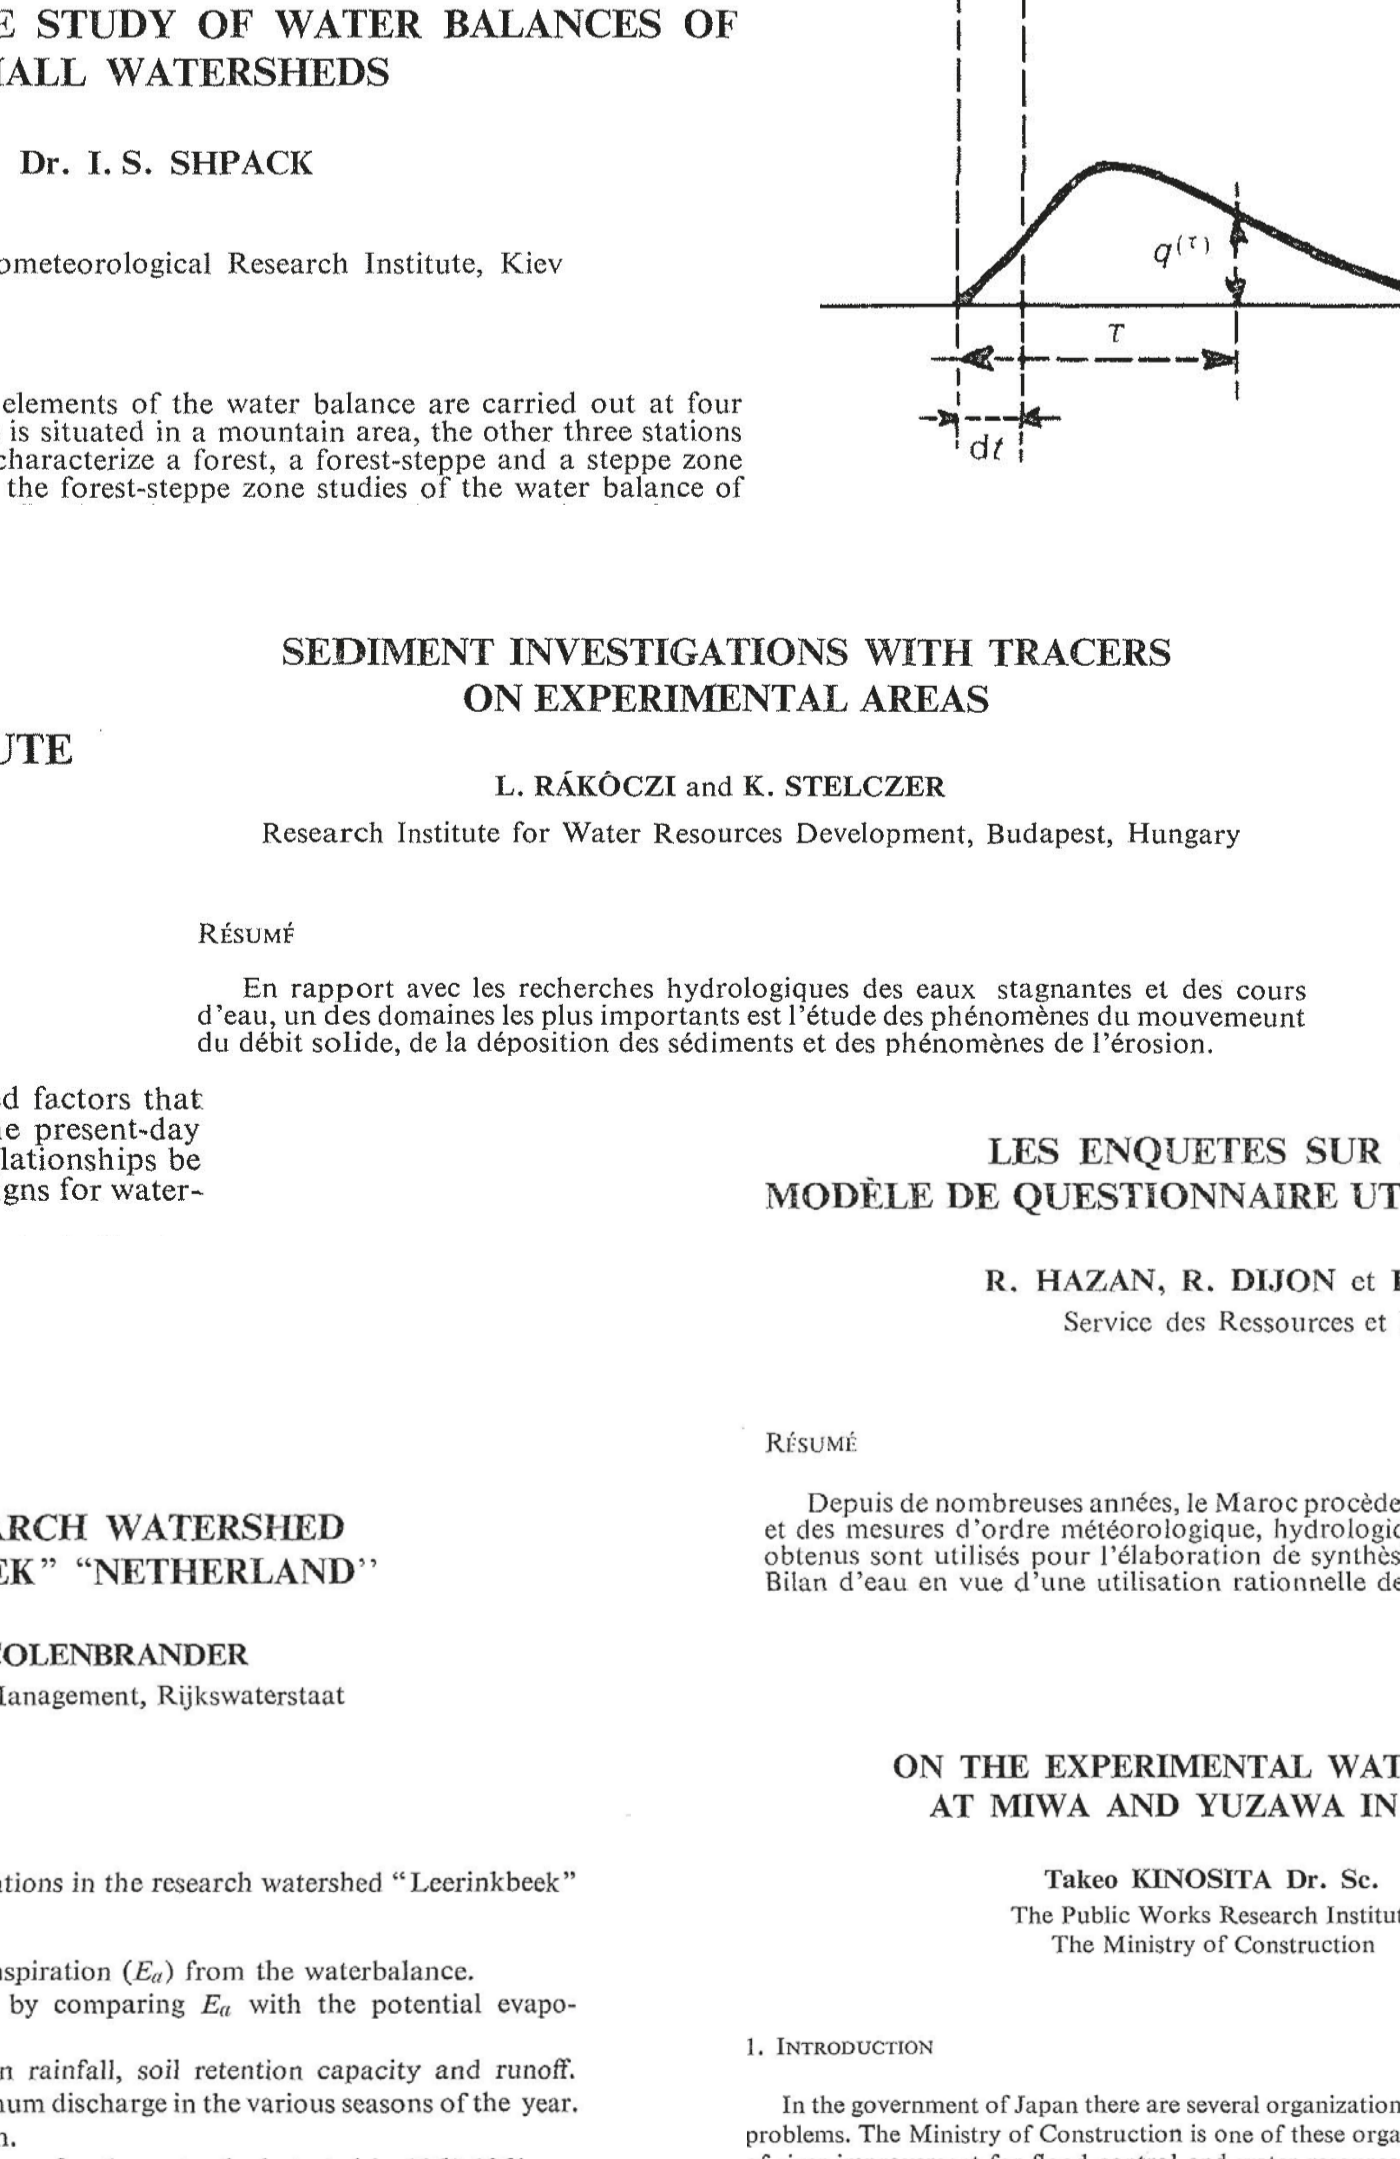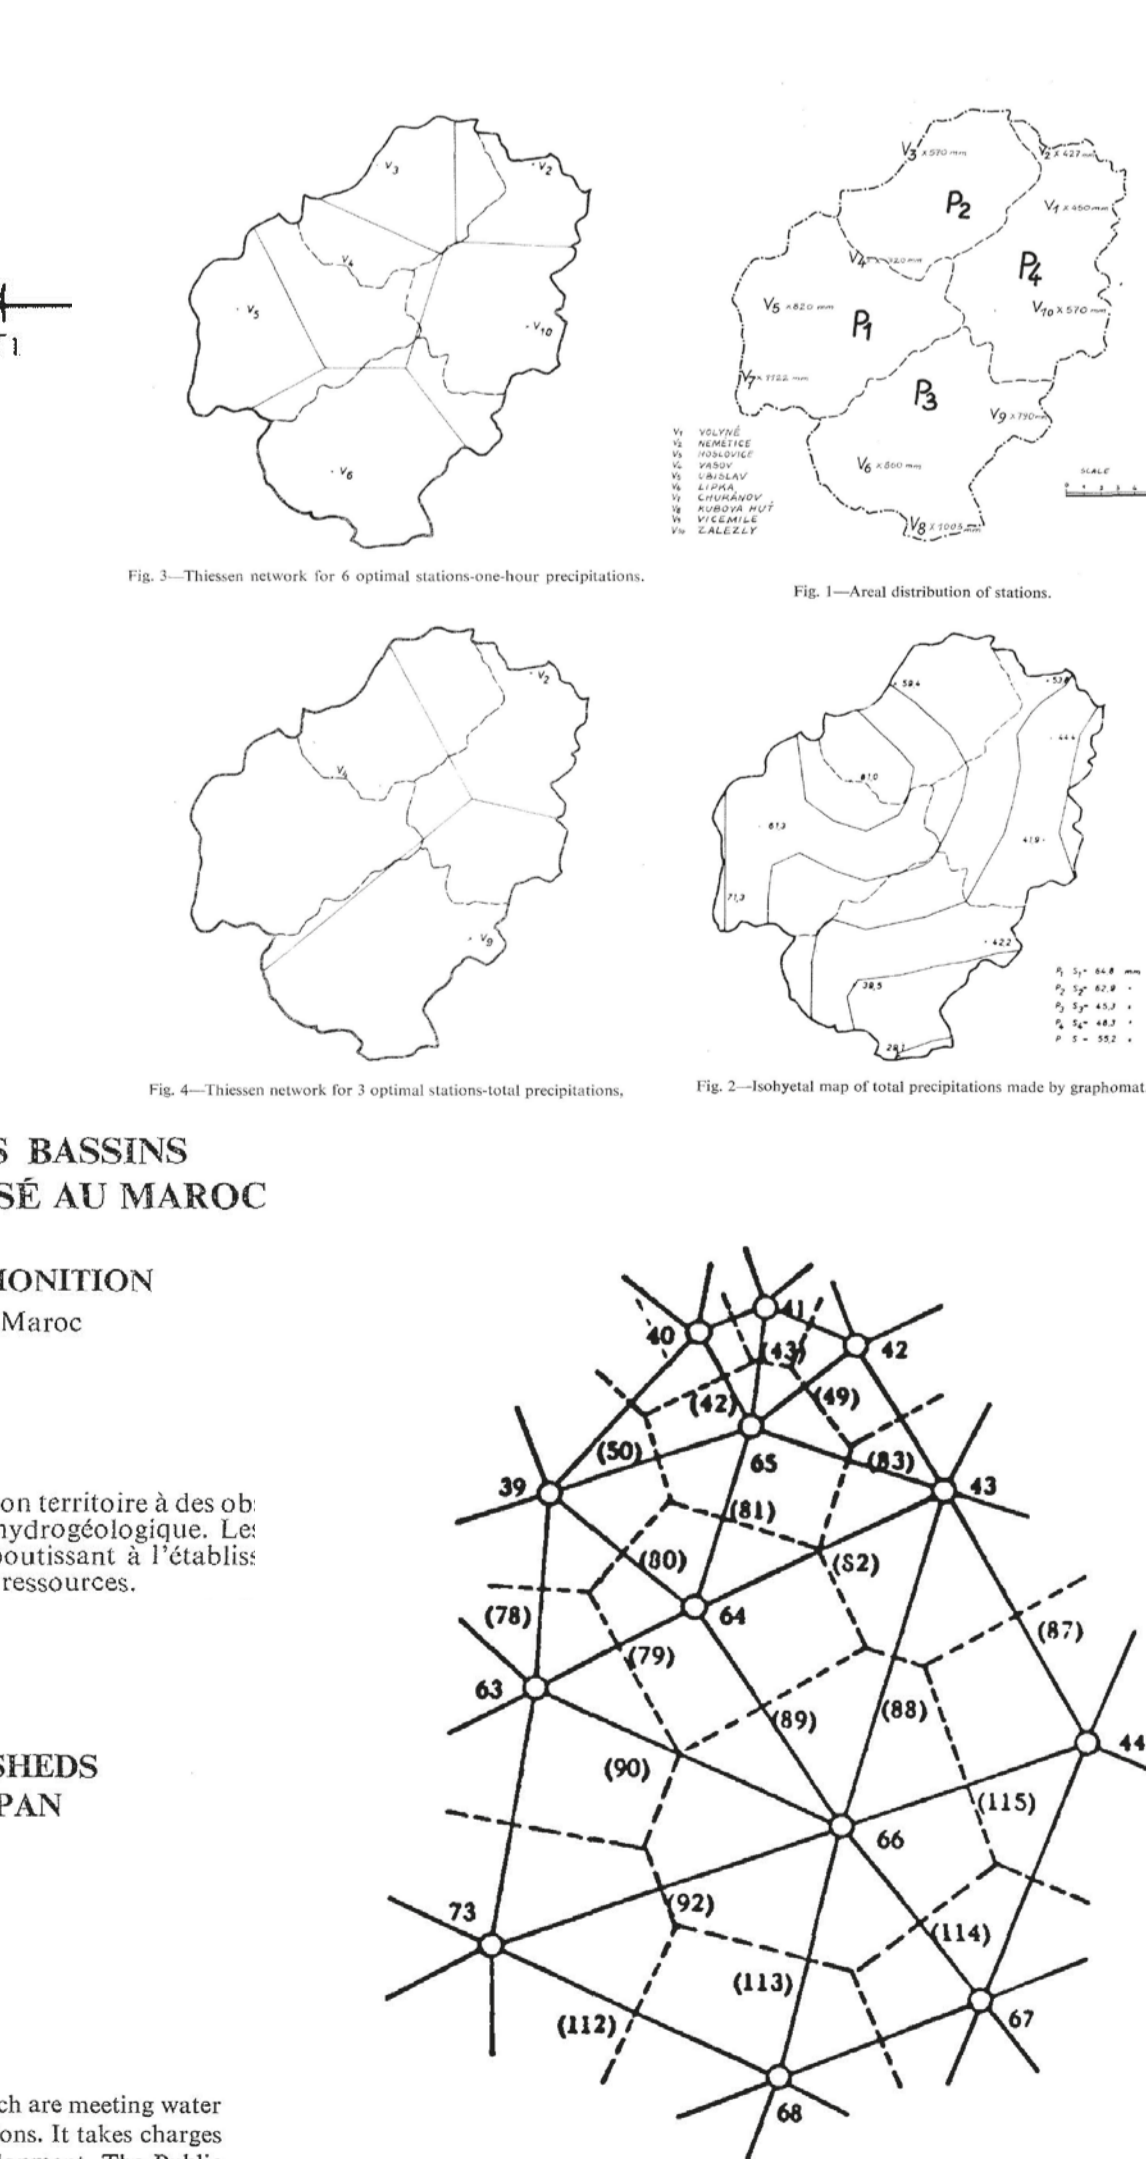

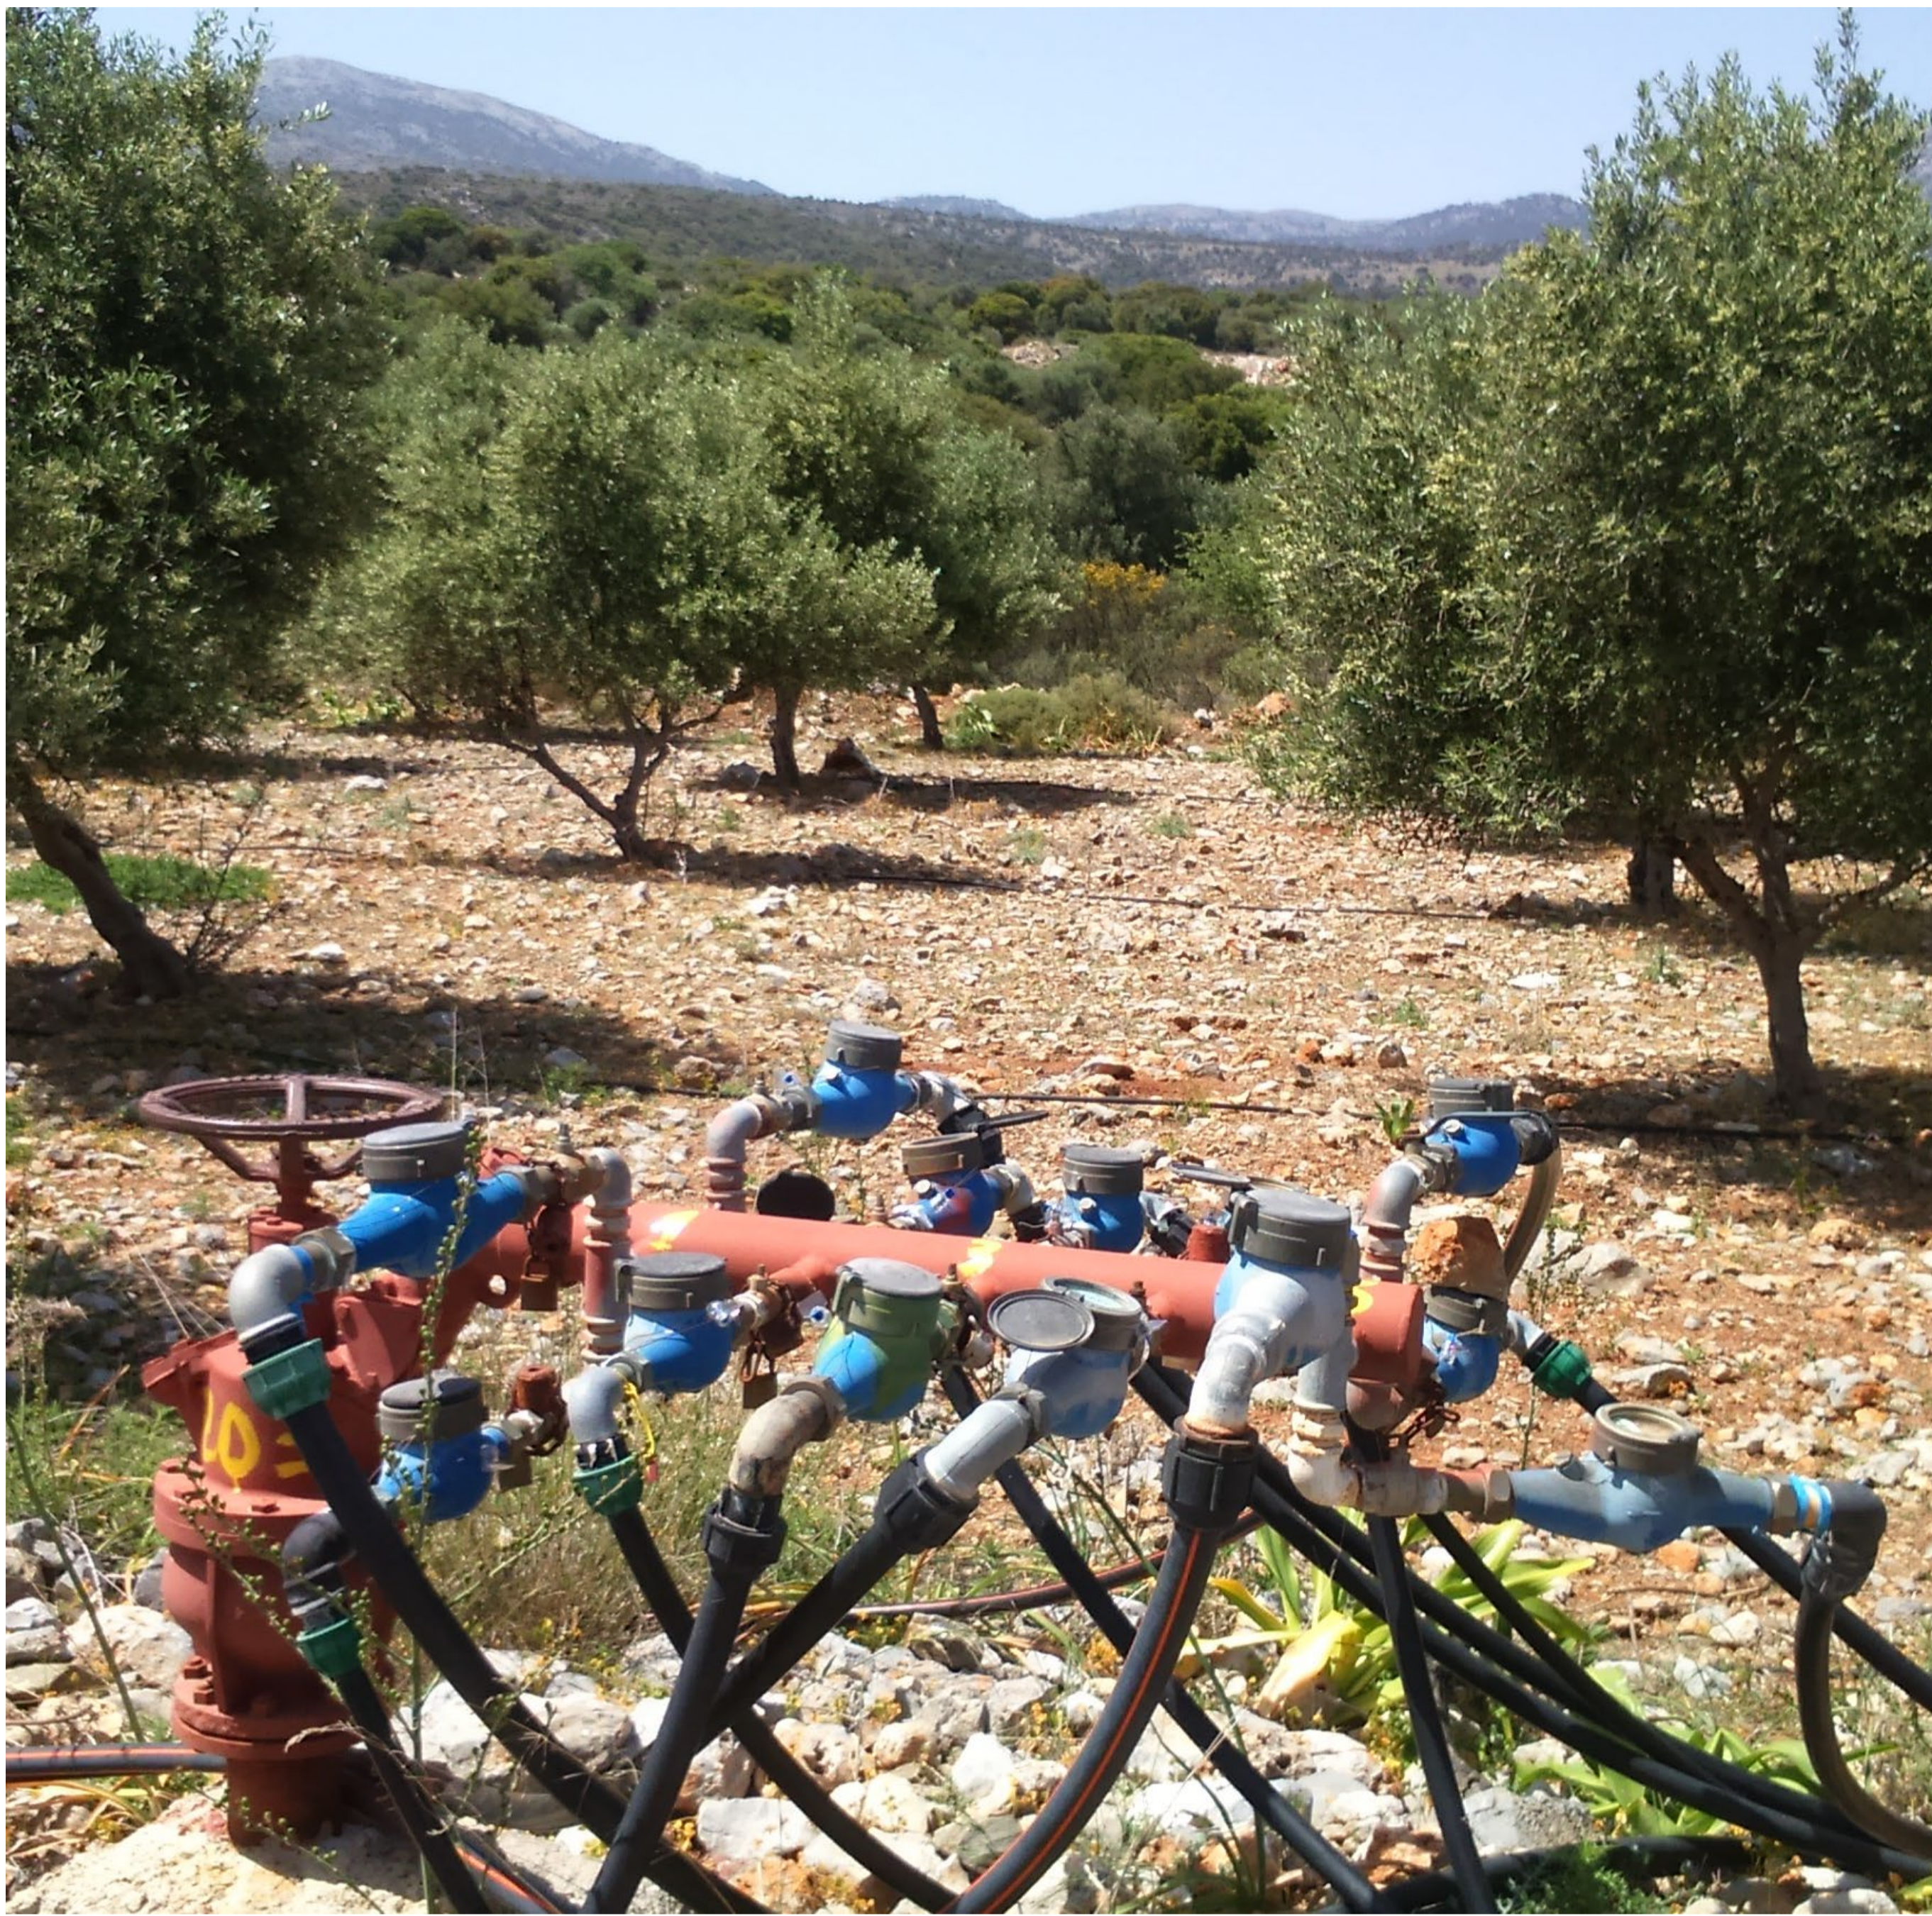

## Words in Titles of publications 1952-1982

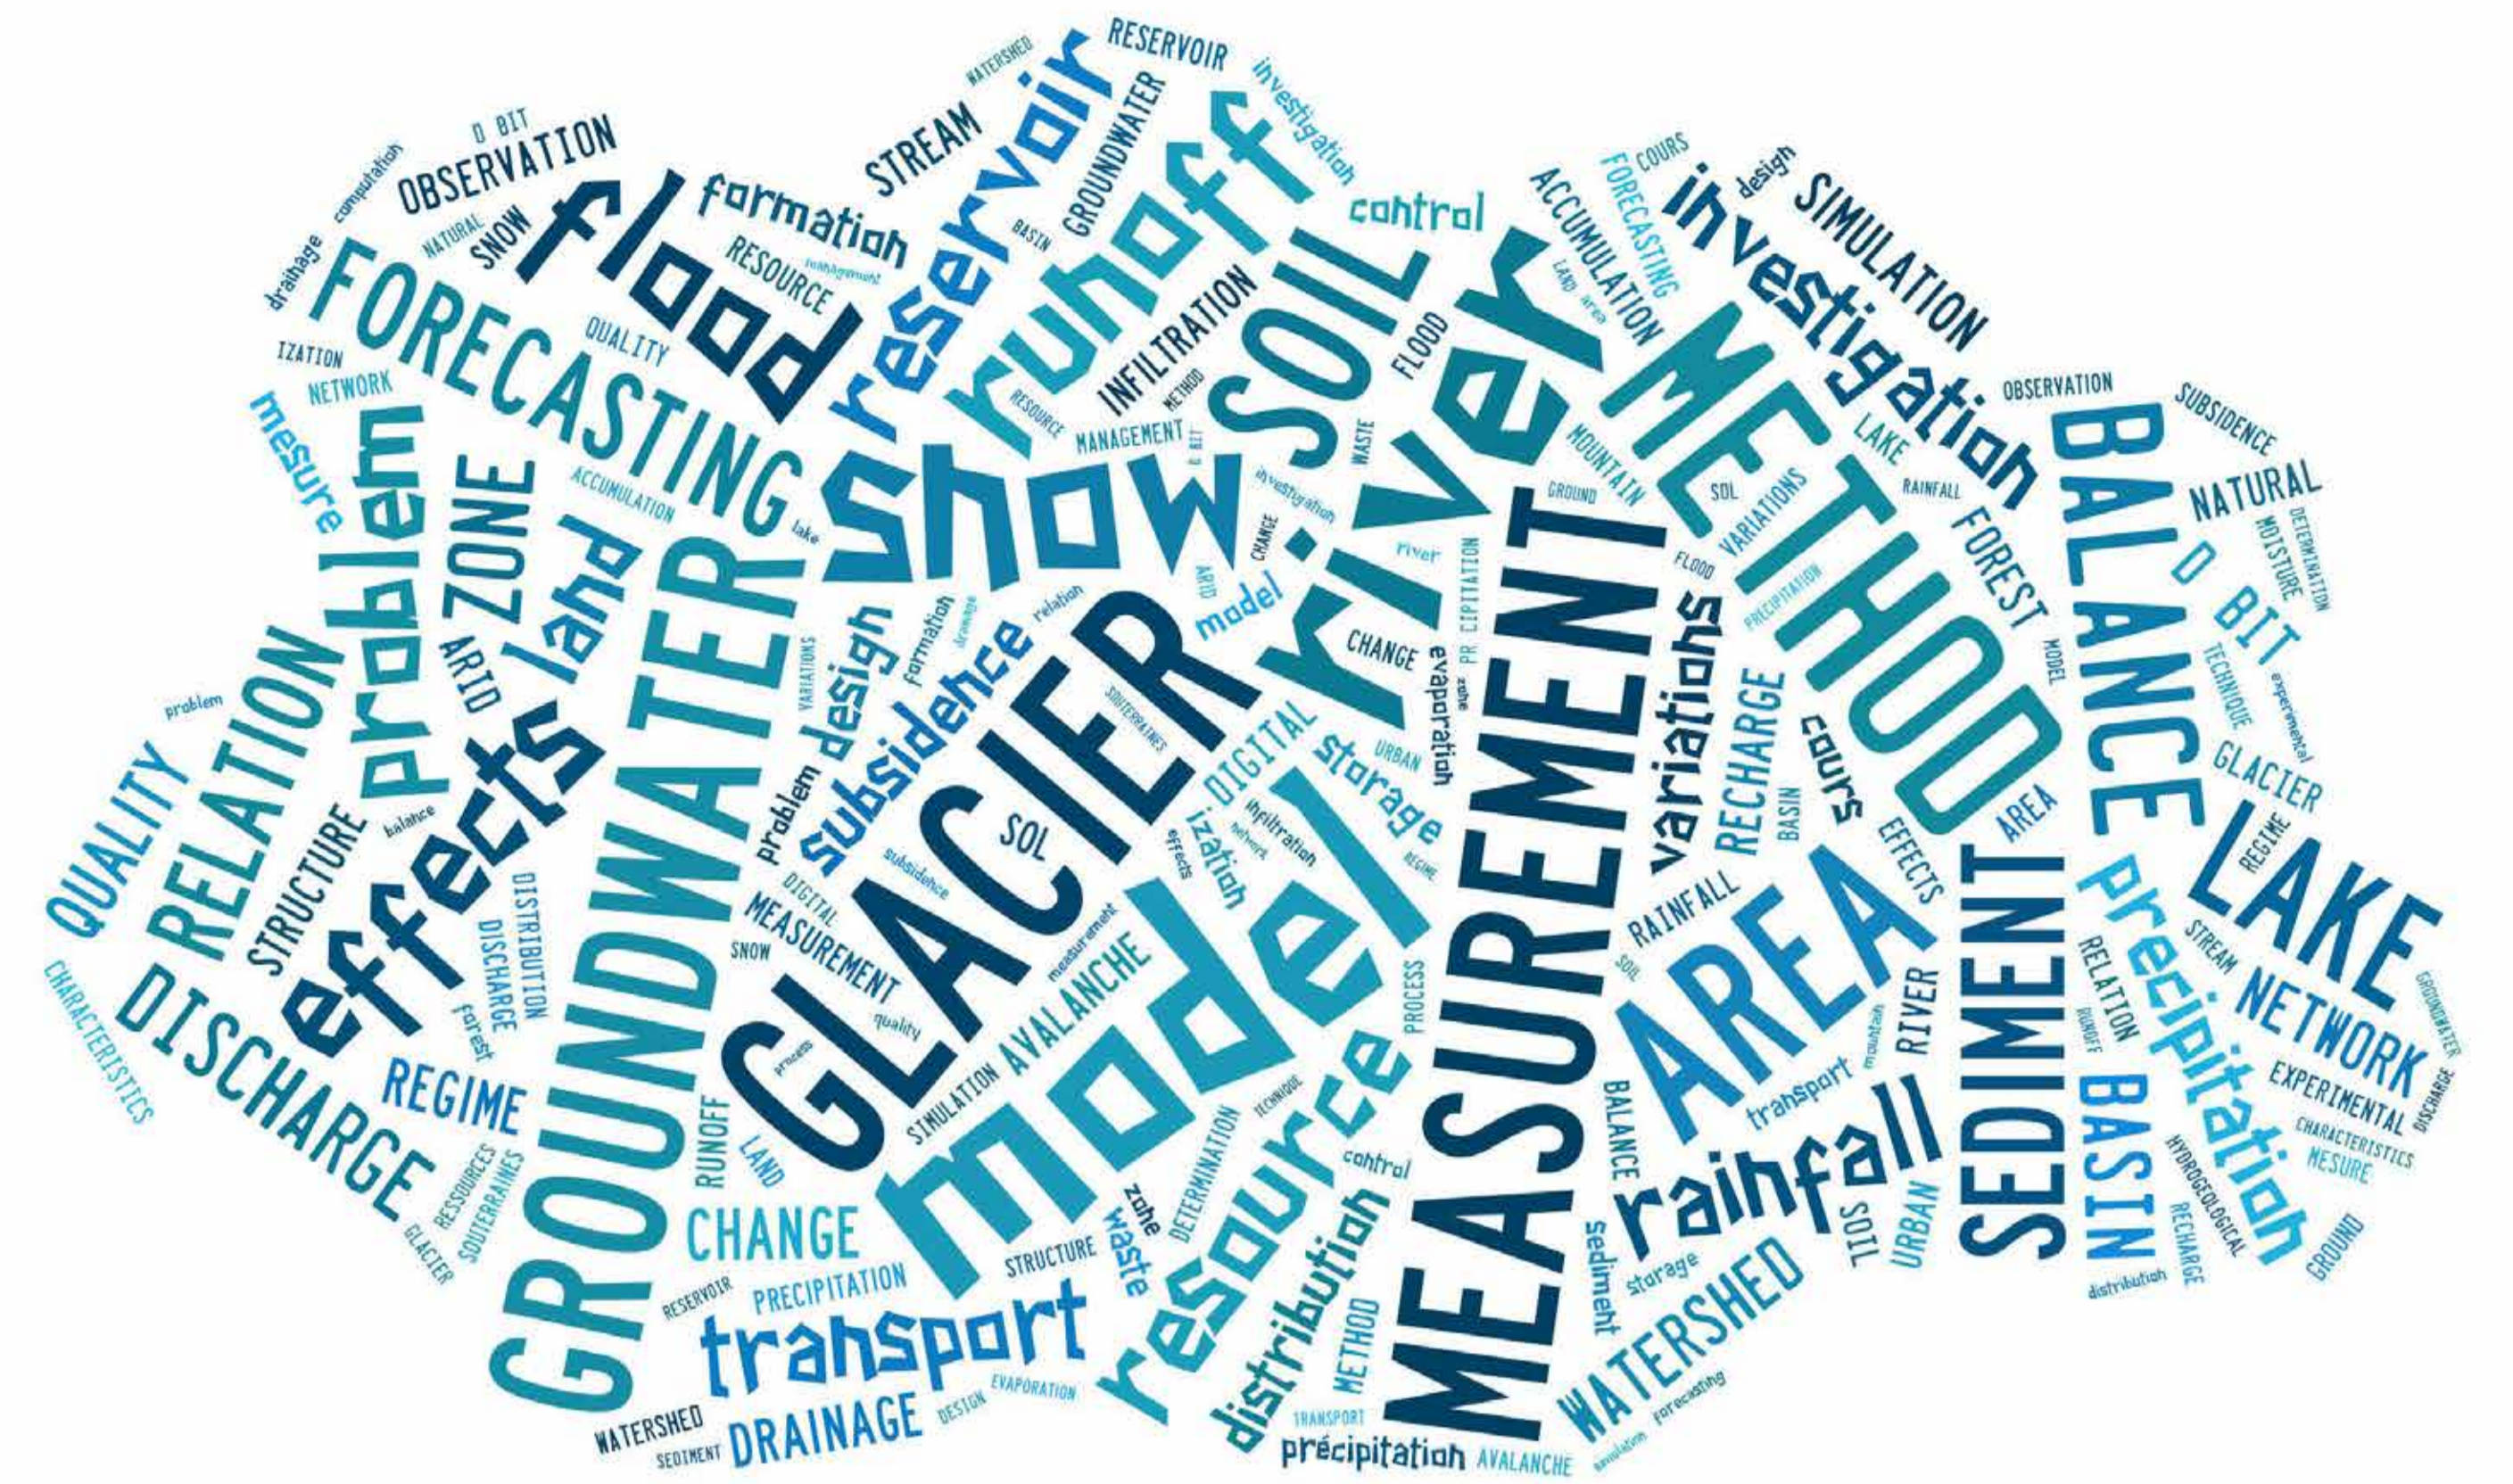

## 1972: Renaming of the Hydrological Sciences Bulletin

## 1975: Creation of the International Hydrological Programme in the frame of UNESCO – IAHS Official Partner

## 1981: Creation of the IAHS-UNESCO-WMO International Hydrology Prize

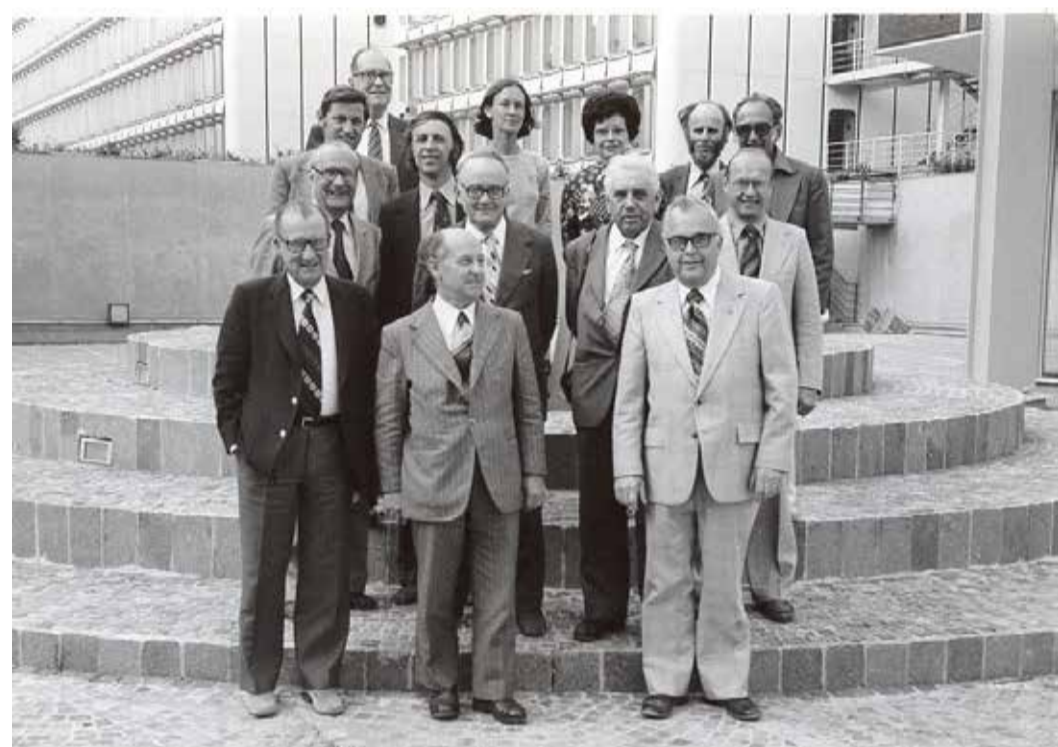

IAHS Bureau, Paris, 1978

### MATHEMATICAL MODELS IN GEOPHYSICS SYMPOSIUM MODELES MATHEMATIQUES EN GEOPHYSIQUE

HYDROLOGICAL FORECASTING SYMPOSIUM  
PREVISIONS HYDROLOGIQUES  
IAHS-AISH Publication No 129  
Published with the financial assistance of UNESCO

### APPLICATION OF MATHEMATICAL MODELS IN HYDROLOGY AND WATER RESOURCES SYSTEMS SYMPOSIUM APPLICATION DES MODELES MATHEMATIQUES A L'HYDROLOGIE ET AUX SYSTEMES DE RESSOURCES EN EAU

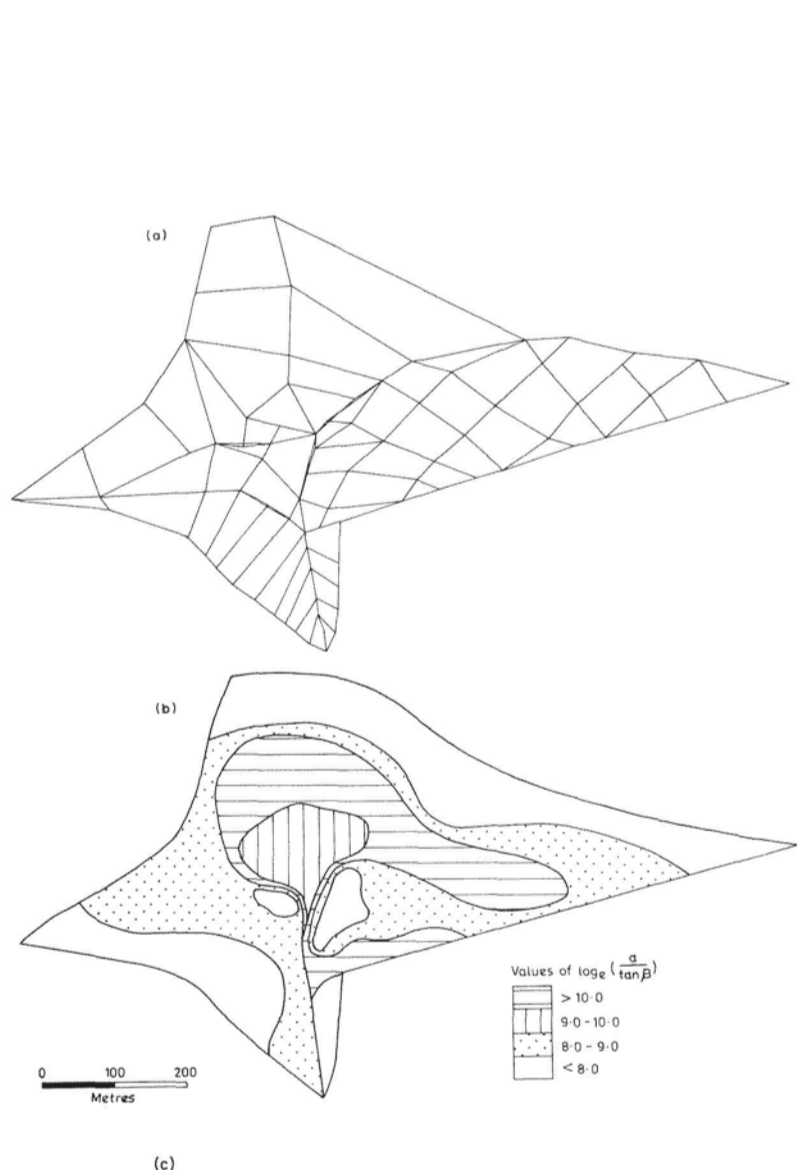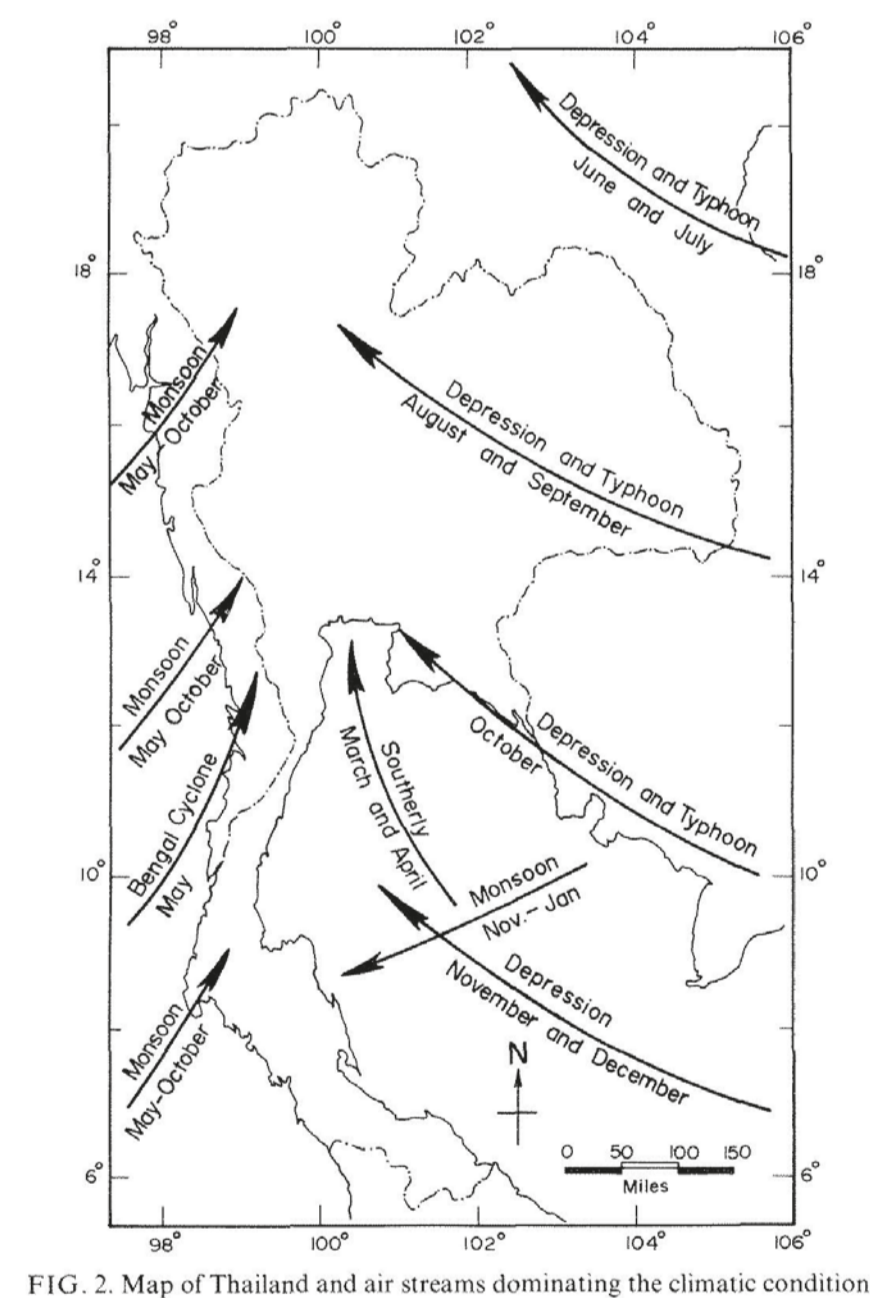

FIG. 2. Map of Thailand and air streams dominating the climatic conditions

### THE INFLUENCE OF MAN ON THE HYDROLOGICAL REGIME WITH SPECIAL REFERENCE TO REPRESENTATIVE AND EXPERIMENTAL BASINS SYMPOSIUM L'INFLUENCE DE L'HOMME SUR LE REGIME HYDROLOGIQUE AVEC REFERENCE PARTICULIERE AUX ETUDES SUR LES BASSINS REPRESENTATIFS ET EXPERIMENTAUX

IAHS-AISH Publication No. 130

IAHS-AISH Publication No. 130

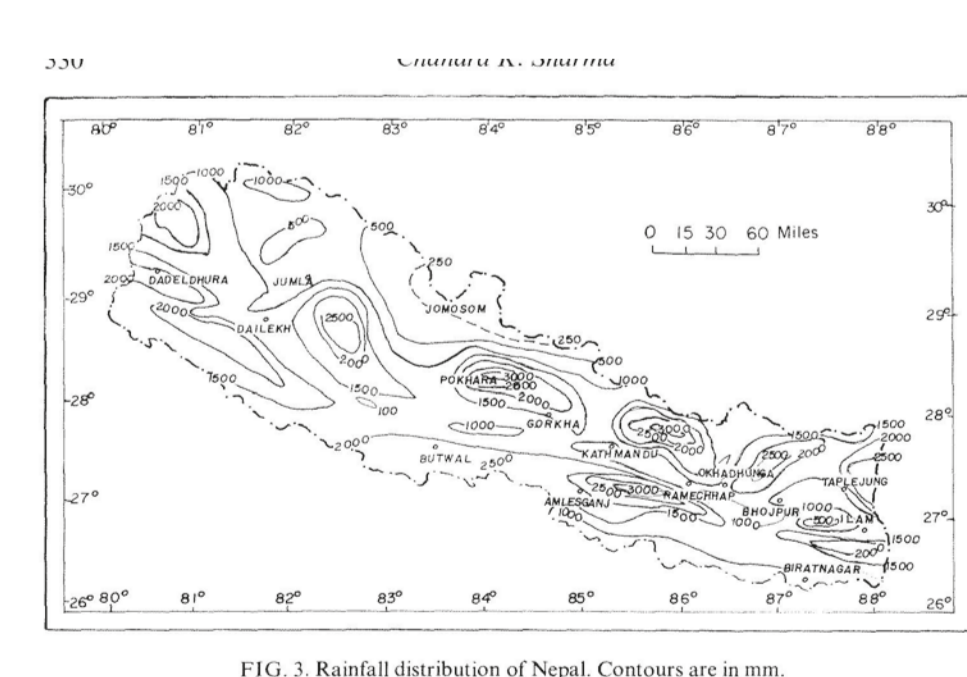

FIG. 3. Rainfall distribution of Nepal. Contours are in mm.

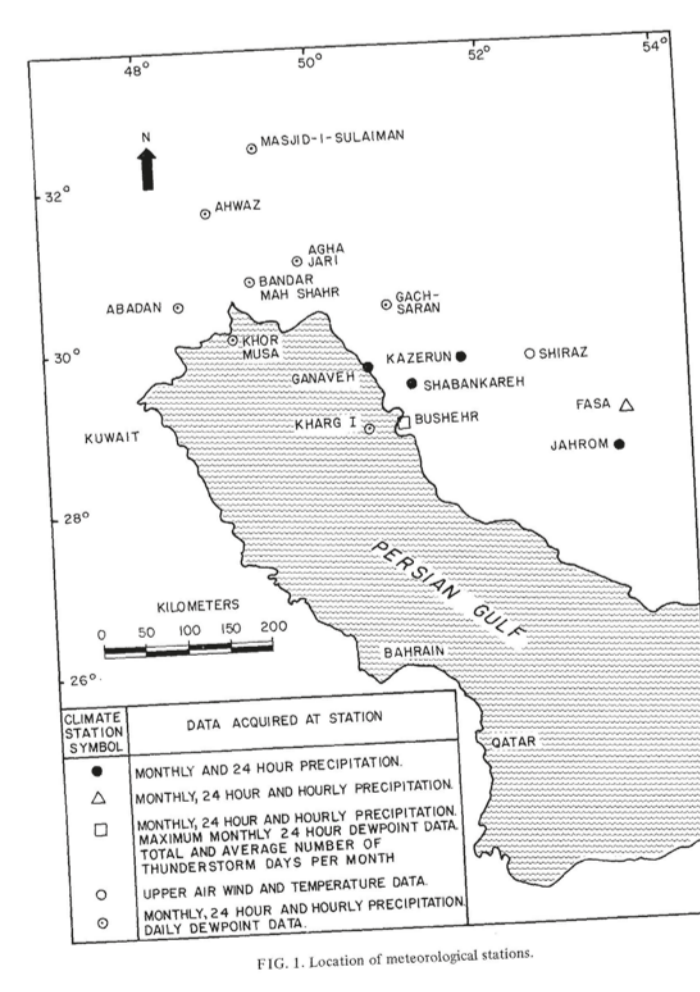

FIG. 4. Location of hydrological stations

### EFFECTS OF URBANIZATION AND INDUSTRIALIZATION ON THE HYDROLOGICAL REGIME AND ON WATER QUALITY SYMPOSIUM EFFETS DE L'URBANISATION ET DE L'INDUSTRIALISATION SUR LE REGIME HYDROLOGIQUE ET SUR LA QUALITE DE L'EAU

### SEA LEVEL ICE and CLIMATIC CHANGE

### WORLD GLACIER INVENTORY WORKSHOP/ATELIER INVENTAIRE MONDIAL DES GLACIERS

IAHS-AISH Publication No. 126

Sea Level, Ice, and Climatic Change (Proceedings of the Canberra Symposium, December 1979). IAHS Publ. no. 131.

Evidence of climatic change in Antarctica over the last 30 000 years from the Dome C ice core

C. LORIUS, L. MERLIVAT\*, P. DUVAL, J. JOUZEL\* & M. POURCHET  
Laboratoire de Glaciologie et de Géophysique de l'environnement, Grenoble, France

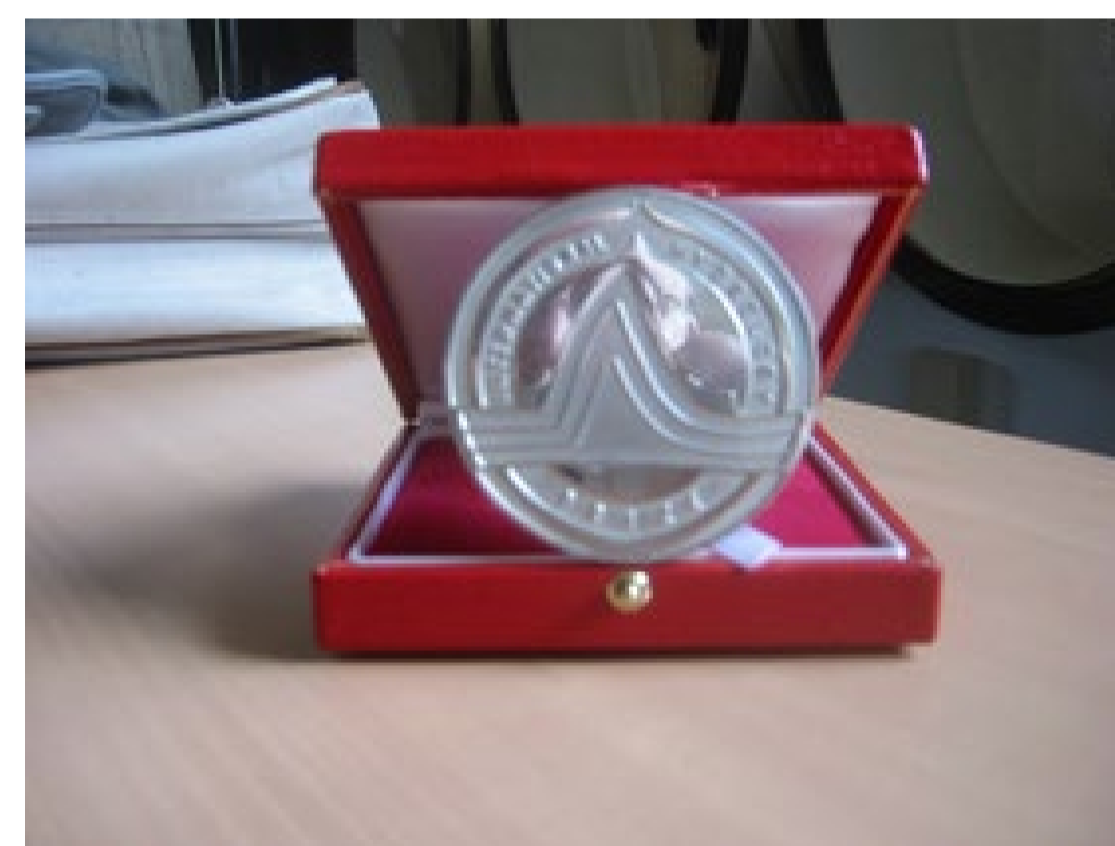

### What is a picture worth? A history of remote sensing

GERALD K. MOORE US Geological Survey, EROS Data Center, Sioux Falls, South Dakota 57198, USA

Received 4 April 1979

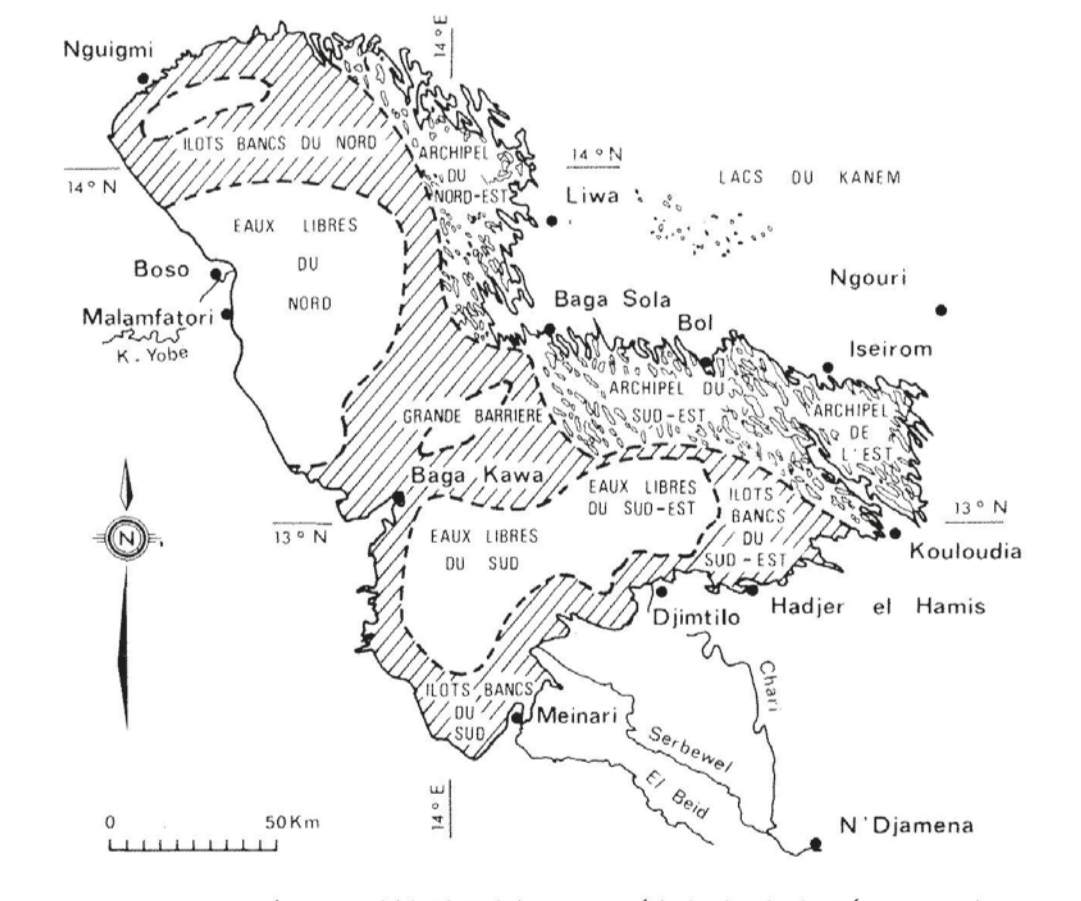

Fig. 9 - Le lac Tchad à la cote 281.50 (minimum en période de pluviosité moyenne).

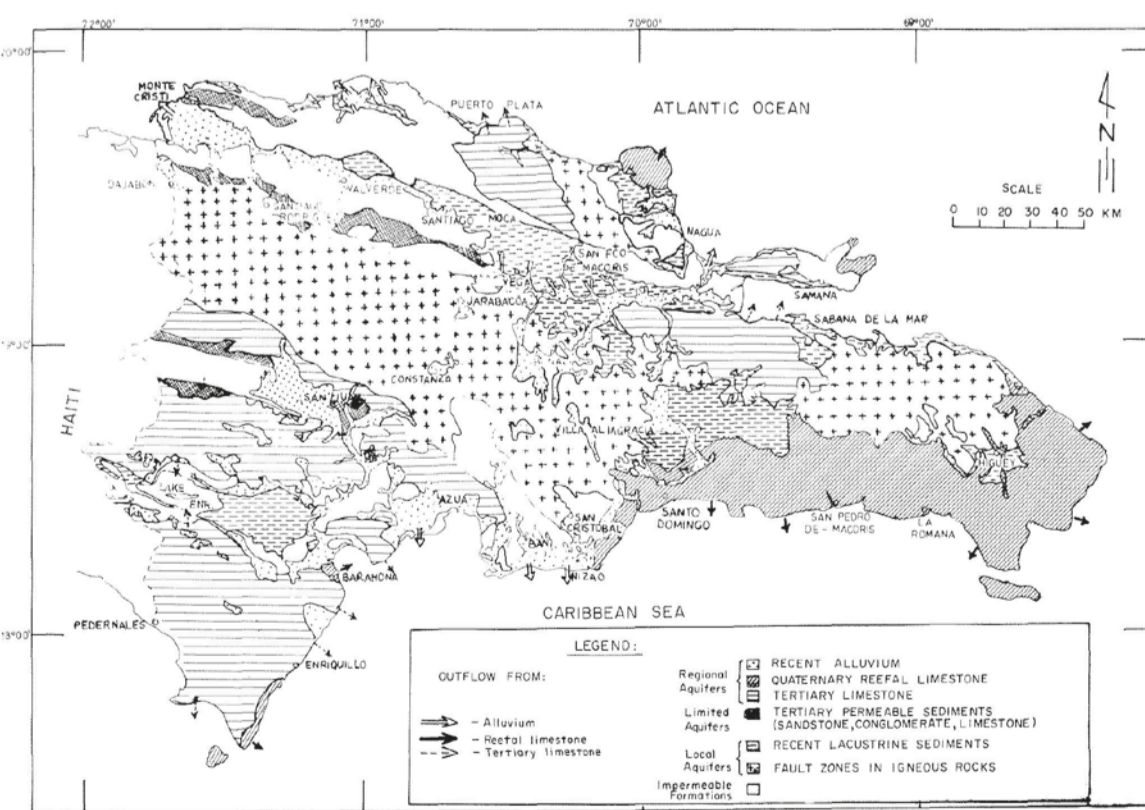

FIG. 4. The aquifers of the Dominican Republic.

### Reuse of waste water: impact on water supply planning

GEORGE F. MANGAN Jr. Office of Water Research and Technology, US Department of the Interior, Washington, DC 20240, USA

INTERNATIONAL ASSOCIATION OF HYDROLOGICAL SCIENCES  
ASSOCIATION INTERNATIONALE DES SCIENCES HYDROLOGIQUES

### HYDROLOGICAL SCIENCES BULLETIN DES SCIENCES HYDROLOGIQUES

Editor: JOHN C. RODDA, Institute of Hydrology, Wallingford, UK

Associate Editors: M. I. L'VITCH, USSR; M. SLIVITZKY, Canada; A. I. JOHNSON, USA; M. H. ZEBIDI, Tunisia; F. FOURNIER, France; J. P. RYE, UK; F. MULLER, Switzerland; M. O. VAN YAKHO, USSR; M. THOMSON, Canada; D. G. DAVY, USA; H. RICHARDS, US; H. COLBRANDER, Netherlands; H. W. UNDERHILL, PAO; C. TOEBES, New Zealand; M. A. KOHLER, USA; L. P. REAR, USA; A. P. SCHICK, Israel; H. W. ANDERSON, USA; M. RAGAN, USA; G. KIENTZY, Hungary.

The *Hydrological Sciences Bulletin* will be followed by other associations who have not already done so.  
The attractive present style of the Bulletin was acquired in 1972 thanks to the efforts of the new editor John C. Rodda and his collaborators.  
Congratulations to IAHS for this 21st anniversary of their Bulletin and best wishes for more success in the many years to come.

A.A. Ashour  
President of IUGG

Telegram from UNESCO

CONGRATULATIONS ON 21ST YEAR OF PUBLICATION HYDROLOGICAL SCIENCES BULLETIN. WOULD THANK YOUR ASSOCIATION FOR FRUITFUL COOPERATION WITH UNESCO MAKING POSSIBLE DID IN THE PAST AND HOP RECENTLY WISH SUCCESSFUL CONTINUATION OF YOUR ACTIVITIES.

J. DA COSTA  
UNESCO

Contribution from the World Meteorological Organization

IAHS AND OPERATIONAL HYDROLOGY by Professor Jaromir Nimec\*

The Bulletin of the IAHS is now celebrating its 21st birthday and the Secretary General and staff of the Secretariat of the World Meteorological Organization send their congratulations and good wishes on this happy occasion.

The fact that the Bulletin has continued for so long a period is in itself a good indication of its usefulness, but it has done much more to deserve congratulations and good wishes than simply having existed for 21 years. As the years have passed the Bulletin has in fact earned for itself a high reputation as an effective medium for the dissemination of hydrological knowledge and information and has established for itself a special place of esteem and indeed affection among the international hydrological community as a whole and not least in WMO.

On such an occasion it is appropriate to review the relationship between IAHS and WMO, especially in view of the wide responsibilities in operational hydrology which WMO has accepted, and there could be no better means of publishing this review than in the pages of the Bulletin.  
The history of hydrology as a science itself goes back of course a very long time—over 3000 years. Readers of the Bulletin will doubtless recall that in 1974 an international symposium was held to commemorate 300 years of hydrology. At that symposium, it was observed (Dunne and Nimec, 1974) that fifty years previously, i.e. in 1924, the International Association of Hydrological Sciences (then known as the International Association of Scientific Hydrology) had been established as a first recognition of the need for the development of international cooperation in this field, and that this need had since greatly increased, particularly during the past two decades.  
Several circumstances have combined to bring about this development. The water cycle, which is the main concern of hydrology, is itself a large-scale process and therefore its study

### HYDROLOGY IN THE DEVELOPING COUNTRIES AND THE ROLE OF IAHS by Prof. Ir. A. Volker\*

### THE DEVELOPMENT OF HYDROLOGICAL CONCEPTS IN BRITAIN AND IRELAND BETWEEN 1674 AND 1874\*

J.C.I. DOOGUE  
Department of Civil Engineering, University College, Dublin, Ireland  
Revised MS. received 22 May 1974

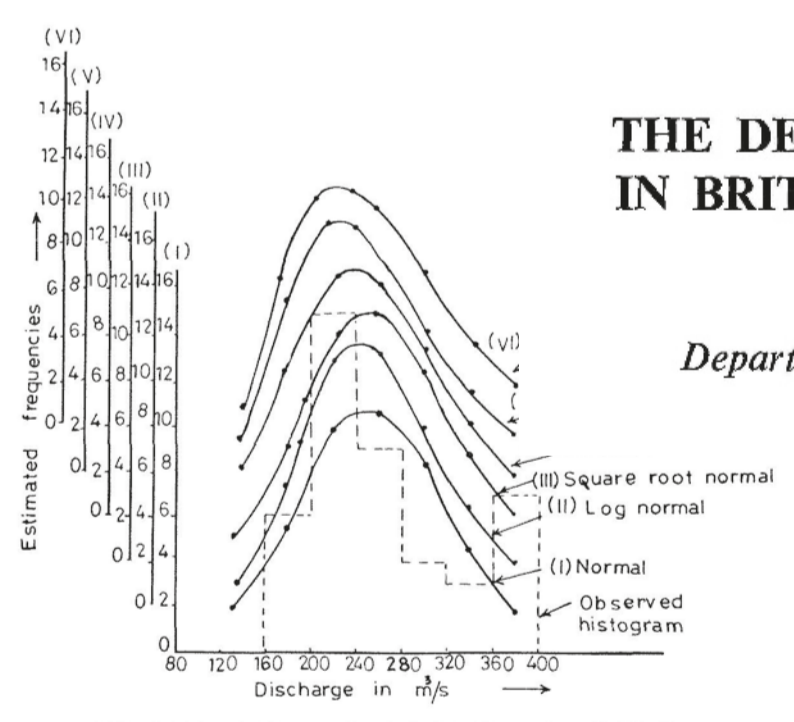

FIG. 1. Estimated frequencies at Baghdad by various distributions.

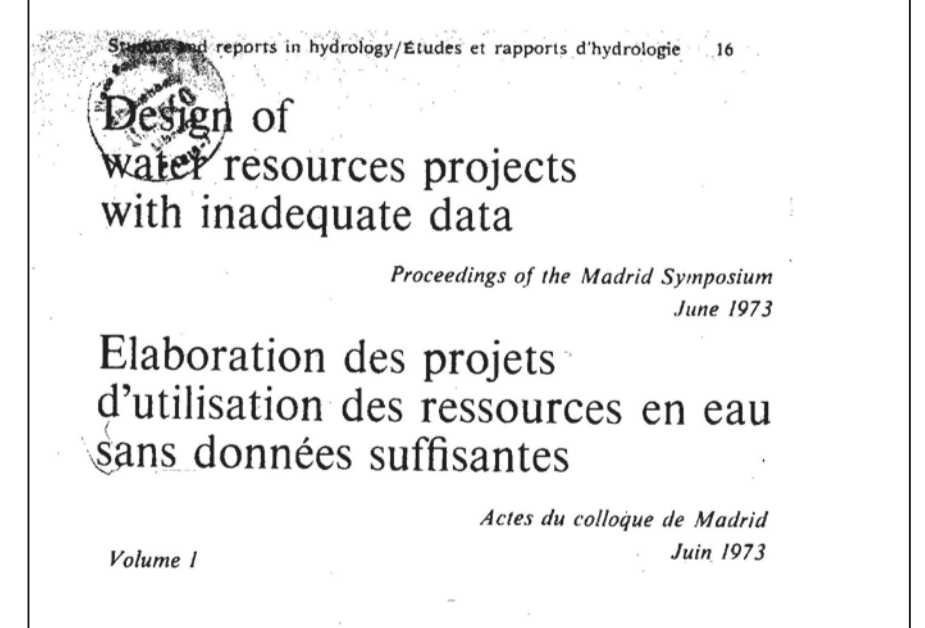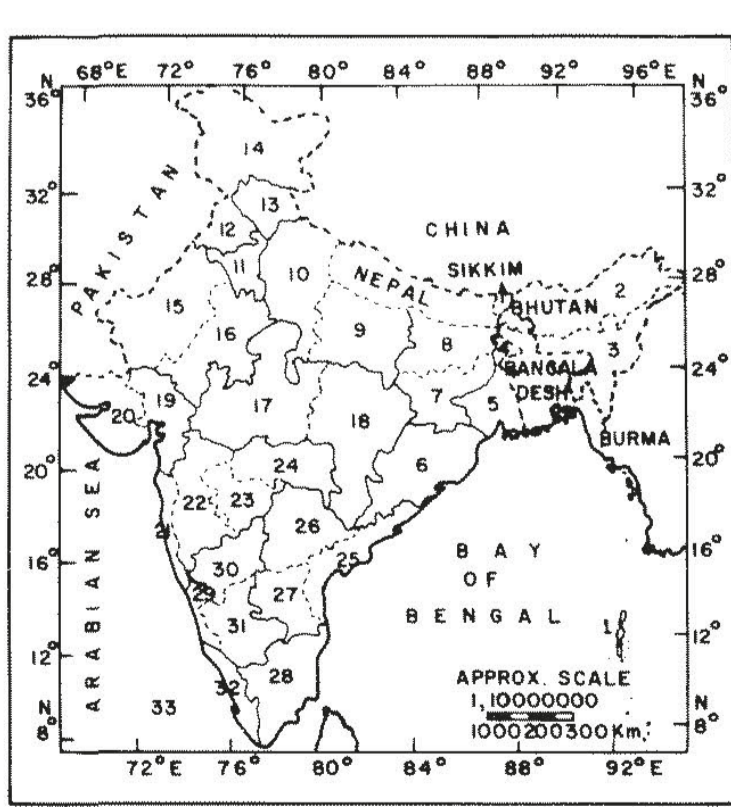

FIG. 4. The aquifers of the Dominican Republic.

### LAND SUBSIDENCE SYMPOSIUM

### SUBSIDENCE TERRESTRE

### FLASH FLOODS SYMPOSIUM CRUES BRUTES

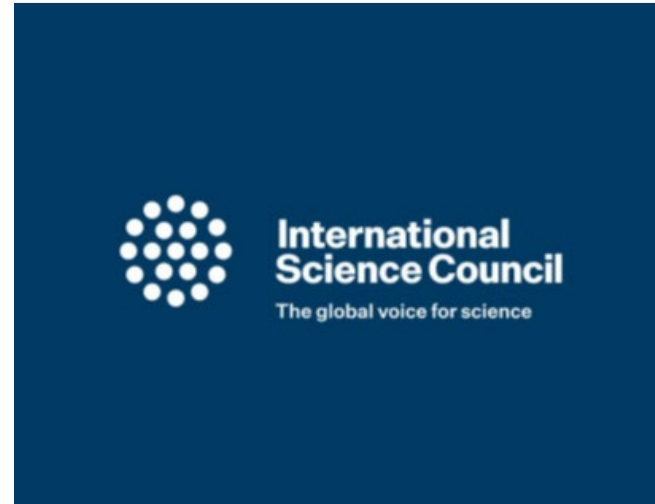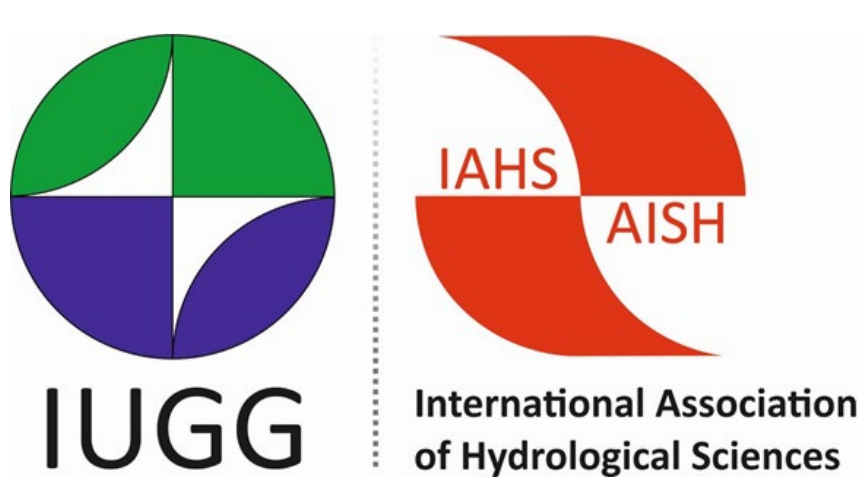

www.iahs.info Free membership

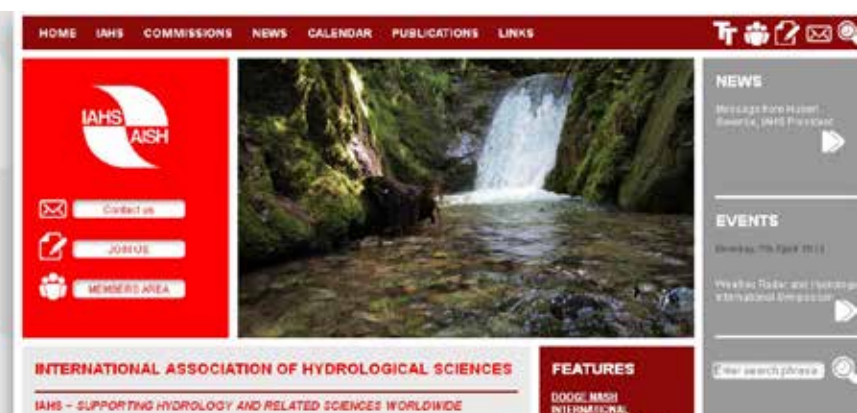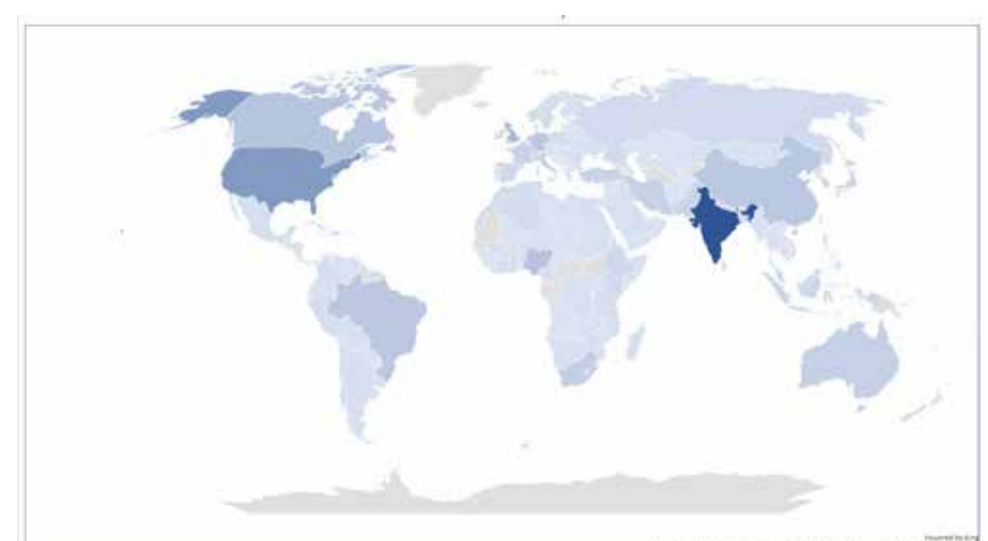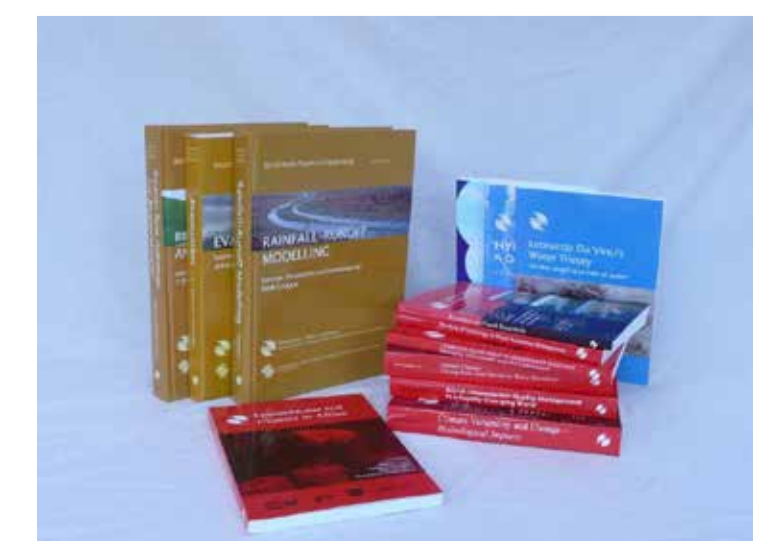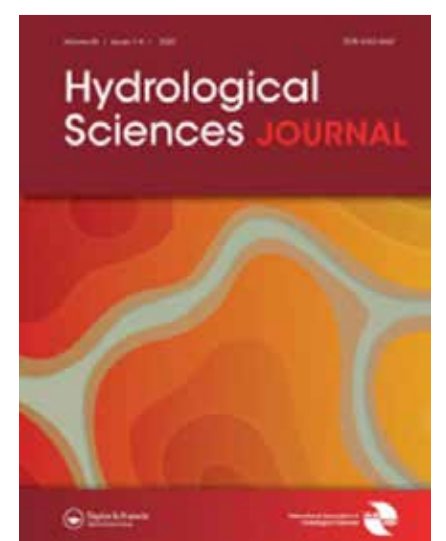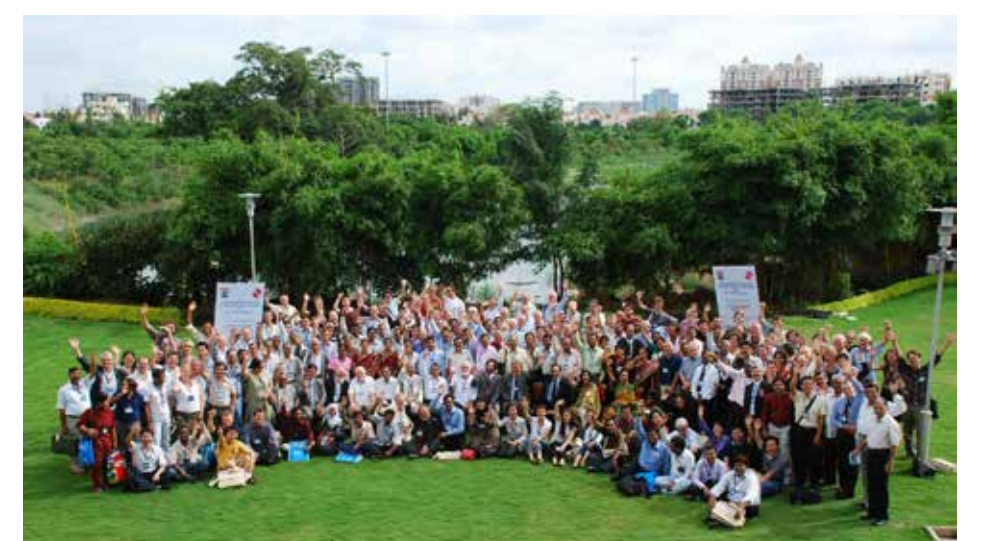

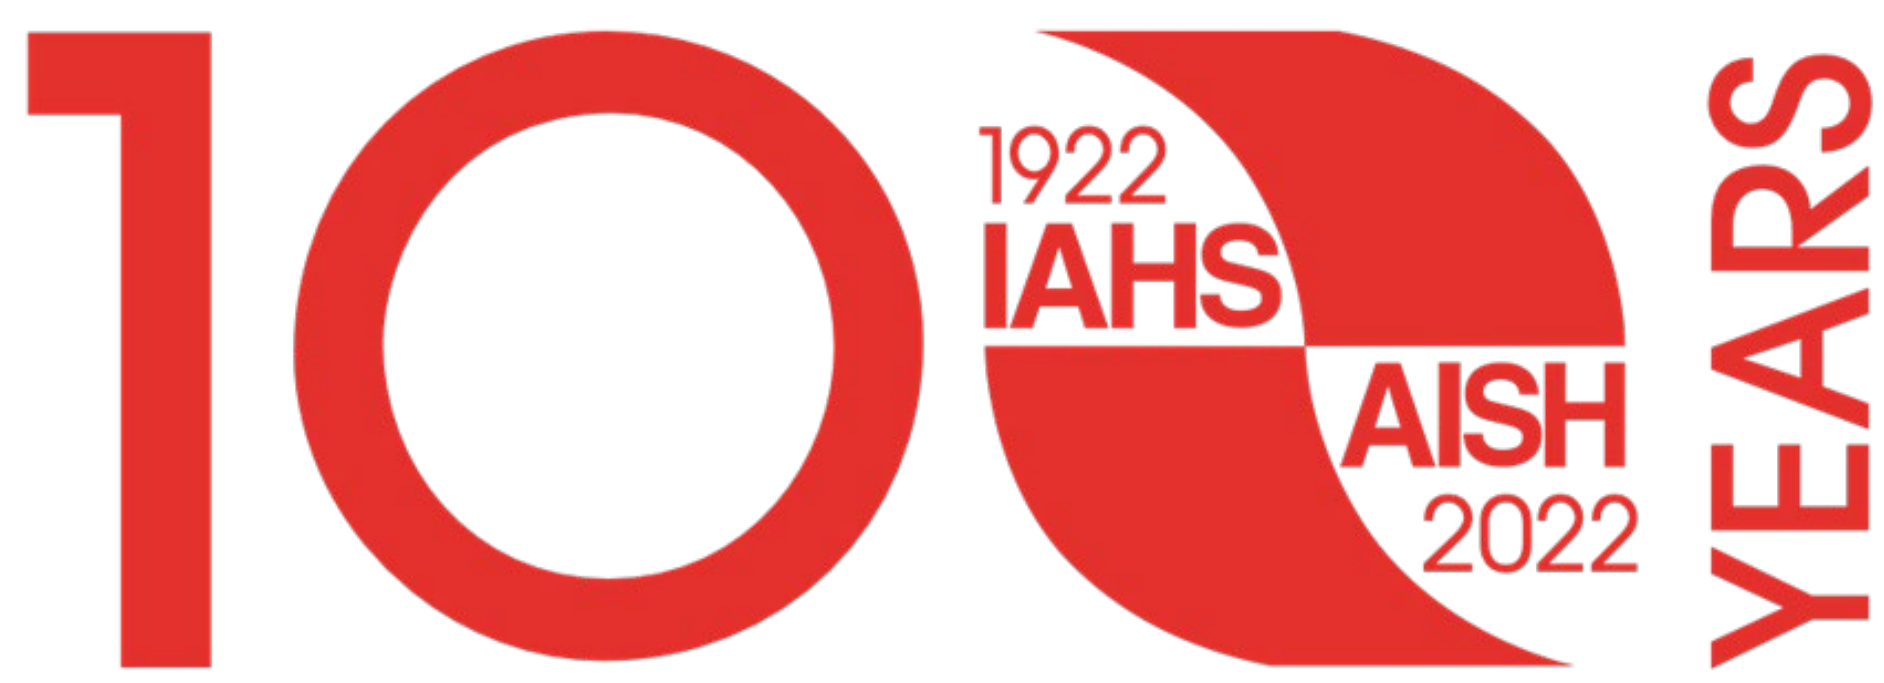

# 1982-1992

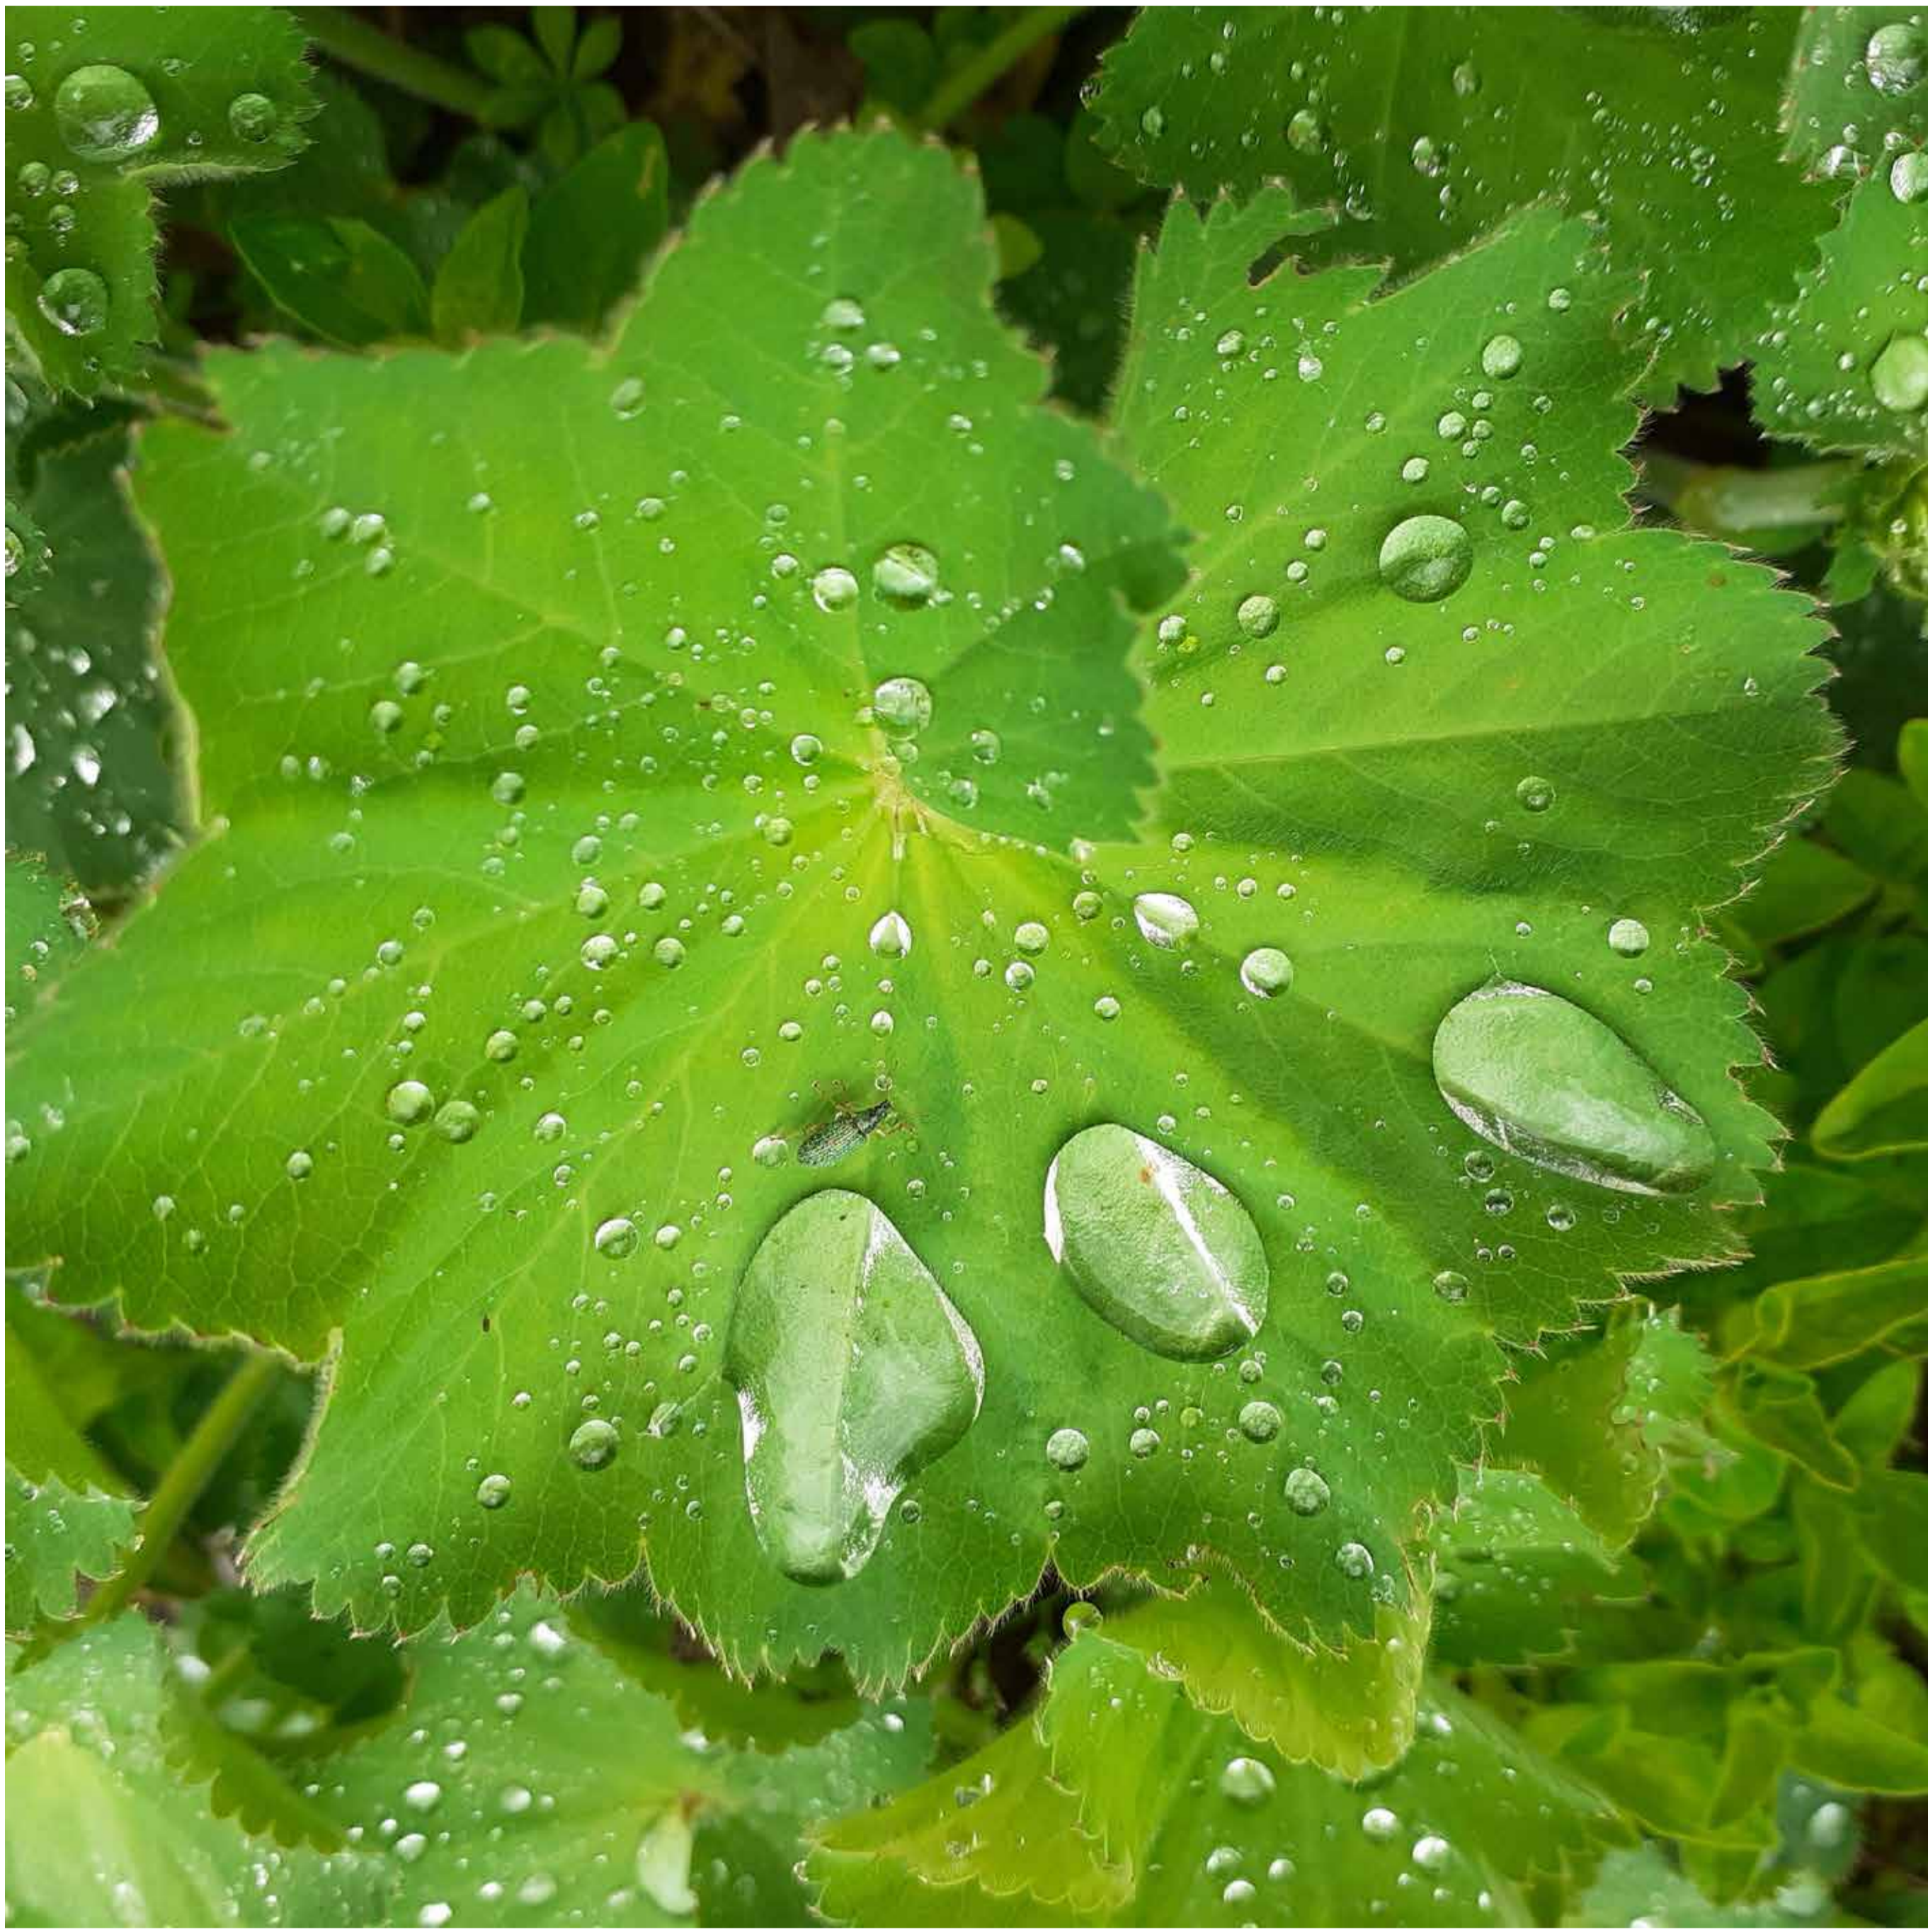

**1982: First Scientific Assembly in Exeter, UK**  
in addition to IUGG General Assemblies

**1983: Creation of the Tison Award for young hydrologists**

**1992: Inception of the UNESCO IHP-IAHS Kovacs Colloquium series**

**Contribution to the UNESCO-WMO  
International Glossary of Hydrology, v1 in 1974 - v2 in 1992**

*Hydrological Sciences - Journal - des Sciences Hydrologiques*, 35, 6, 12/1990

**The education of hydrologists**  
(Report of an IAHS/UNESCO Panel on hydrological education)

**J. E. NASH**  
*Department of Engineering Hydrology, University College, Galway, Ireland*

**P. S. EAGLESON**  
*Ralph M. Parsons Laboratory, Department of Civil Engineering, Building 48-353, Massachusetts Institute of Technology, Cambridge, Massachusetts 02139, USA*

**J. R. PHILIP**  
*Commonwealth Scientific and Industrial Research Organisation, PO Box 624, Canberra, ACT, Australia*

**W. H. VAN DER MOLEN**  
*Lindelaan 5, 6871 DX Boven, The Netherlands*

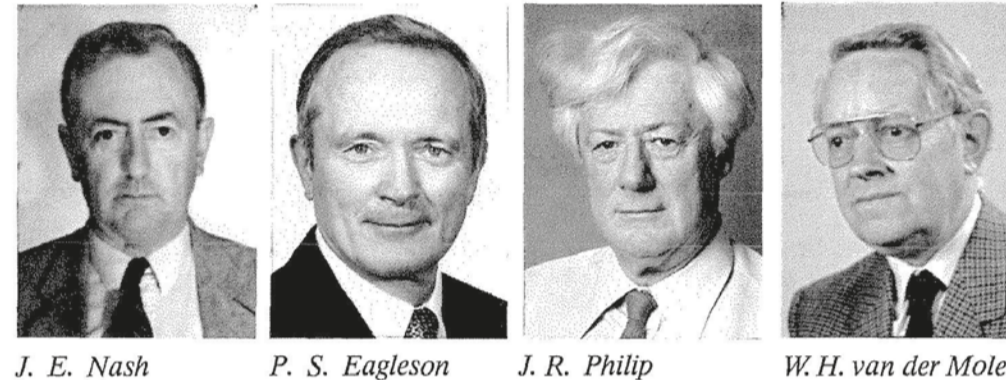

**PREFACE by the IAHS President**

In the late 1987, I began discussion on the education of hydrologists with Dr S. Dumitrescu, Director of the Division of Water Sciences of UNESCO. Our concern is reflected in the following two excerpts from the related correspondence:

There has been a growing awareness that hydrology as a geophysical science is making slow progress and has no solid foundations. A major (or perhaps the major) factor in this unsatisfactory situation is the fact that the majority of hydrologists are not trained as scientists but as technologists. It seems self-evident that a science cannot be founded on a technological education. Hence, if we are not paying merely lip-service to the science of hydrology, we should make an effort to provide it with an adequate educational basis. - (Klemes)

"... I fully agree with you that the time has come to better define the position of hydrology as a geophysical science, its relations with other

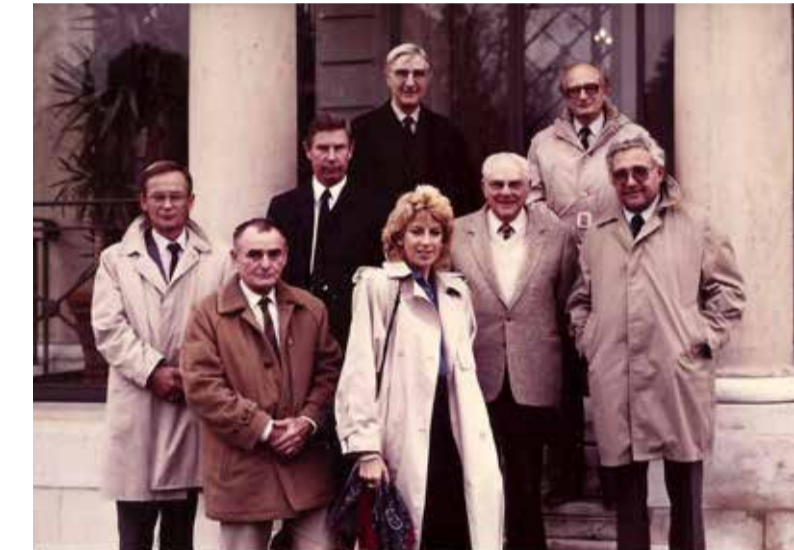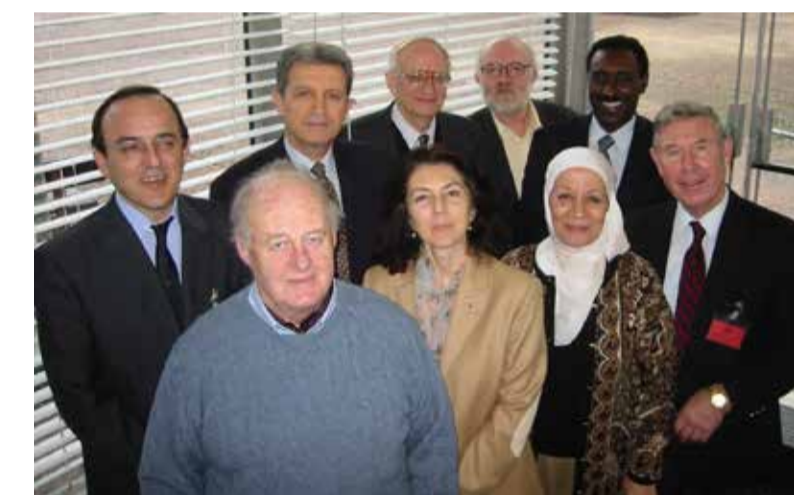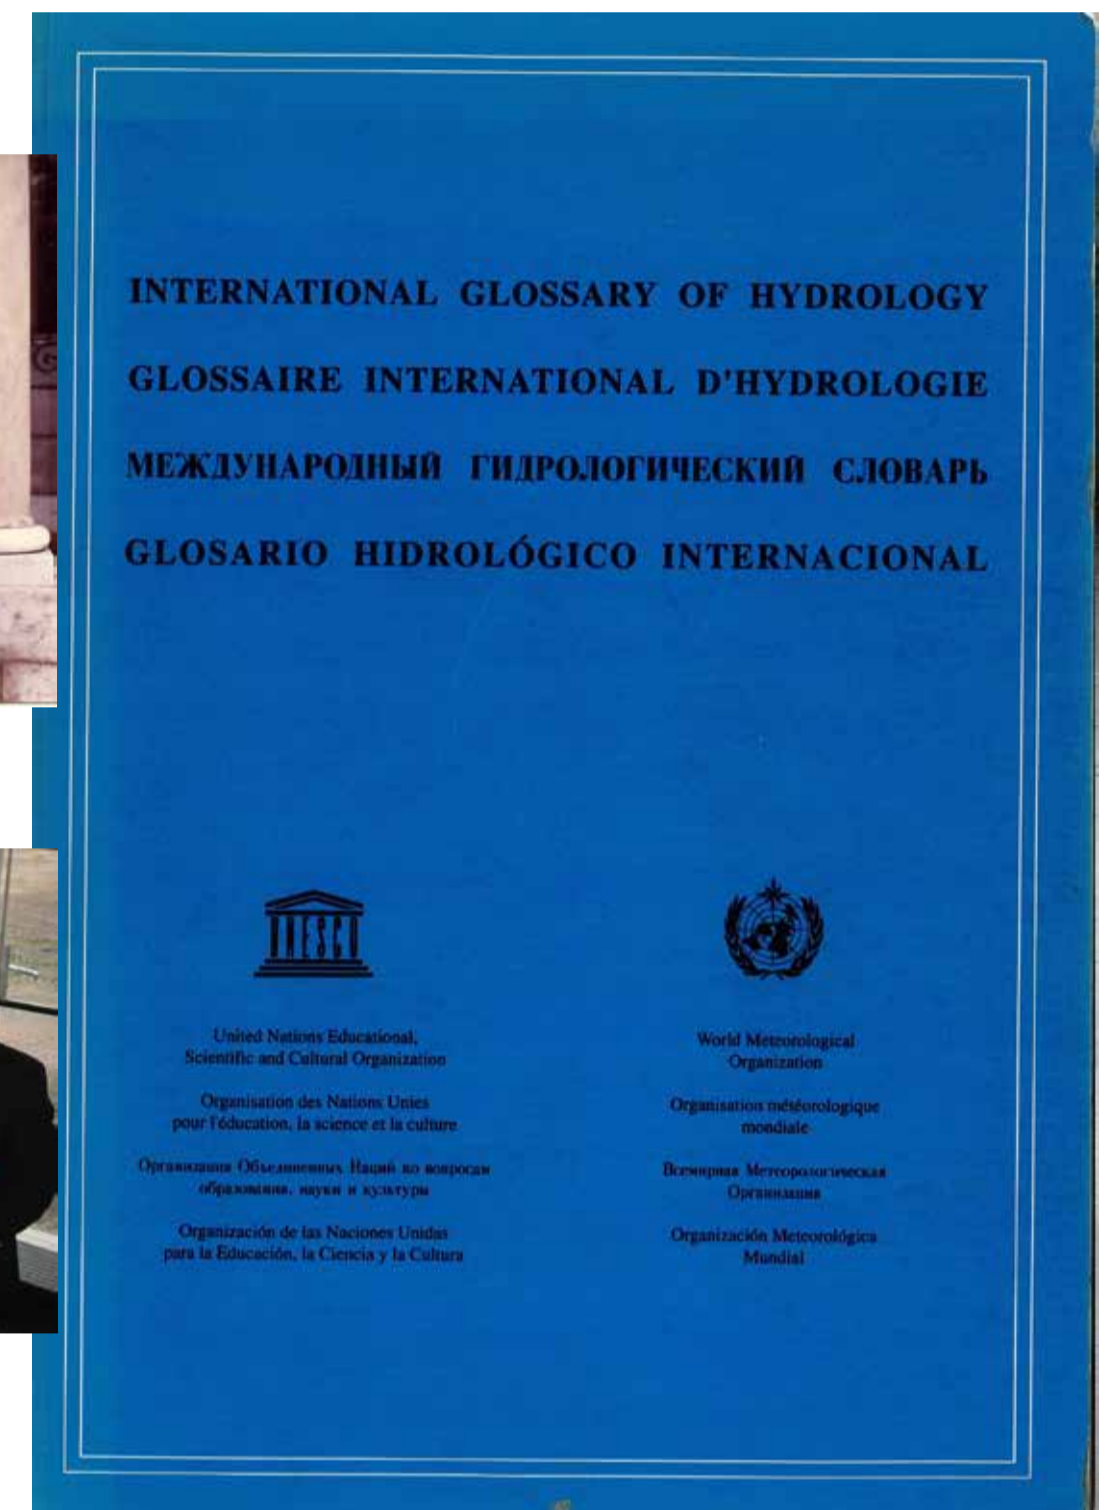

*Hydrological Sciences - Journal - des Sciences Hydrologiques*, 36, 4, 8/1991

**Climate and water – a call for international action\***

**A. J. ASKEW**  
*Hydrology and Water Resources Department, World Meteorological Organisation, 41 Avenue Giuseppe Moni, CP2300, CH-1211 Geneva, Switzerland*

**Abstract** The work undertaken by climatologists and atmospheric physicists during the 1980s has led to far more consistent and precise predictions of future climate change being made at the close of the decade than had been made at its start. Governments have responded by calling for more information and, in some cases, have taken steps to mitigate the effects of such a change. The hydrological community has not been idle and many projects have been launched to study the interaction between climate change, the hydrological regime and water resources. However, the move towards larger scale international projects with major hydrological components will make new and extensive demands on the hydrological community, to which it must respond.

*Hydrological Sciences - Journal - des Sciences Hydrologiques*, 33, 1, 2/1988

**Hydrology in perspective**

**JAMES C. I. DOOGIE**  
*Department of Engineering Hydrology, University College, Galway, Ireland*

**Abstract** Scientific hydrology is considered against the background of the classical development of scientific knowledge, and applied hydrology is considered in the context of the many diverse factors relevant to providing water for health and for food throughout the world.

**L'hydrologie vue en perspective**

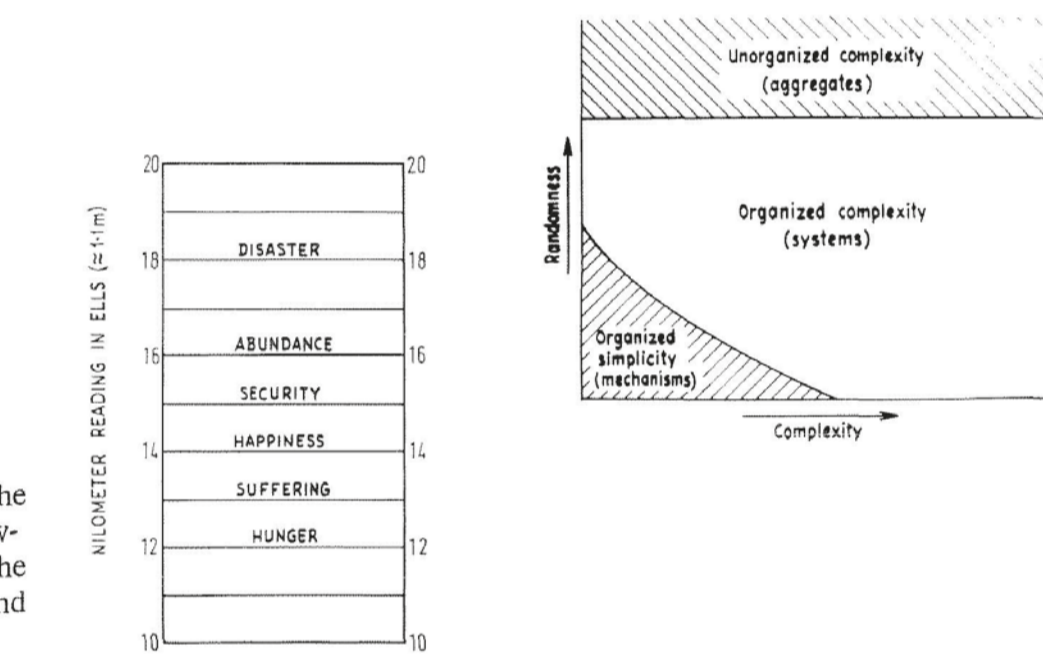

Fig. 1 Pliny's social calibration of nilometer readings.

*Hydrological Sciences - Journal - des Sciences Hydrologiques*, 31, 2, 6/1986

**The hydrology of tomorrow**

**ZBIGNIEW W. KUNDZEWICZ**  
*Institute of Geophysics, Polish Academy of Sciences, Pasteura 3, 00-973 Warsaw, Poland*

*Hydrological Sciences - Journal - des Sciences Hydrologiques*, 33, 2, 4/1988

**Hydrological sciences – society's needs\***

**J. P. BRUCE**  
*WMO, CP 5, CH-1211 Geneva 20, Switzerland*

*Hydrological Sciences - Journal - des Sciences Hydrologiques*, 33, 1, 2/1988

**Present and future perspectives on water resources in developed countries**

**UGO MAIONE**  
*Institute of Hydraulics, Politecnico di Milano, Piazza Leonardo da Vinci 32, 20133 Milan, Italy*

*Hydrological Sciences - Journal - des Sciences Hydrologiques*, 31, 4, 12/1986

**International cooperation in water resources management – helping nations to help themselves\***

**JOHN STUART GLADWELL**  
*Division of Water Sciences, UNESCO, 7 Place de Fontenay, 75700 Paris, France*

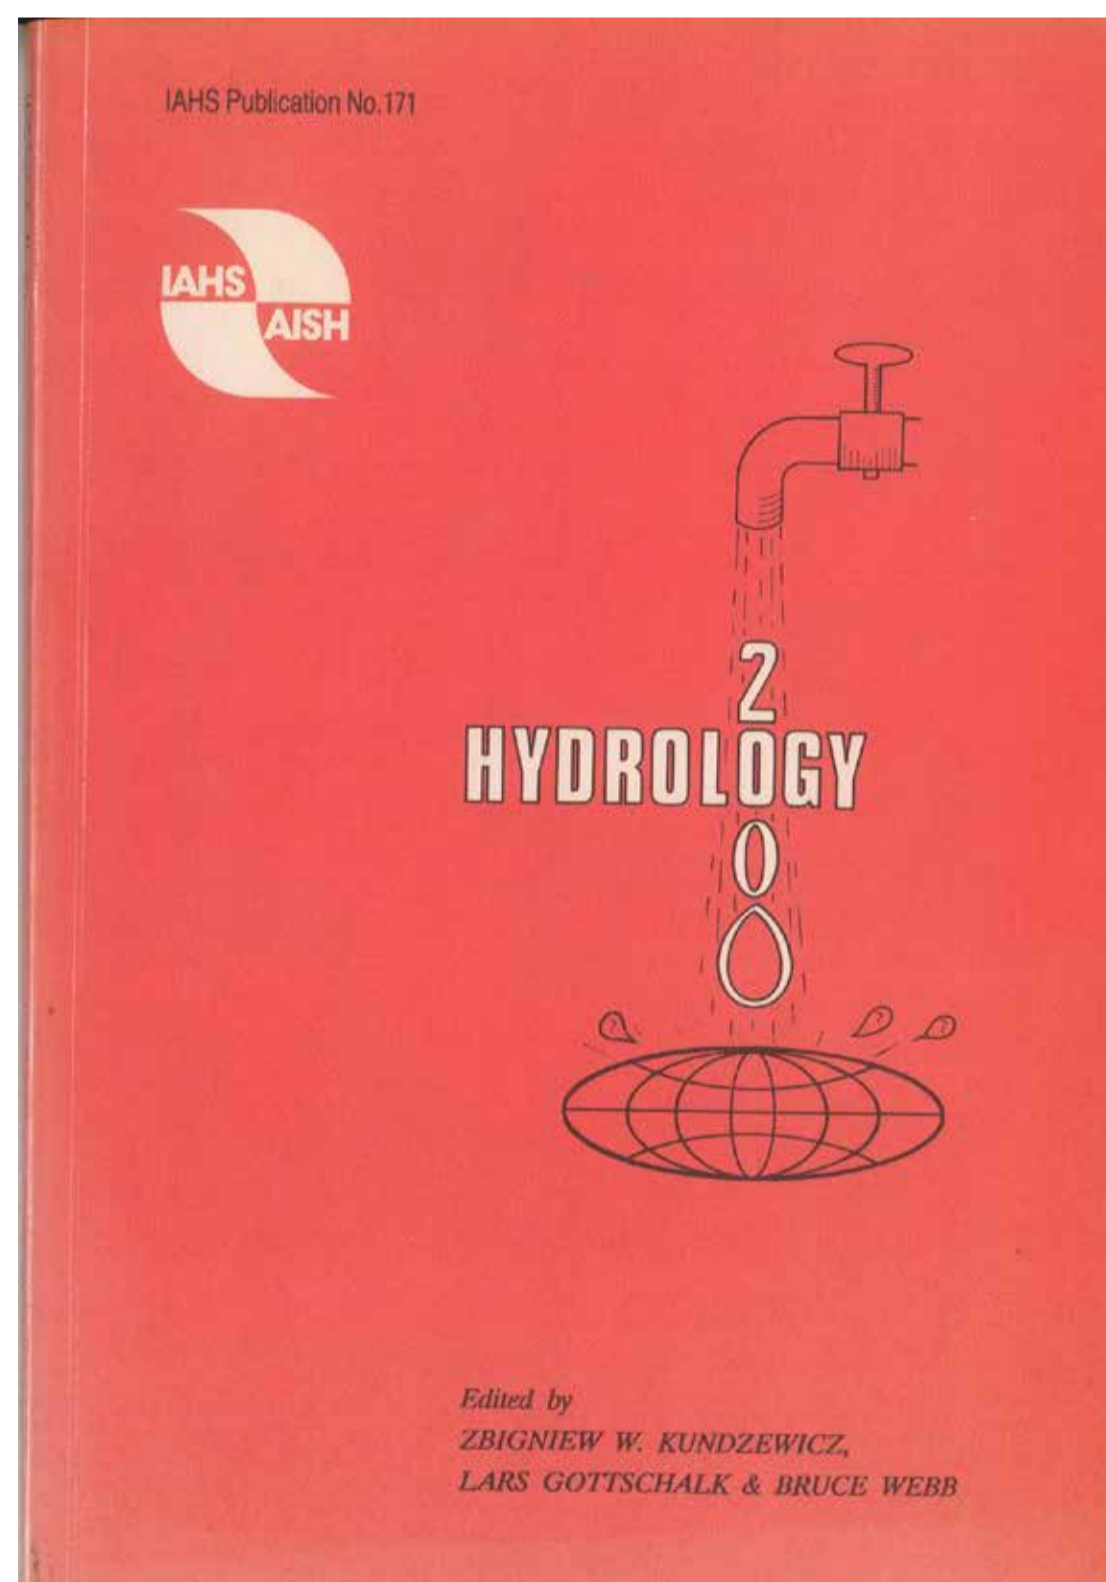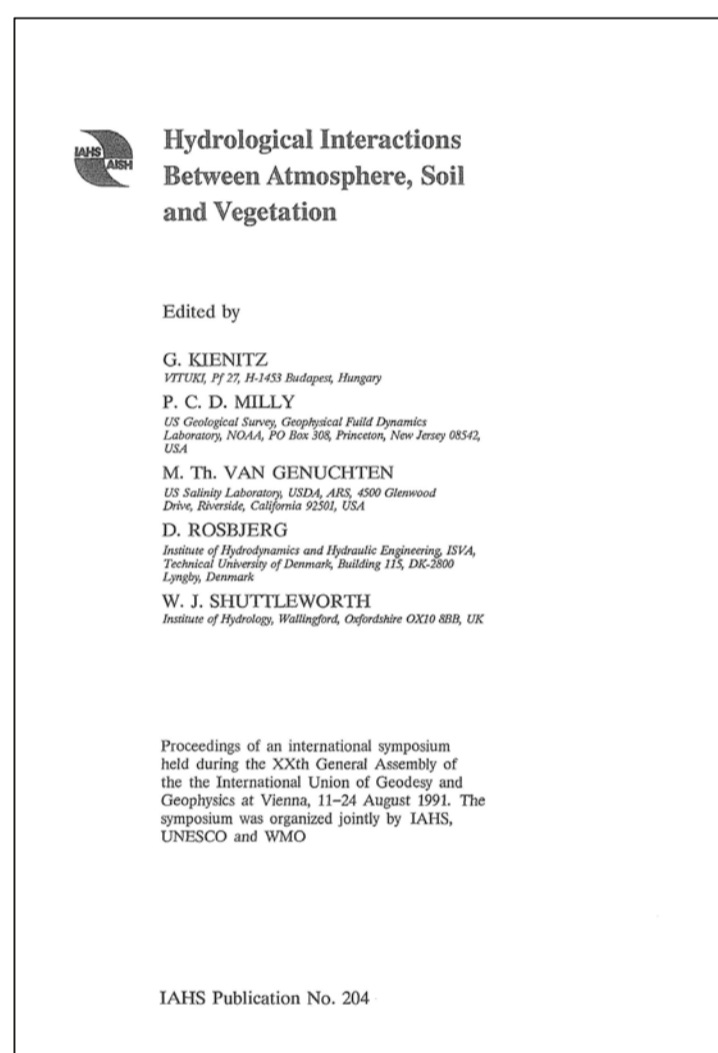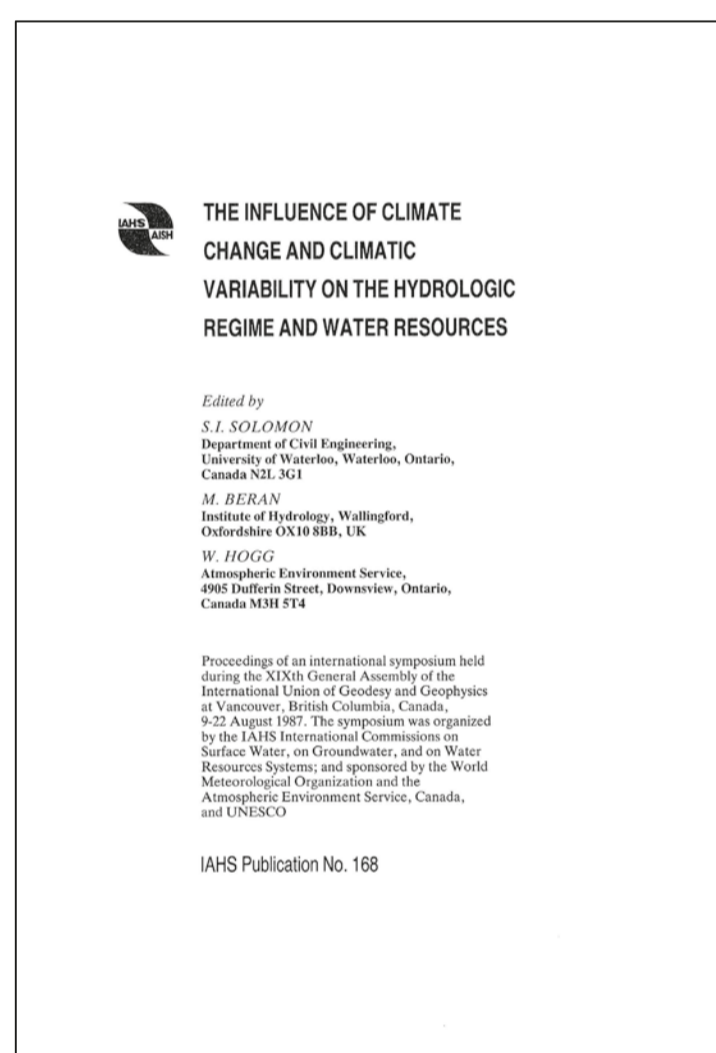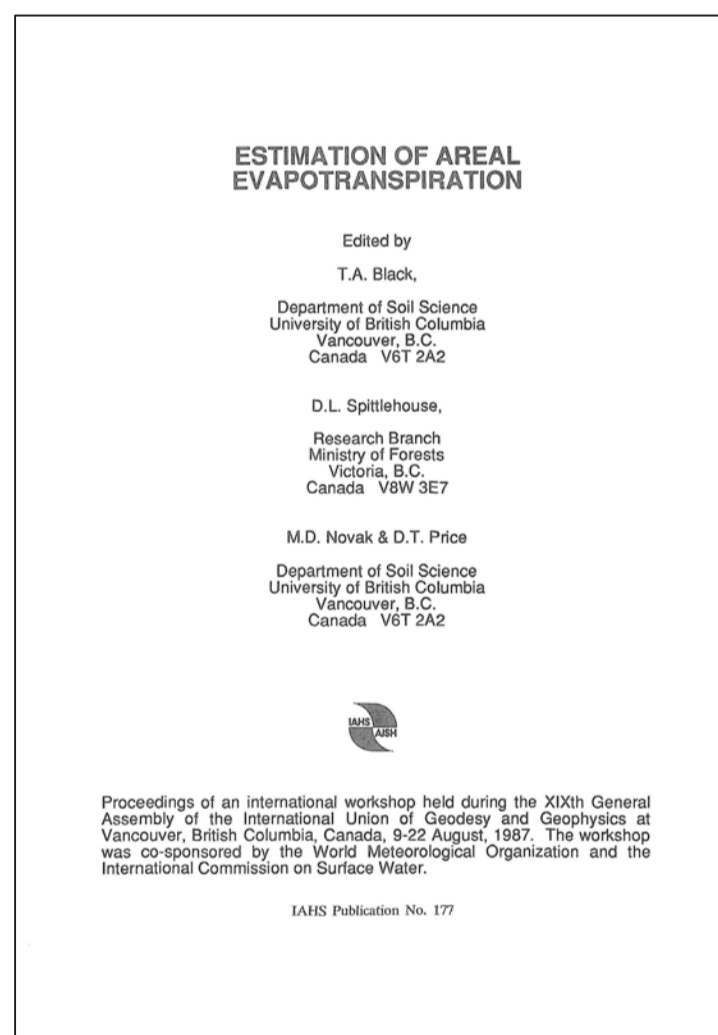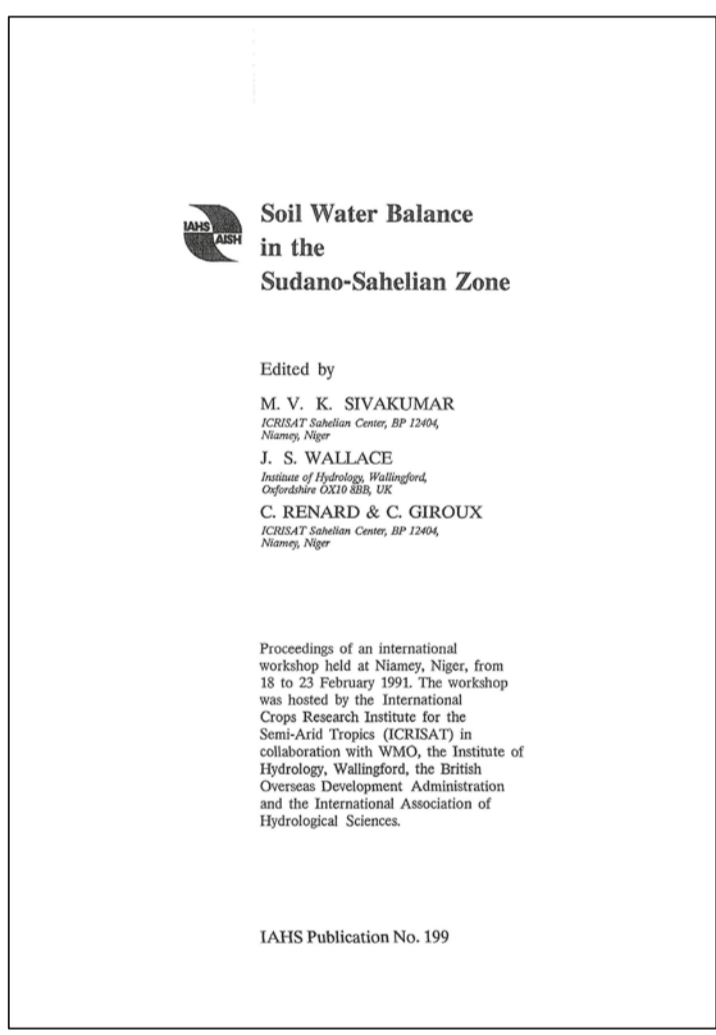

*Hydrological Sciences - Journal - des Sciences Hydrologiques*, 27, 3, 9/1982

**Sensitivity of water resource systems to climate variation**

**J. NEMEC**  
*Hydrology and Water Resources Department, WMO Secretariat, CP No. 5, CH-1211 Geneva, Switzerland*

**J. SCHAAKE**  
*Hydrologic Services Division, US NOAA-NWS, Office of Hydrology, Silver Spring, Maryland 20910, USA*

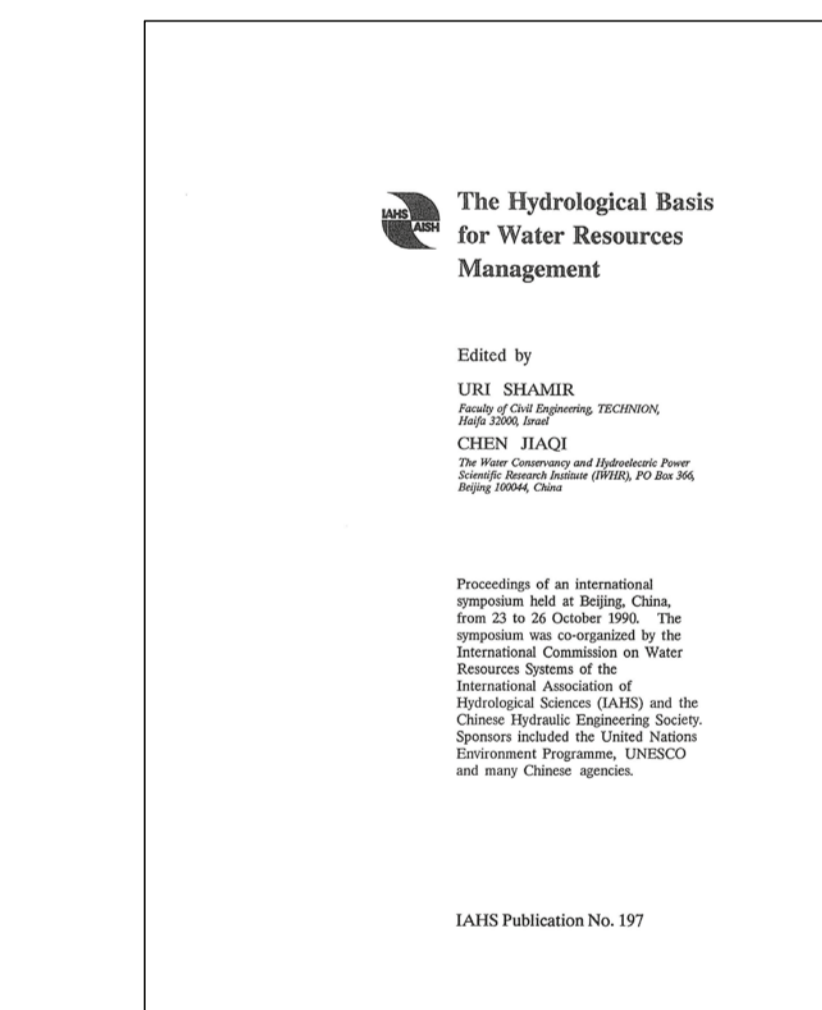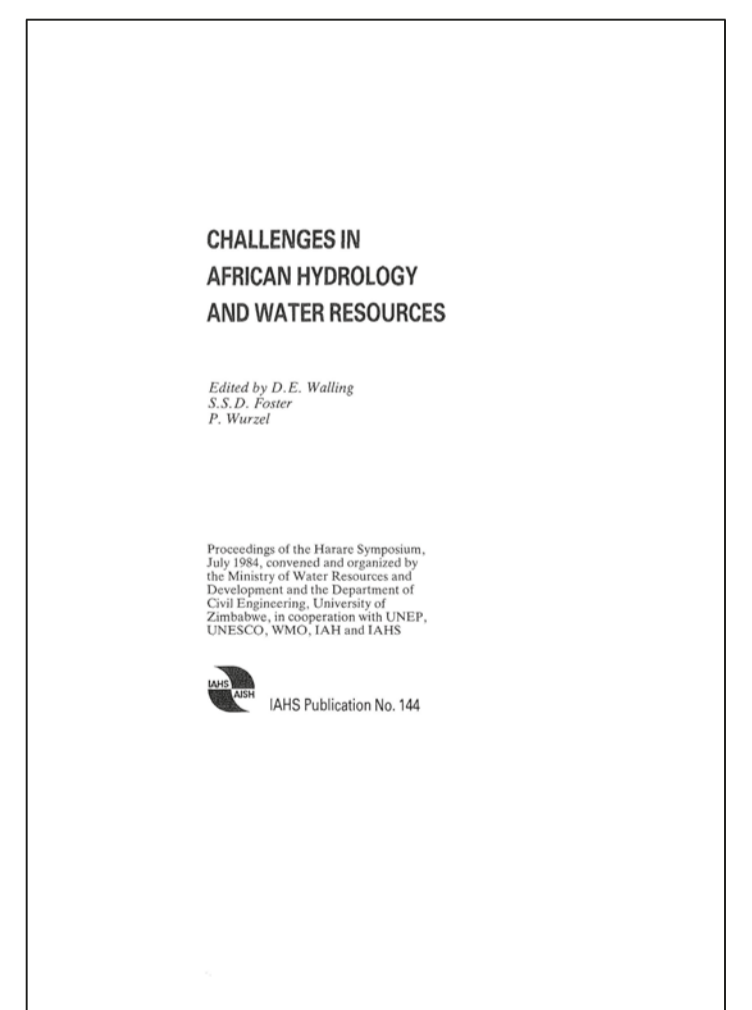

*Hydrological Sciences - Journal - des Sciences Hydrologiques*, 36, 5, 10/1991

**Intercomparison of evapotranspiration estimates**

**S. MOHAN**  
*Department of Civil Engineering, Indian Institute of Technology, Madras 600 036, India*

*Hydrological Sciences - Journal - des Sciences Hydrologiques*, 31, 1, 3/1986

**Operational testing of hydrological simulation models**

**V. KUDVEŠ**  
*National Hydrology Research Institute, Environment Canada, Ottawa, Ontario, Canada K1A 0E7*

*Hydrological Sciences - Journal - des Sciences Hydrologiques*, 36, 3, 6/1991

**Regional climate change impacts: I. Impacts on water resources\***

**M. A. MIMIKOU & Y. S. KOUVOPOULOS**  
*National Technical University of Athens, Department of Civil Engineering, Division of Water Resources, Hydraulic and Maritime Engineering, 5, Iroon Polytechnion, 157 03 Athens, Greece*

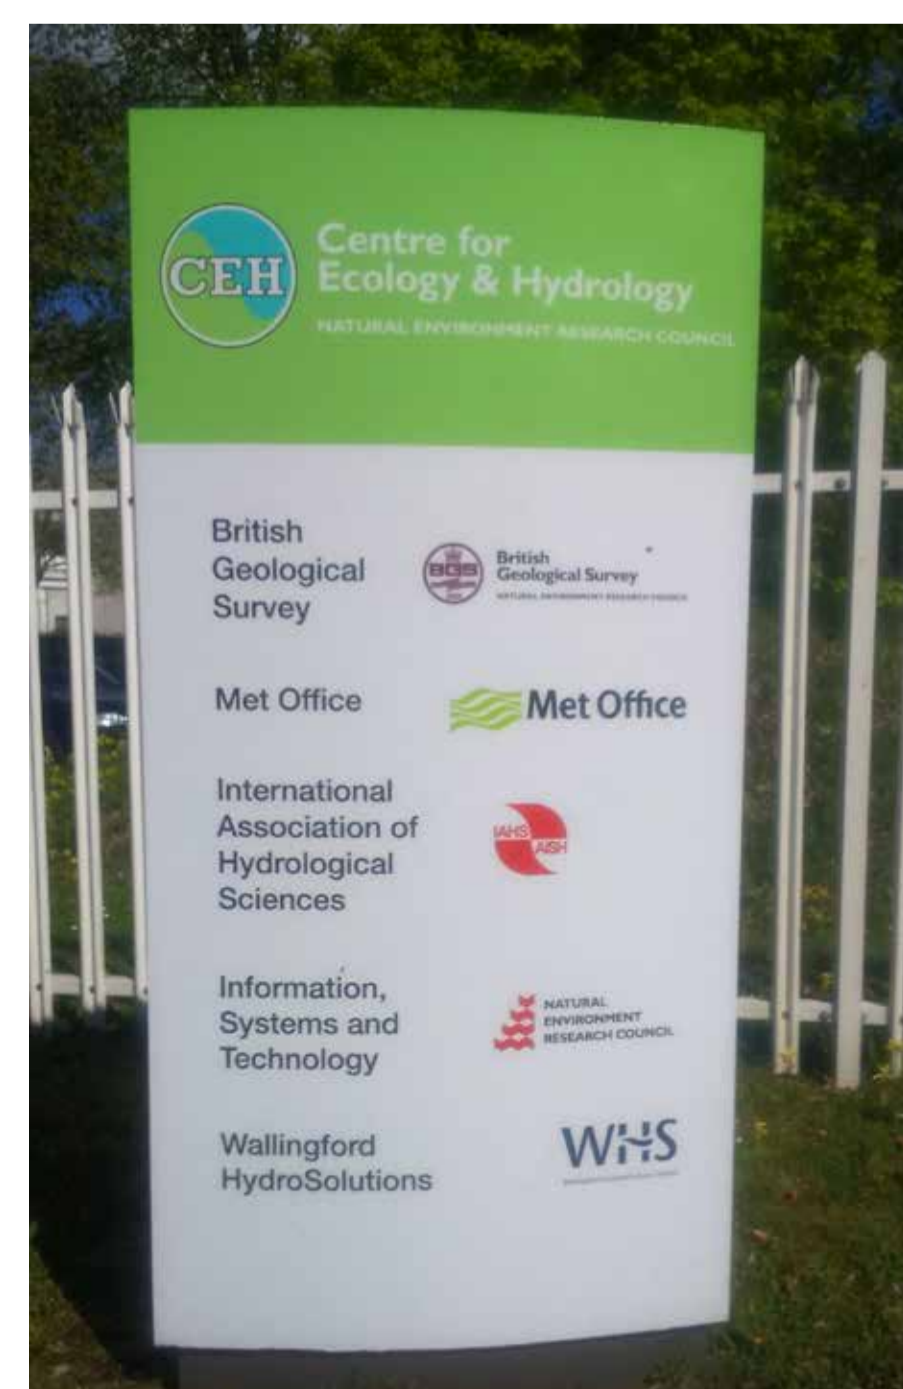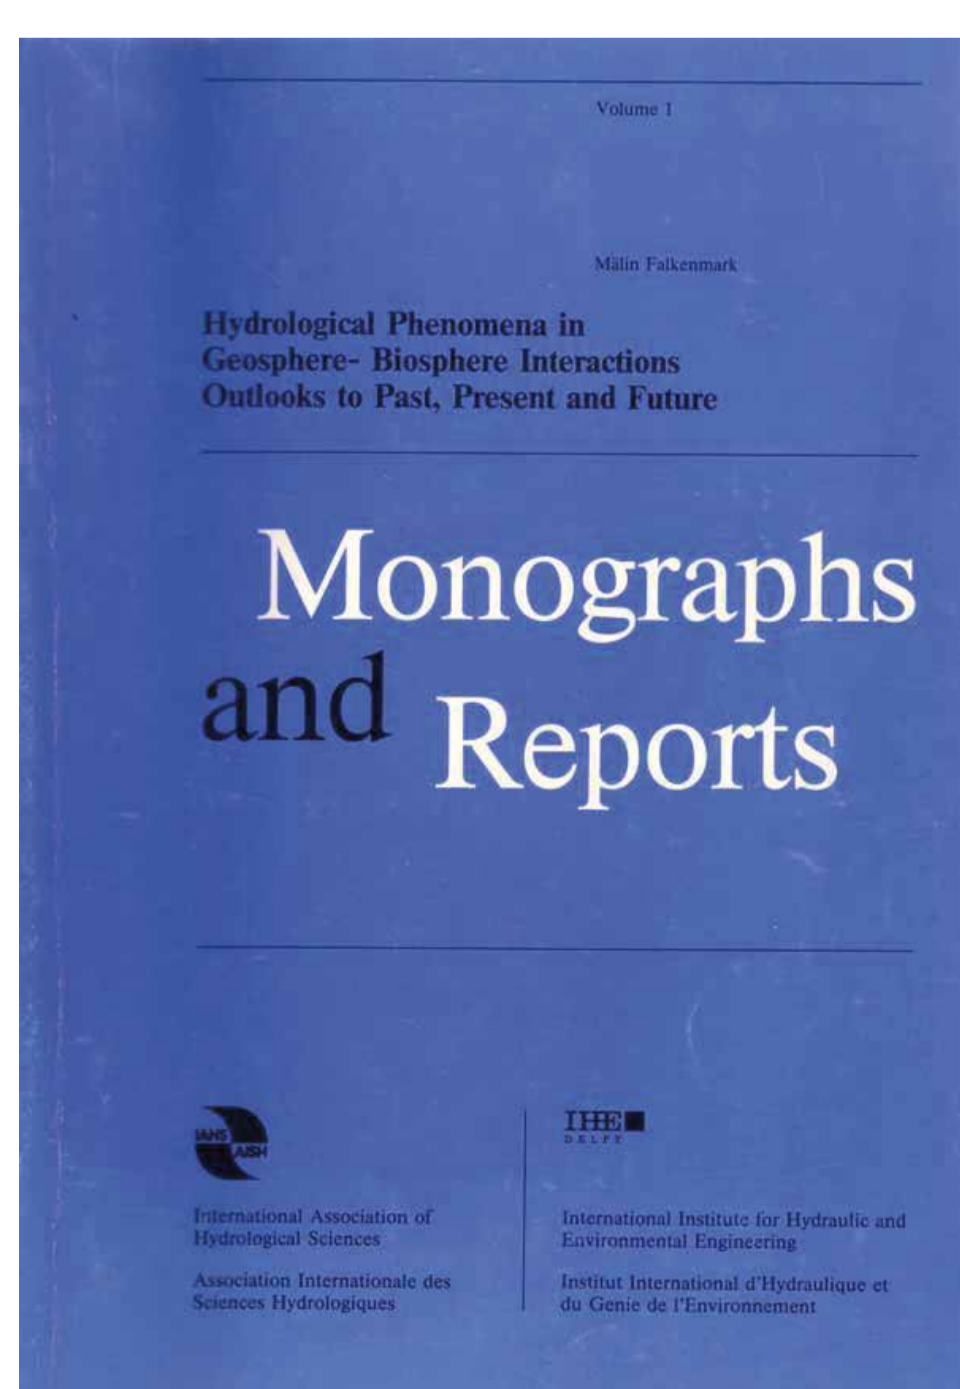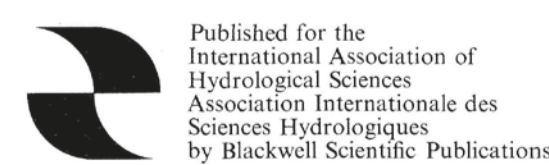

Volume 27, Number 1, March 1982

**HYDROLOGICAL SCIENCES  
JOURNAL  
DES SCIENCES HYDROLOGIQUES**  
*Formerly Hydrological Sciences Bulletin*

**Editor Robin T. Clarke**  
*Institute of Hydrology, Wallingford, Oxon OX10 8BB, UK*

**Associate Editors:**  
A. A. Arin, Ankara, S. Baguelin, Sweden;  
J. Benoit, France; R. V. Viti, France;  
S. Chandra, India; M. H. Dik, Israel;  
L. W. Gellert, USA; J. R. Philip, France;  
V. Klemes, Canada; G. Klemes, Hungary;  
D. A. Klemes, Australia; V. Klemes, USSR;  
D. B. McWhorter, USA; D. R. Maidment, New Zealand;  
D. A. Maidment, New Zealand; J. P. Oudin, UK;  
S. Poku, New Zealand; D. H. Poff, Australia;  
A. J. Rind, New Zealand; J. A. Scholze, FR Germany;  
M. E. Thompson, Canada; E. Todini, Italy;  
A. van der Beken, Belgium; D. E. Walling, UK;  
D. A. Woodhead, USA; E. D. Young, FR.

Published for the  
International Association of  
Hydrological Sciences  
Association Internationale des  
Sciences Hydrologiques  
by Blackwell Scientific Publications

[www.iahs.info](http://www.iahs.info) Free membership

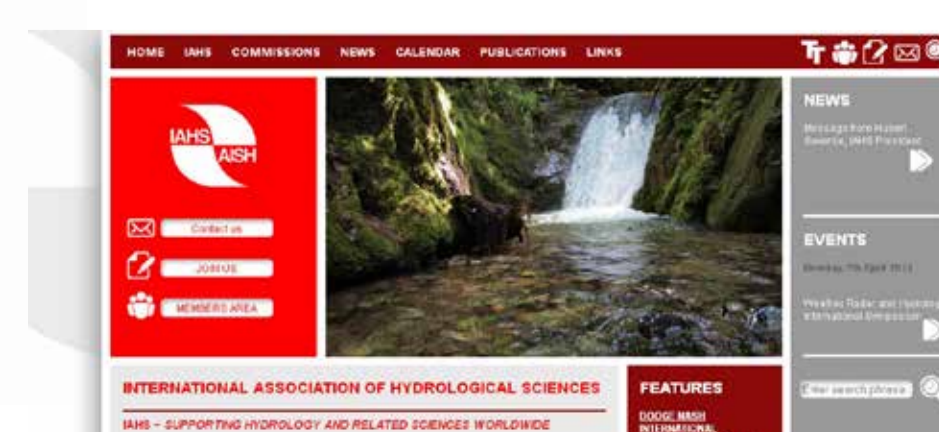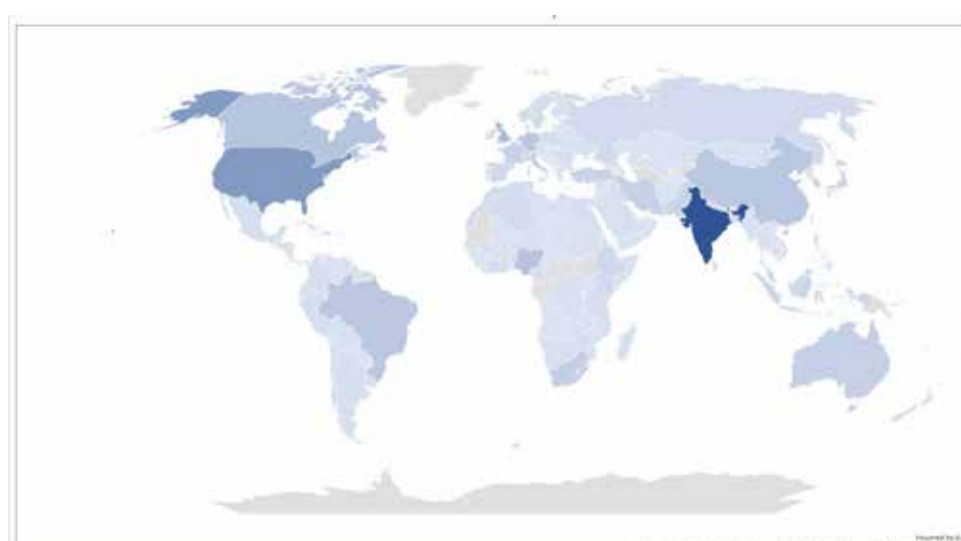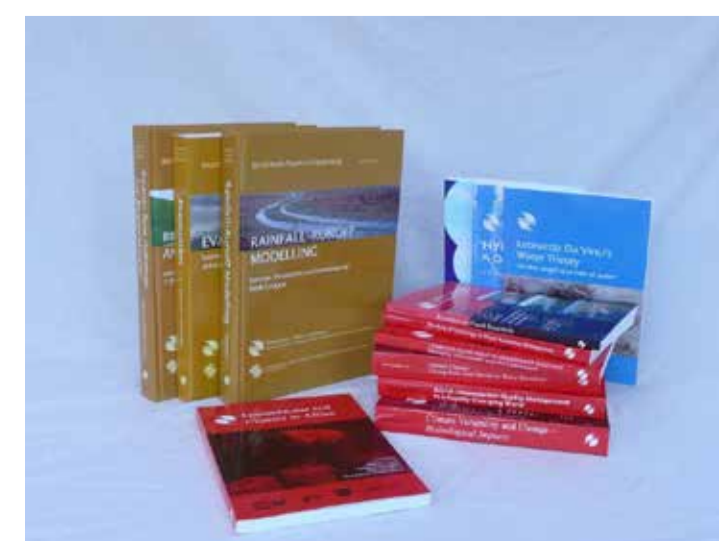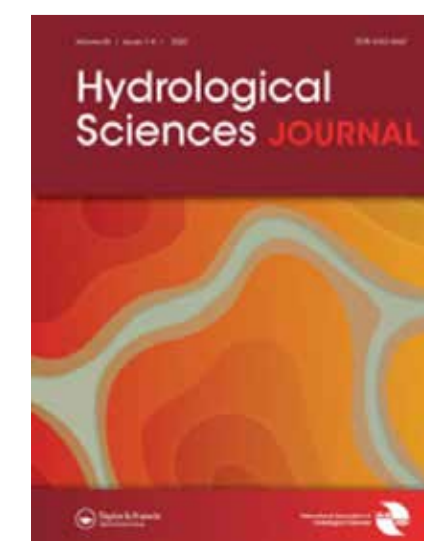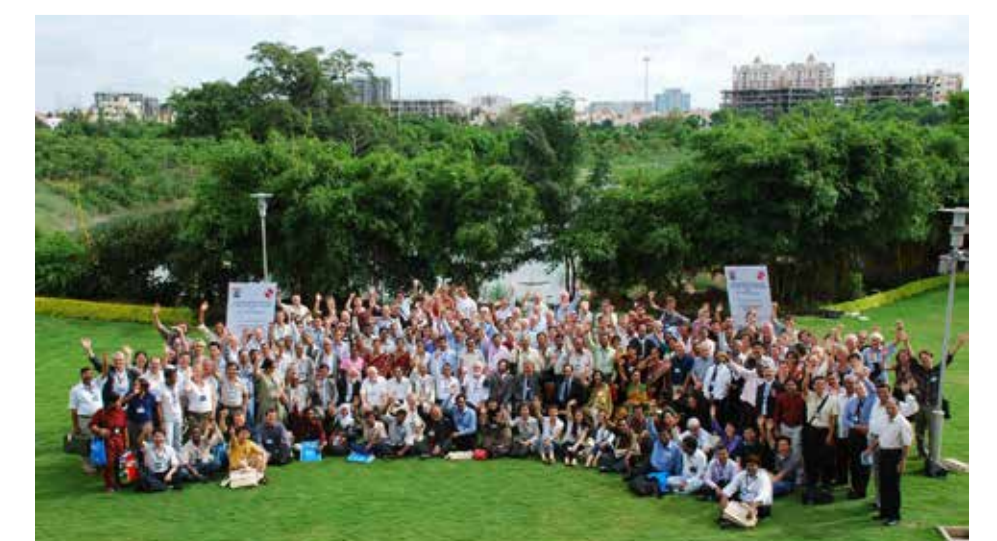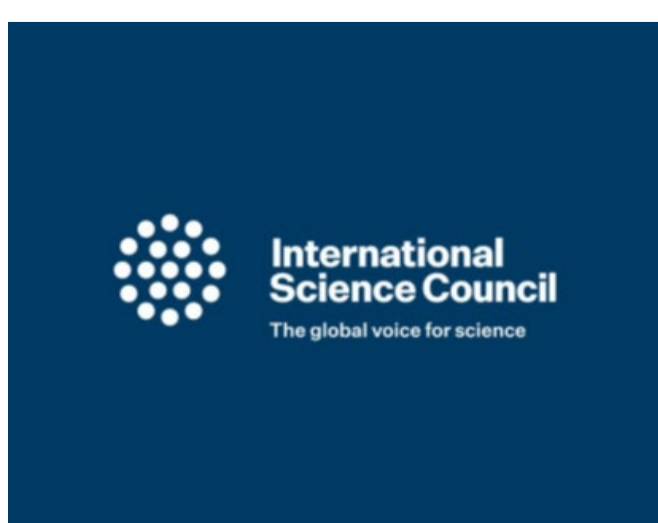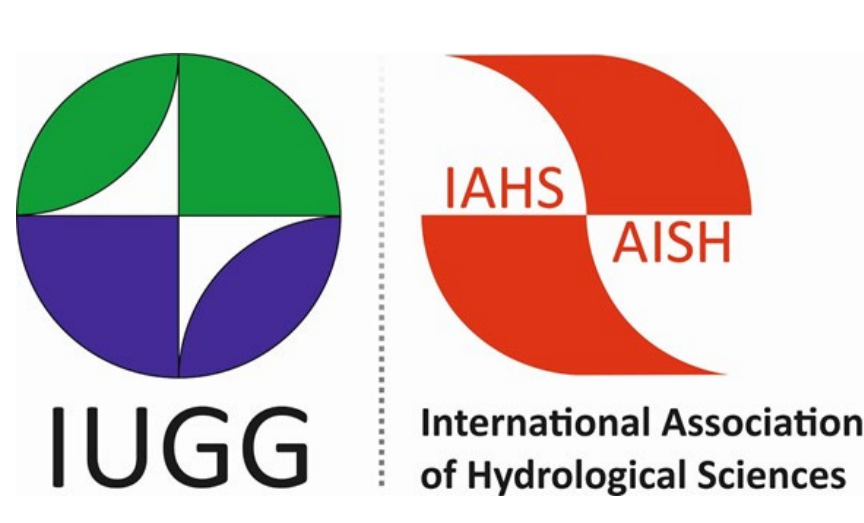

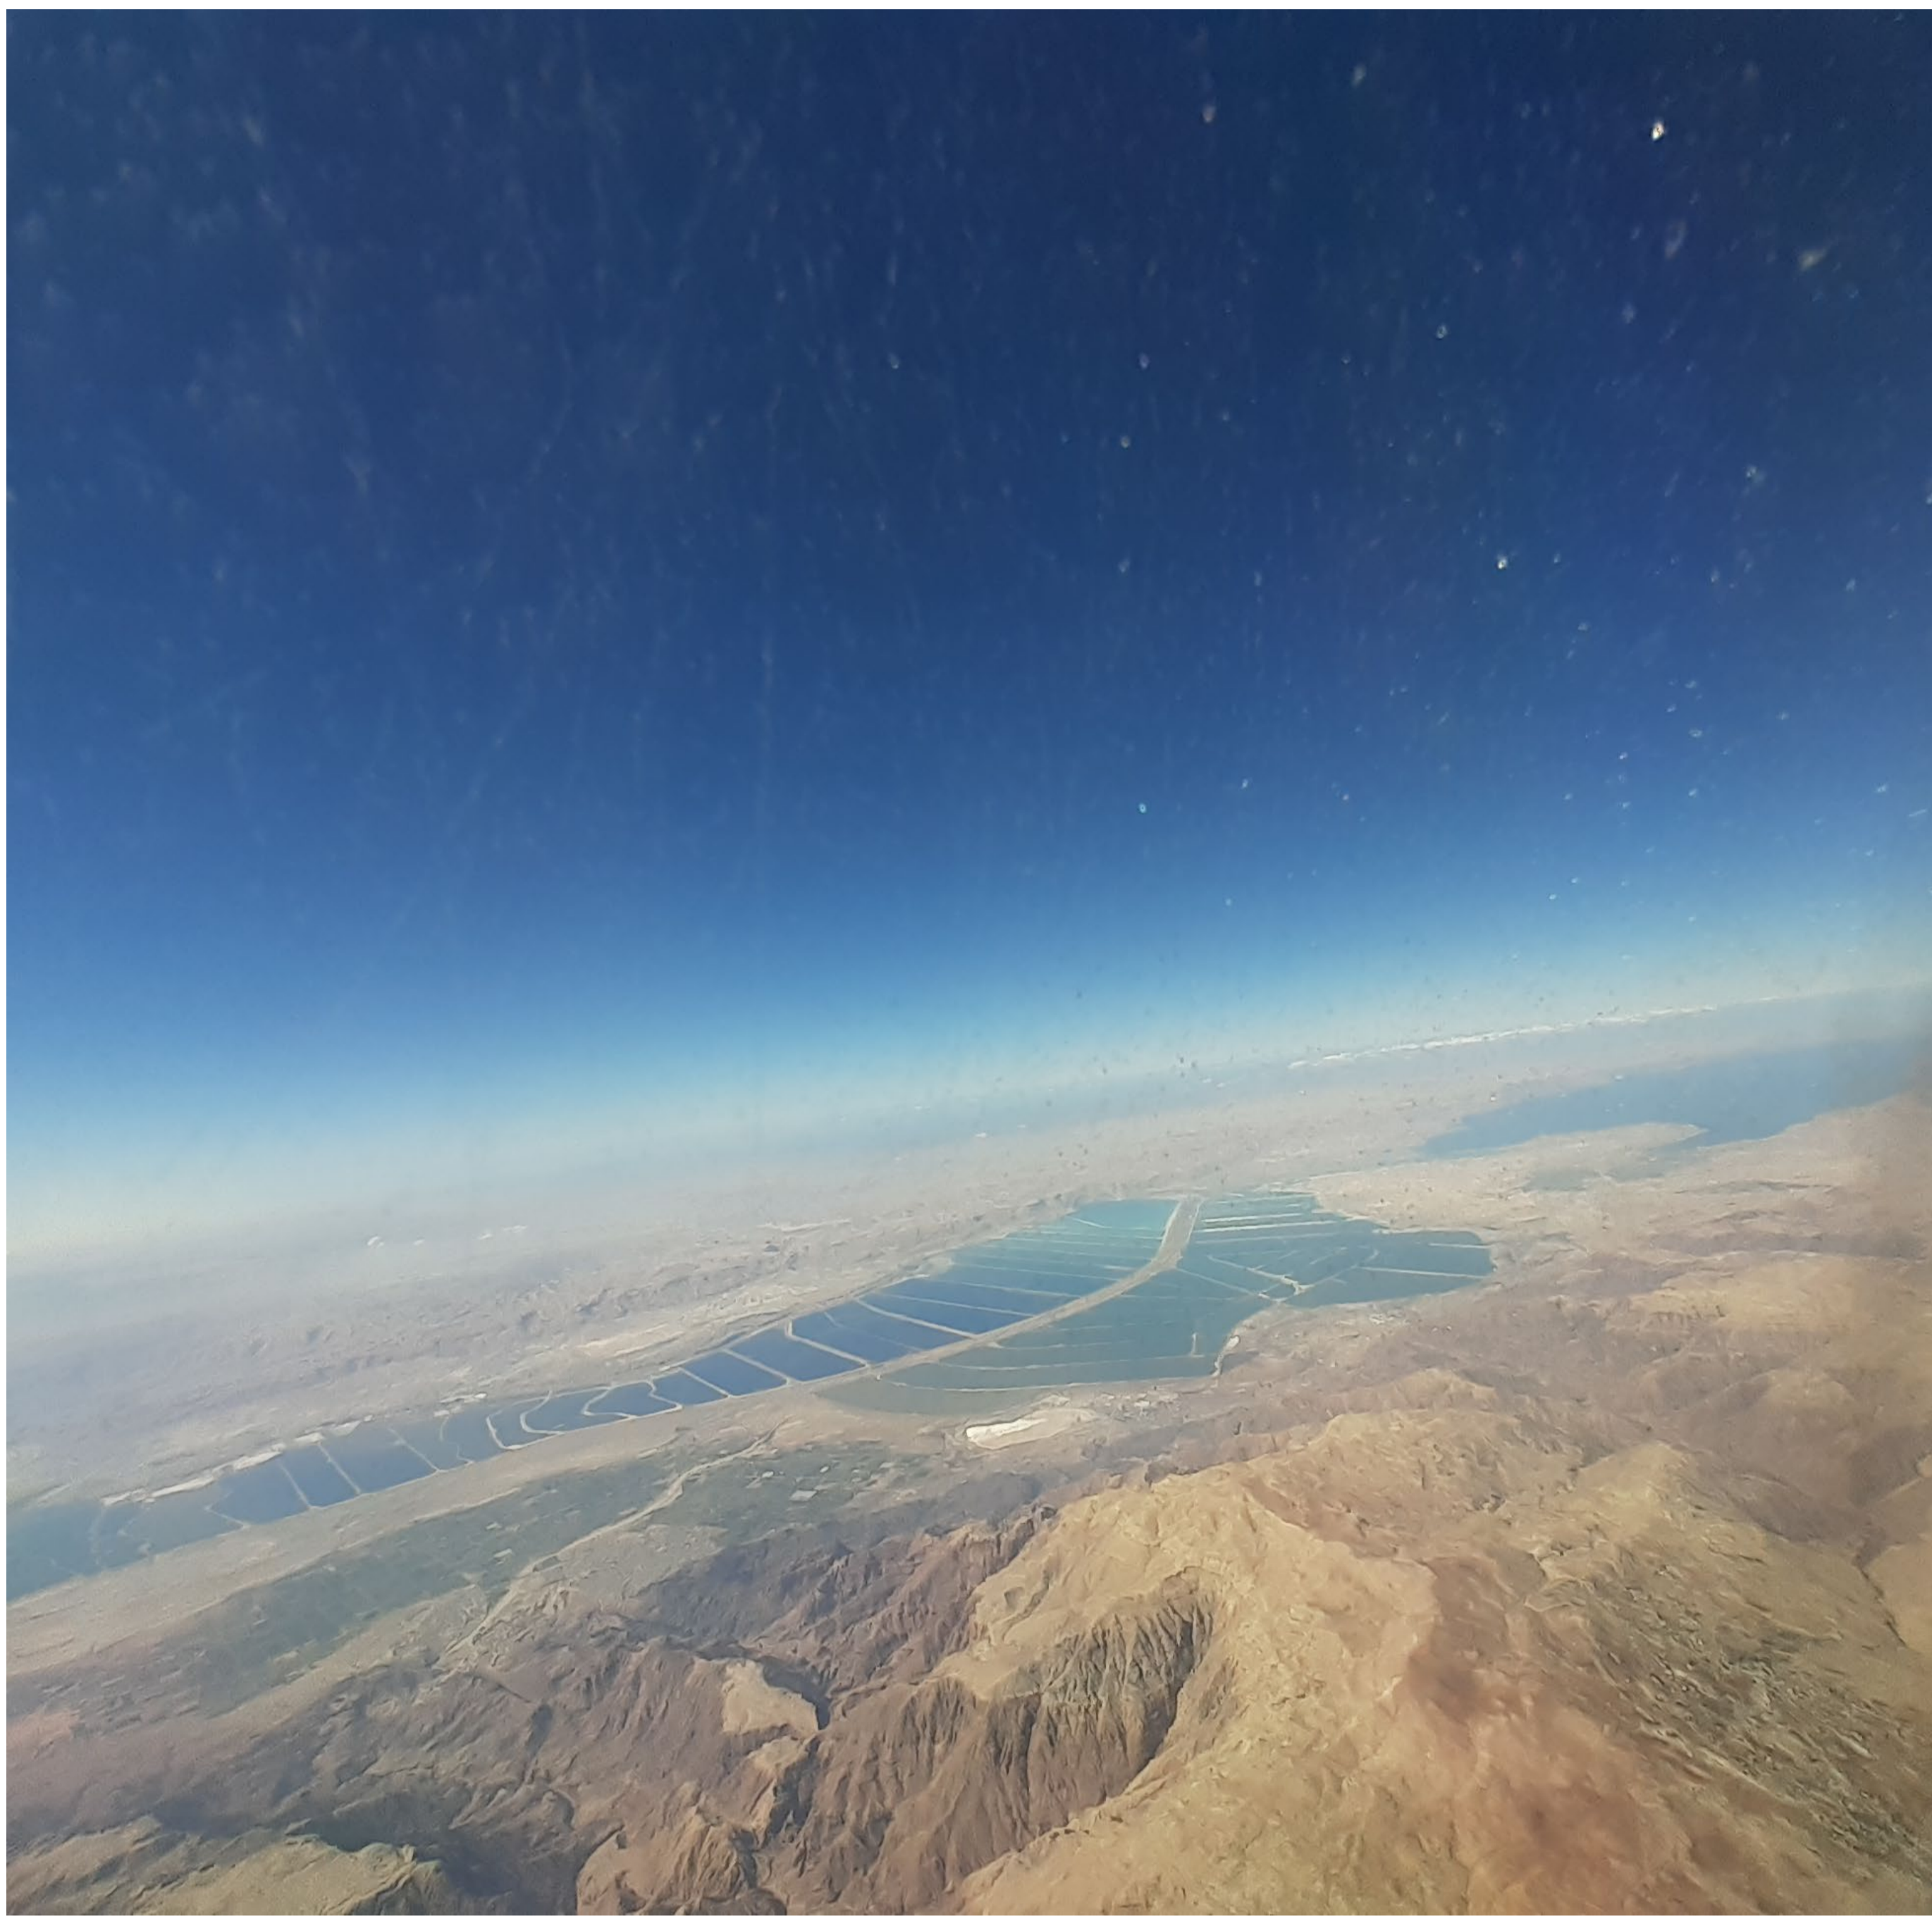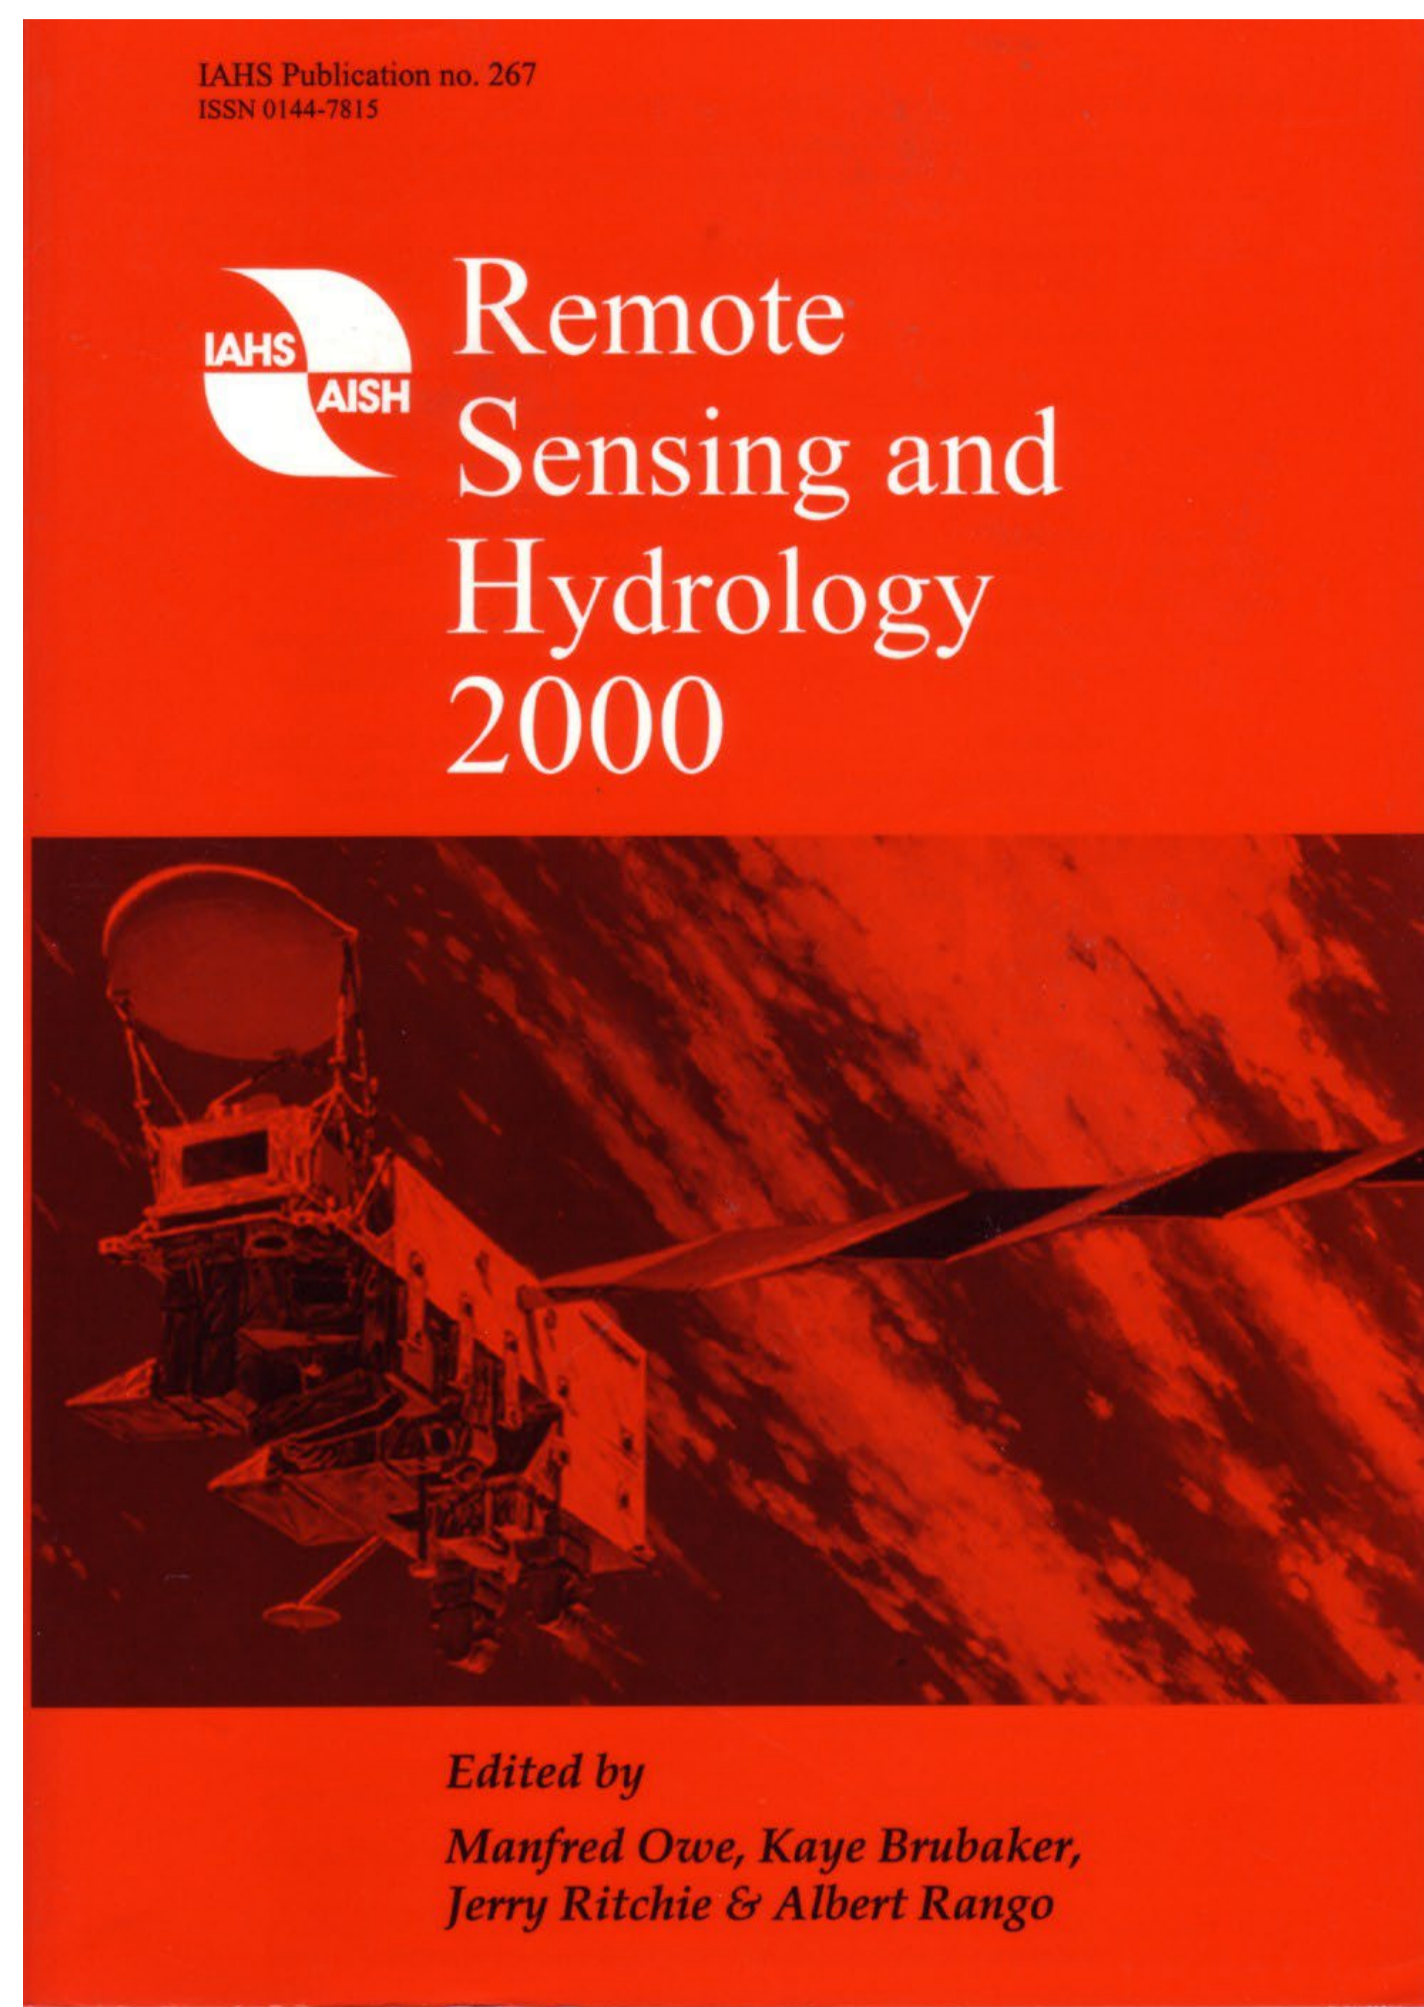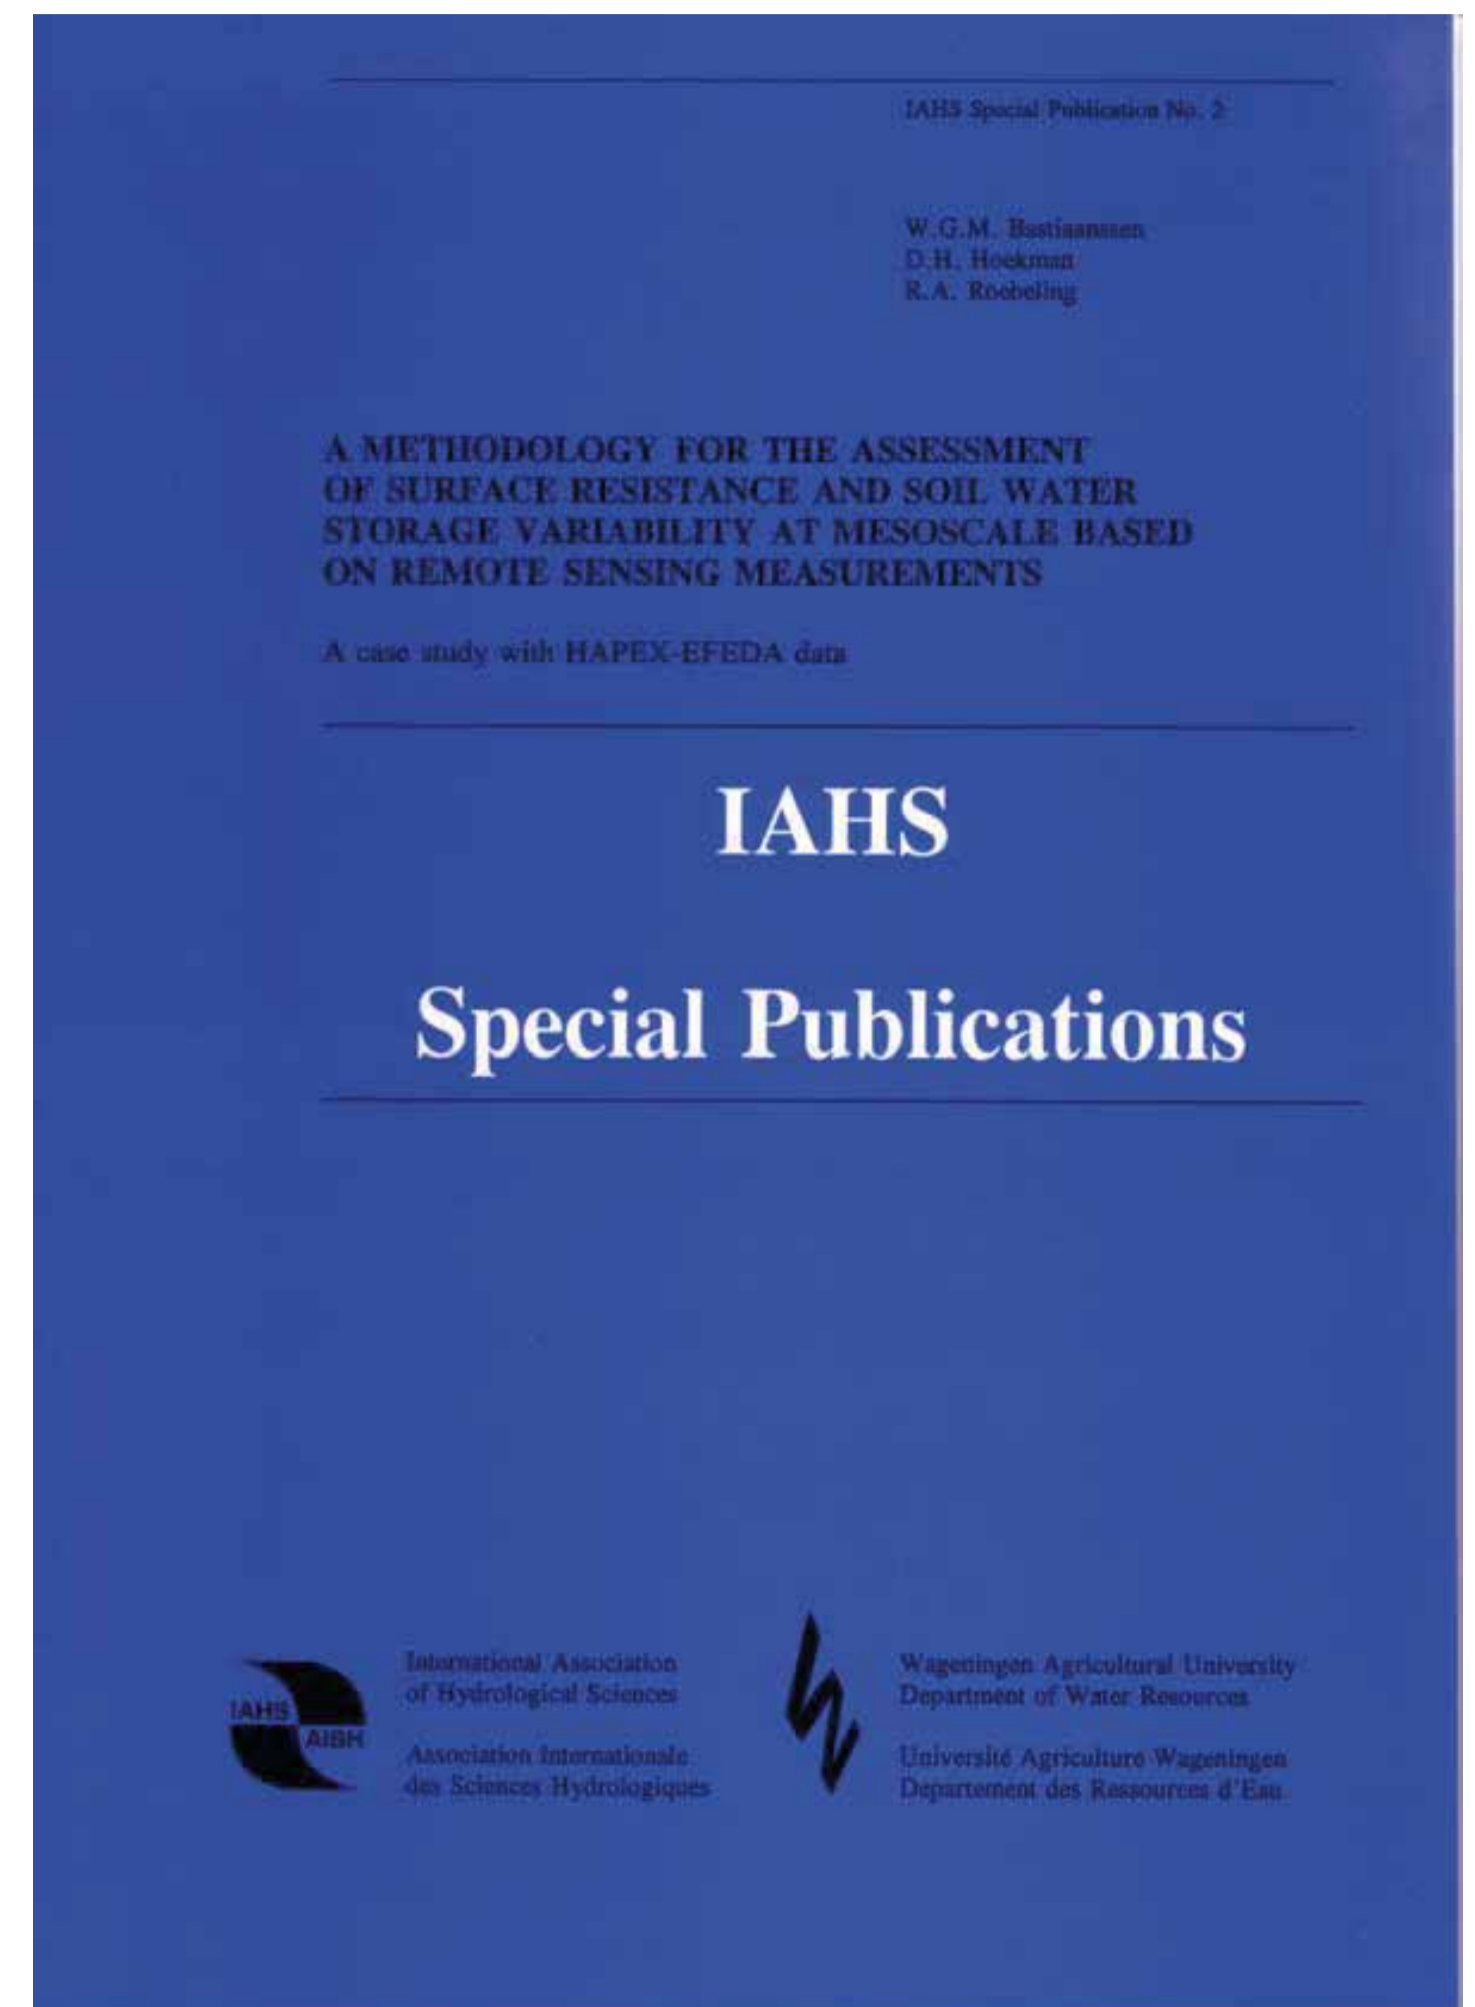

**Quantifying trends in system sustainability**  
DANIEL P. LOUCKS  
Civil and Environmental Engineering, Cornell University, Ithaca, New York 14853, USA

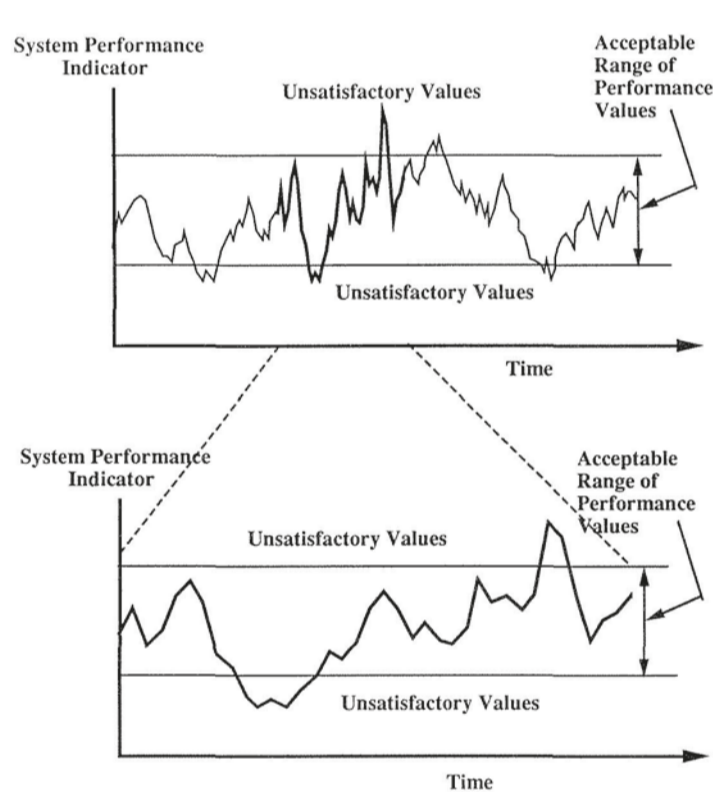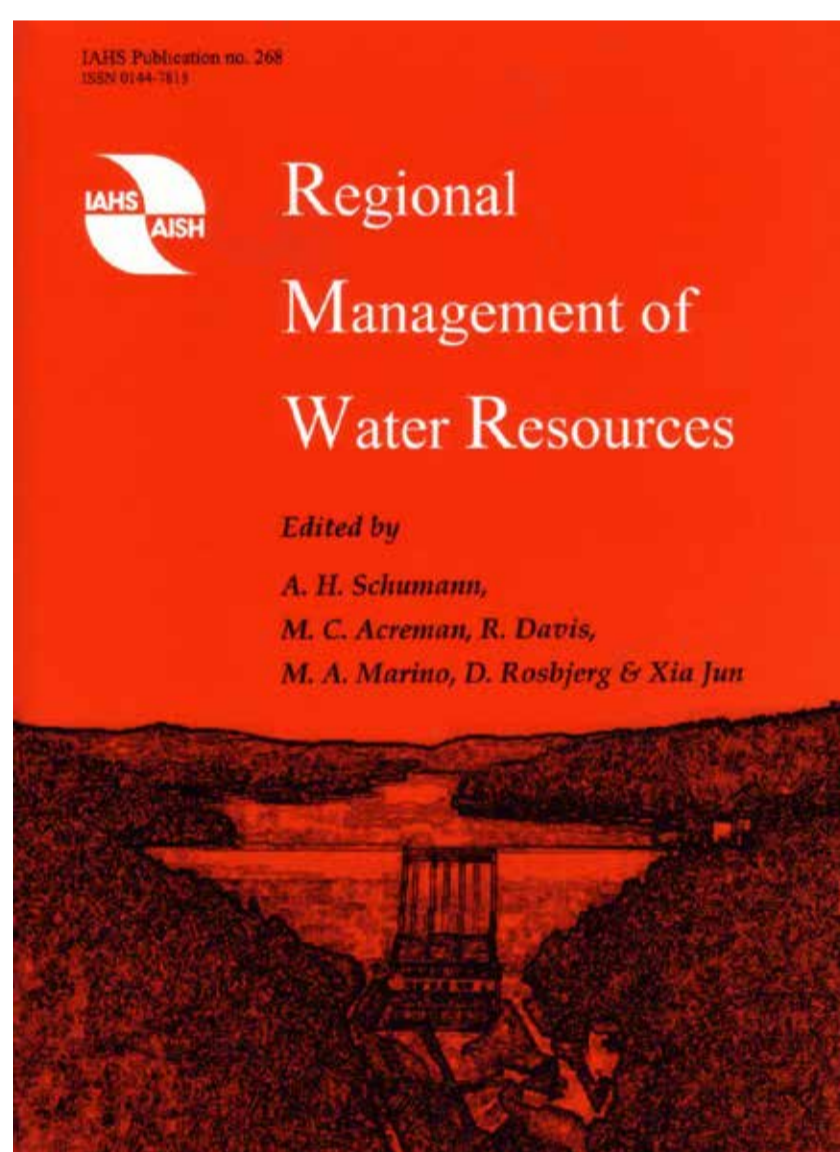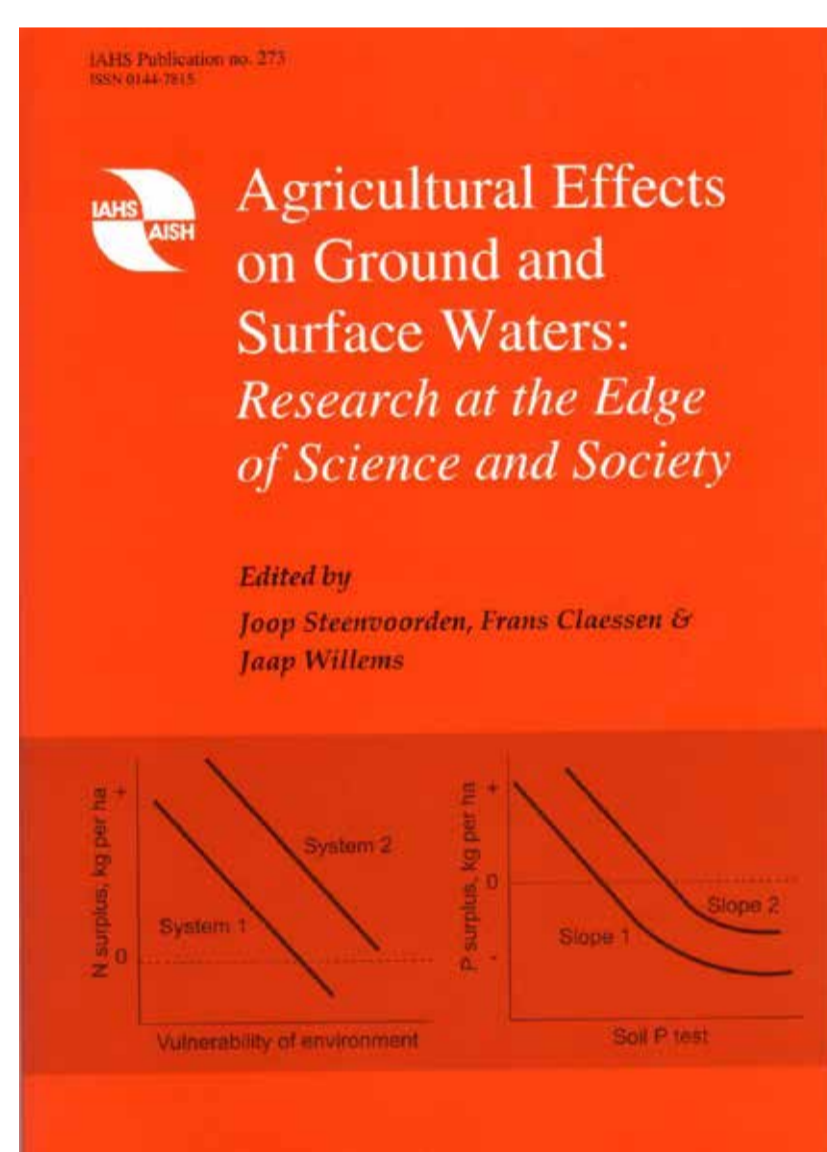

**Soil moisture variability: a comparison between detailed field measurements and remote sensing measurement techniques**  
PETER J. VAN OEELEN  
Department of Water Resources, Wageningen Agricultural University, Steene Kanaal 11, 6700 PA Wageningen, The Netherlands  
e-mail: Peter.vanOoelen@wur.nl

**Application of remote sensing methods to hydrology and water resources\***  
A. RANGO  
USDA Hydrology Laboratory, Agricultural Research Service, Beltsville, Maryland 20705, USA

**Operational applications of remote sensing in hydrology: success, prospects and problems\***

ALBERT RANGO  
USDA Hydrology Laboratory, Agricultural Research Service, Building 007, Room 104, Beltsville, Maryland 20705, USA  
e-mail: alrango@hydrolab.arsusda.gov  
AHILAM I. SHALABY  
Department of Civil Engineering, Howard University, 2300 Sixth Street NW, Washington DC 20009, USA

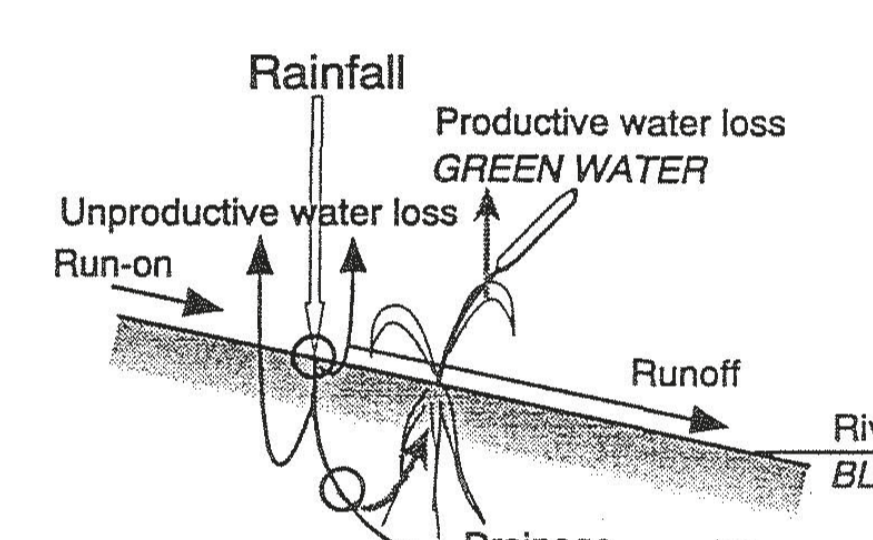

**Gravity and the hydrosphere: new frontier**

JEAN O. DICKEY<sup>1</sup>, CHARLES R. BENTLEY<sup>1</sup>, ROGER BILHAM<sup>1</sup>, JAMES A. CARTON<sup>1</sup>, RICHARD J. EANES<sup>1</sup>, THOMAS A. HERRING<sup>1</sup>, WILLIAM M. KAUL<sup>1</sup>, GARY S. E. LAGERLOEF<sup>1</sup>, STUART ROISTACZER<sup>1</sup>, WALTER H. F. SMITH<sup>1</sup>, HUGO M. VAN DEN DOOL<sup>1</sup>, JOHN M. WAHR<sup>2</sup>, MARIA T. ZUBER<sup>1</sup>  
<sup>1</sup>Member of the US National Research Council/National Academy of Science Committee on Earth Gravity from Space

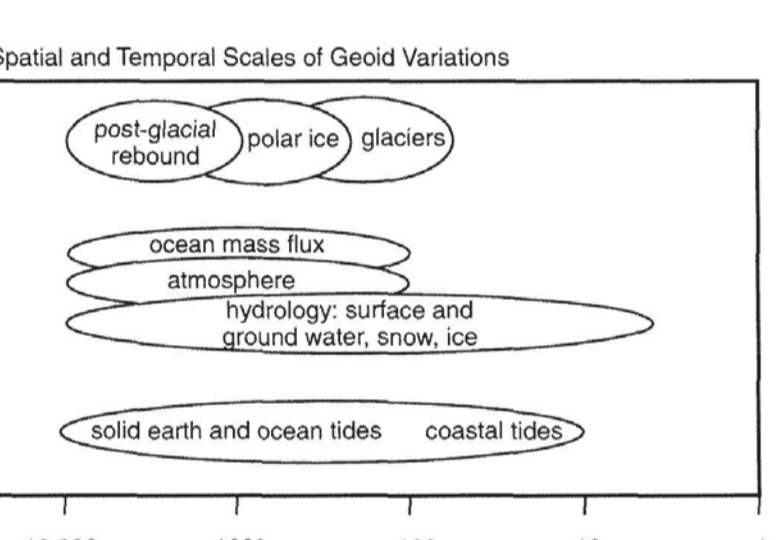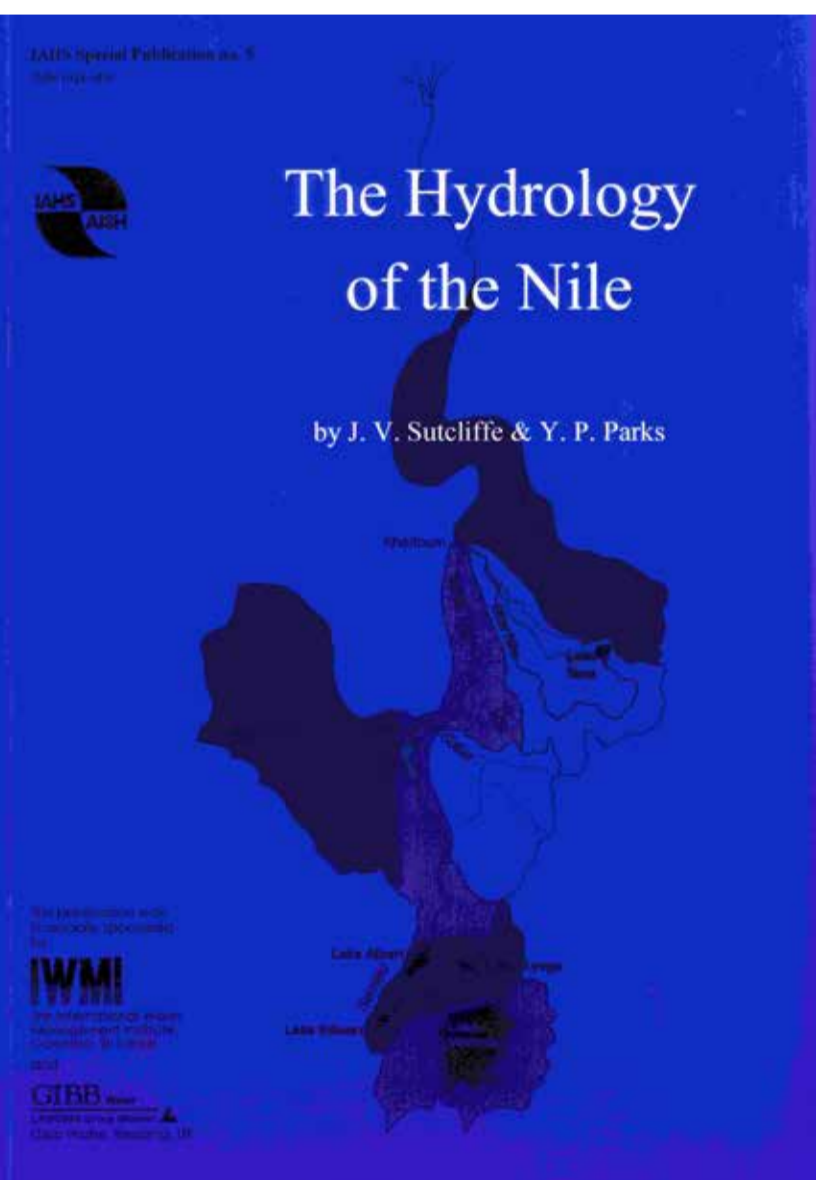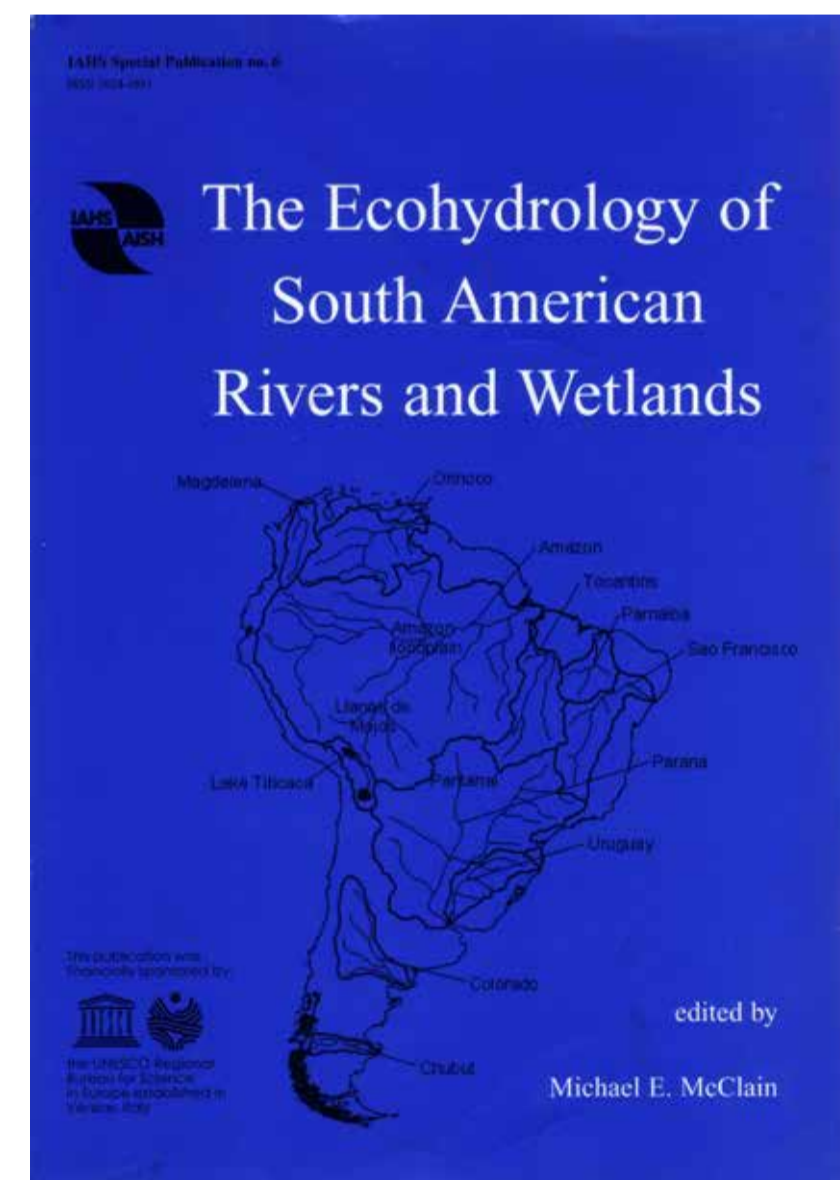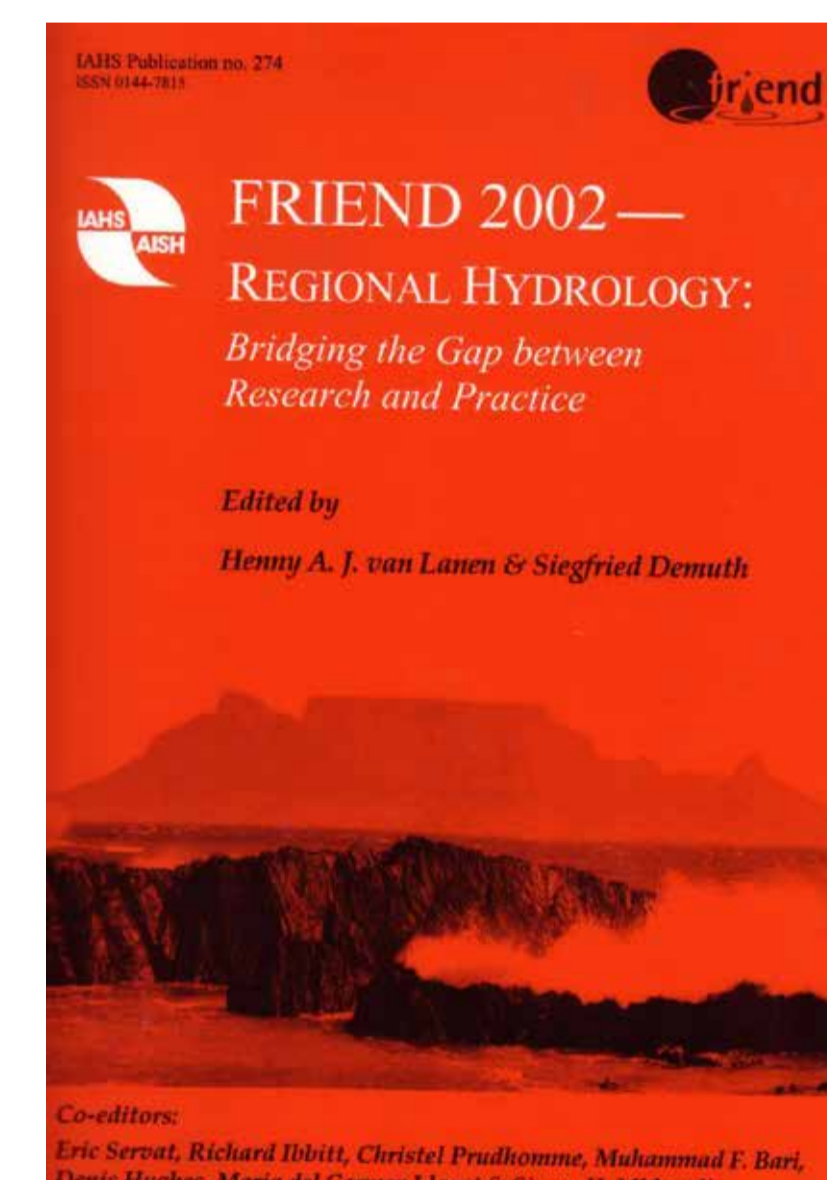

**Towards a world hydrological cycle observing system**

JOHN C. RODDA, SERGE A. PIEVNS & NAGINDER S. SEHMI  
WMO, CP 2300, 1211 Geneva, Switzerland  
GEOFFREY MATTHEWS  
World Bank, 1818 H Street NW, Washington, DC 20433, USA

**Abstract** There are considerable difficulties in assembling global hydrological data sets in near real time, data that might be used for deciding investment for sustainable water resources development and management, for environmental protection and for studying global change. Several reasons exist for these difficulties, a new one is that many countries have recently been cutting back on hydrological networks and the services that operate them. This means that knowledge of the World's water resources is getting worse when the global demand for water is accelerating. By way of contrast, meteorologists have ready access to large volumes of global data, much of it in real time, principally through WMO's World Weather Watch (WWW). A World Hydrological Cycle Observing System (WHYCOS) is proposed to facilitate access to global data and support hydrological services in need. A world-wide network of about 1000 stations is planned for the largest rivers, together with associated data bases and products to meet the needs of users. WHYCOS would start in Africa with a 100-station network and be expanded to other regions. It is a necessary tool for averting the coming water crisis and essential to the drive towards sustainable development.

**Un système mondial d'observation du cycle hydrologique**  
**Résumé** Il est extrêmement difficile de pouvoir associer en temps réel des séries de données hydrologiques à l'échelle globale, données qui pourraient être utilisées pour décider des investissements pour le développement et la gestion des ressources en eau sur un base durable, pour la protection de l'environnement et l'étude du changement climatique à l'échelle mondiale. Plusieurs raisons existent pour expliquer ces difficultés, mais le fait le plus important est que beaucoup de pays ont récemment pratiqué des coupes profondes dans les réseaux hydrologiques et les services qui en ont la charge en est une nouvelle. Cela signifie que la connaissance des ressources en eau du globe décroît au moment où la demande en eau augmente dans tous les pays. Par contraste, météorologues et climatologues ont un accès aisé à un grand nombre de données mondiales, en temps réel pour beaucoup d'entre-elles, principalement grâce à la Veille Météorologique Mondiale (VMM) de l'OMM. On propose un Système Mondial d'Observation du Cycle Hydrologique (SMOCH) afin de faciliter d'accès aux données mondiales et d'aider les services hydrologiques qui le désirent. Un réseau mondial d'environ 1000 stations est prévu pour les cours d'eau les plus importants avec des banques de données associées et des produits adaptés aux besoins des utilisateurs. Le SMOCH sera tout d'abord mis en place en Afrique, avec un réseau d'une centaine de stations, puis étendu à d'autres régions du monde. C'est un outil nécessaire pour prévenir la crise montante des

Open for discussion until 1 April 1994

**Water resources research: trends and needs in 1997\***

SCIENTIFIC COMMITTEE ON WATER RESEARCH (SCOWAR)\*

of the International Council of Scientific Unions (ICSU)

**Abstract** The decade of the 1990s has seen an awakening understanding by the global community of the importance of freshwater for societal and environmental vitality. In 1994, the Scientific Committee on Water Research (SCOWAR) was established by the International Council for Scientific Unions (ICSU) to address frontier freshwater-related science issues. This paper is SCOWAR's review of current trends and burning needs in selected areas of water resources research. The key future concerns to be served by the results of the research brought under review by SCOWAR are identified as equitable sharing of water resources and demand management, soil moisture for agriculture, water and health, ecological consequences of hydrological change, and improving data collection and assessment. SCOWAR also perceives immediate intellectual challenges in a number of other areas, such as, inter alia, multiple-scale problems, sustainability of reservoirs, dynamics of freshwater ecosystems. There is a general recognition that unavailability of water in sufficient quality and quantity has been and will continue to be an increasingly important constraint on socio-economic development. But the situation is not the same all over the world. SCOWAR is concerned that much of the increased pressure occurs and will occur in particular in Sub-Saharan Africa where high population growth and the desire to improve living standards expand water requirements.

**Orientations et besoins de recherche en 1997 dans le secteur des ressources en eau**  
**Résumé** La décennie des années 1990 s'est caractérisée par une prise de conscience croissante dans la communauté scientifique de l'importance des eaux douces pour le développement de notre société et de son environnement. Le Comité Scientifique pour la Recherche dans le domaine de l'Eau (SCOWAR) a été mis en place en 1994 par le Conseil International des Unions Scientifiques (ICSU) dans le but d'identifier les questions scientifiques de pointe qui se posent dans le secteur des eaux continentales. Cet article se présente un bilan des orientations et des besoins dans certains secteurs sélectionnés de recherche sur les ressources en eau. Les secteurs essentiels qui devraient dans le futur bénéficier des orientations de recherche sont les suivants: partage équitable des ressources en eau et gestion de la demande; eau du sol et agriculture; eau et santé; conséquences écologiques des changements hydrologiques; amélioration des banques de données et des possibilités de prévision. Le SCOWAR perçoit des défis intellectuels immédiats dans de nombreux domaines, tel que par exemple: les problèmes d'échelles multiples, la durabilité des réservoirs,

\* This paper, prepared by SCOWAR, served as the basis for the Scientific Lecture, "Some aspects of water research trends and needs in the late 1990s: thinking about the future" presented by Janusz Kinder, Chairman of SCOWAR, in celebration of the 75th Anniversary of IAHS at the Opening Ceremony of the IAHS 5th Scientific Assembly, Rabat, Morocco, 22 April 1997.  
\* Abdel Aloudi (Bosnia), Ramesh Bhatia (India), Alfred Becker (Germany), Sandy Cairncross (UK), Malin Falkenmark (Sweden), Janusz Kinder (Poland)—Chairman, Wolfgang Kienzbach (Switzerland), Robert J. Naiman (USA), Lekun Oyeboade (Nigeria), W. J. Shuttleworth (USA), Kuniohiko Takeuchi (Japan), George Vachaud (France), Jan A. Veldrop (USA), Adriaans Verwey (The Netherlands).

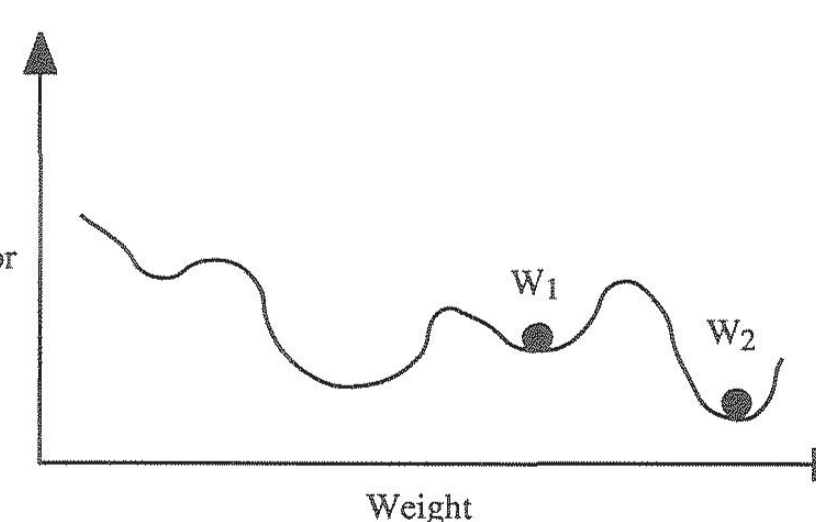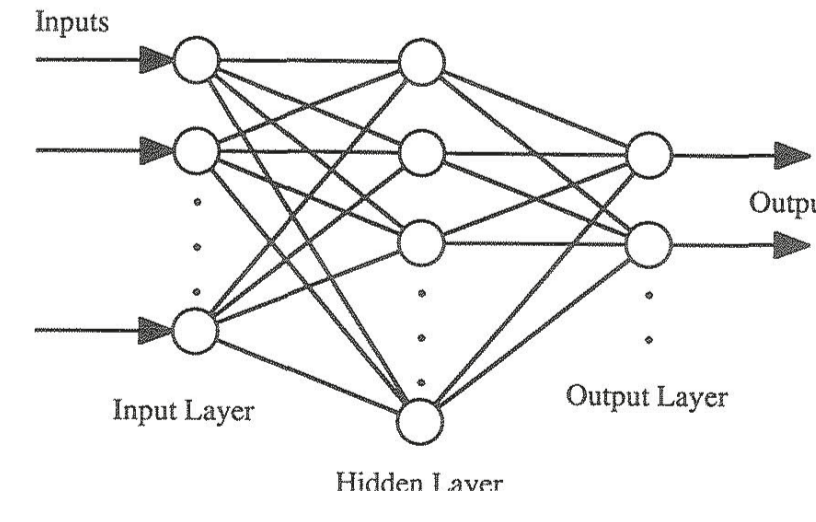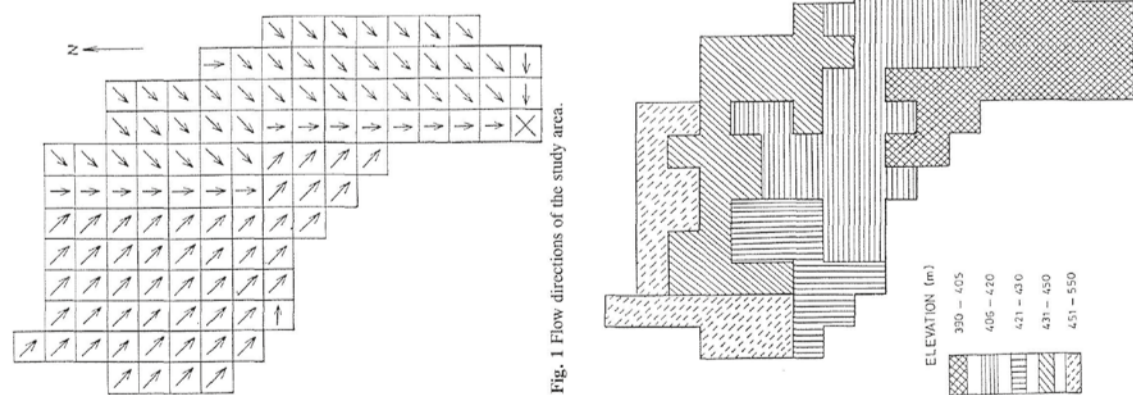

193

**Climate variability, hydrology and water resources: do we communicate in the field? (HAPEX, FIFE, GEWEX, GCIP and what next?)**

JAROMÍR NĚMEC  
Visiting Scientist, Hydrology Section, Department of Geography, Geographisches Institut ETH, Zurich, Switzerland

Hydrological Sciences—Journal des Sciences Hydrologiques, 42(4), August 1997

**Society's interaction with the water cycle: a conceptual framework for a more holistic approach**  
J. A. JONES  
Institute of Geography and Earth Sciences, University of Wales, Aberystwyth, SY23 3DA, UK  
e-mail: jay@aber.ac.uk

M. FALKENMARK  
Natural Science Research Council, Box 7142, S-103 87 Stockholm, Sweden

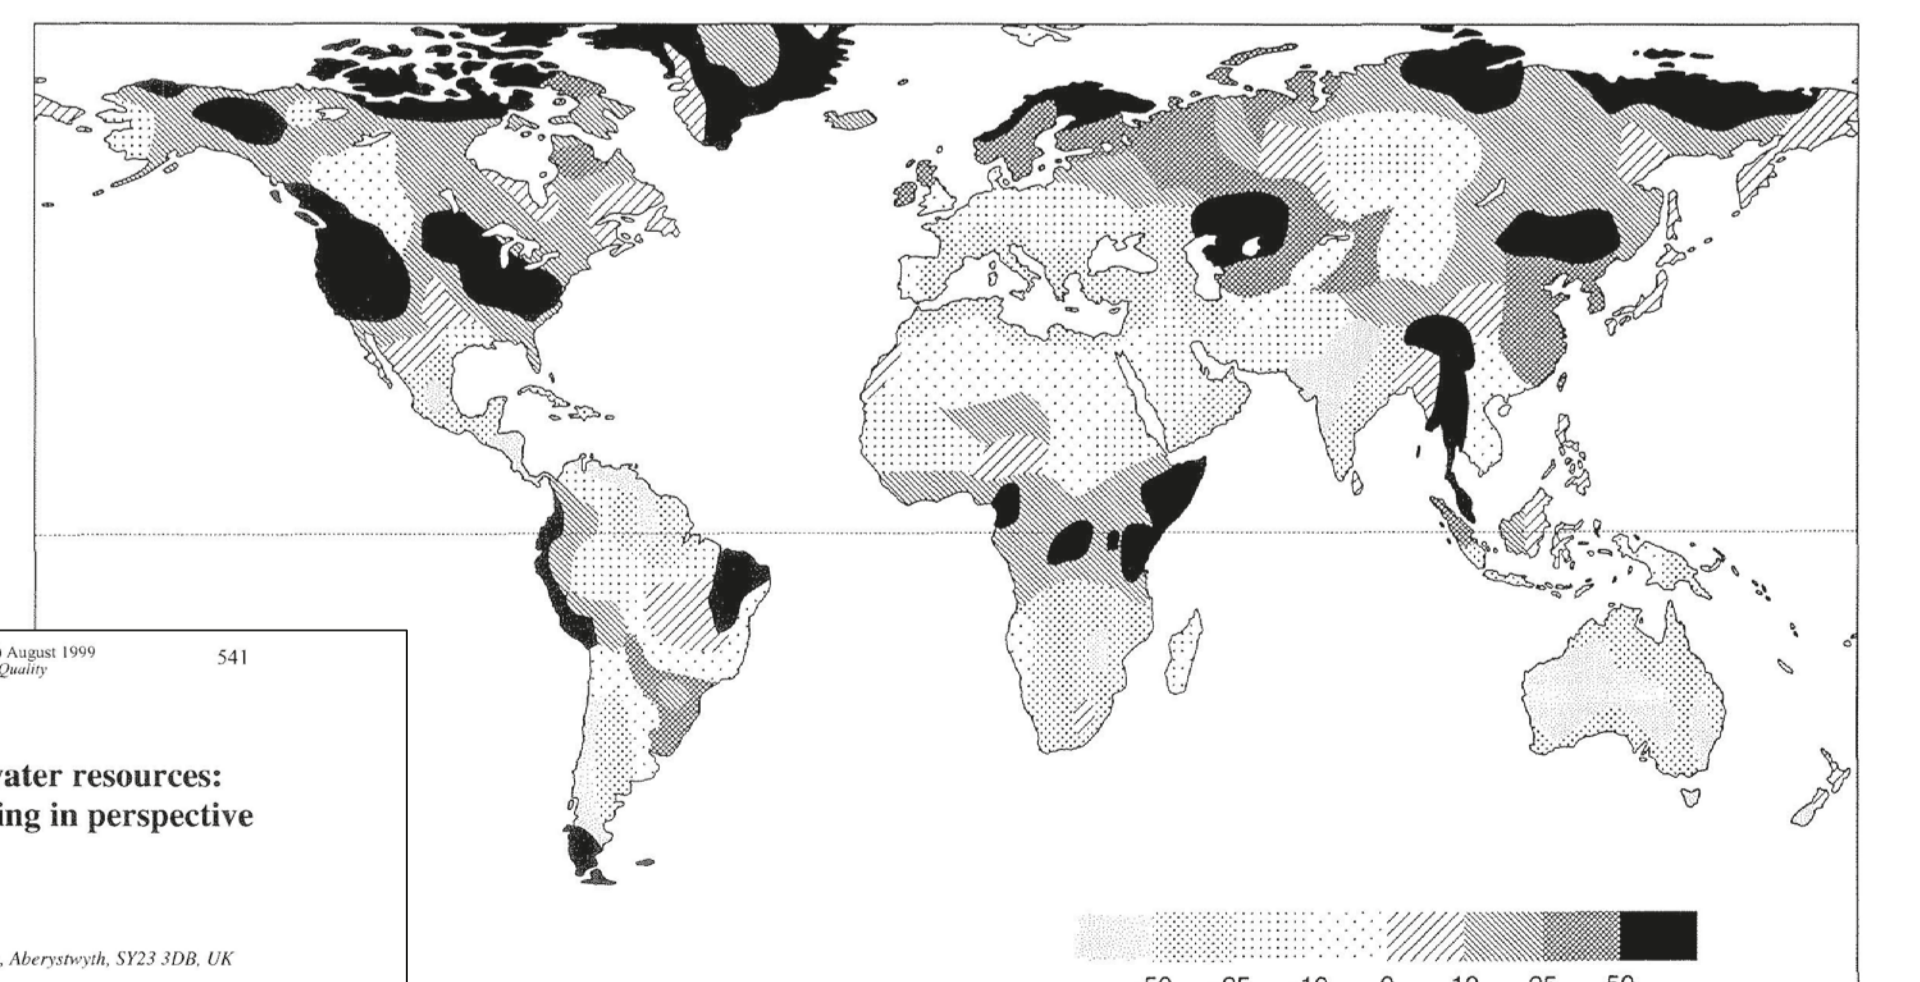

Fig. 1 Percentage change in mean annual runoff by the 2080s, as calculated by Arnell & King (1997) from the Hadley Centre high resolution AOGCM with greenhouse gases only (HadCM2GRC output). Redrawn with kind permission from the authors.

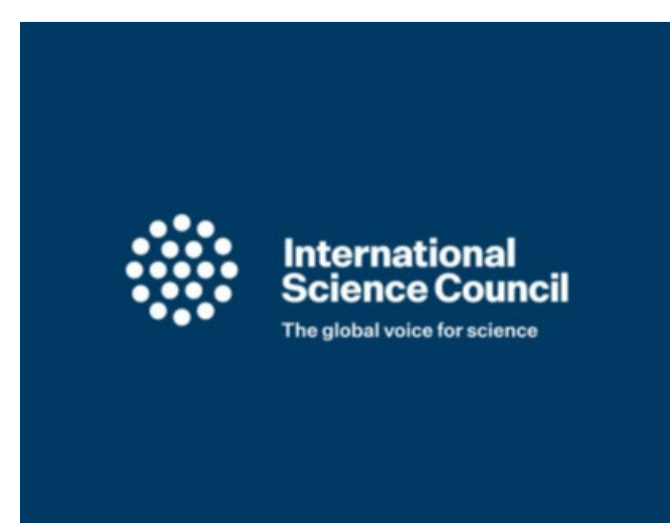

www.iahs.info Free membership

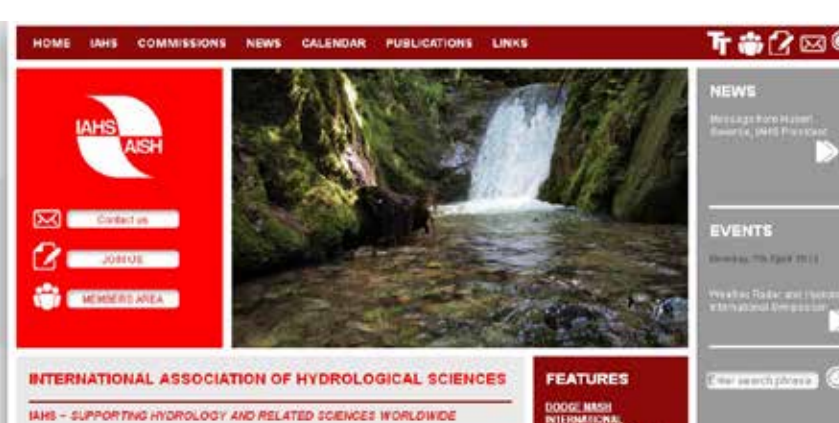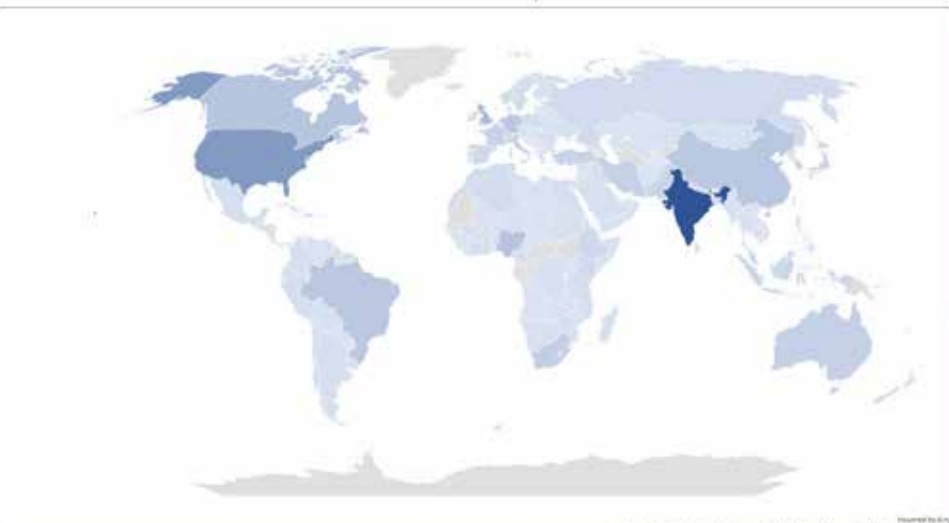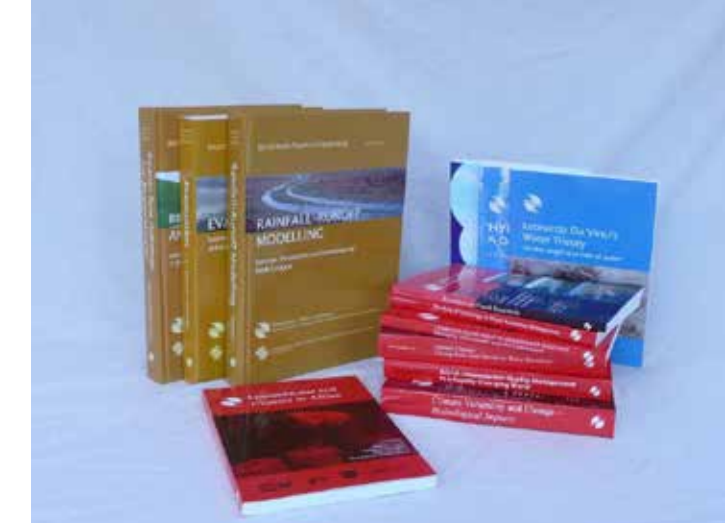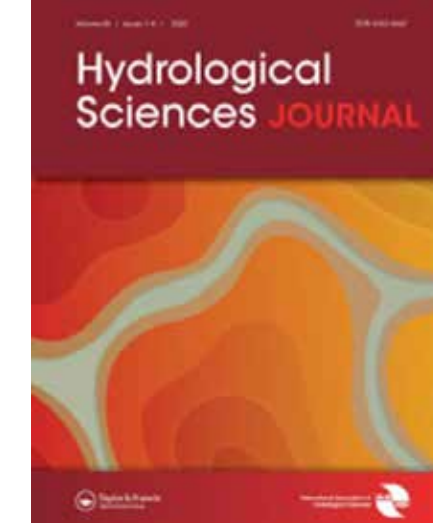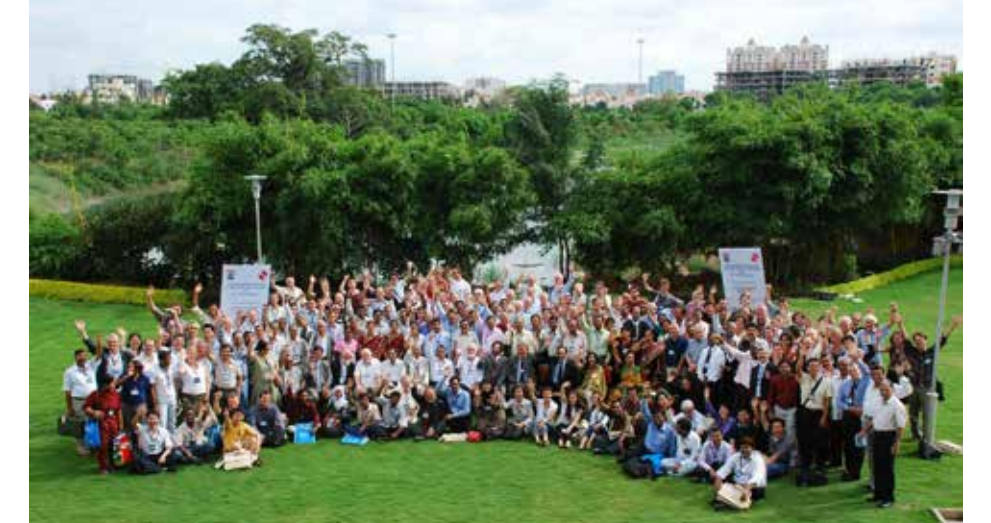

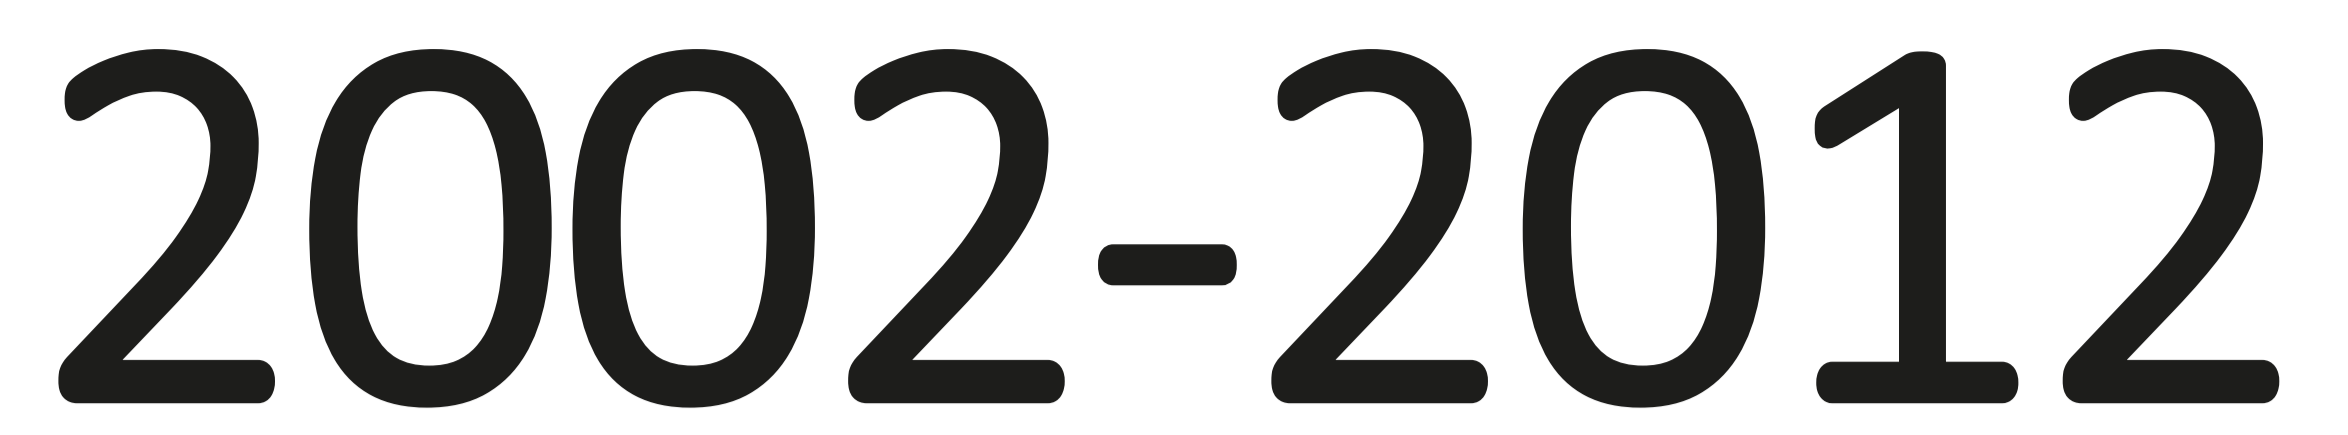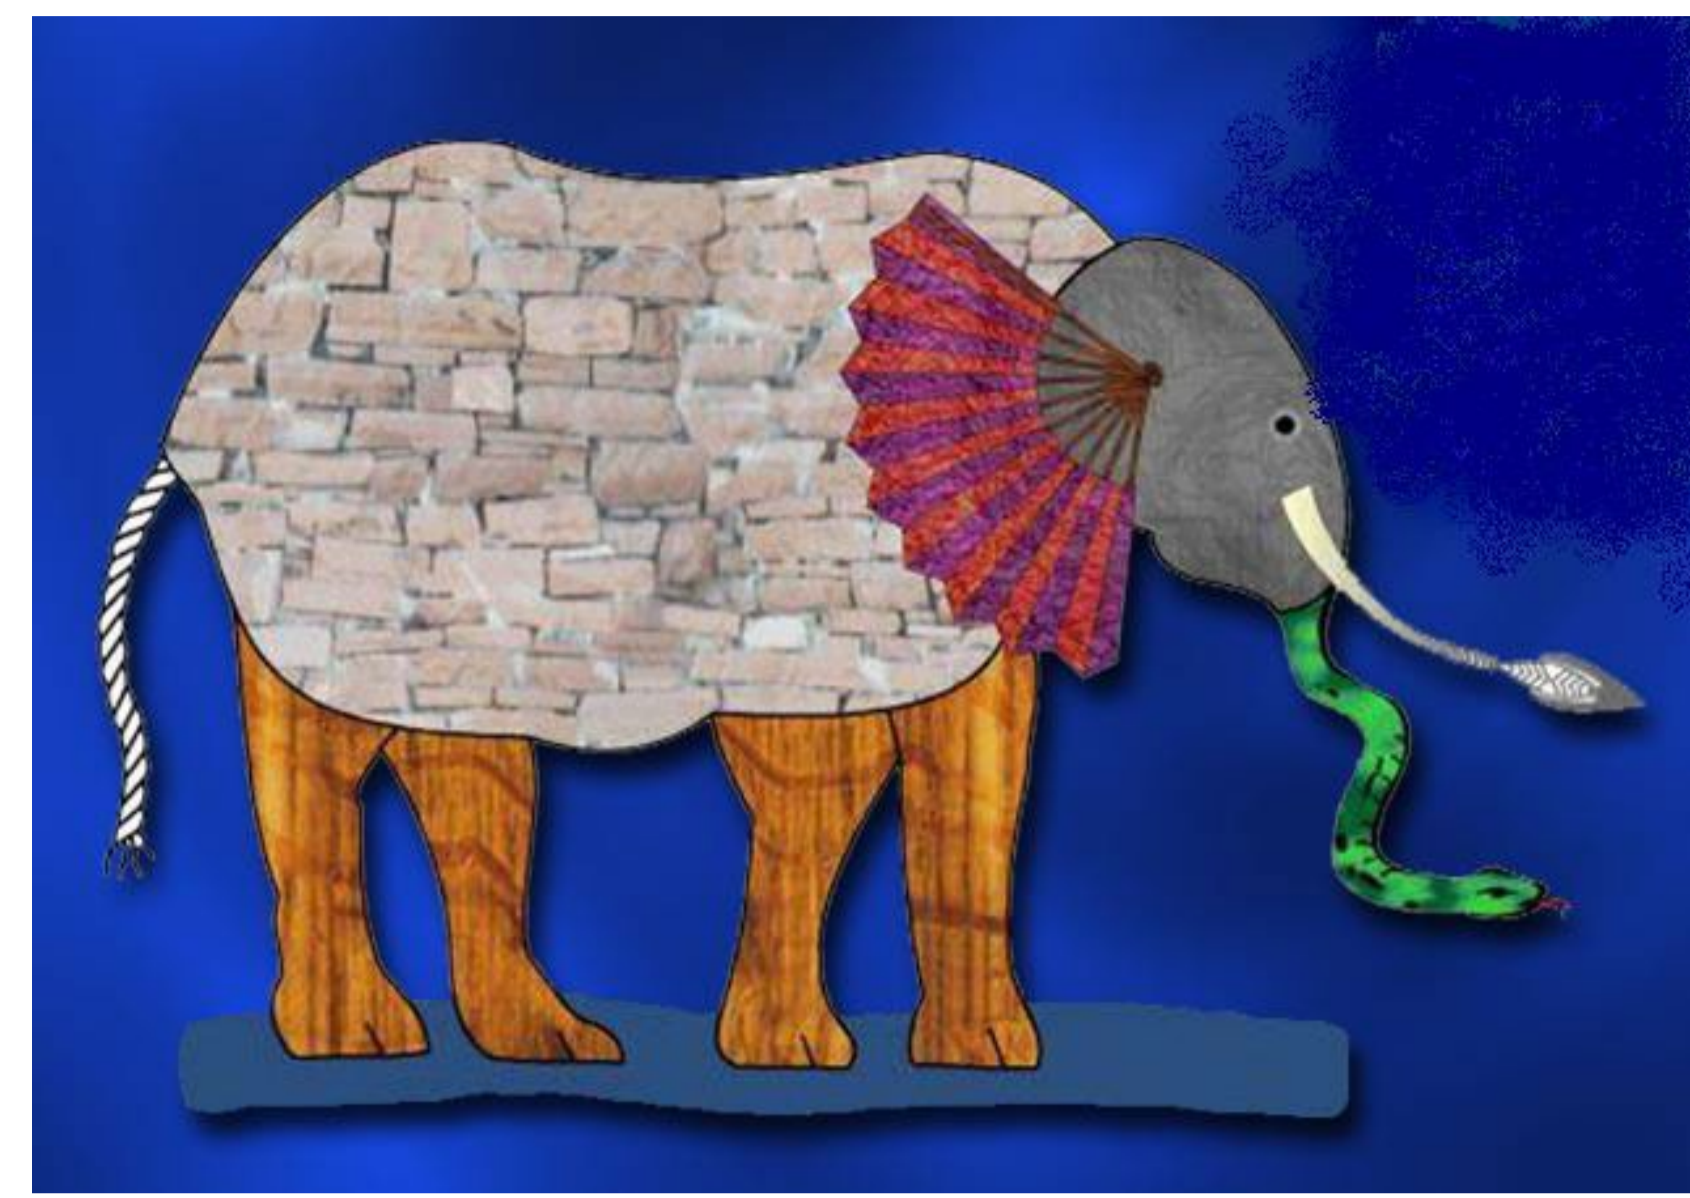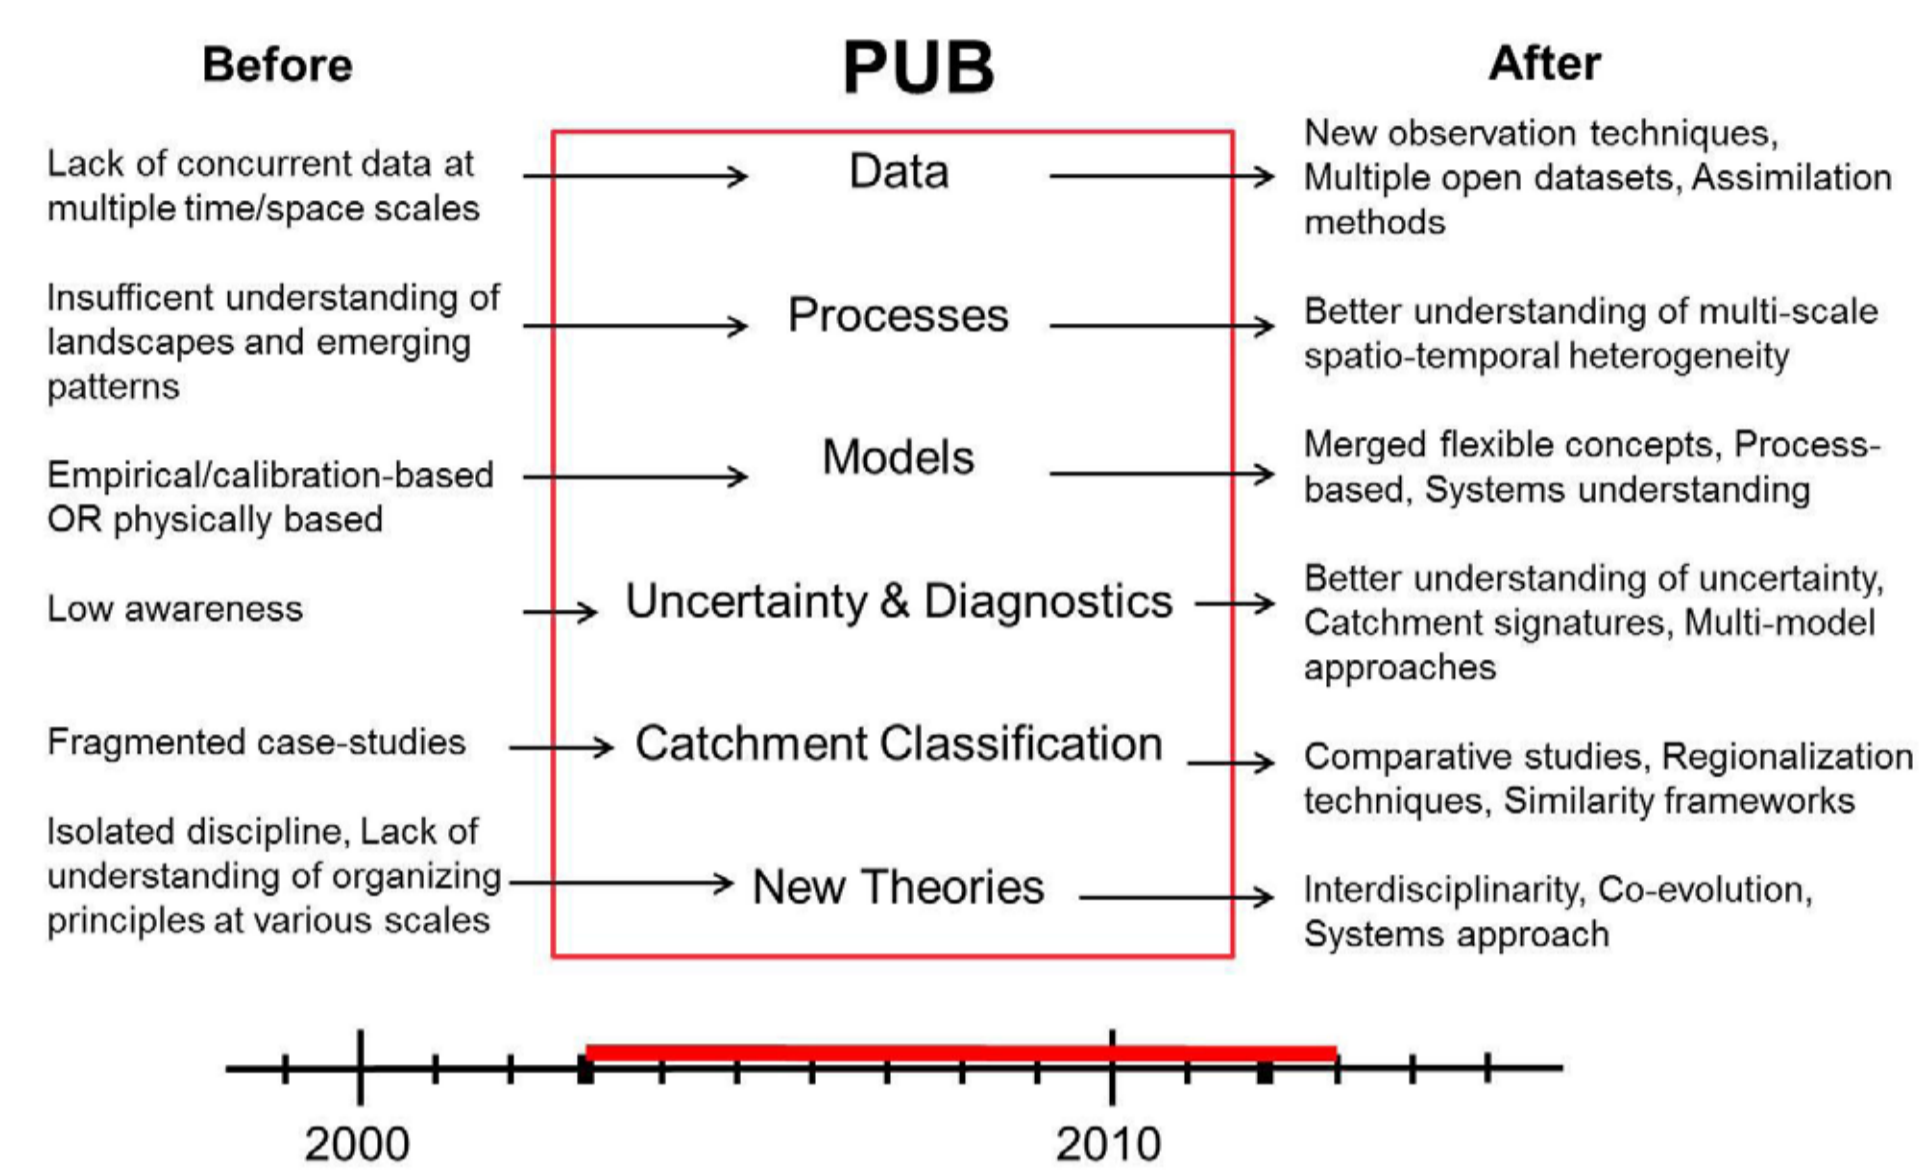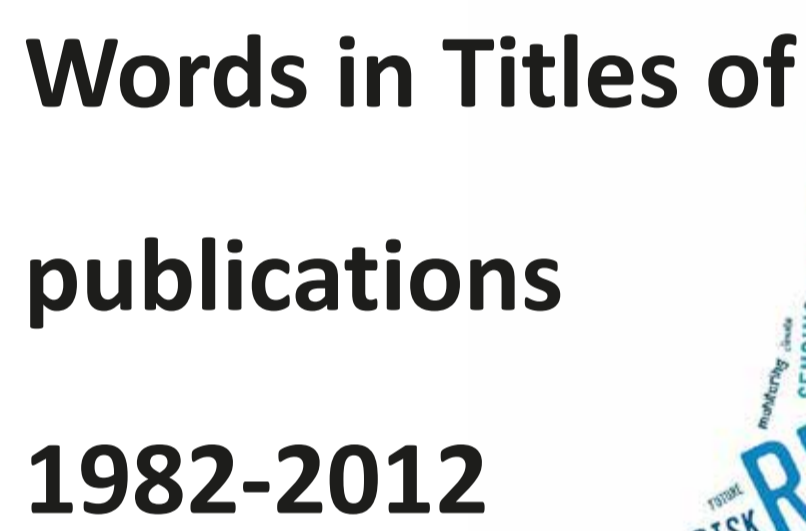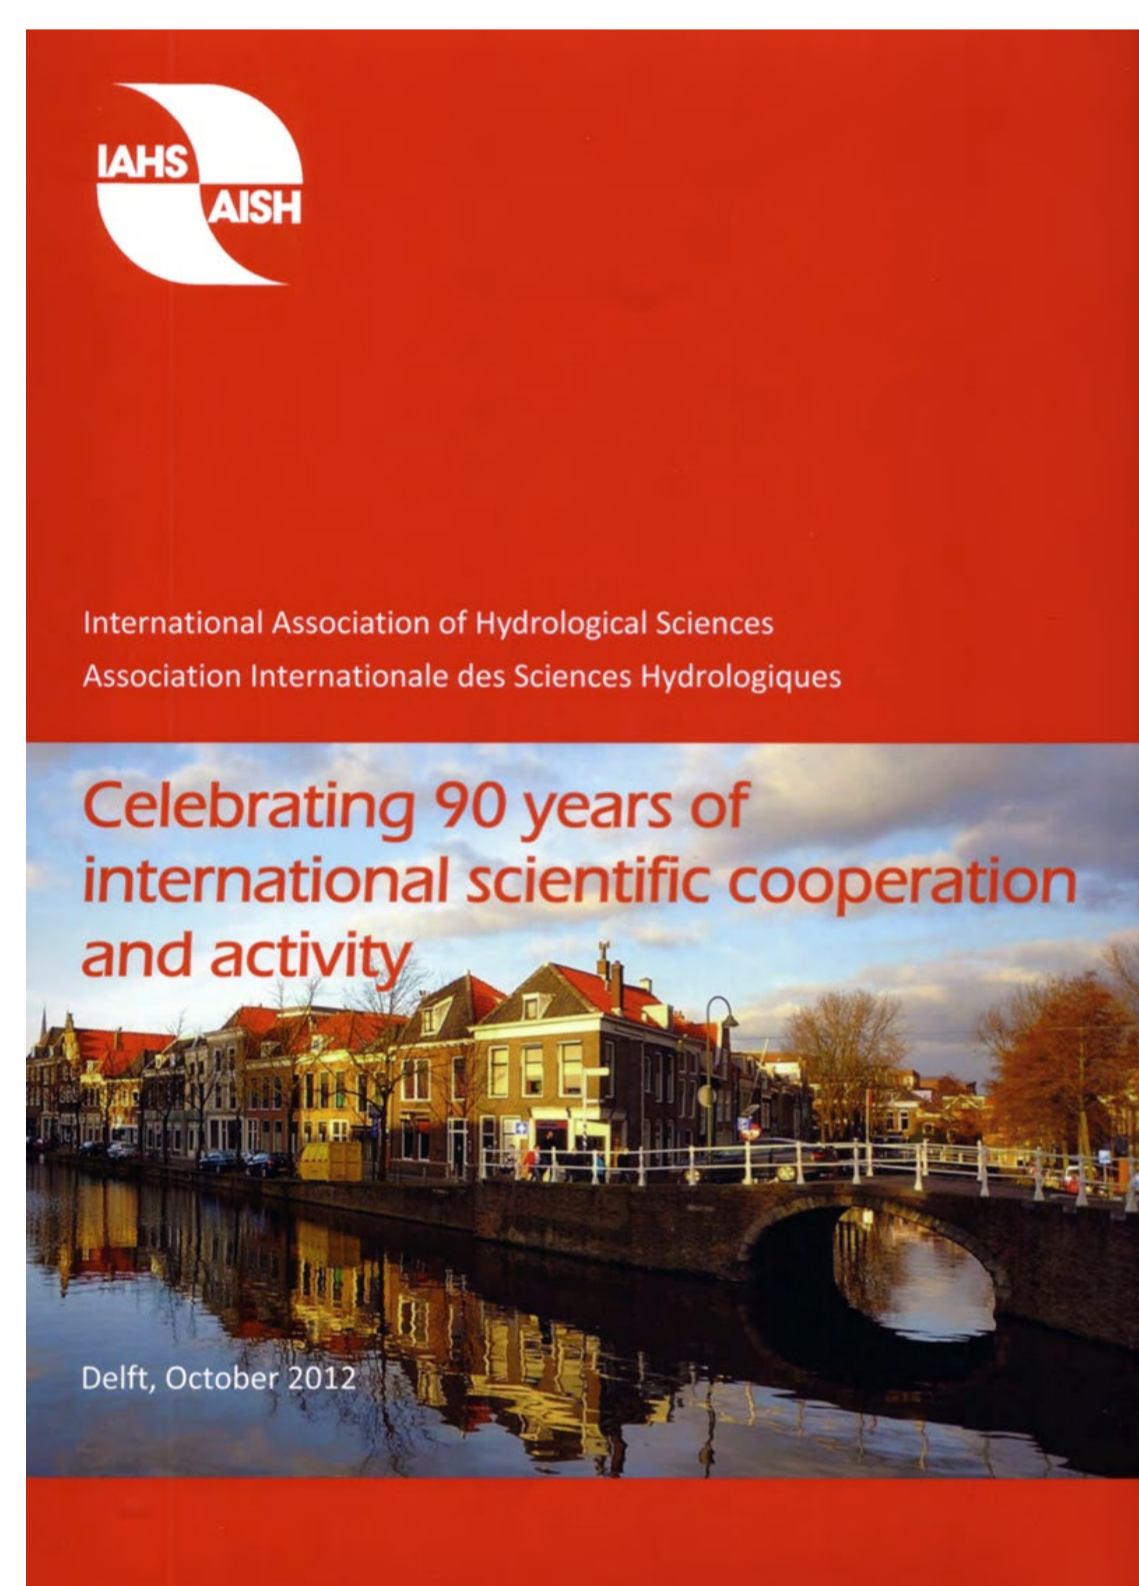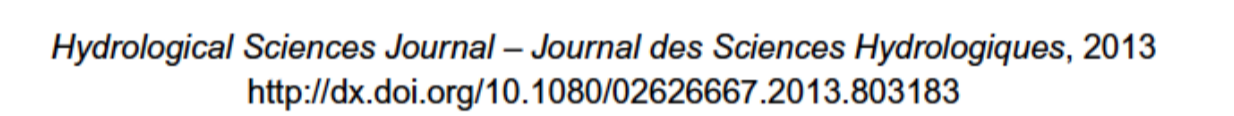

M. Hrachowitz<sup>1</sup>, H. H. G. Savenije<sup>1,2†</sup>, G. Blösch<sup>13†</sup>, J. J. McDonnell<sup>4,5†</sup>, M. Sivapalan<sup>6†</sup>, J. W. Pomeroy<sup>7†</sup>, B. Arheimer<sup>8</sup>, T. Blume<sup>9</sup>, M. P. Clark<sup>10</sup>, U. Ehret<sup>11</sup>, F. Fenicia<sup>1,12</sup>, J. E. Freer<sup>13</sup>, A. Gelfan<sup>14</sup>, H. V. Gupta<sup>15</sup>, D. A. Hughes<sup>16</sup>, R. W. Hut<sup>1</sup>, A. Montanari<sup>17</sup>, S. Pande<sup>1</sup>, D. Tetzlaff<sup>2</sup>, P. A. Troch<sup>15</sup>, S. Uhlenbrook<sup>1,2</sup>, T. Wagener<sup>18</sup>, H. C. Winsemius<sup>19</sup>, R. A. Woods<sup>18</sup>, E. Zehe<sup>11</sup> and C. Cudennec<sup>20‡</sup>

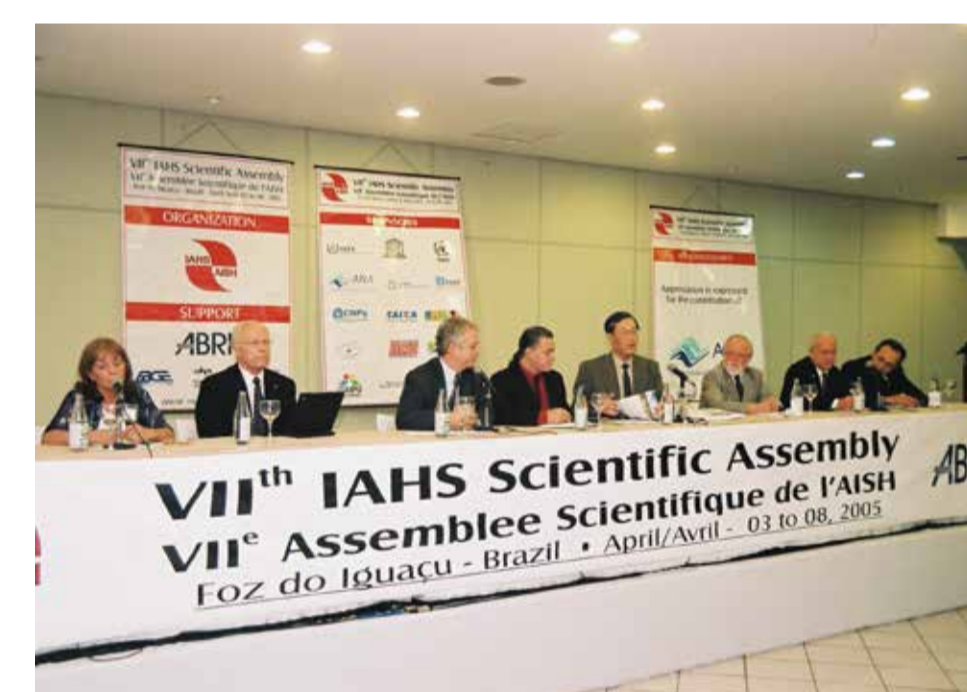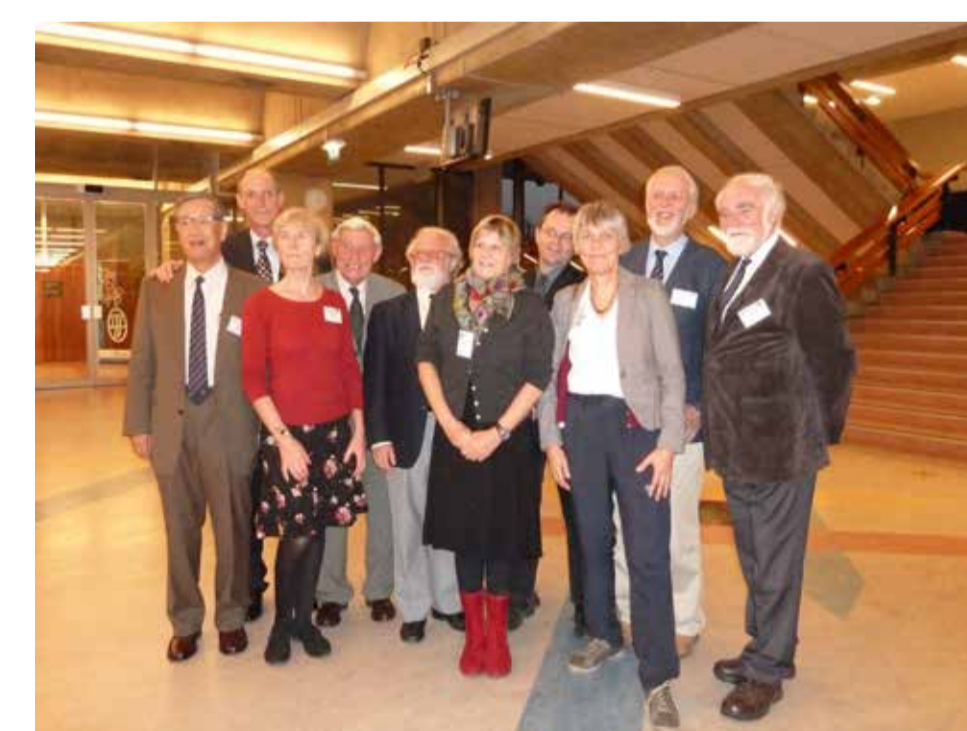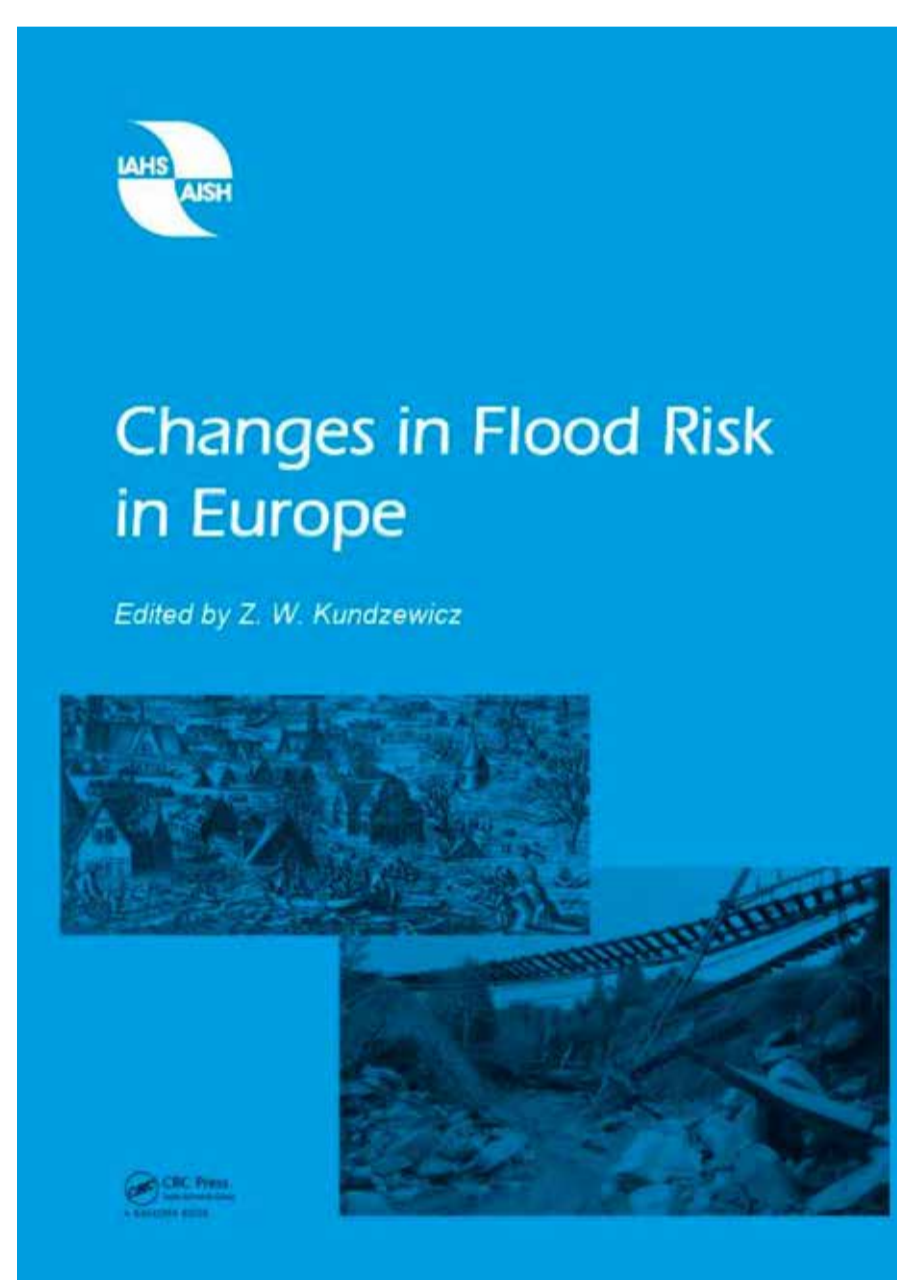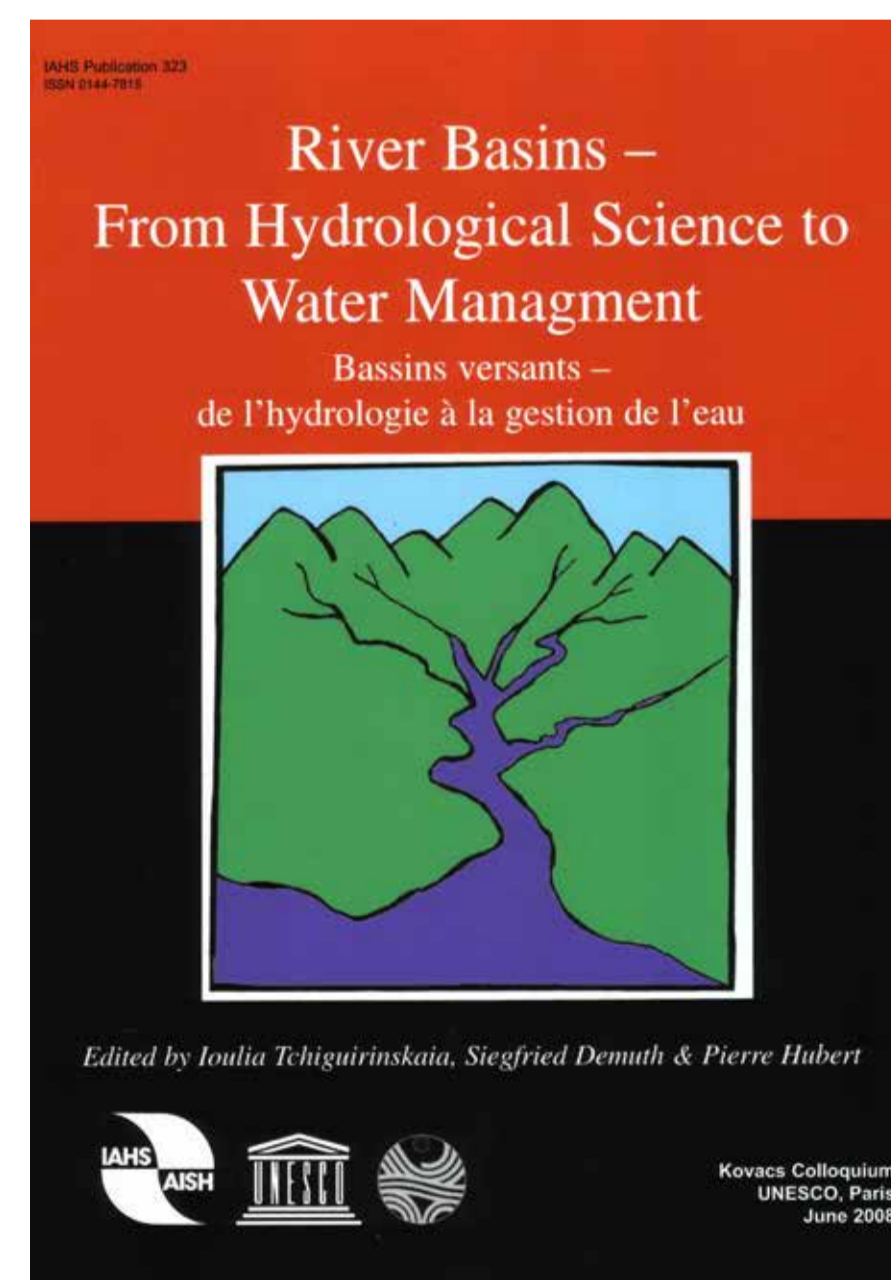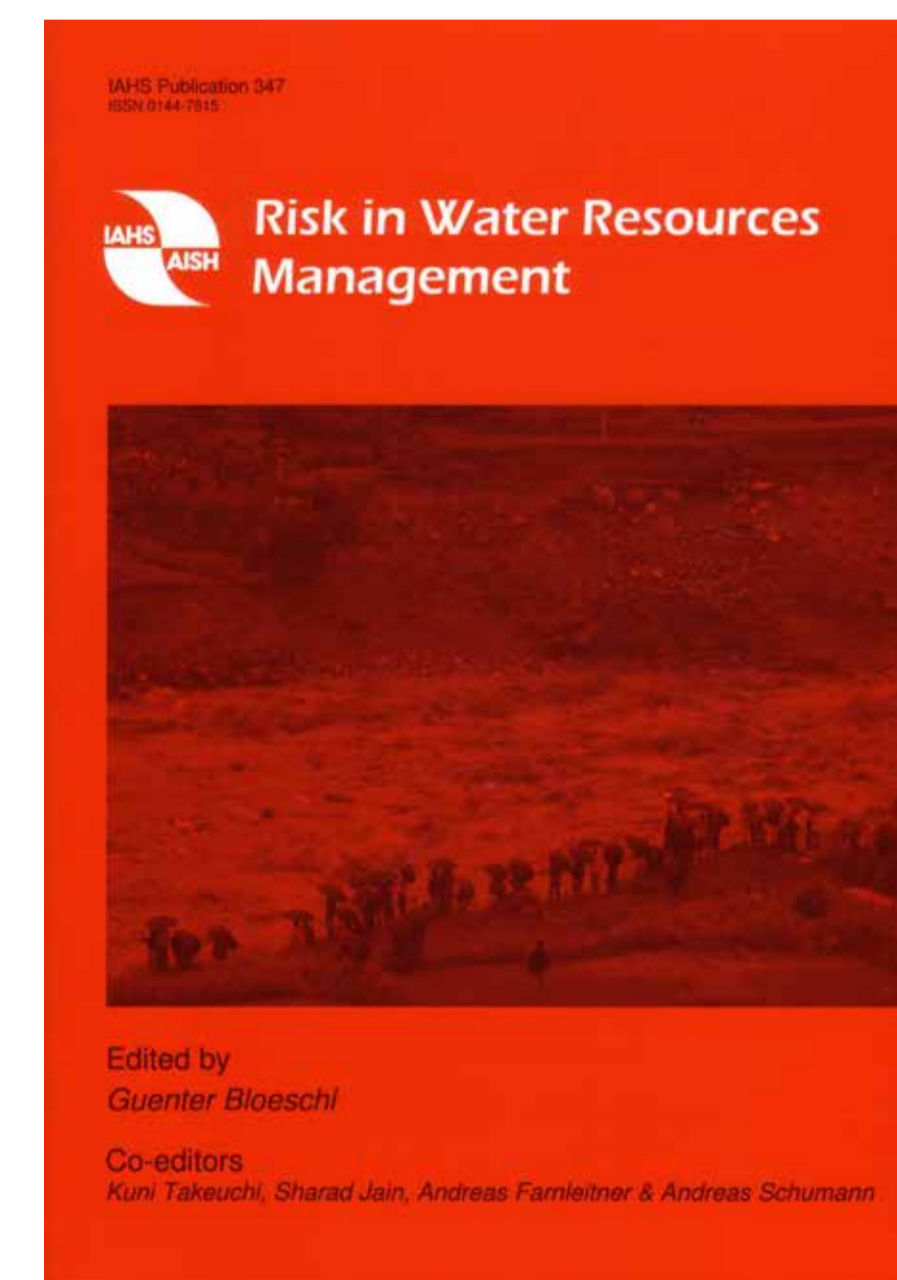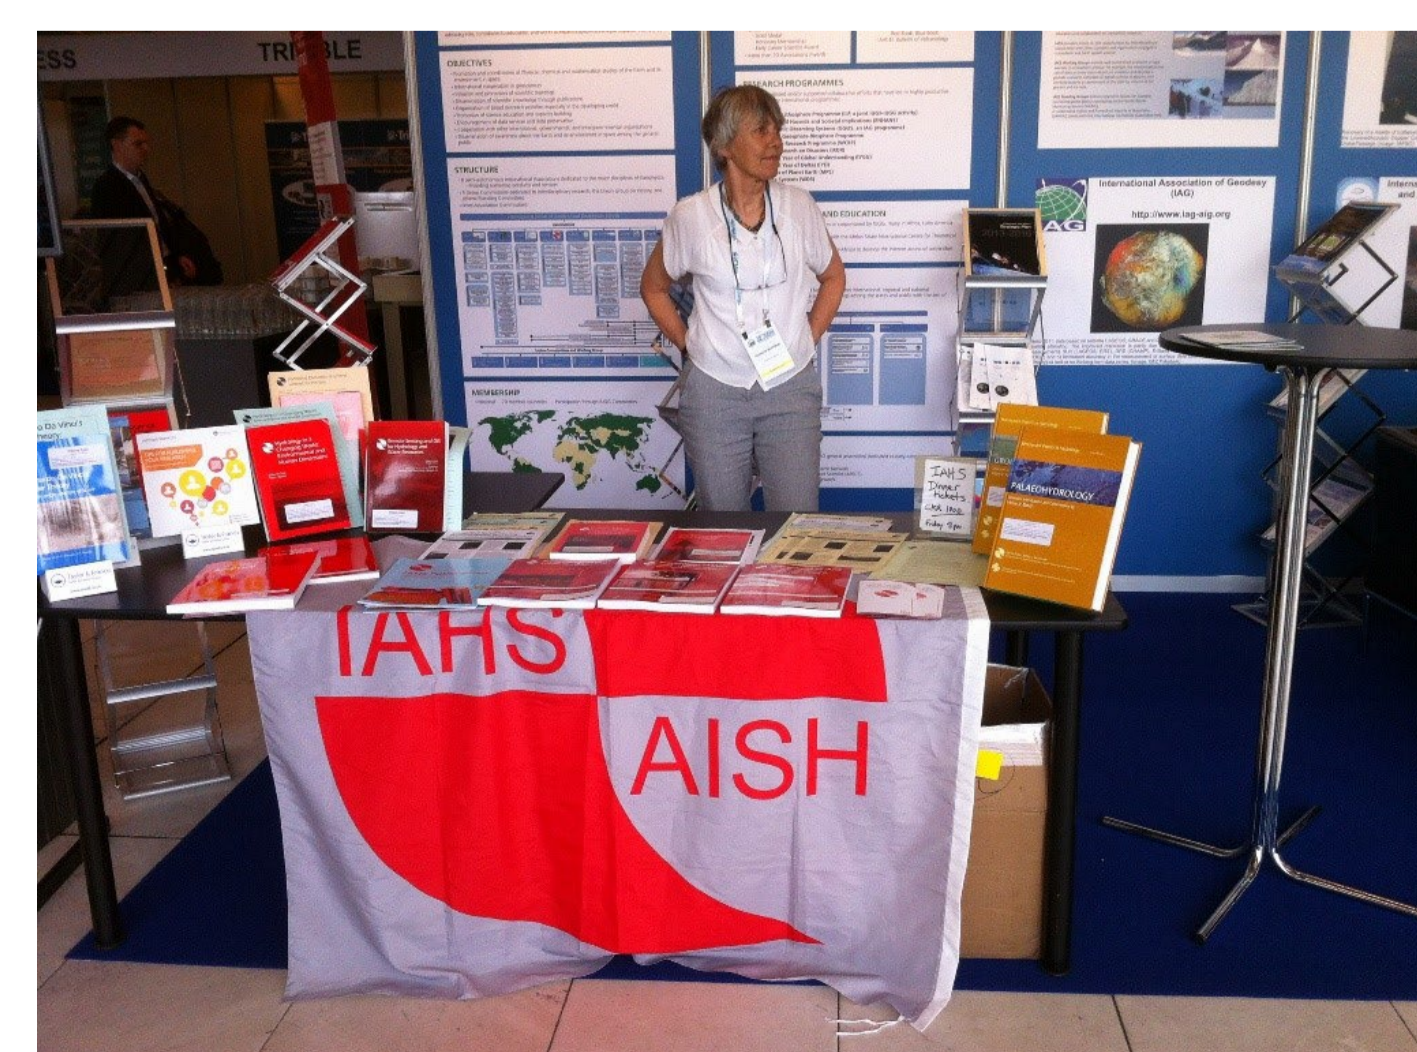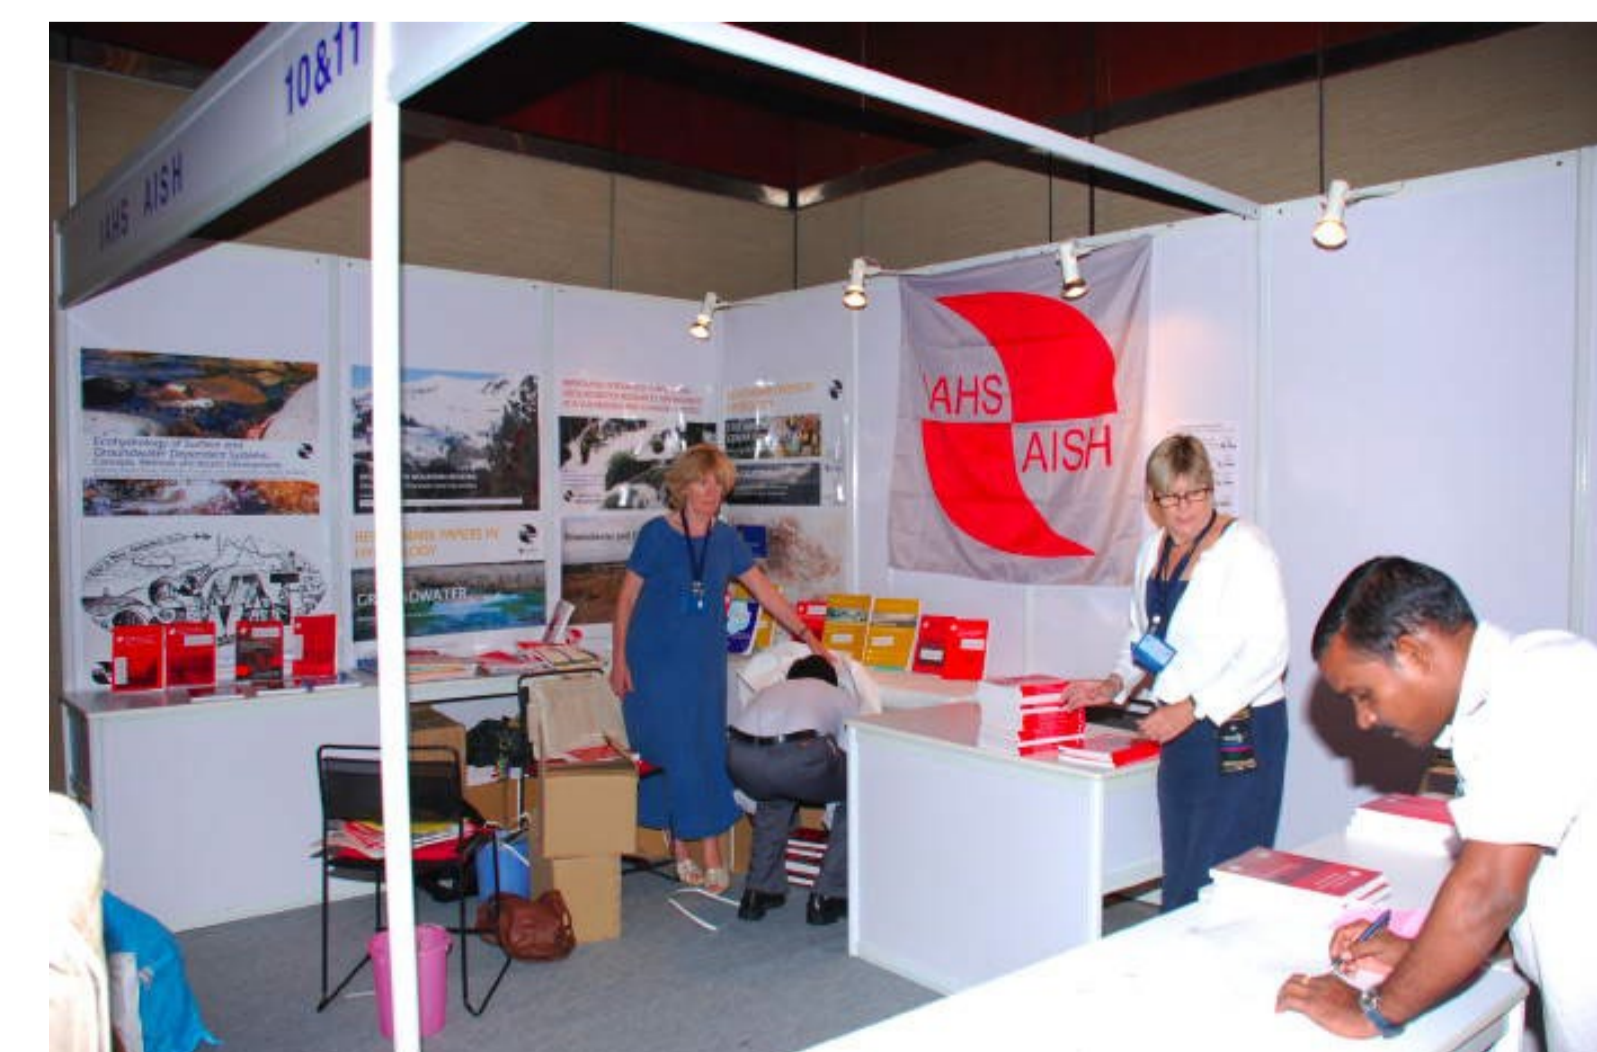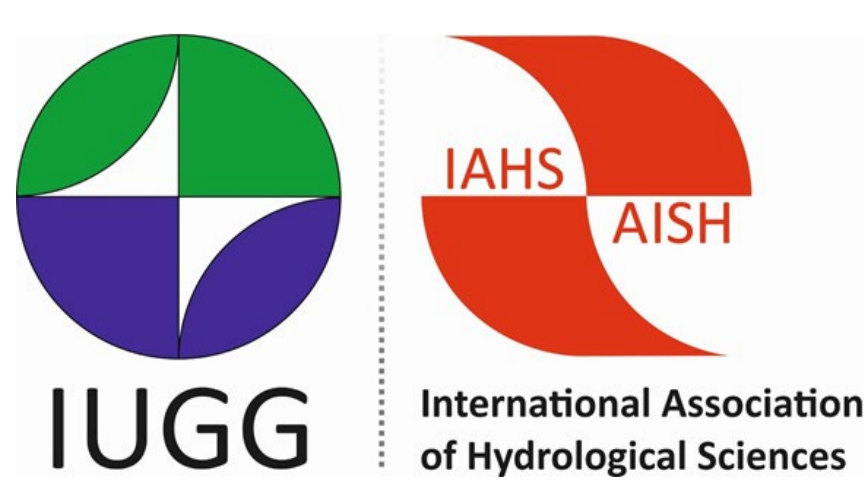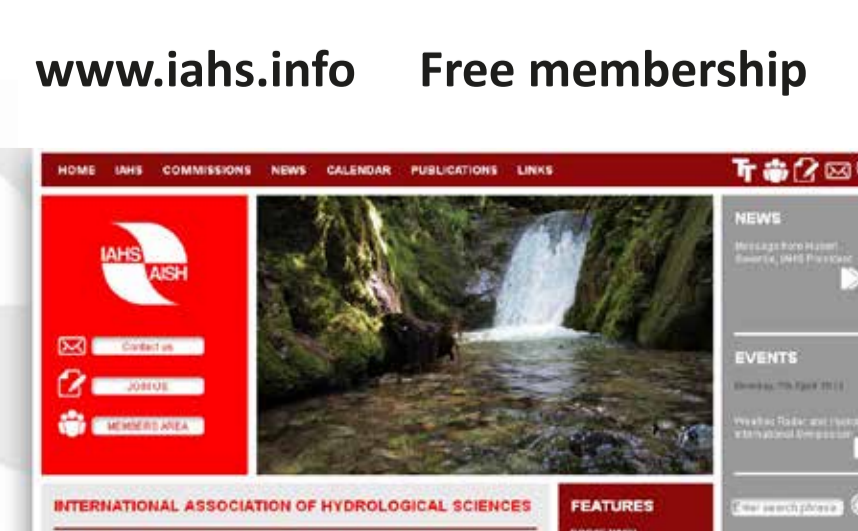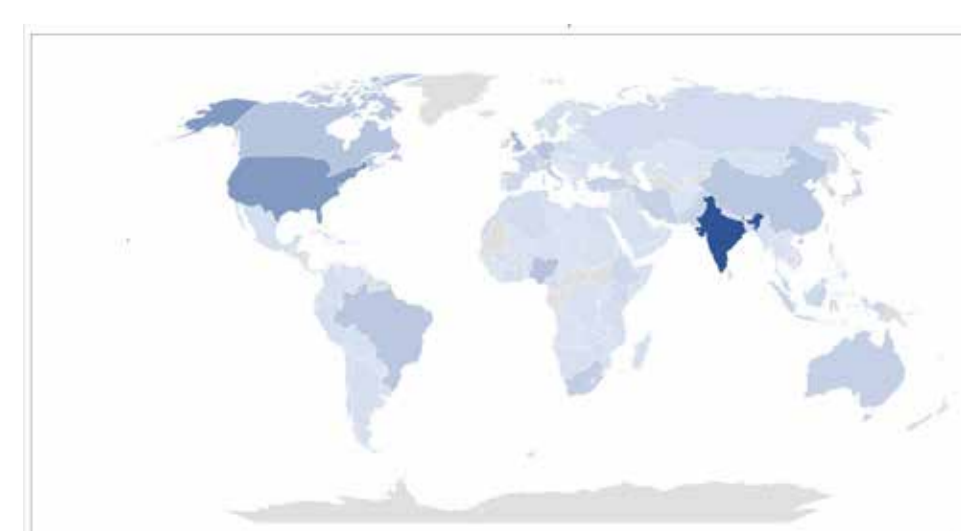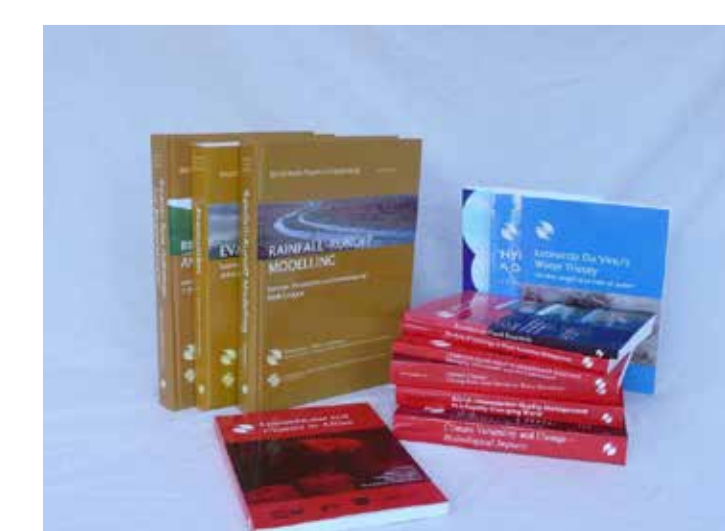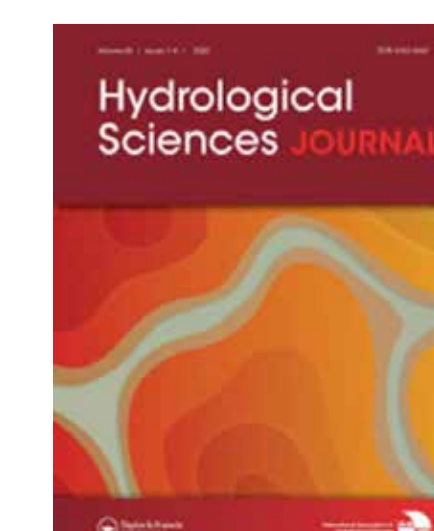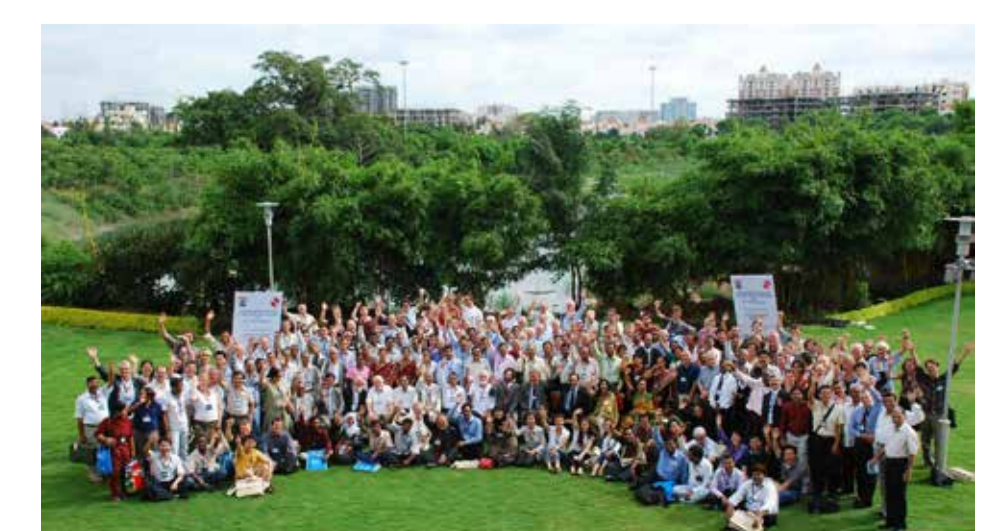



2012-2022

2018: ICSU merges into the ISC International Science Council

IAHS official partner of UN Water, including WWDRs & SDG6 process

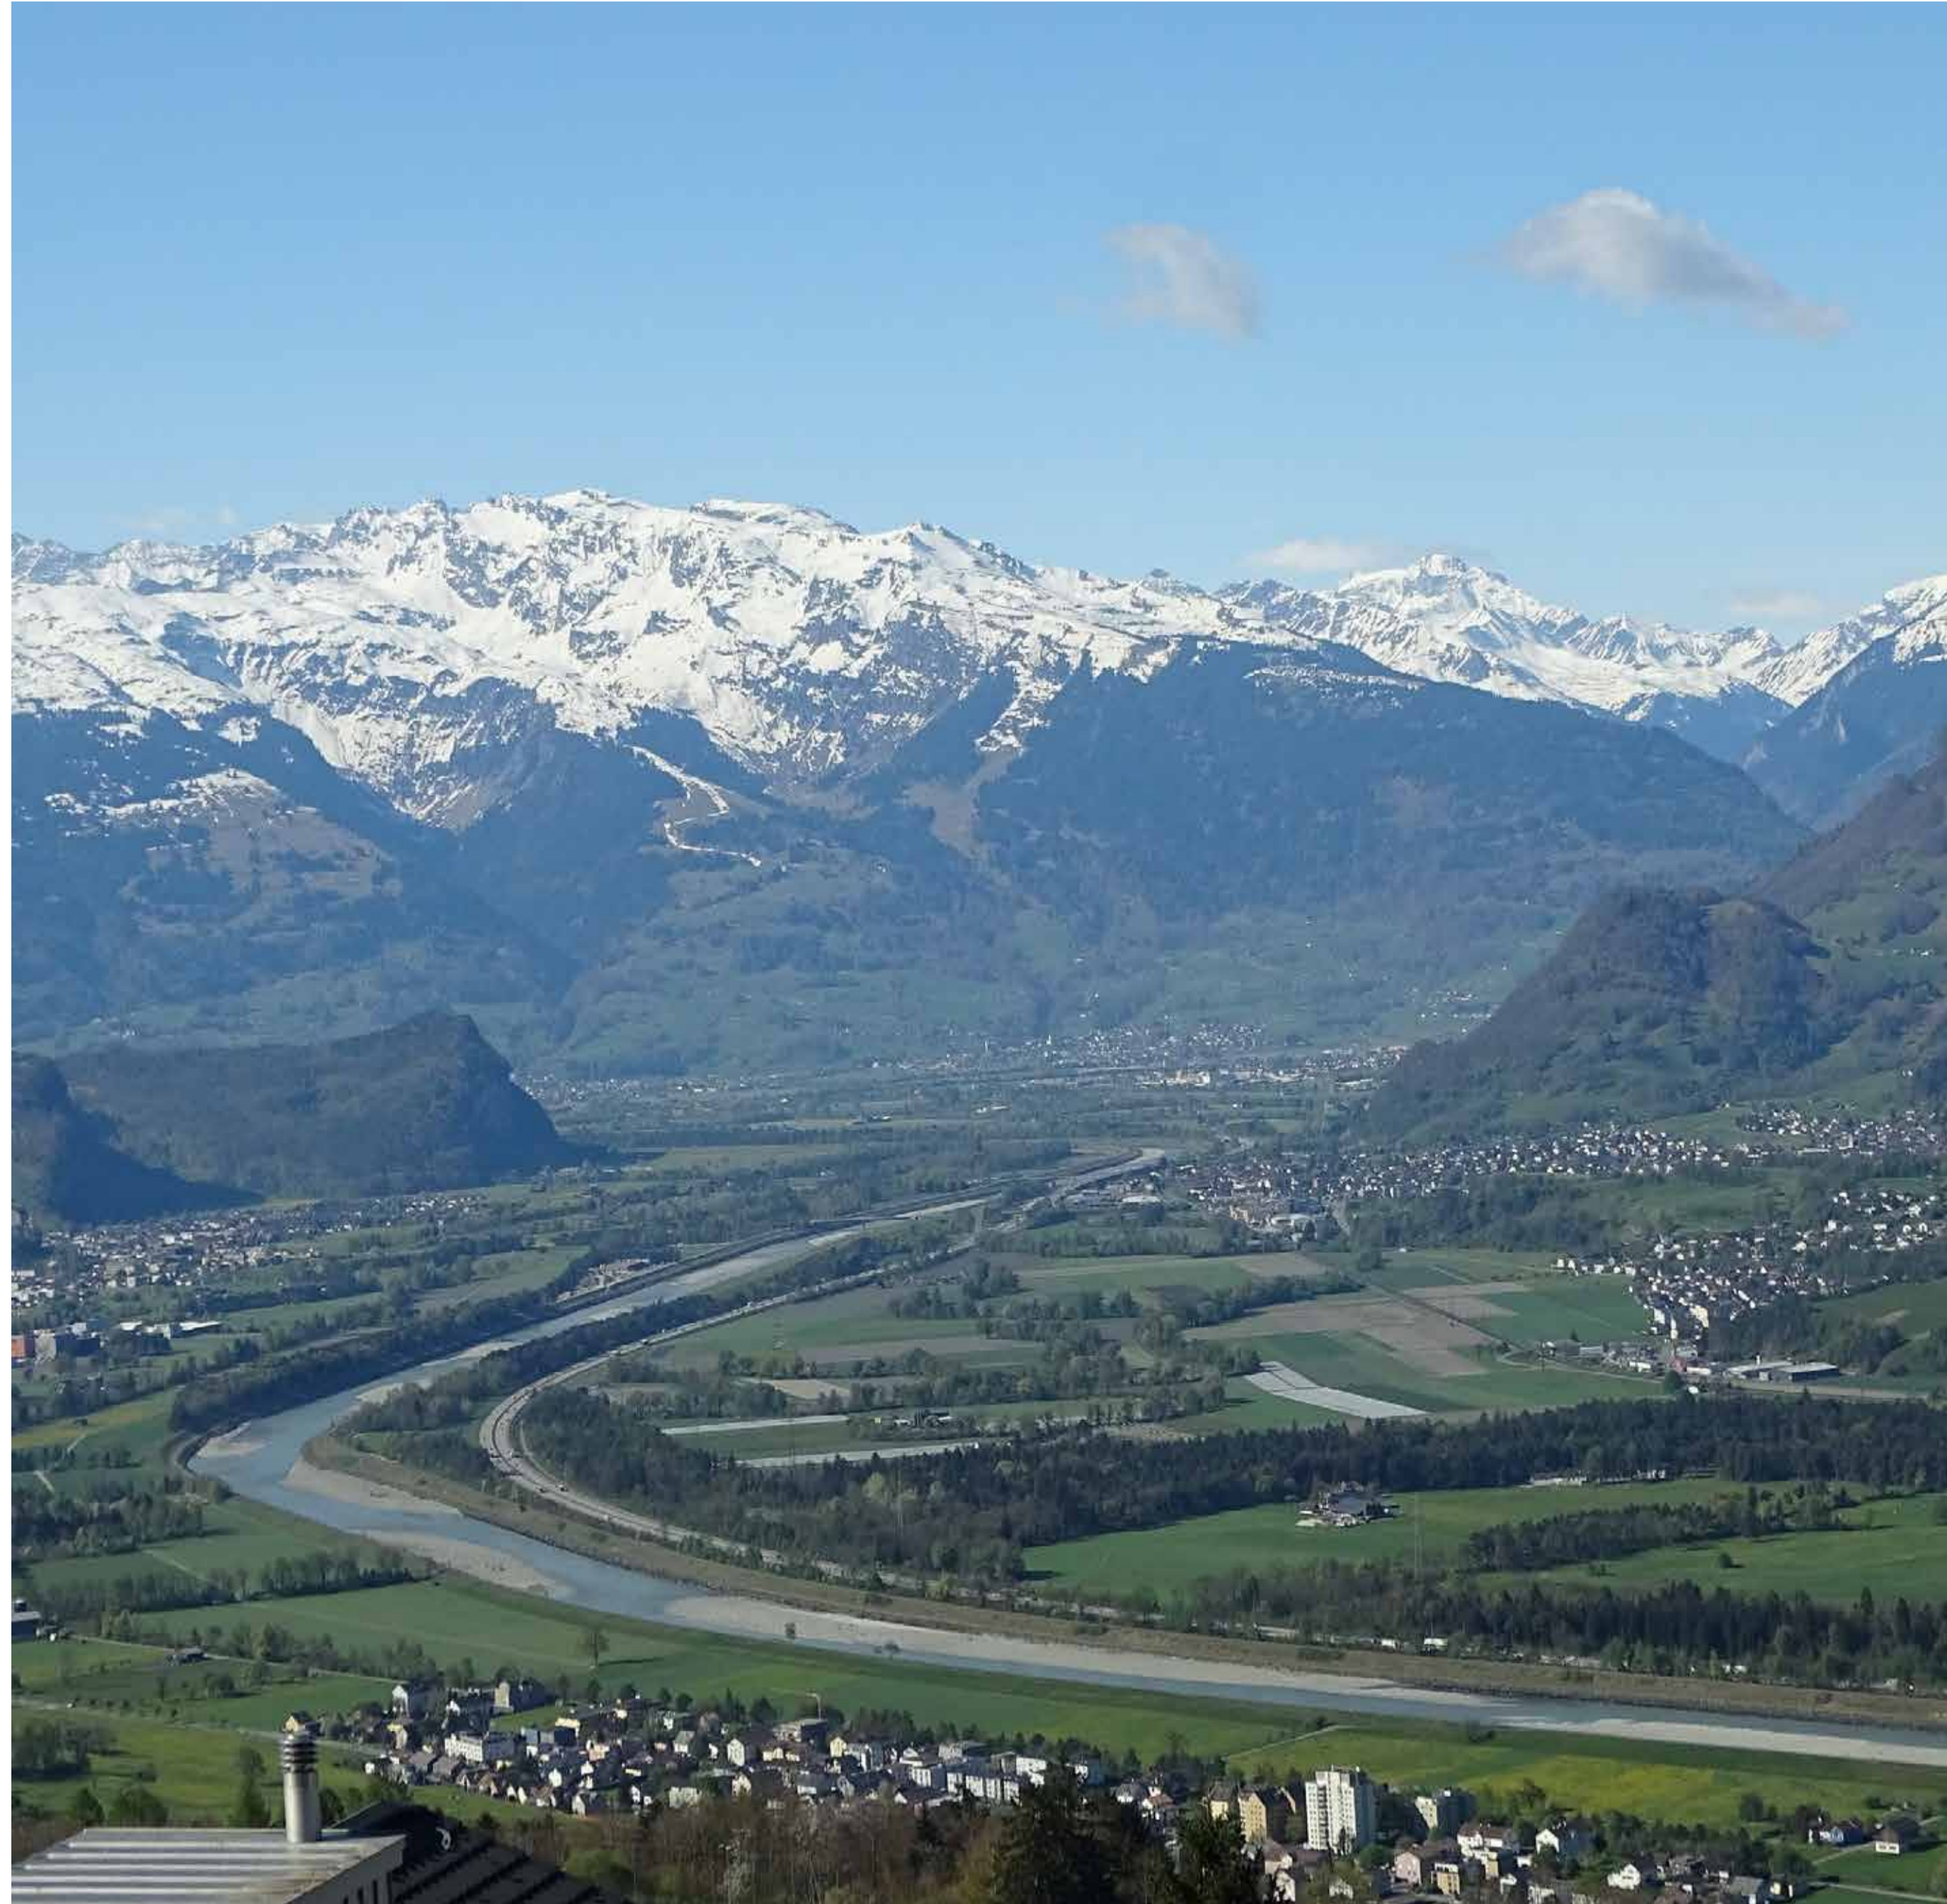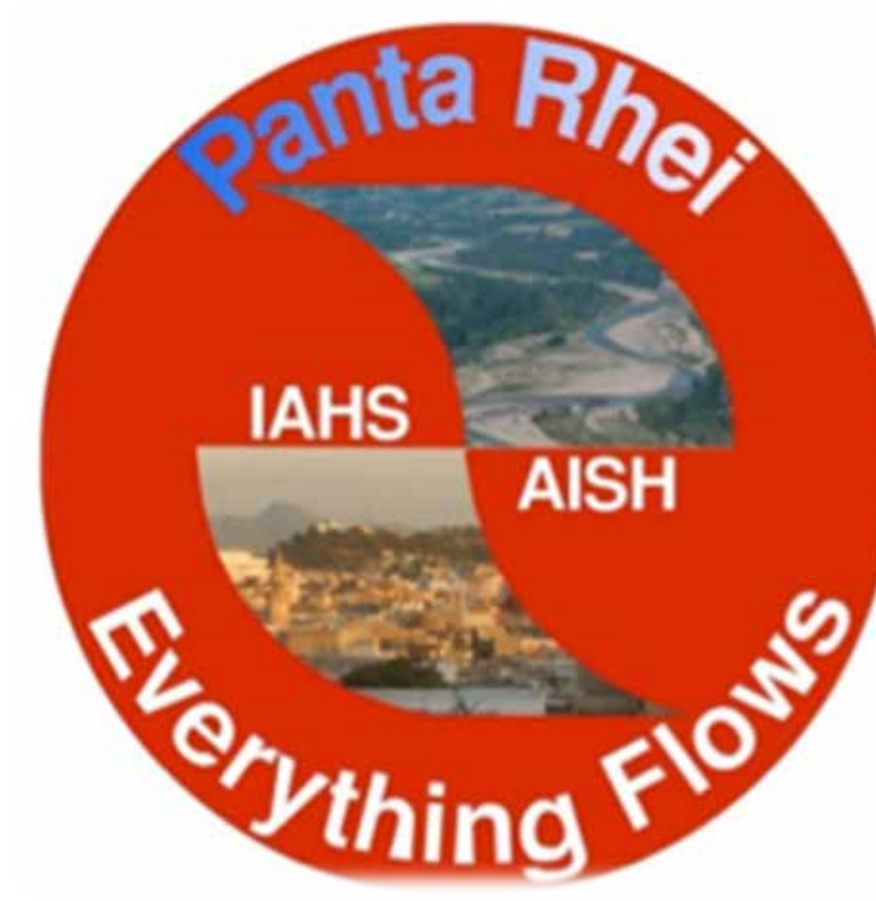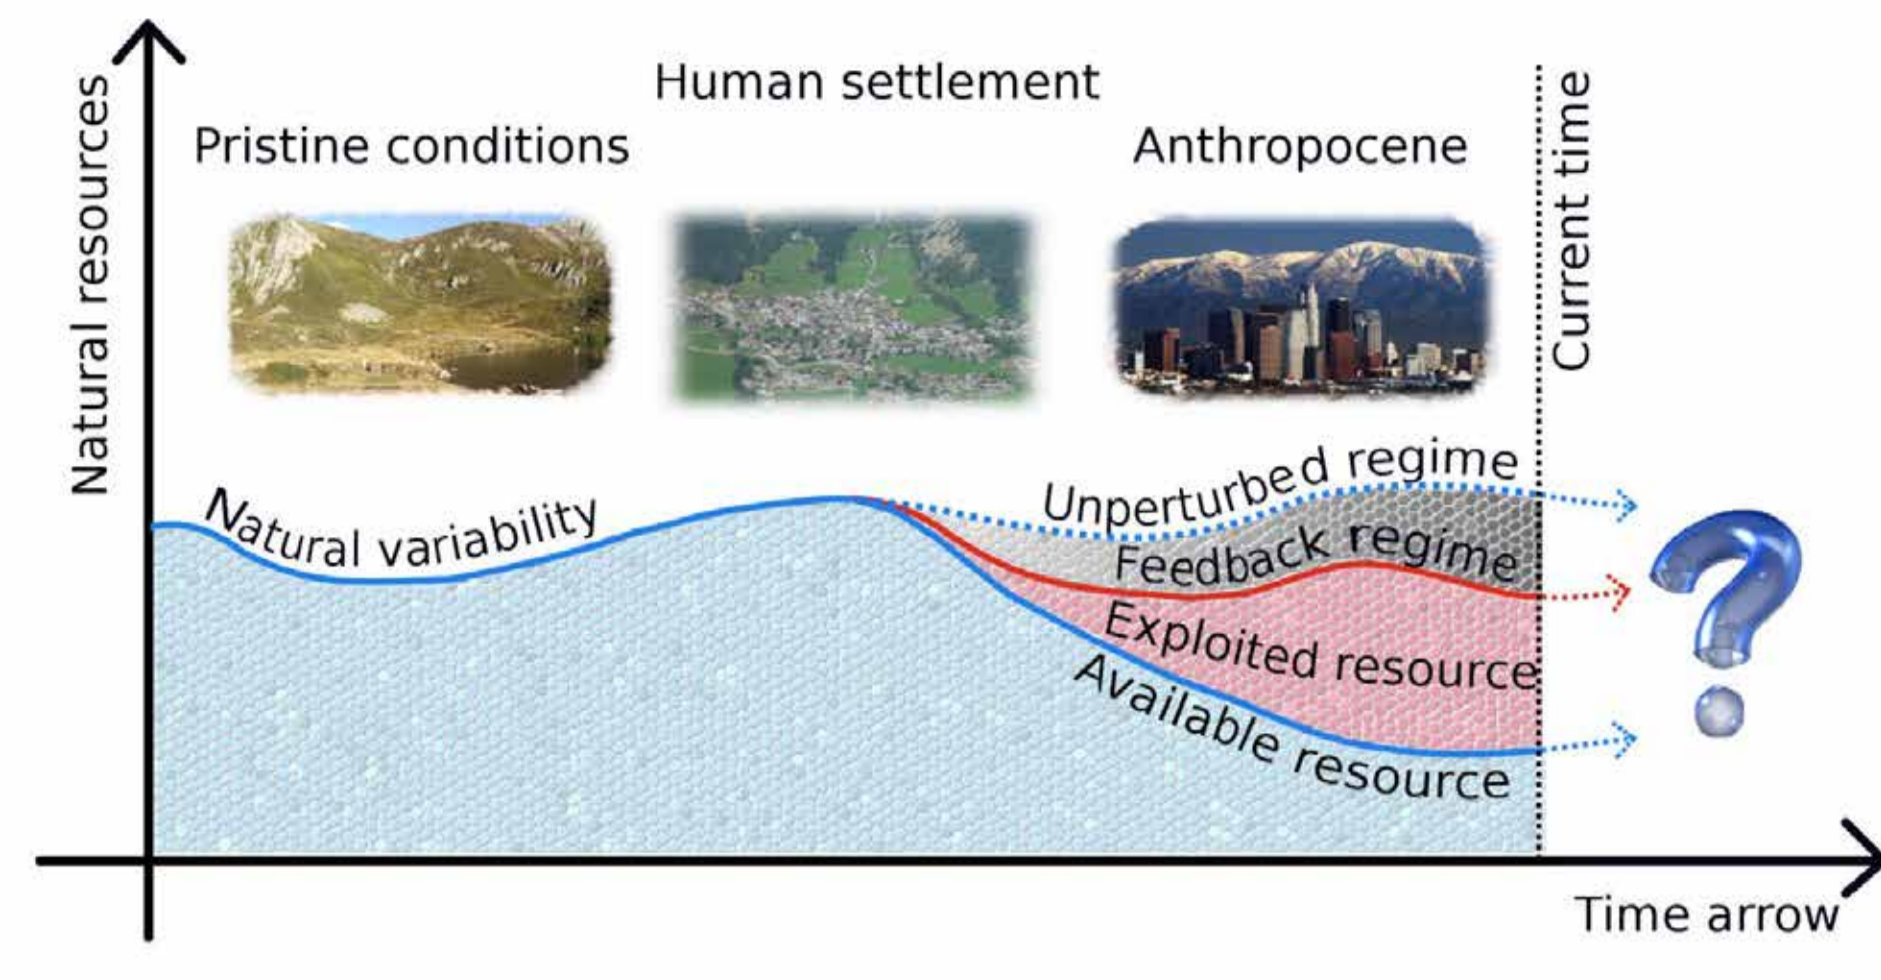

### “Panta Rhei—Everything Flows”: Change in hydrology and society—The IAHS Scientific Decade 2013–2022

A. Montanari<sup>1</sup>, G. Young<sup>2</sup>, H. H. G. Savenije<sup>3</sup>, D. Hughes<sup>4</sup>, T. Wagener<sup>5</sup>, L. L. Ren<sup>6</sup>, D. Koutsoyiannis<sup>7</sup>, C. Cudennec<sup>8</sup>, E. Toth<sup>1</sup>, S. Grimaldi<sup>9</sup>, G. Blöschl<sup>10</sup>, M. Sivapalan<sup>11</sup>, K. Beven<sup>12</sup>, H. Gupta<sup>13</sup>, M. Hipsey<sup>14</sup>, B. Schaeffli<sup>15</sup>, B. Arheimer<sup>16</sup>, E. Boegh<sup>17</sup>, S. J. Schymanski<sup>18</sup>, G. Di Baldassarre<sup>19</sup>, B. Yu<sup>20</sup>, P. Hubert<sup>21</sup>, Y. Huang<sup>22</sup>, A. Schumann<sup>23</sup>, D. A. Post<sup>24</sup>, V. Srinivasan<sup>25</sup>, C. Harman<sup>26</sup>, S. Thompson<sup>27</sup>, M. Rogger<sup>10</sup>, A. Viglione<sup>10</sup>, H. McMillan<sup>28</sup>, G. Characklis<sup>29</sup>, Z. Pang<sup>30</sup> and V. Belyaev<sup>31</sup>

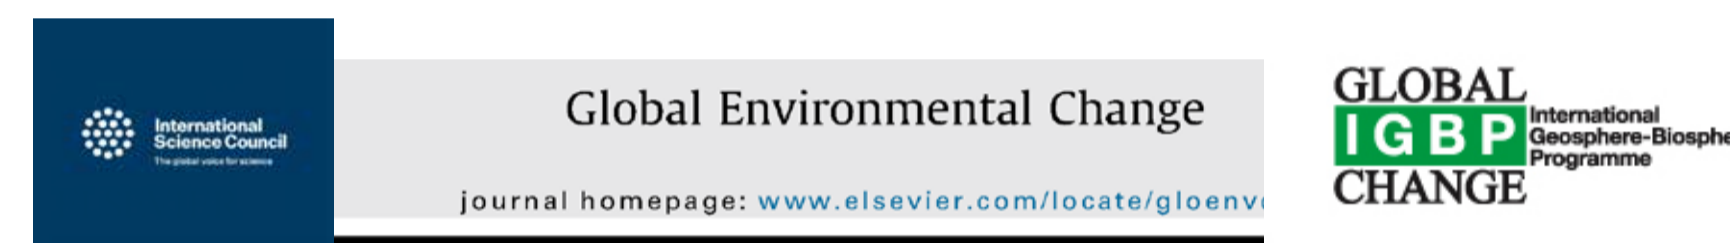

#### Re-conceptualizing the Anthropocene: A call for collaboration

Eduardo S. Brondizio<sup>a,\*</sup>, Karen O'Brien<sup>b</sup>, Xuemei Bai<sup>c</sup>, Frank Biermann<sup>d</sup>, Will Steffen<sup>e,f</sup>, Frans Berkhout<sup>g</sup>, Christophe Cudennec<sup>h</sup>, Maria Carmen Lemos<sup>i</sup>, Alexander Wolfe<sup>j</sup>, Jose Palma-Oliveira<sup>k</sup>, Chen-Tung Arthur Chen<sup>l</sup>

#### Water Resources Research

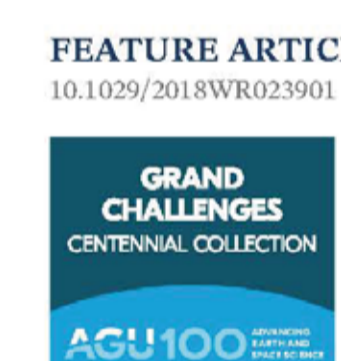

#### Sociohydrology: Scientific Challenges in Addressing the Sustainable Development Goals

Giuliano Di Baldassarre<sup>a,\*</sup>, Murugesu Sivapalan<sup>a,b</sup>, Maria Rusca<sup>a,c</sup>, Elena Mondino<sup>a,d</sup>, Johanna Mird<sup>a,e</sup>, Saket Pande<sup>a</sup>, Matthew R. Sanderson<sup>a</sup>, Fangfang Tian<sup>a</sup>, Alberto Viglione<sup>a,b,f</sup>, Jing Wei<sup>a</sup>, Yongming Wei<sup>a</sup>, David J. Yu<sup>a,b,g</sup>, Veena Srinivasan<sup>a</sup>, and Günter Blöschl<sup>a</sup>

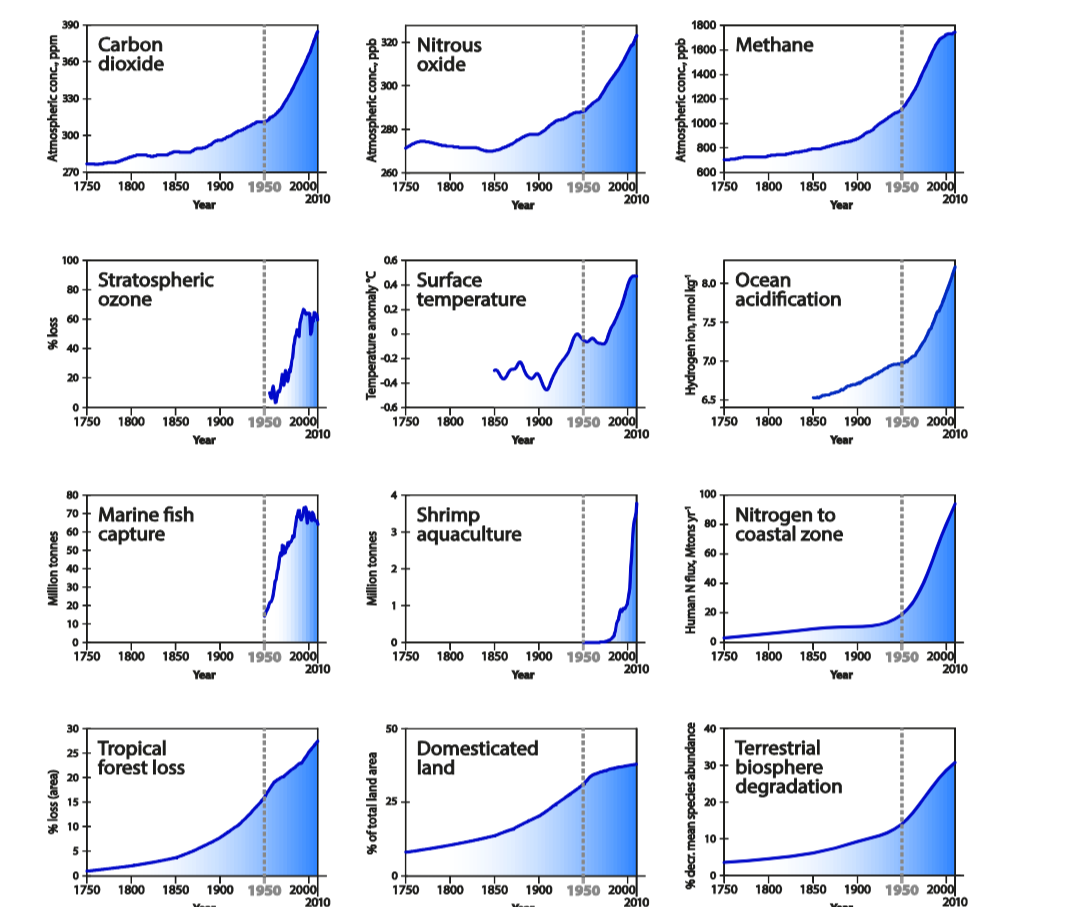

|                | SDG 1 | SDG 2 | SDG 3 | SDG 4 | SDG 5 | SDG 6 | SDG 7 | SDG 8 | SDG 9 | SDG 10 | SDG 11 | SDG 12 | SDG 13 | SDG 14 | SDG 15 |
|----------------|-------|-------|-------|-------|-------|-------|-------|-------|-------|--------|--------|--------|--------|--------|--------|
| Water          |       |       |       |       |       |       |       |       |       |        |        |        |        |        |        |
| Energy         |       |       |       |       |       |       |       |       |       |        |        |        |        |        |        |
| Industry       |       |       |       |       |       |       |       |       |       |        |        |        |        |        |        |
| Infrastructure |       |       |       |       |       |       |       |       |       |        |        |        |        |        |        |
| Environment    |       |       |       |       |       |       |       |       |       |        |        |        |        |        |        |
| Society        |       |       |       |       |       |       |       |       |       |        |        |        |        |        |        |
| Policy         |       |       |       |       |       |       |       |       |       |        |        |        |        |        |        |

HYDROLOGICAL SCIENCES JOURNAL  
2019, VOL. 64, NO. 10, 1141–1158  
<https://doi.org/10.1080/02626667.2019.1620507>

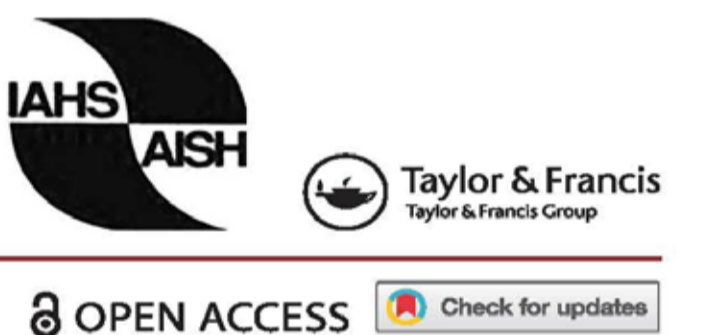

#### Twenty-three unsolved problems in hydrology (UPH) – a community perspective

Günter Blöschl<sup>a,\*</sup>, Marc F.P. Bierkens<sup>b</sup>, Antonio Chambel<sup>c</sup>, Christophe Cudennec<sup>d</sup>, Georgia Destouni<sup>e</sup>, Aldo Fiori<sup>f</sup>, James W. Kirchner<sup>g</sup>, Jeffrey J. McDonnell<sup>h</sup>, Hubert H.G. Savenije<sup>i</sup>, Murugesu Sivapalan<sup>j,k</sup>, Christine Stump<sup>l</sup>, Elena Toth<sup>m</sup>, Elena Volpi<sup>n</sup>, Gemma Carr<sup>o</sup>, José Salinas<sup>p</sup>, Borbála Széles<sup>q</sup>, Alberto Viglione<sup>r</sup>, Hafizullah Aksoy<sup>s</sup>, Scott T. Allen<sup>t</sup>, Anam Amin<sup>u</sup>, Vazken Andréassian<sup>v</sup>, Rerit Arheimer<sup>w</sup>, Santosh K. Aral<sup>x</sup>, Victor Baker<sup>y</sup>, Earl Theisen<sup>z</sup>, Michael Beven<sup>aa</sup>, Thomas Blöschl<sup>ab</sup>, Yuliya Bratslavsky<sup>ac</sup>, Yuliya Bratslavsky<sup>ad</sup>, Yuliya Bratslavsky<sup>ae</sup>, Yuliya Bratslavsky<sup>af</sup>, Yuliya Bratslavsky<sup>ag</sup>, Yuliya Bratslavsky<sup>ah</sup>, Yuliya Bratslavsky<sup>ai</sup>, Yuliya Bratslavsky<sup>aj</sup>, Yuliya Bratslavsky<sup>ak</sup>, Yuliya Bratslavsky<sup>al</sup>, Yuliya Bratslavsky<sup>am</sup>, Yuliya Bratslavsky<sup>an</sup>, Yuliya Bratslavsky<sup>ao</sup>, Yuliya Bratslavsky<sup>ap</sup>, Yuliya Bratslavsky<sup>aq</sup>, Yuliya Bratslavsky<sup>ar</sup>, Yuliya Bratslavsky<sup>as</sup>, Yuliya Bratslavsky<sup>at</sup>, Yuliya Bratslavsky<sup>au</sup>, Yuliya Bratslavsky<sup>av</sup>, Yuliya Bratslavsky<sup>aw</sup>, Yuliya Bratslavsky<sup>ax</sup>, Yuliya Bratslavsky<sup>ay</sup>, Yuliya Bratslavsky<sup>az</sup>, Yuliya Bratslavsky<sup>ba</sup>, Yuliya Bratslavsky<sup>bb</sup>, Yuliya Bratslavsky<sup>bc</sup>, Yuliya Bratslavsky<sup>bd</sup>, Yuliya Bratslavsky<sup>be</sup>, Yuliya Bratslavsky<sup>bf</sup>, Yuliya Bratslavsky<sup>bg</sup>, Yuliya Bratslavsky<sup>bh</sup>, Yuliya Bratslavsky<sup>bi</sup>, Yuliya Bratslavsky<sup>bj</sup>, Yuliya Bratslavsky<sup>bk</sup>, Yuliya Bratslavsky<sup>bl</sup>, Yuliya Bratslavsky<sup>bm</sup>, Yuliya Bratslavsky<sup>bn</sup>, Yuliya Bratslavsky<sup>bo</sup>, Yuliya Bratslavsky<sup>bp</sup>, Yuliya Bratslavsky<sup>bq</sup>, Yuliya Bratslavsky<sup>br</sup>, Yuliya Bratslavsky<sup>bs</sup>, Yuliya Bratslavsky<sup>bt</sup>, Yuliya Bratslavsky<sup>bu</sup>, Yuliya Bratslavsky<sup>bv</sup>, Yuliya Bratslavsky<sup>bw</sup>, Yuliya Bratslavsky<sup>bx</sup>, Yuliya Bratslavsky<sup>by</sup>, Yuliya Bratslavsky<sup>bz</sup>, Yuliya Bratslavsky<sup>ca</sup>, Yuliya Bratslavsky<sup>cb</sup>, Yuliya Bratslavsky<sup>cc</sup>, Yuliya Bratslavsky<sup>cd</sup>, Yuliya Bratslavsky<sup>ce</sup>, Yuliya Bratslavsky<sup>cf</sup>, Yuliya Bratslavsky<sup>cg</sup>, Yuliya Bratslavsky<sup>ch</sup>, Yuliya Bratslavsky<sup>ci</sup>, Yuliya Bratslavsky<sup>cj</sup>, Yuliya Bratslavsky<sup>ck</sup>, Yuliya Bratslavsky<sup>cl</sup>, Yuliya Bratslavsky<sup>cm</sup>, Yuliya Bratslavsky<sup>cn</sup>, Yuliya Bratslavsky<sup>co</sup>, Yuliya Bratslavsky<sup>cp</sup>, Yuliya Bratslavsky<sup>cq</sup>, Yuliya Bratslavsky<sup>cr</sup>, Yuliya Bratslavsky<sup>cs</sup>, Yuliya Bratslavsky<sup>ct</sup>, Yuliya Bratslavsky<sup>cu</sup>, Yuliya Bratslavsky<sup>cv</sup>, Yuliya Bratslavsky<sup>cw</sup>, Yuliya Bratslavsky<sup>cx</sup>, Yuliya Bratslavsky<sup>cy</sup>, Yuliya Bratslavsky<sup>cz</sup>, Yuliya Bratslavsky<sup>da</sup>, Yuliya Bratslavsky<sup>db</sup>, Yuliya Bratslavsky<sup>dc</sup>, Yuliya Bratslavsky<sup>dd</sup>, Yuliya Bratslavsky<sup>de</sup>, Yuliya Bratslavsky<sup>df</sup>, Yuliya Bratslavsky<sup>dg</sup>, Yuliya Bratslavsky<sup>dh</sup>, Yuliya Bratslavsky<sup>di</sup>, Yuliya Bratslavsky<sup>dj</sup>, Yuliya Bratslavsky<sup>dk</sup>, Yuliya Bratslavsky<sup>dl</sup>, Yuliya Bratslavsky<sup>dm</sup>, Yuliya Bratslavsky<sup>dn</sup>, Yuliya Bratslavsky<sup>do</sup>, Yuliya Bratslavsky<sup>dp</sup>, Yuliya Bratslavsky<sup>dq</sup>, Yuliya Bratslavsky<sup>dr</sup>, Yuliya Bratslavsky<sup>ds</sup>, Yuliya Bratslavsky<sup>dt</sup>, Yuliya Bratslavsky<sup>du</sup>, Yuliya Bratslavsky<sup>dv</sup>, Yuliya Bratslavsky<sup>dw</sup>, Yuliya Bratslavsky<sup>dx</sup>, Yuliya Bratslavsky<sup>dy</sup>, Yuliya Bratslavsky<sup>dz</sup>, Yuliya Bratslavsky<sup>ea</sup>, Yuliya Bratslavsky<sup>eb</sup>, Yuliya Bratslavsky<sup>ec</sup>, Yuliya Bratslavsky<sup>ed</sup>, Yuliya Bratslavsky<sup>ee</sup>, Yuliya Bratslavsky<sup>ef</sup>, Yuliya Bratslavsky<sup>eg</sup>, Yuliya Bratslavsky<sup>eh</sup>, Yuliya Bratslavsky<sup>ei</sup>, Yuliya Bratslavsky<sup>ej</sup>, Yuliya Bratslavsky<sup>ek</sup>, Yuliya Bratslavsky<sup>el</sup>, Yuliya Bratslavsky<sup>em</sup>, Yuliya Bratslavsky<sup>en</sup>, Yuliya Bratslavsky<sup>eo</sup>, Yuliya Bratslavsky<sup>ep</sup>, Yuliya Bratslavsky<sup>eq</sup>, Yuliya Bratslavsky<sup>er</sup>, Yuliya Bratslavsky<sup>es</sup>, Yuliya Bratslavsky<sup>et</sup>, Yuliya Bratslavsky<sup>eu</sup>, Yuliya Bratslavsky<sup>ev</sup>, Yuliya Bratslavsky<sup>ew</sup>, Yuliya Bratslavsky<sup>ex</sup>, Yuliya Bratslavsky<sup>ey</sup>, Yuliya Bratslavsky<sup>ez</sup>, Yuliya Bratslavsky<sup>fa</sup>, Yuliya Bratslavsky<sup>fb</sup>, Yuliya Bratslavsky<sup>fc</sup>, Yuliya Bratslavsky<sup>fd</sup>, Yuliya Bratslavsky<sup>fe</sup>, Yuliya Bratslavsky<sup>ff</sup>, Yuliya Bratslavsky<sup>fg</sup>, Yuliya Bratslavsky<sup>fh</sup>, Yuliya Bratslavsky<sup>fi</sup>, Yuliya Bratslavsky<sup>fj</sup>, Yuliya Bratslavsky<sup>fk</sup>, Yuliya Bratslavsky<sup>fl</sup>, Yuliya Bratslavsky<sup>fm</sup>, Yuliya Bratslavsky<sup>fn</sup>, Yuliya Bratslavsky<sup>fo</sup>, Yuliya Bratslavsky<sup>fp</sup>, Yuliya Bratslavsky<sup>fq</sup>, Yuliya Bratslavsky<sup>fr</sup>, Yuliya Bratslavsky<sup>fs</sup>, Yuliya Bratslavsky<sup>ft</sup>, Yuliya Bratslavsky<sup>fu</sup>, Yuliya Bratslavsky<sup>fv</sup>, Yuliya Bratslavsky<sup>fw</sup>, Yuliya Bratslavsky<sup>fx</sup>, Yuliya Bratslavsky<sup>fy</sup>, Yuliya Bratslavsky<sup>gz</sup>, Yuliya Bratslavsky<sup>ha</sup>, Yuliya Bratslavsky<sup>hb</sup>, Yuliya Bratslavsky<sup>hc</sup>, Yuliya Bratslavsky<sup>hd</sup>, Yuliya Bratslavsky<sup>he</sup>, Yuliya Bratslavsky<sup>hf</sup>, Yuliya Bratslavsky<sup>hg</sup>, Yuliya Bratslavsky<sup>hh</sup>, Yuliya Bratslavsky<sup>hi</sup>, Yuliya Bratslavsky<sup>hj</sup>, Yuliya Bratslavsky<sup>hk</sup>, Yuliya Bratslavsky<sup>hl</sup>, Yuliya Bratslavsky<sup>hm</sup>, Yuliya Bratslavsky<sup>hn</sup>, Yuliya Bratslavsky<sup>ho</sup>, Yuliya Bratslavsky<sup>hp</sup>, Yuliya Bratslavsky<sup>hq</sup>, Yuliya Bratslavsky<sup>hr</sup>, Yuliya Bratslavsky<sup>hs</sup>, Yuliya Bratslavsky<sup>ht</sup>, Yuliya Bratslavsky<sup>hu</sup>, Yuliya Bratslavsky<sup>hv</sup>, Yuliya Bratslavsky<sup>hw</sup>, Yuliya Bratslavsky<sup>hx</sup>, Yuliya Bratslavsky<sup>hy</sup>, Yuliya Bratslavsky<sup>hz</sup>, Yuliya Bratslavsky<sup>ia</sup>, Yuliya Bratslavsky<sup>ib</sup>, Yuliya Bratslavsky<sup>ic</sup>, Yuliya Bratslavsky<sup>id</sup>, Yuliya Bratslavsky<sup>ie</sup>, Yuliya Bratslavsky<sup>if</sup>, Yuliya Bratslavsky<sup>ig</sup>, Yuliya Bratslavsky<sup>ih</sup>, Yuliya Bratslavsky<sup>ii</sup>, Yuliya Bratslavsky<sup>ij</sup>, Yuliya Bratslavsky<sup>ik</sup>, Yuliya Bratslavsky<sup>il</sup>, Yuliya Bratslavsky<sup>im</sup>, Yuliya Bratslavsky<sup>in</sup>, Yuliya Bratslavsky<sup>io</sup>, Yuliya Bratslavsky<sup>ip</sup>, Yuliya Bratslavsky<sup>iq</sup>, Yuliya Bratslavsky<sup>ir</sup>, Yuliya Bratslavsky<sup>is</sup>, Yuliya Bratslavsky<sup>it</sup>, Yuliya Bratslavsky<sup>iu</sup>, Yuliya Bratslavsky<sup>iv</sup>, Yuliya Bratslavsky<sup>iw</sup>, Yuliya Bratslavsky<sup>ix</sup>, Yuliya Bratslavsky<sup>iy</sup>, Yuliya Bratslavsky<sup>iz</sup>, Yuliya Bratslavsky<sup>ja</sup>, Yuliya Bratslavsky<sup>jb</sup>, Yuliya Bratslavsky<sup>jc</sup>, Yuliya Bratslavsky<sup>jd</sup>, Yuliya Bratslavsky<sup>je</sup>, Yuliya Bratslavsky<sup>jf</sup>, Yuliya Bratslavsky<sup>jh</sup>, Yuliya Bratslavsky<sup>ji</sup>, Yuliya Bratslavsky<sup>jj</sup>, Yuliya Bratslavsky<sup>jk</sup>, Yuliya Bratslavsky<sup>jl</sup>, Yuliya Bratslavsky<sup>jm</sup>, Yuliya Bratslavsky<sup>jn</sup>, Yuliya Bratslavsky<sup>jo</sup>, Yuliya Bratslavsky<sup>jp</sup>, Yuliya Bratslavsky<sup>jq</sup>, Yuliya Bratslavsky<sup>jr</sup>, Yuliya Bratslavsky<sup>js</sup>, Yuliya Bratslavsky<sup>jt</sup>, Yuliya Bratslavsky<sup>ju</sup>, Yuliya Bratslavsky<sup>jv</sup>, Yuliya Bratslavsky<sup>jw</sup>, Yuliya Bratslavsky<sup>jx</sup>, Yuliya Bratslavsky<sup>ky</sup>, Yuliya Bratslavsky<sup>kz</sup>, Yuliya Bratslavsky<sup>la</sup>, Yuliya Bratslavsky<sup>lb</sup>, Yuliya Bratslavsky<sup>lc</sup>, Yuliya Bratslavsky<sup>ld</sup>, Yuliya Bratslavsky<sup>le</sup>, Yuliya Bratslavsky<sup>lf</sup>, Yuliya Bratslavsky<sup>lh</sup>, Yuliya Bratslavsky<sup>li</sup>, Yuliya Bratslavsky<sup>lj</sup>, Yuliya Bratslavsky<sup>lk</sup>, Yuliya Bratslavsky<sup>ll</sup>, Yuliya Bratslavsky<sup>lm</sup>, Yuliya Bratslavsky<sup>ln</sup>, Yuliya Bratslavsky<sup>lo</sup>, Yuliya Bratslavsky<sup>lp</sup>, Yuliya Bratslavsky<sup>lq</sup>, Yuliya Bratslavsky<sup>lr</sup>, Yuliya Bratslavsky<sup>ls</sup>, Yuliya Bratslavsky<sup>lt</sup>, Yuliya Bratslavsky<sup>lu</sup>, Yuliya Bratslavsky<sup>lv</sup>, Yuliya Bratslavsky<sup>lw</sup>, Yuliya Bratslavsky<sup>lx</sup>, Yuliya Bratslavsky<sup>ly</sup>, Yuliya Bratslavsky<sup>lz</sup>, Yuliya Bratslavsky<sup>ma</sup>, Yuliya Bratslavsky<sup>mb</sup>, Yuliya Bratslavsky<sup>mc</sup>, Yuliya Bratslavsky<sup>md</sup>, Yuliya Bratslavsky<sup>me</sup>, Yuliya Bratslavsky<sup>mf</sup>, Yuliya Bratslavsky<sup>mh</sup>, Yuliya Bratslavsky<sup>mi</sup>, Yuliya Bratslavsky<sup>mj</sup>, Yuliya Bratslavsky<sup>mk</sup>, Yuliya Bratslavsky<sup>ml</sup>, Yuliya Bratslavsky<sup>mm</sup>, Yuliya Bratslavsky<sup>mn</sup>, Yuliya Bratslavsky<sup>mo</sup>, Yuliya Bratslavsky<sup>mp</sup>, Yuliya Bratslavsky<sup>mq</sup>, Yuliya Bratslavsky<sup>mr</sup>, Yuliya Bratslavsky<sup>ms</sup>, Yuliya Bratslavsky<sup>mt</sup>, Yuliya Bratslavsky<sup>mu</sup>, Yuliya Bratslavsky<sup>mv</sup>, Yuliya Bratslavsky<sup>mw</sup>, Yuliya Bratslavsky<sup>mx</sup>, Yuliya Bratslavsky<sup>my</sup>, Yuliya Bratslavsky<sup>mz</sup>, Yuliya Bratslavsky<sup>na</sup>, Yuliya Bratslavsky<sup>nb</sup>, Yuliya Bratslavsky<sup>nc</sup>, Yuliya Bratslavsky<sup>nd</sup>, Yuliya Bratslavsky<sup>ne</sup>, Yuliya Bratslavsky<sup>nf</sup>, Yuliya Bratslavsky<sup>nh</sup>, Yuliya Bratslavsky<sup>ni</sup>, Yuliya Bratslavsky<sup>nj</sup>, Yuliya Bratslavsky<sup>nk</sup>, Yuliya Bratslavsky<sup>nl</sup>, Yuliya Bratslavsky<sup>nm</sup>, Yuliya Bratslavsky<sup>nn</sup>, Yuliya Bratslavsky<sup>no</sup>, Yuliya Bratslavsky<sup>np</sup>, Yuliya Bratslavsky<sup>nq</sup>, Yuliya Bratslavsky<sup>nr</sup>, Yuliya Bratslavsky<sup>ns</sup>, Yuliya Bratslavsky<sup>nt</sup>, Yuliya Bratslavsky<sup>nu</sup>, Yuliya Bratslavsky<sup>nv</sup>, Yuliya Bratslavsky<sup>nw</sup>, Yuliya Bratslavsky<sup>nx</sup>, Yuliya Bratslavsky<sup>ny</sup>, Yuliya Bratslavsky<sup>nz</sup>, Yuliya Bratslavsky<sup>oa</sup>, Yuliya Bratslavsky<sup>ob</sup>, Yuliya Bratslavsky<sup>oc</sup>, Yuliya Bratslavsky<sup>od</sup>, Yuliya Bratslavsky<sup>oe</sup>, Yuliya Bratslavsky<sup>of</sup>, Yuliya Bratslavsky<sup>oh</sup>, Yuliya Bratslavsky<sup>oi</sup>, Yuliya Bratslavsky<sup>oj</sup>, Yuliya Bratslavsky<sup>ok</sup>, Yuliya Bratslavsky<sup>ol</sup>, Yuliya Bratslavsky<sup>om</sup>, Yuliya Bratslavsky<sup>on</sup>, Yuliya Bratslavsky<sup>oo</sup>, Yuliya Bratslavsky<sup>op</sup>, Yuliya Bratslavsky<sup>oq</sup>, Yuliya Bratslavsky<sup>or</sup>, Yuliya Bratslavsky<sup>os</sup>, Yuliya Bratslavsky<sup>ot</sup>, Yuliya Bratslavsky<sup>ou</sup>, Yuliya Bratslavsky<sup>ov</sup>, Yuliya Bratslavsky<sup>ow</sup>, Yuliya Bratslavsky<sup>ox</sup>, Yuliya Bratslavsky<sup>oy</sup>, Yuliya Bratslavsky<sup>oz</sup>, Yuliya Bratslavsky<sup>pa</sup>, Yuliya Bratslavsky<sup>pb</sup>, Yuliya Bratslavsky<sup>pc</sup>, Yuliya Bratslavsky<sup>pd</sup>, Yuliya Bratslavsky<sup>pe</sup>, Yuliya Bratslavsky<sup>pf</sup>, Yuliya Bratslavsky<sup>ph</sup>, Yuliya Bratslavsky<sup>pi</sup>, Yuliya Bratslavsky<sup>pj</sup>, Yuliya Bratslavsky<sup>pk</sup>, Yuliya Bratslavsky<sup>pl</sup>, Yuliya Bratslavsky<sup>pm</sup>, Yuliya Bratslavsky<sup>pn</sup>, Yuliya Bratslavsky<sup>po</sup>, Yuliya Bratslavsky<sup>pp</sup>, Yuliya Bratslavsky<sup>pq</sup>, Yuliya Bratslavsky<sup>pr</sup>, Yuliya Bratslavsky<sup>ps</sup>, Yuliya Bratslavsky<sup>pt</sup>, Yuliya Bratslavsky<sup>pu</sup>, Yuliya Bratslavsky<sup>pv</sup>, Yuliya Bratslavsky<sup>pw</sup>, Yuliya Bratslavsky<sup>px</sup>, Yuliya Bratslavsky<sup>py</sup>, Yuliya Bratslavsky<sup>pz</sup>, Yuliya Bratslavsky<sup>qa</sup>, Yuliya Bratslavsky<sup>qb</sup>, Yuliya Bratslavsky<sup>qc</sup>, Yuliya Bratslavsky<sup>qd</sup>, Yuliya Bratslavsky<sup>qe</sup>, Yuliya Bratslavsky<sup>qf</sup>, Yuliya Bratslavsky<sup>qh</sup>, Yuliya Bratslavsky<sup>qi</sup>, Yuliya Bratslavsky<sup>qj</sup>, Yuliya Bratslavsky<sup>qk</sup>, Yuliya Bratslavsky<sup>ql</sup>, Yuliya Bratslavsky<sup>qm</sup>, Yuliya Bratslavsky<sup>qn</sup>, Yuliya Bratslavsky<sup>qo</sup>, Yuliya Bratslavsky<sup>qp</sup>, Yuliya Bratslavsky<sup>qq</sup>, Yuliya Bratslavsky<sup>qr</sup>, Yuliya Bratslavsky<sup>qs</sup>, Yuliya Bratslavsky<sup>qt</sup>, Yuliya Bratslavsky<sup>qu</sup>, Yuliya Bratslavsky<sup>qv</sup>, Yuliya Bratslavsky<sup>qw</sup>, Yuliya Bratslavsky<sup>qx</sup>, Yuliya Bratslavsky<sup>qy</sup>, Yuliya Bratslavsky<sup>qz</sup>, Yuliya Bratslavsky<sup>ra</sup>, Yuliya Bratslavsky<sup>rb</sup>, Yuliya Bratslavsky<sup>rc</sup>, Yuliya Bratslavsky<sup>rd</sup>, Yuliya Bratslavsky<sup>re</sup>, Yuliya Bratslavsky<sup>rf</sup>, Yuliya Bratslavsky<sup>rh</sup>, Yuliya Bratslavsky<sup>ri</sup>, Yuliya Bratslavsky<sup>rj</sup>, Yuliya Bratslavsky<sup>rk</sup>, Yuliya Bratslavsky<sup>rl</sup>, Yuliya Bratslavsky<sup>rm</sup>, Yuliya Bratslavsky<sup>rn</sup>, Yuliya Bratslavsky<sup>ro</sup>, Yuliya Bratslavsky<sup>rp</sup>, Yuliya Bratslavsky<sup>rq</sup>, Yuliya Bratslavsky<sup>rr</sup>, Yuliya Bratslavsky<sup>rs</sup>, Yuliya Bratslavsky<sup>rt</sup>, Yuliya Bratslavsky<sup>ru</sup>, Yuliya Bratslavsky<sup>rv</sup>, Yuliya Bratslavsky<sup>rw</sup>, Yuliya Bratslavsky<sup>rx</sup>, Yuliya Bratslavsky<sup>ry</sup>, Yuliya Bratslavsky<sup>rz</sup>, Yuliya Bratslavsky<sup>sa</sup>, Yuliya Bratslavsky<sup>sb</sup>, Yuliya Bratslavsky<sup>sc</sup>, Yuliya Bratslavsky<sup>sd</sup>, Yuliya Bratslavsky<sup>se</sup>, Yuliya Bratslavsky<sup>sf</sup>, Yuliya Bratslavsky<sup>sh</sup>, Yuliya Bratslavsky<sup>si</sup>, Yuliya Bratslavsky<sup>sj</sup>, Yuliya Bratslavsky<sup>sk</sup>, Yuliya Bratslavsky<sup>sl</sup>, Yuliya Bratslavsky<sup>sm</sup>, Yuliya Bratslavsky<sup>sn</sup>, Yuliya Bratslavsky<sup>so</sup>, Yuliya Bratslavsky<sup>sp</sup>, Yuliya Bratslavsky<sup>sq</sup>, Yuliya Bratslavsky<sup>sr</sup>, Yuliya Bratslavsky<sup>ss</sup>, Yuliya Bratslavsky<sup>st</sup>, Yuliya Bratslavsky<sup>su</sup>, Yuliya Bratslavsky<sup>sv</sup>, Yuliya Bratslavsky<sup>sw</sup>, Yuliya Bratslavsky<sup>sx</sup>, Yuliya Bratslavsky<sup>sy</sup>, Yuliya Bratslavsky<sup>sz</sup>, Yuliya Bratslavsky<sup>ta</sup>, Yuliya Bratslavsky<sup>tb</sup>, Yuliya Bratslavsky<sup>tc</sup>, Yuliya Bratslavsky<sup>td</sup>, Yuliya Bratslavsky<sup>te</sup>, Yuliya Bratslavsky<sup>tf</sup>, Yuliya Bratslavsky<sup>th</sup>, Yuliya Bratslavsky<sup>ti</sup>, Yuliya Bratslavsky<sup>tj</sup>, Yuliya Bratslavsky<sup>tk</sup>, Yuliya Bratslavsky<sup>tl</sup>, Yuliya Bratslavsky<sup>tm</sup>, Yuliya Bratslavsky<sup>tn</sup>, Yuliya Bratslavsky<sup>to</sup>, Yuliya Bratslavsky<sup>tp</sup>, Yuliya Bratslavsky<sup>tq</sup>, Yuliya Bratslavsky<sup>tr</sup>, Yuliya Bratslavsky<sup>ts</sup>, Yuliya Bratslavsky<sup>tt</sup>, Yuliya Bratslavsky<sup>tu</sup>, Yuliya Bratslavsky<sup>tv</sup>, Yuliya Bratslavsky<sup>tw</sup>, Yuliya Bratslavsky<sup>tx</sup>, Yuliya Bratslavsky<sup>ty</sup>, Yuliya Bratslavsky<sup>tz</sup>, Yuliya Bratslavsky<sup>ua</sup>, Yuliya Bratslavsky<sup>ub</sup>, Yuliya Bratslavsky<sup>uc</sup>, Yuliya Bratslavsky<sup>ud</sup>, Yuliya Bratslavsky<sup>ue</sup>, Yuliya Bratslavsky<sup>uf</sup>, Yuliya Bratslavsky<sup>uh</sup>, Yuliya Bratslavsky<sup>ui</sup>, Yuliya Bratslavsky<sup>uj</sup>, Yuliya Bratslavsky<sup>uk</sup>, Yuliya Bratslavsky<sup>ul</sup>, Yuliya Bratslavsky<sup>um</sup>, Yuliya Bratslavsky<sup>un</sup>, Yuliya Bratslavsky<sup>uo</sup>, Yuliya Bratslavsky<sup>up</sup>, Yuliya Bratslavsky<sup>uq</sup>, Yuliya Bratslavsky<sup>ur</sup>, Yuliya Bratslavsky<sup>us</sup>, Yuliya Bratslavsky<sup>ut</sup>, Yuliya Bratslavsky<sup>uu</sup>, Yuliya Bratslavsky<sup>uv</sup>, Yuliya Bratslavsky<sup>uw</sup>, Yuliya Bratslavsky<sup>ux</sup>, Yuliya Bratslavsky<sup>uy</sup>, Yuliya Bratslavsky<sup>uz</sup>, Yuliya Bratslavsky<sup>va</sup>, Yuliya Bratslavsky<sup>vb</sup>, Yuliya Bratslavsky<sup>vc</sup>, Yuliya Bratslavsky<sup>vd</sup>, Yuliya Bratslavsky<sup>ve</sup>, Yuliya Bratslavsky<sup>vf</sup>, Yuliya Bratslavsky<sup>vh</sup>, Yuliya Bratslavsky<sup>vi</sup>, Yuliya Bratslavsky<sup>vj</sup>, Yuliya Bratslavsky<sup>vk</sup>, Yuliya Bratslavsky<sup>vl</sup>, Yuliya Bratslavsky<sup>vm</sup>, Yuliya Bratslavsky<sup>vn</sup>, Yuliya Bratslavsky<sup>vo</sup>, Yuliya Bratslavsky<sup>vp</sup>, Yuliya Bratslavsky<sup>vq</sup>, Yuliya Bratslavsky<sup>vr</sup>, Yuliya Bratslavsky<sup>vs</sup>, Yuliya Bratslavsky<sup>vt</sup>, Yuliya Bratslavsky<sup>vu</sup>, Yuliya Bratslavsky<sup>vv</sup>, Yuliya Bratslavsky<sup>vw</sup>, Yuliya Bratslavsky<sup>vx</sup>, Yuliya Bratslavsky<sup>vy</sup>, Yuliya Bratslavsky<sup>vz</sup>, Yuliya Bratslavsky<sup>wa</sup>, Yuliya Bratslavsky<sup>wb</sup>, Yuliya Bratslavsky<sup>wc</sup>, Yuliya Bratslavsky<sup>wd</sup>, Yuliya Bratslavsky<sup>we</sup>, Yuliya Bratslavsky<sup>wf</sup>, Yuliya Bratslavsky<sup>wh</sup>, Yuliya Bratslavsky<sup>wi</sup>, Yuliya Bratslavsky<sup>wj</sup>, Yuliya Bratslavsky<sup>wk</sup>, Yuliya Bratslavsky<sup>wl</sup>, Yuliya Bratslavsky<sup>wm</sup>, Yuliya Bratslavsky<sup>wn</sup>, Yuliya Bratslavsky<sup>wo</sup>, Yuliya Bratslavsky<sup>wp</sup>, Yuliya Bratslavsky<sup>wq</sup>, Yuliya Bratslavsky<sup>wr</sup>, Yuliya Bratslavsky<sup>ws</sup>, Yuliya Bratslavsky<sup>wt</sup>, Yuliya Bratslavsky<sup>wu</sup>, Yuliya Bratslavsky<sup>wv</sup>, Yuliya Bratslavsky<sup>wx</sup>, Yuliya Bratslavsky<sup>wy</sup>, Yuliya Bratslavsky<sup>wz</sup>, Yuliya Bratslavsky<sup>xa</sup>, Yuliya Bratslavsky<sup>xb</sup>, Yuliya Bratslavsky<sup>xc</sup>, Yuliya Bratslavsky<sup>xd</sup>, Yuliya Bratslavsky<sup>xe</sup>, Yuliya Bratslavsky<sup>xf</sup>, Yuliya Bratslavsky<sup>xh</sup>, Yuliya Bratslavsky<sup>xi</sup>, Yuliya Bratslavsky<sup>xj</sup>, Yuliya Bratslavsky<sup>xk</sup>, Yuliya Bratslavsky<sup>xl</sup>, Yuliya Bratslavsky<sup>xm</sup>, Yuliya Bratslavsky<sup>xn</sup>, Yuliya Bratslavsky<sup>xo</sup>, Yuliya Bratslavsky<sup>xp</sup>, Yuliya Bratslavsky<sup>xq</sup>, Yuliya Bratslavsky<sup>xr</sup>, Yuliya Bratslavsky<sup>xs</sup>, Yuliya Bratslavsky<sup>xt</sup>, Yuliya Bratslavsky<sup>xu</sup>, Yuliya Bratslavsky<sup>xv</sup>, Yuliya Bratslavsky<sup>xw</sup>, Yuliya Bratslavsky<sup>xy</sup>, Yuliya Bratslavsky<sup>xz</sup>, Yuliya Bratslavsky<sup>ya</sup>, Yuliya Bratslavsky<sup>yb</sup>, Yuliya Bratslavsky<sup>yc</sup>, Yuliya Bratslavsky<sup>yd</sup>, Yuliya Bratslavsky<sup>ye</sup>, Yuliya Bratslavsky<sup>yf</sup>, Yuliya Bratslavsky<sup>yh</sup>, Yuliya Bratslavsky<sup>yi</sup>, Yuliya Bratslavsky<sup>yj</sup>, Yuliya Bratslavsky<sup>yk</sup>, Yuliya Bratslavsky<sup>yl</sup>, Yuliya Bratslavsky<sup>ym</sup>, Yuliya Bratslavsky<sup>yn</sup>, Yuliya Bratslavsky<sup>yo</sup>, Yuliya Bratslavsky<sup>yp</sup>, Yuliya Bratslavsky<sup>yq</sup>, Yuliya Bratslavsky<sup>yr</sup>, Yuliya Bratslavsky<sup>ys</sup>, Yuliya Bratslavsky<sup>yt</sup>, Yuliya Bratslavsky<sup>yu</sup>, Yuliya Bratslavsky<sup>yv</sup>, Yuliya Bratslavsky<sup>yw</sup>, Yuliya Bratslavsky<sup>yx</sup>, Yuliya Bratslavsky<sup>yy</sup>, Yuliya Bratslavsky<sup>yz</sup>, Yuliya Bratslavsky<sup>za</sup>, Yuliya Bratslavsky<sup>zb</sup>, Yuliya Bratslavsky<sup>zc</sup>, Yuliya Bratslavsky<sup>zd</sup>, Yuliya Bratslavsky<sup>ze</sup>, Yuliya Bratslavsky<sup>zf</sup>, Yuliya Bratslavsky<sup>zh</sup>, Yuliya Bratslavsky<sup>zi</sup>, Yuliya Bratslavsky<sup>zj</sup>, Yuliya Bratslavsky<sup>zk</sup>, Yuliya Bratslavsky<sup>zl</sup>, Yuliya Bratslavsky<sup>zm</sup>, Yuliya Bratslavsky<sup>zn</sup>, Yuliya Bratslavsky<sup>zo</sup>, Yuliya Bratslavsky<sup>zp</sup>, Yuliya Bratslavsky<sup>zq</sup>, Yuliya Bratslavsky<sup>zr</sup>, Yuliya Bratslavsky<sup>zs</sup>, Yuliya Bratslavsky<sup>zt</sup>, Yuliya Bratslavsky<sup>zu</sup>, Yuliya Bratslavsky<sup>zv</sup>, Yuliya Bratslavsky<sup>zw</sup>, Yuliya Bratslavsky<sup>zx</sup>, Yuliya Bratslavsky<sup>zy</sup>, Yuliya Bratslavsky<sup>zz</sup>

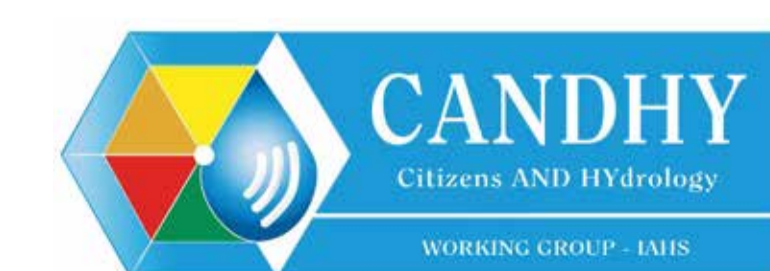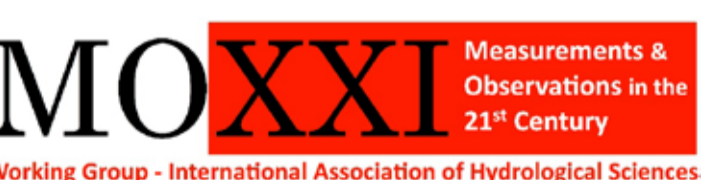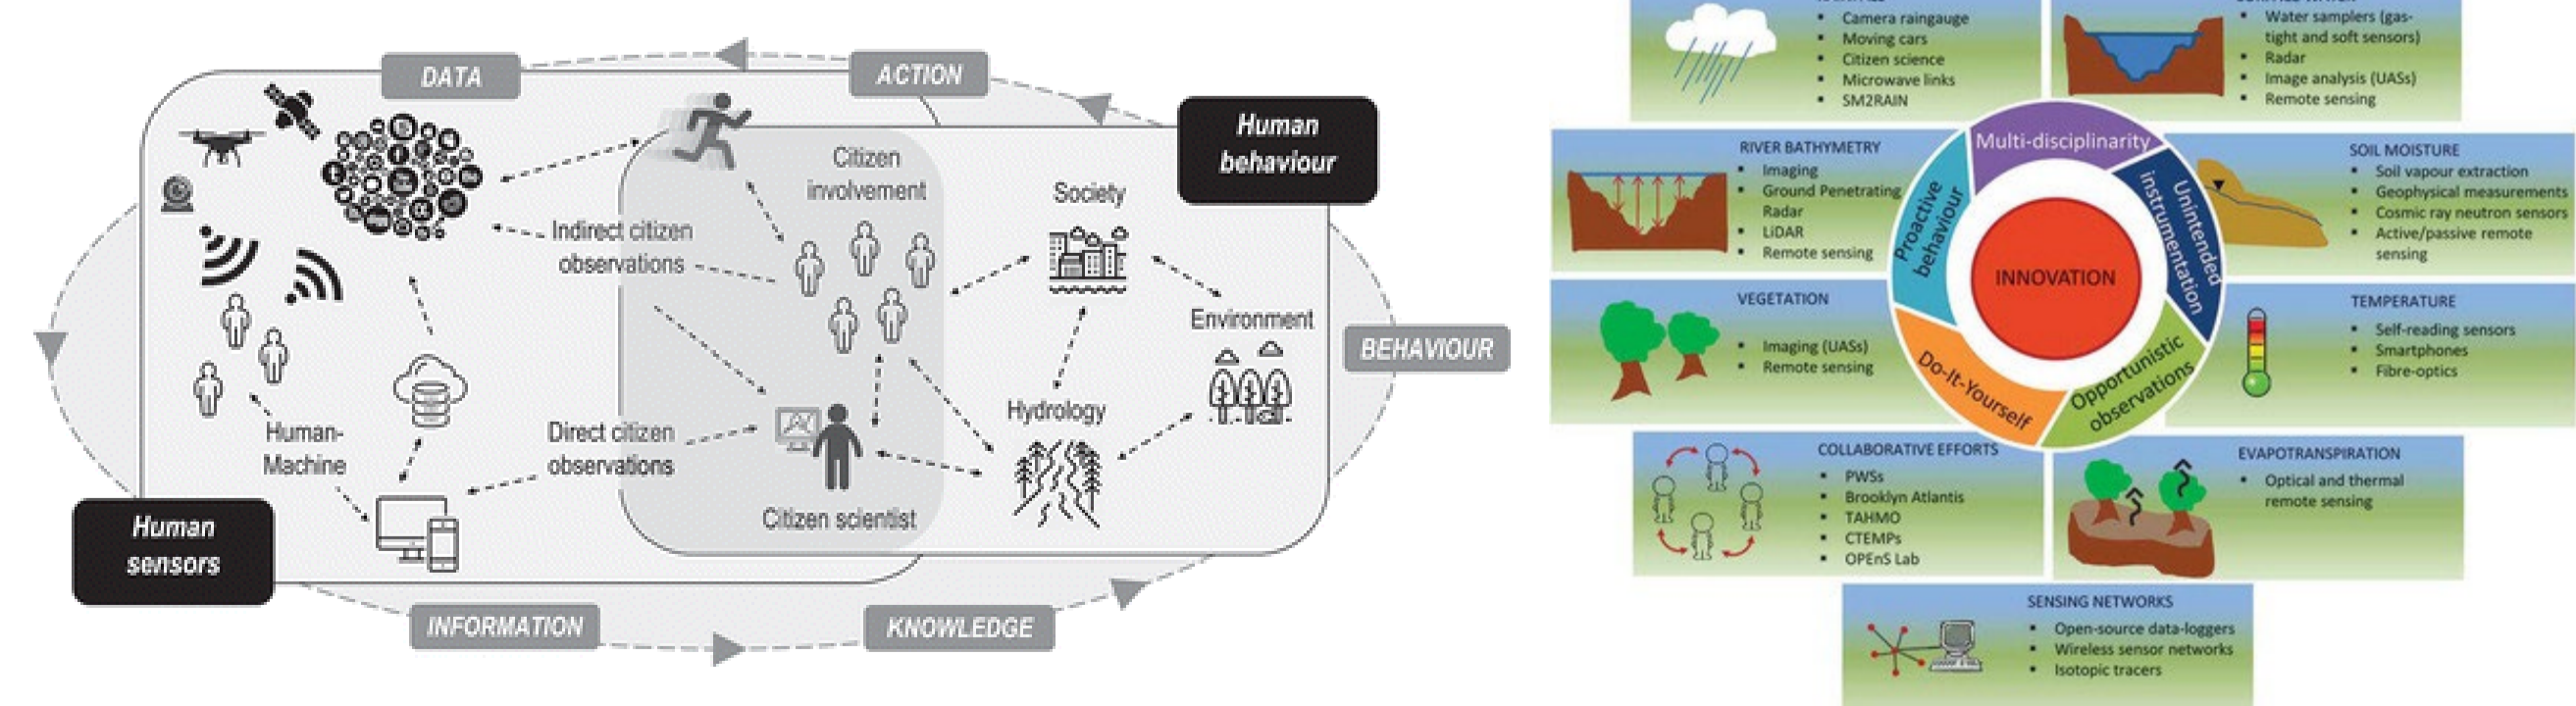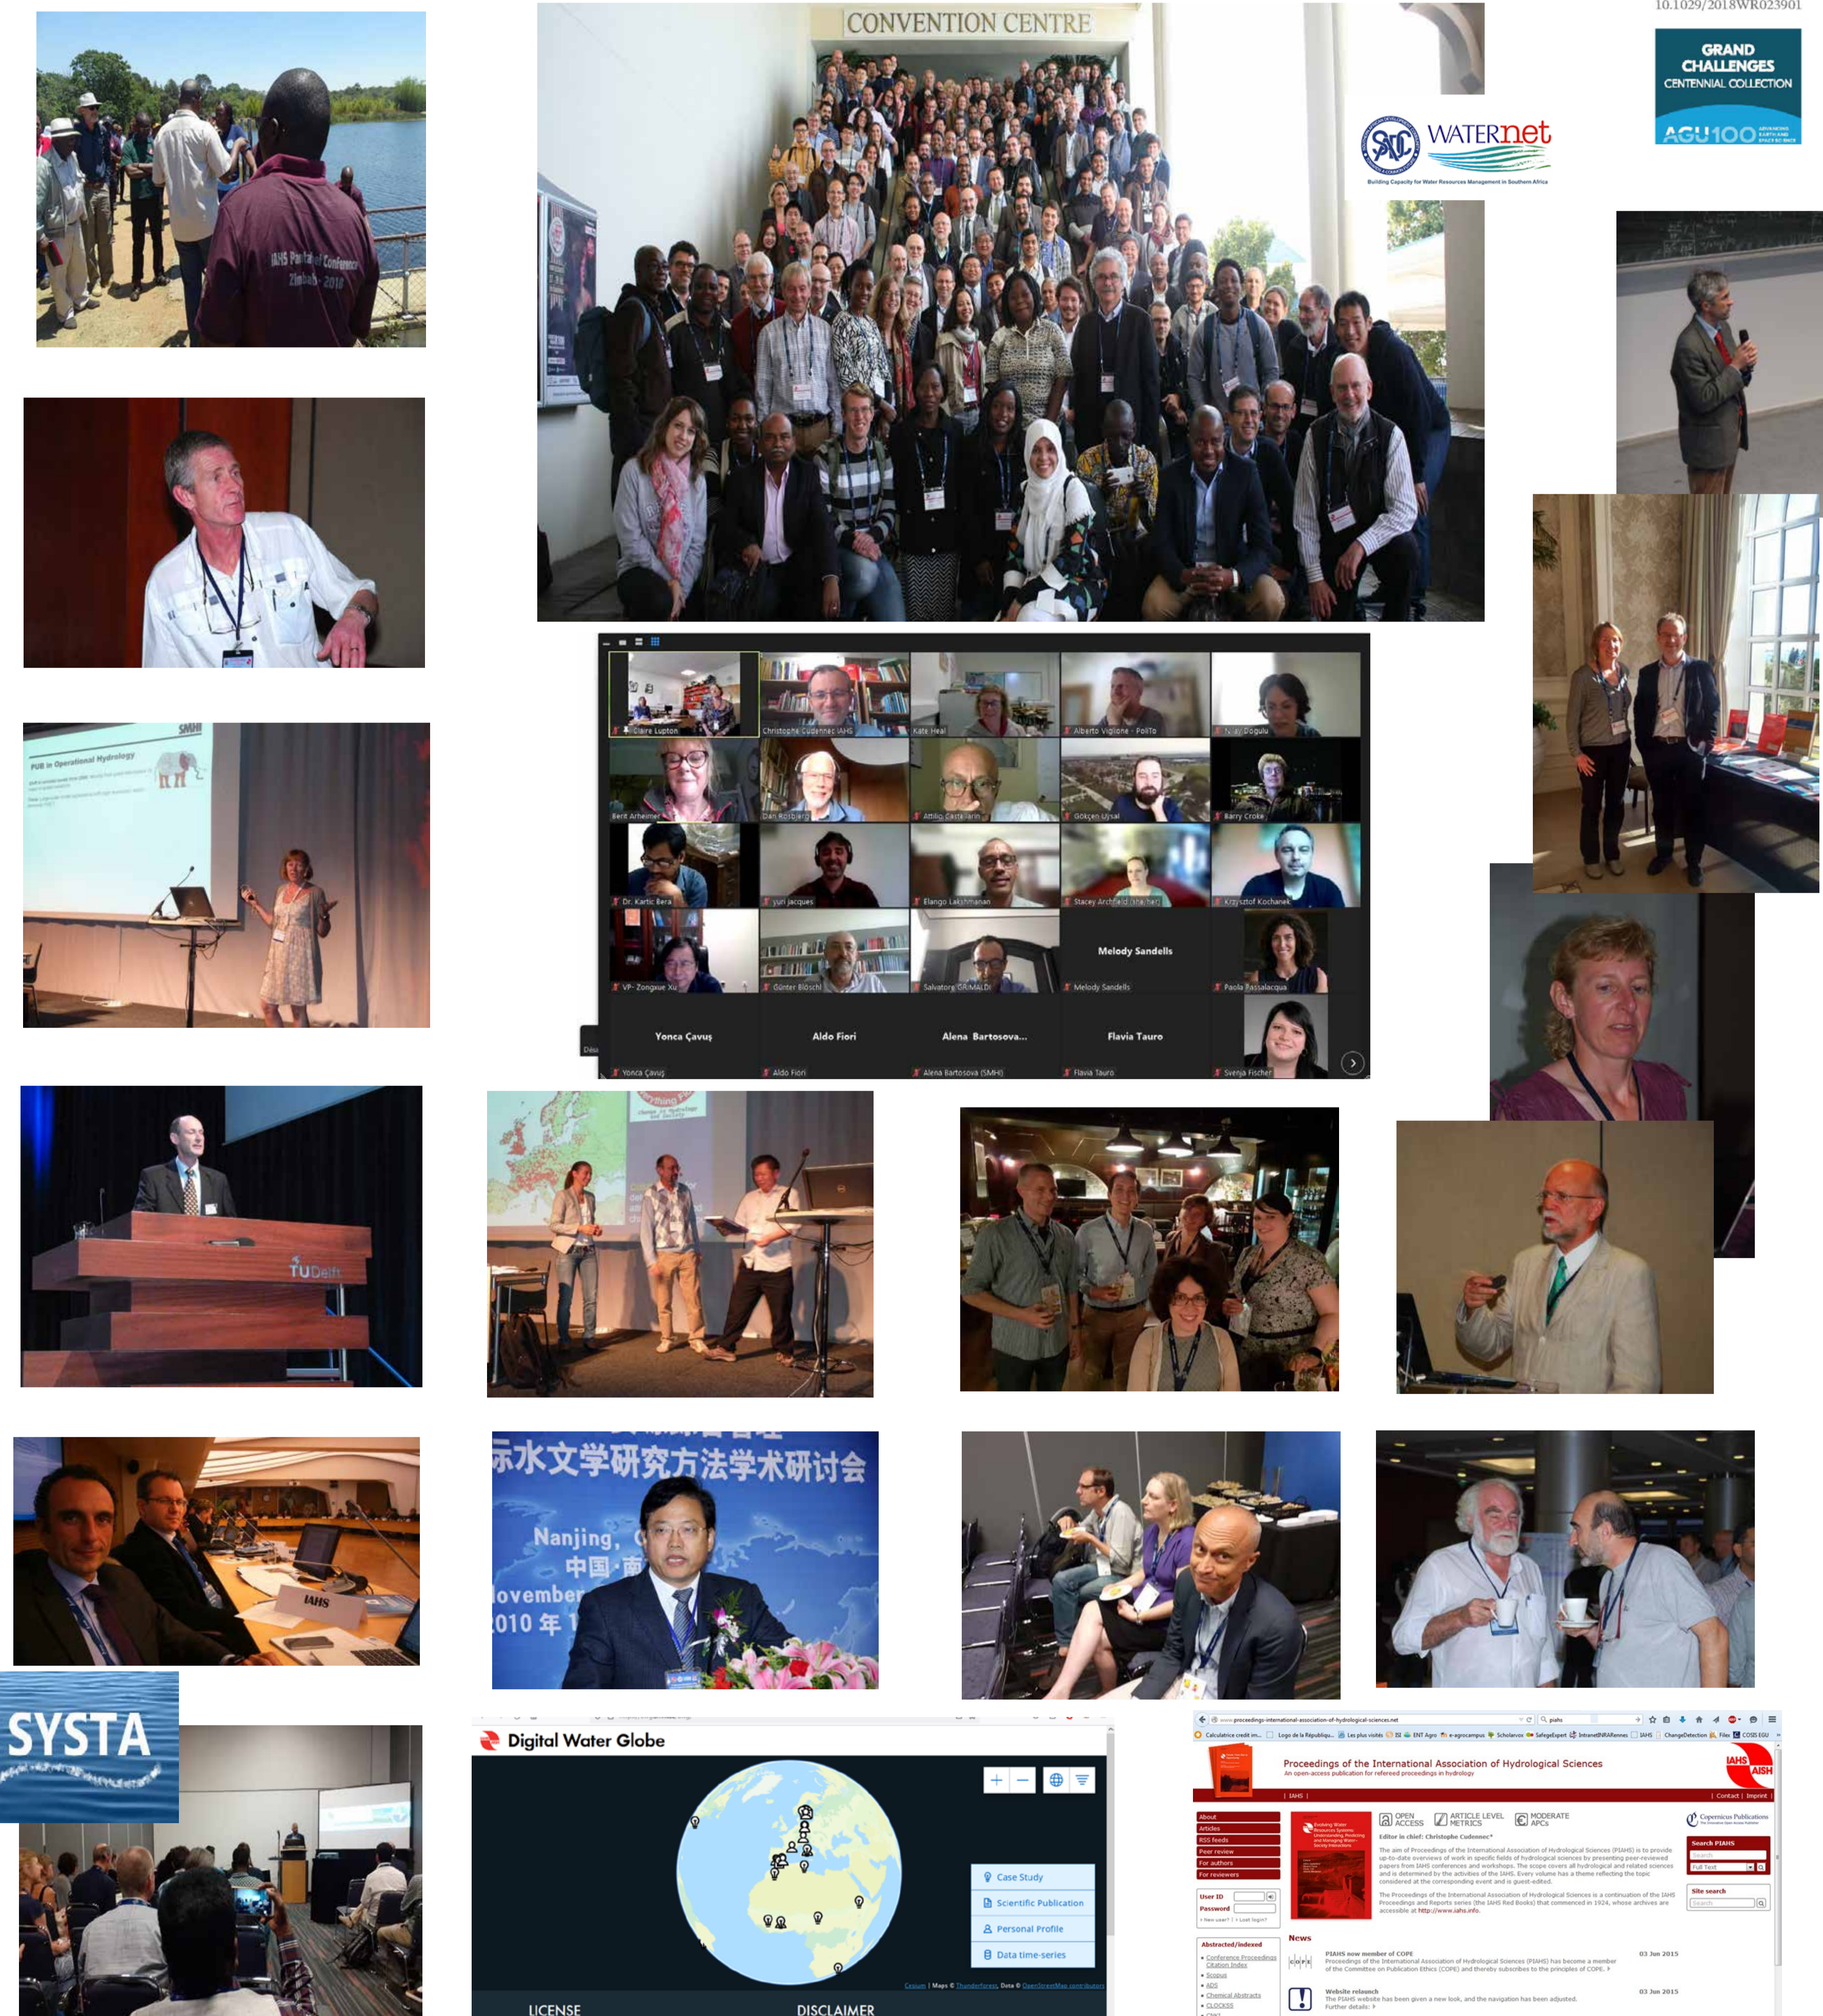

Early Career committee, Partnership with Waternet, Archive digitization, PIAHS transition, SYSTA Grants, Water Globe platform, EDI Policy

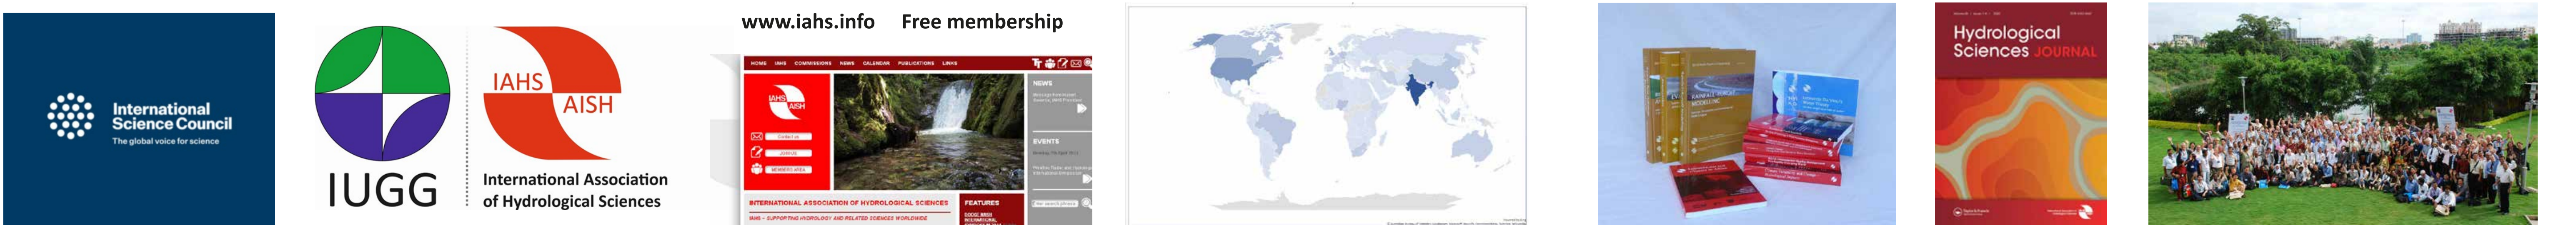

Supplement: Supplementary file 1 [file piahs-385-499-2025-supplement.pdf]
